# Supplementary material for: Designed divergent evolution of enzyme function
Source: Springer Nature journal article supplement (doi:10.1038/nature04607), 2006-02-22
Supplement: 41586_2006_BFnature04607_MOESM1_ESM.pdf [file 41586_2006_BFnature04607_MOESM1_ESM.pdf]

**Supplementary Table 1.** Library quality for saturation mutagenesis

|                    | Ser | Val | Cys | Ile | Asn | Pro | Ala | Gly | Thr | Xxx | Others | Sum |
|--------------------|-----|-----|-----|-----|-----|-----|-----|-----|-----|-----|--------|-----|
| 1 <sup>st</sup> 80 | 6   | 9   | 1   | 2   | 2   | 3   | 6   | 4   | 5   | 4   | 38     | 80  |
| 2 <sup>nd</sup> 80 | 3   | 7   | 1   | 3   | 2   | 3   | 3   | 7   | 3   | 4   | 44     | 80  |
| Sum                | 9   | 16  | 2   | 5   | 4   | 6   | 9   | 11  | 8   | 8   | 82     | 160 |

We used saturation mutagenesis at S484 to determine the quality of the library. We screened 160 mutants; 92% coverage of full diversity (The plasmids of 20 different clones from the library were first purified, digested, and run on the agarose gel. All clones contained inserts of the correct size.). After the screening, the number of occurrences was counted based on the product profile, and the representatives were sequenced. ‘Others’ indicates the clones whose *in vivo* productivity was not detected. As shown in the above table, the substitutions were well distributed for the relatively smaller sized residues listed above, and roughly half of all clones corresponded to those residues. The other half of the clones should correspond to the relatively larger, aromatic, and charged (10 other) residues (not listed). We did not sequence the last substitution notated by ‘Xxx’ in the table, because *in vivo* productivity was very low. The number 80 is a simply the number that we can screen using GC-MS in a day and that gives sufficient coverage as indicated in the table. Interestingly, charged residues such as K, R, D, and E were rarely found from screening for any residues. The hydrophilic property of these residues should not be suitable for hydrophobic active site.

**Supplementary Table 2.  $\beta$ -bisabolene synthase construction**

| Clones     |                     | Product Distributions (%) |          |          |          |          |          |             | Yield* <sup>1</sup> |
|------------|---------------------|---------------------------|----------|----------|----------|----------|----------|-------------|---------------------|
| Generation | Mutations           | <b>1</b>                  | <b>2</b> | <b>3</b> | <b>4</b> | <b>5</b> | <b>6</b> | <b>7</b>    | (times)             |
| WT         | WT                  | 3.3                       | 26.1     | 36.1     | 16.4     | 6.1      | 5.6      | <b>3.3</b>  | 1                   |
| 1          | M447H               | 12.2                      | 2.0      | 21.4     | 9.9      | 5.4      | 1.0      | <b>48.3</b> | 9.1                 |
| 2          | A336V, M447H        | 18.5                      | 0.4      | 3.9      | 3.9      | 1.9      | 0.1      | <b>71.2</b> | 13.0                |
| 3-1 (BBA)  | A336V, M447H, I562T | 6.4                       | 0.5      | 4.4      | 7.1      | 1.8      | 0.3      | <b>79.4</b> | 3.5                 |
| 3-2        | A336V, M447H, I562V | 15.5                      | 0.3      | 2.4      | 3.9      | 1.4      | 0.2      | <b>76.4</b> | 6.4                 |

  

| Predicted Clones |                                    | Predicted Product Distributions (%) |          |          |          |          |          |             |
|------------------|------------------------------------|-------------------------------------|----------|----------|----------|----------|----------|-------------|
| Clones           | Mutations* <sup>2</sup>            | <b>1</b>                            | <b>2</b> | <b>3</b> | <b>4</b> | <b>5</b> | <b>6</b> | <b>7</b>    |
| 2                | A336V, <b><i>M447H</i></b>         | 16.7                                | 0.5      | 5.7      | 2.5      | 2.2      | 0.2      | <b>72.2</b> |
| 3-1              | A336V, <b><i>M447H</i></b> , I562T | 8.8                                 | 0.3      | 3.1      | 2.4      | 1.5      | 0.2      | <b>83.9</b> |
| 3-2              | A336V, <b><i>M447H</i></b> , I562V | 8.3                                 | 0.2      | 1.7      | 1.0      | 0.7      | 0.1      | <b>88.1</b> |
| 3-1              | <b><i>A336V, M447H</i></b> , I562T | 9.7                                 | 0.3      | 2.1      | 3.7      | 1.3      | 0.1      | <b>82.9</b> |
| 3-2              | <b><i>A336V, M447H</i></b> , I562V | 9.3                                 | 0.1      | 1.2      | 1.5      | 0.6      | 0.0      | <b>87.3</b> |

ND means "Production is not detected"

**WT** = wild type, **BBA** = $\beta$ -bisabolene(7) synthase,

*E*- $\beta$ -farnesene(**1**), sibirene(**2**),  $\gamma$ -humulene(**3**), longifolene(**4**),  $\alpha$ -longipinene(**5**),  $\alpha$ -ylangene(**6**), and *Z,E*- $\alpha$ -farnesene (**8**)

Each product distribution was normalized to total of **1-7** product distribution as 100%

All product distributions were determined from triplicates, and standard deviations were lower than 2 %.

\*<sup>1</sup> The yield is the *in vivo* productivity of a particular compound by each mutant over that by the wild type enzyme.

\*<sup>2</sup>The starting product distribution used was represented as bold and italic

**Supplementary Table 3. Sibirene synthase construction.**

| Clones<br>Generation | Mutations           | Product Distributions (%) |             |          |          |          |          |          | Yield* <sup>1</sup><br>(times) |
|----------------------|---------------------|---------------------------|-------------|----------|----------|----------|----------|----------|--------------------------------|
|                      |                     | <b>1</b>                  | <b>2</b>    | <b>3</b> | <b>4</b> | <b>5</b> | <b>6</b> | <b>7</b> |                                |
| WT                   | WT                  | 3.3                       | <b>26.1</b> | 36.1     | 16.4     | 6.1      | 5.6      | 3.3      | 1                              |
| 1                    | M447F               | 2.7                       | <b>46.4</b> | 23.5     | 20.7     | 1.3      | 3.3      | 2.1      | 2.2                            |
| 2                    | F312Q, M447F        | 3.7                       | <b>79.4</b> | 10.3     | 4.0      | 0.4      | 1.6      | 0.6      | 2.3                            |
| 3 (SIB)              | F312Q, M339A, M447F | 3.3                       | <b>80.7</b> | 11.1     | 3.4      | 0.3      | 1.1      | ND       | 2.7                            |
| 3                    | F312Q, M339L, M447F | 6.0                       | <b>75.4</b> | 19.5     | 6.3      | 0.5      | 0.7      | ND       | 0.9                            |

  

| Predicted<br>Clones | Mutations* <sup>2</sup>                          | Product Distributions (%) |             |          |          |          |          |          |
|---------------------|--------------------------------------------------|---------------------------|-------------|----------|----------|----------|----------|----------|
|                     |                                                  | <b>1</b>                  | <b>2</b>    | <b>3</b> | <b>4</b> | <b>5</b> | <b>6</b> | <b>7</b> |
| 2                   | F312Q, <b><i>M447F</i></b>                       | 1.8                       | <b>73.3</b> | 11.2     | 11.2     | 0.3      | 1.8      | 0.5      |
| 3-1                 | F312Q, M339L, <b><i>M447F</i></b>                | 5.1                       | <b>77.7</b> | 9.9      | 4.8      | 0.1      | 2.2      | 0.3      |
| 3-2                 | <b><i>F312Q</i></b> , M339L, <b><i>M447F</i></b> | 9.9                       | <b>77.8</b> | 8.4      | 1.6      | 0.1      | 1.8      | 0.3      |

ND means "Production is not detected"

**WT** = wild type, **SIB** = sibirene(**2**) synthase,

*E*- $\beta$ -farnesene(**1**),  $\gamma$ -humulene(**3**), longifolene(**4**),  $\alpha$ -longipinene(**5**),  $\alpha$ -ylangene(**6**),  $\beta$ -bisabolene(**7**), and *Z,E*- $\alpha$ -farnesene (**8**)

Each product distribution was normalized to total of **1-7** product distribution as 100%

All product distributions were determined from triplicates, and standard deviations were lower than 2 %.

\*<sup>1</sup> The yield is the *in vivo* productivity of a particular compound by each mutant over that by the wild type enzyme.

\*<sup>2</sup>The starting product distribution used was represented as bold and italic

**Supplementary Table 4.  $\gamma$ -humulene synthase construction.**

| Clones     |                     | Product Distributions (%) |          |             |          |          |          |          | Yield* <sup>1</sup> |
|------------|---------------------|---------------------------|----------|-------------|----------|----------|----------|----------|---------------------|
| Generation | Mutations           | <b>1</b>                  | <b>2</b> | <b>3</b>    | <b>4</b> | <b>5</b> | <b>6</b> | <b>7</b> | (times)             |
| WT         | WT                  | 3.3                       | 26.1     | <b>36.1</b> | 16.4     | 6.1      | 5.6      | 3.3      | 1                   |
| 1          | S484C               | 1.6                       | 1.6      | <b>13.7</b> | 59.6     | 16.3     | 3.6      | 3.6      | 0.37                |
| 2          | M339N, S484C        | 4.0                       | 0.8      | <b>73.1</b> | 7.9      | 7.8      | 6.4      | ND       | 0.36                |
| 3 (HUM)    | M339N, S484C, M565I | 2.9                       | 0.6      | <b>77.8</b> | 4.7      | 6.3      | 7.8      | ND       | 0.64                |

  

| Predicted |                                    | Product Distributions (%) |          |          |          |          |          |          |
|-----------|------------------------------------|---------------------------|----------|----------|----------|----------|----------|----------|
| Clones    | Mutations* <sup>2</sup>            | <b>1</b>                  | <b>2</b> | <b>3</b> | <b>4</b> | <b>5</b> | <b>6</b> | <b>7</b> |
| 2         | M339N, <b><i>S484C</i></b>         | 27.6                      | 1.7      | 27.3     | 20.1     | 0.0      | 22.2     | 1.0      |
| 3-1       | M339N, <b><i>S484C</i></b> , M565I | 19.8                      | 1.8      | 32.4     | 16.0     | 0.0      | 28.6     | 1.4      |
| 3-2       | <b><i>M339N, S484C</i></b> , M565I | 2.6                       | 0.7      | 76.8     | 5.6      | 7.0      | 7.3      | 0.0      |

ND means "Production is not detected"

**WT** = wild type, **HUM** =  $\gamma$ -humulene(**3**) synthase,

*E*- $\beta$ -farnesene(**1**), sibirene(**2**), longifolene(**4**),  $\alpha$ -longipinene(**5**),  $\alpha$ -ylangene(**6**),  $\beta$ -bisabolene(**7**), and *Z,E*- $\alpha$ -farnesene (**8**)

Each product distribution was normalized to total of **1-7** product distribution as 100%

All product distributions were determined from triplicates, and standard deviations were lower than 2 %.

\*<sup>1</sup> The yield is the *in vivo* productivity of a particular compound by each mutant over that by the wild type enzyme.

\*<sup>2</sup> The starting product distribution used was represented as bold and italic

**Supplementary Table 5. Longifolene synthase construction**

| Clones<br>Generation | Mutations           | Product Distributions (%) |          |          |             |          |          |          | Yield* <sup>1</sup><br>(times) |
|----------------------|---------------------|---------------------------|----------|----------|-------------|----------|----------|----------|--------------------------------|
|                      |                     | <b>1</b>                  | <b>2</b> | <b>3</b> | <b>4</b>    | <b>5</b> | <b>6</b> | <b>7</b> |                                |
| WT                   | WT                  | 3.3                       | 26.1     | 36.1     | <b>16.4</b> | 6.1      | 5.6      | 3.3      | 1                              |
| 1                    | S484C               | 1.6                       | 1.6      | 13.7     | <b>59.6</b> | 16.3     | 3.6      | 3.6      | 2.6                            |
| 2                    | S484C, I562V        | 1.4                       | 1.2      | 13.1     | <b>62.6</b> | 14.5     | 3.8      | 3.5      | 2.7                            |
| 3 (LFN)              | A336S, S484C, I562V | 1.6                       | 1.3      | 9.3      | <b>64.7</b> | 15.0     | 3.9      | 4.2      | 1.9                            |

  

| Predicted<br>Clones | Mutations* <sup>2</sup>                           | Product Distributions (%) |          |          |             |          |          |          |
|---------------------|---------------------------------------------------|---------------------------|----------|----------|-------------|----------|----------|----------|
|                     |                                                   | <b>1</b>                  | <b>2</b> | <b>3</b> | <b>4</b>    | <b>5</b> | <b>6</b> | <b>7</b> |
| 2                   | <b><i>S484C</i></b> , I562V                       | 2.0                       | 1.5      | 10.3     | <b>58.8</b> | 13.1     | 3.1      | 11.2     |
| 3-1                 | A336S, <b><i>S484C</i></b> , I562V                | 1.3                       | 1.3      | 8.0      | <b>62.2</b> | 13.9     | 2.3      | 10.9     |
| 3-2                 | <b><i>A336S</i></b> , <b><i>S484C</i></b> , I562V | 0.9                       | 1.1      | 10.2     | <b>66.3</b> | 15.4     | 2.8      | 3.4      |

ND means "Production is not detected"

WT = wild type, LFN = longifolene(4) synthase,

*E*-β-farnesene(1), sibirene(2), γ-humulene(3), α-longipinene(5), α-ylangene(6), β-bisabolene(7), and *Z,E*-α-farnesene (8)

Each product distribution was normalized to total of 1-7 product distribution as 100%

All product distributions were determined from triplicates, and standard deviations were lower than 2 %.

\*<sup>1</sup> The yield is the *in vivo* productivity of a particular compound by each mutant over that by the wild type enzyme.

\*<sup>2</sup> The starting product distribution used was represented as bold and italic

**Supplementary Table 6.  $\alpha$ -longipinene synthase construction**

| Clone<br>Generation | Mutations                         | Product Distributions (%) |          |          |          |             |          |          | Yield* <sup>1</sup><br>(times) |
|---------------------|-----------------------------------|---------------------------|----------|----------|----------|-------------|----------|----------|--------------------------------|
|                     |                                   | <b>1</b>                  | <b>2</b> | <b>3</b> | <b>4</b> | <b>5</b>    | <b>6</b> | <b>7</b> |                                |
| WT                  | WT                                | 3.3                       | 26.1     | 36.1     | 16.4     | <b>6.1</b>  | 5.6      | 3.3      | 1                              |
| 1                   | S484C                             | 1.6                       | 1.6      | 13.7     | 59.6     | <b>16.3</b> | 3.6      | 3.6      | 2.6                            |
| 2-1                 | T445C, S484C                      | 2.5                       | 2.0      | 19.2     | 35.0     | <b>36.0</b> | 4.0      | 1.3      | 5.9                            |
| 2-2                 | S484C, I562L                      | 8.0                       | 1.1      | 8.3      | 42.2     | <b>34.5</b> | 3.0      | 2.9      | 8.5                            |
| 3                   | T445C, S484C, I562L               | 6.7                       | 1.1      | 13.8     | 19.1     | <b>54.8</b> | 2.5      | 2.1      | 6.9                            |
| 4-1                 | A336C, T445C, S484C, I562L        | 9.4                       | 1.2      | 11.5     | 18.5     | <b>53.7</b> | 2.0      | 3.5      | 14.7                           |
| 4-2                 | T445C, S484C, I562L, M565L        | 5.3                       | 0.7      | 12.2     | 13.6     | <b>63.0</b> | 3.3      | 1.9      | 10.7                           |
| 5 (ALP)             | A336C, T445C, S484C, I562L, M565L | 4.4                       | 0.5      | 9.7      | 13.6     | <b>66.3</b> | 2.6      | 2.9      | 11.7                           |

  

| Predicted<br>clone | Mutations* <sup>2</sup>                          | Predicted Product Distributions (%) |          |          |          |             |          |          |
|--------------------|--------------------------------------------------|-------------------------------------|----------|----------|----------|-------------|----------|----------|
|                    |                                                  | <b>1</b>                            | <b>2</b> | <b>3</b> | <b>4</b> | <b>5</b>    | <b>6</b> | <b>7</b> |
| 2-1                | T445C, <b><i>S484C</i></b>                       | 3.1                                 | 3.4      | 17.1     | 39.4     | <b>28.9</b> | 6.5      | 1.6      |
| 2-2                | <b><i>S484C</i></b> , I562L                      | 1.7                                 | 1.1      | 18.1     | 43.7     | <b>28.1</b> | 4.1      | 3.2      |
| 3                  | T445C, <b><i>S484C</i></b> , I562L               | 2.9                                 | 2.0      | 19.5     | 25.0     | <b>42.9</b> | 6.4      | 1.2      |
| 4-1                | A336C, T445C, <b><i>S484C</i></b> , I562L        | 1.4                                 | 1.6      | 15.6     | 21.0     | <b>54.7</b> | 4.7      | 1.0      |
| 4-2                | T445C, <b><i>S484C</i></b> , I562L, M565L        | 1.7                                 | 0.9      | 19.2     | 20.8     | <b>50.3</b> | 6.1      | 1.0      |
| 5                  | A336C, T445C, <b><i>S484C</i></b> , I562L, M565L | 0.8                                 | 0.7      | 14.9     | 16.8     | <b>61.8</b> | 4.3      | 0.8      |

ND means "Production is not detected"

WT = wild type, ALP =  $\alpha$ -longipinene(5) synthase,

*E*- $\beta$ -farnesene(1), sibirene(2),  $\gamma$ -humulene(3), longifolene(4),  $\alpha$ -ylangene(6),  $\beta$ -bisabolene(7), and *Z,E*- $\alpha$ -farnesene (8)

Each product distribution was normalized to total of 1-7 product distribution as 100%

All product distributions were determined from triplicates, and standard deviations were lower than 2 %.

\*<sup>1</sup> The yield is the *in vivo* productivity of a particular compound by each mutant over that by the wild type enzyme.

\*<sup>2</sup>The starting product distribution used was represented as bold and italic

**Supplementary Table 7.  $\alpha$ -ylangene synthase construction**

| Clones<br>Generation | Mutations                  | Product Distributions (%)           |          |          |          |          |             |          | Yield* <sup>1</sup><br>(times) |
|----------------------|----------------------------|-------------------------------------|----------|----------|----------|----------|-------------|----------|--------------------------------|
|                      |                            | <b>1</b>                            | <b>2</b> | <b>3</b> | <b>4</b> | <b>5</b> | <b>6</b>    | <b>7</b> |                                |
| WT                   | WT                         | 3.3                                 | 26.1     | 36.1     | 16.4     | 6.1      | <b>5.6</b>  | 3.3      | 1                              |
| 1                    | Y566F                      | 2.6                                 | 1.4      | 56.4     | 4.2      | 20.1     | <b>11.0</b> | 4.2      | 2.1                            |
| 2 (AYG)              | S484A, Y566F               | 3.0                                 | 0.5      | 55.6     | 3.7      | 17.2     | <b>12.7</b> | 7.3      | 2.0                            |
| Predicted<br>Clones  | Mutations* <sup>2</sup>    | Predicted Product Distributions (%) |          |          |          |          |             |          |                                |
|                      |                            | <b>1</b>                            | <b>2</b> | <b>3</b> | <b>4</b> | <b>5</b> | <b>6</b>    | <b>7</b> |                                |
| 2                    | S484A, <b><i>Y566F</i></b> | 2.9                                 | 0.6      | 58.7     | 3.6      | 17.4     | <b>9.8</b>  | 6.9      |                                |

ND means "Production is not detected"

**WT** = wild type, **AYG** =  $\alpha$ -ylangene(6)synthase,

*E*- $\beta$ -farnesene(**1**), sibirene(**2**),  $\gamma$ -humulene(**3**), longifolene(**4**),  $\alpha$ -longipinene(**5**),  $\beta$ -bisabolene(**7**), and *Z,E*- $\alpha$ -farnesene (**8**)

Each product distribution was normalized to total of **1-7** product distribution as 100%

All product distributions were determined from triplicates, and standard deviations were lower than 2 %.

\*<sup>1</sup> The yield is the *in vivo* productivity of a particular compound by each mutant over that by the wild type enzyme.

\*<sup>2</sup>The starting product distribution used was represented as bold and italic

**Supplementary Table 8. Primers used for saturation and site-directed mutagenesis**

| Name         | Sequences(5'→3')                           |
|--------------|--------------------------------------------|
| HUM-W312SatF | CGTAAATGCTATGTGGAANNNTACTTCTGGATGGCCGCG    |
| HUM-W312SatR | CGCGGCCATCCAGAAGTANNNTTCCACATAGCATTTACG    |
| HUM-W315SatF | TATGTGGAATTTTACTTCNNNATGGCCGCGGCAATTTCA    |
| HUM-W315SatR | TGAAATTGCCGCGGCCATNNNGAAGTAAAATTCACATA     |
| HUM-A336SatF | GTGGCATTCACTAAAATTNNNATCTTGATGACAATGTTA    |
| HUM-A336SatR | TAACATTGTCATCAAGATNNNAATTTTAGTGAATGCCAC    |
| HUM-M339SatF | ACTAAAATTGCGATCTTGNNNACAATGTTAGATGACTTA    |
| HUM-M339SatR | TAAGTCATCTAACATTGTNNNCAAGATCGCAATTTTAGT    |
| HUM-T340SatF | AAAATTGCGATCTTGATGNNNATGTTAGATGACTTATAC    |
| HUM-T340SatR | GTATAAGTCATCTAACATNNNCATCAAGATCGCAATTTT    |
| HUM-Y419SatF | GAACGCTATCTGGAAGCGNNNTTGCAGGATGCCGAATGG    |
| HUM-Y419SatR | CCATTCGGCATCCTGCAANNNGCCTTCCAGATAGCGTTC    |
| HUM-T445SatF | AACAATGGCACCCCAACNNNGGTATGTGTGTACTIONTAAAT |
| HUM-T445SatR | ATTAAGTACACACATAACNNNGTTGGGGGTGCCATTGTT    |
| HUM-G446SatF | AATGGCACCCCAACACNNNATGTGTGTACTIONTAAATCTG  |
| HUM-G446SatR | CAGATTAAGTACACACATNNNGGTGTTGGGGGTGCCATT    |
| HUM-M447SatF | GGCACCCCAACACCGGTNNNTGTGTACTIONTAAATCTGATC |
| HUM-M447SatR | GATCAGATTAAGTACACANNNACCGGTGTTGGGGGTGCC    |
| HUM-L450SatF | AACACCGGTATGTGTGTANNNAATCTGATCCCGTTGCTG    |
| HUM-L450SatR | CAGCAACGGGATCAGATTNNNTACACACATAACCGGTGTT   |
| HUM-S484SatF | CATCTGATTGAACTGGCTNNNCGACTGGTCGATGATGCG    |
| HUM-S484SatR | CGCATCATCGACCAGTCGNNNAGCCAGTTCAATCAGATG    |
| HUM-V487SatF | GAACTGGCTAGCCGACTGNNNGATGATGCGAGAGATTTT    |
| HUM-V487SatR | AAAATCTCTCGCATCATCNNNCAGTCGGCTAGCCAGTTC    |
| HUM-L558SatF | AAATACTCATTCCACGTCNNNGCGCGGTTCGATTCAGTTT   |
| HUM-L558SatR | AAACTGAATCGACCGCGCNNNGACGTGGAATGAGTATTT    |
| HUM-I562SatF | CACGTCCTGGCGCGGTGNNNCAGTTTATGTATAACCAG     |
| HUM-I562SatR | CTGGTTATACATAAACTGNNNCGACCGCGCCAGGACGTG    |
| HUM-M565SatF | GCGCGGTTCGATTCAGTTTNNNTATAACCAGGGGGACGGG   |
| HUM-M565SatR | CCCGTCCCCCTGGTTATANNNAAACTGAATCGACCGCGC    |
| HUM-Y566SatF | CGGTTCGATTCAGTTTATGNNNAACCAGGGGGACGGGTTT   |
| HUM-Y566SatR | AAACCCGTCCCCCTGGTTNNNCATAAACTGAATCGACCG    |
| HUM-D570SatF | TTTATGTATAACCAGGGGNNNGGGTTTTTCGATTTTGAAC   |
| HUM-D570SatR | GTTCGAAATCGAAAACCCNNNCCCCTGGTTATACATAAA    |
| HUM-F572SatF | TATAACCAGGGGGACGGNNNTCGATTTTGAACAAAGTT     |
| HUM-F572SatR | AACTTTGTTTCGAAATCGANNNCCCCTCCCCCTGGTTATA   |



|                 |                                                |
|-----------------|------------------------------------------------|
| HUM-Y573SatF    | AACCAGGGGGACGGGTTTNNNATTTTGAACAAAGTTATT        |
| HUM-Y573SatR    | AATAACTTTGTTCGAAATNNNAAACCCGTCCCCCTGGTT        |
| HUM-M565I/V/L-F | GCGCGGTTCGATTTCAGTTTTVTTTATAACCAGGGGGACGGG     |
| HUM-M565I/V/L-R | CCCGTCCCCCTGGTTATAAABAAACTGAATCGACCGCGC        |
| HUM-A336CF      | GTGGCATTCACTAAAATTTGCATCTTGATGACAATGTTA        |
| HUM-A336CR      | TAACATTGTCATCAAGATGCAAATTTTAGTGAATGCCAC        |
| HUM-T445CF      | CTGAACAATGGCACCCCCAACTGCGGTATGTGTGTAATCTG      |
| HUM-T445CR      | CAGATTAAGTACACACATACCGCAGTTGGGGGTGCCATTGTTTCAG |

---

All primers were purchased from OPERON.

**Supplementary Table 9. Primers used for  $\gamma$ -humulene synthase gene synthesis**

| Name     | Forward Sequence (5'→3')              |
|----------|---------------------------------------|
| HUMNcoIF | CATGCCATGGCTCAAATCAGCGAATCAGTGT       |
| HUM-F-01 | CTCCAAGCACCGACCTTAAAAGCACGGAATCTTCT   |
| HUM-F-02 | ATTACCAGCAACCGCCACGGTAACATGTGGGAAGA   |
| HUM-F-03 | TGACCGCATTTCAGAGCTTAAACAGCCCATATGGCG  |
| HUM-F-04 | CACCCGCTTATCAGGAACGTAGCGAAAAATTGATT   |
| HUM-F-05 | GAAGAAATTAAGCTCCTGTTTCTGTCCGATATGGA   |
| HUM-F-06 | CGATAGTTGCAATGATTTCGGATCGCGACTTGATCA  |
| HUM-F-07 | AACGCCTGGAGATCGTAGATACGGTTGAGTGTCTG   |
| HUM-F-08 | GGCATTGATCGTCATTTCCAACCTGAAATTAAGCT   |
| HUM-F-09 | GGCGCTGGATTACGTGTACCGTTGCTGGAATGAGC   |
| HUM-F-10 | GTGGCATCGGAGAAGGTAGCCGTGATAGCTTAAAA   |
| HUM-F-11 | AAGGACCTGAATGCGACCGCCTTGGGCTTTCGGGC   |
| HUM-F-12 | TTTACGCTTACACCGTTATAATGTAAGCTCAGGAG   |
| HUM-F-13 | TGCTGGAGAACTTCCGTGATGACAATGGTCAATTC   |
| HUM-F-14 | TTTTGCGGTTCTACTGTGGAGGAGGAAGGCGCGGA   |
| HUM-F-15 | GGCCTACAATAAACATGTACGTTGCATGCTGTCCC   |
| HUM-F-16 | TGTCCC GCGCTTCCAATATTTTATTTCCCGGGCGAG |
| HUM-F-17 | AAAGTGATGGAAGAAGCGAAGGCGTTTACGACCAA   |
| HUM-F-18 | CTATCTTAAGAAAGTCCTGGCGGGTTCGTGAAGCAA  |
| HUM-F-19 | CTCATGTCGACGAGAGTCTCCTTGGAGAGGTCAAG   |
| HUM-F-20 | TATGCACTAGAATTTCCGTGGCATTGTTCCGTGCA   |
| HUM-F-21 | GCGCTGGGAGGCACGTTCTTTTATCGAAATTTTCG   |
| HUM-F-22 | GTCAGATTGATAGTGAAGTGAAGCAACCTCTCT     |
| HUM-F-23 | AAAAAAATGCTCGAACTCGCAAACTTGATTTTAA    |
| HUM-F-24 | CATACTCCAGTGTACGCATCAAAAAGAGCTCCAGA   |
| HUM-F-25 | TCATTAGTCGATGGTTCGCCGATTCAAGTATCGCA   |
| HUM-F-26 | AGTCTGAACTTTTACCGTAAATGCTATGTGGAATT   |
| HUM-F-27 | TTACTTCTGGATGGCCGCGGCAATTTTCAGAACCAG  |
| HUM-F-28 | AATTTAGTGGCTCTCGCGTGGCATTCACTAAAATT   |
| HUM-F-29 | GCGATCTTGATGACAATGTTAGATGACTTATACGA   |
| HUM-F-30 | CACGCATGGGACGCTGGATCAATTGAAAATATTTA   |
| HUM-F-31 | CCGAAGGTGTGCGCAGGTGGGACGTGTGCGTGGTG   |
| HUM-F-32 | GAGGGCCTGCCGGATTTTCATGAAAATTGCCTTTGA  |
| HUM-F-33 | GTTCTGGTTAAAGACCTCCAACGAACTGATTGCGG   |
| HUM-F-34 | AGGCGGTTAAGGCCCAAGGCCAGGATATGGCGGCC   |
| HUM-F-35 | TATATCCGCAAAAACGCTTGGGAACGCTATCTGGA   |

|          |                                      |
|----------|--------------------------------------|
| HUM-F-36 | AGCGTATTTGCAGGATGCCGAATGGATCGCCACCG  |
| HUM-F-37 | GTCACGTTCCGACATTCGATGAATATCTGAACAAT  |
| HUM-F-38 | GGCACCCCCAACACCGGTATGTGTGTACTTAATCT  |
| HUM-F-39 | GATCCCGTTGCTGCTTATGGGCGAACACTTGCCGA  |
| HUM-F-40 | TCGATATTCTTGAACAGATCTTTCTGCCGAGCCGG  |
| HUM-F-41 | TTCCACCATCTGATTGAACTGGCTAGCCGACTGGT  |
| HUM-F-42 | CGATGATGCGAGAGATTTTCAAGCCGAAAAAGATC  |
| HUM-F-43 | ATGGTGATTTATCCTGCATCGAATGCTACCTGAAA  |
| HUM-F-44 | GACCATCCGGAATCAACAGTTGAAGACGCCCTGAA  |
| HUM-F-45 | TCACGTCAACGGCCTGCTGGGGAATTGTTTGCTGG  |
| HUM-F-46 | AAATGAAATTGGAAATTTCTGAAAAAACAGGACTCG |
| HUM-F-47 | GTACCTCTGTCGTGTAAAAATACTCATTTCCACGT  |
| HUM-F-48 | CCTGGCGCGGTTCGATTCAGTTTATGTATAACCAGG |
| HUM-F-49 | GGGACGGGTTTTTCGATTTTCGAACAAAGTTATTA  |
| HUM-F-50 | GACCAGGTCCAGAAAGTTCTAATCGTTCCGGTTCC  |

| <b>Name</b> | <b>Reverse sequence (5'→3')</b>      |
|-------------|--------------------------------------|
| hum-R-1     | AAGGTCGGTGCTTGGAGACACTGATTCGCTGATTT  |
| hum-R-2     | TGGCGGTTGCTGGTAATAGAAGATTCCGTGCTTTT  |
| hum-R-3     | AGCTCTGAATGCGGTCATCTTCCCACATGTTACCG  |
| hum-R-4     | TTCTTGATAAGCGGGTGCGCCATATGGGCTGTTTA  |
| hum-R-5     | AGGAGCTTAATTTCTTCAATCAATTTTTTCGCTACG |
| hum-R-6     | AATCATTTGCAACTATCGTCCATATCGGACAGAAAC |
| hum-R-7     | TACGATCTCCAGGCGTTTGATCAAGTCGCGATCCG  |
| hum-R-8     | AAATGACGATCAATGCCAGACACTCAACCGTATC   |
| hum-R-9     | ACACGTAATCCAGCGCCAGCTTAATTTTCAGGTTGG |
| hum-R-10    | ACCTTCTCCGATGCCACGCTCATTTCCAGCAACGGT |
| hum-R-11    | GTCGCATTCAGGTCTTTTTTTAAGCTATCACGGCT  |
| hum-R-12    | AACGGTGTAAGCGTAAAGCCCGAAAGCCCAAGGCG  |
| hum-R-13    | ACGGAAGTTCTCCAGCACTCCTGAGCTTACATTAT  |
| hum-R-14    | ACAGTAGAACCGCAAAAGAATTGACCATTGTCATC  |
| hum-R-15    | CATGTTTATTGTAGGCTCCGCGCCTTCTCCTCC    |
| hum-R-16    | ATTGGAAGCGCGGGACAGGGACAGCATGCAACGTA  |
| hum-R-17    | GCTTCTTCCATCACTTTCTCGCCCGGGAATAAAAT  |
| hum-R-18    | GGACTTTCTTAAGATAGTTGGTCGTAAACGCCTTC  |
| hum-R-19    | ACTCTCGTCGACATGAGTTGCTTCACGACCCGCCA  |
| hum-R-20    | GGAAATTCTAGTGCATACTTGACCTCTCCAAGGAG  |
| hum-R-21    | AACGTGCCTCCCAGCGCTGCACGGAACAATGCCAC  |
| hum-R-22    | TTCACTATCAATCTGACCGAAAATTTTCGATAAAAG |

|          |                                       |
|----------|---------------------------------------|
| hum-R-23 | AGTTCGAGCATTTTTTTTAGAGAGGTTGCTTTTCAG  |
| hum-R-24 | GCGTACACTGGAGTATGTTAAAATCAAGTTTTGCG   |
| hum-R-25 | GAACCATCGACTAATGATCTGGAGCTCTTTTTGAT   |
| hum-R-26 | CGGTAAAAGTTCAGACTTGCATACTTGAATCGGC    |
| hum-R-27 | CGGCCATCCAGAAGTAAAATTCCACATAGCATTTA   |
| hum-R-28 | GCGAGAGCCACTAAATTCTGGTCTGAAATTGCCG    |
| hum-R-29 | ATTGTCATCAAGATCGCAATTTTAGTGAATGCCAC   |
| hum-R-30 | CCAGCGTCCCATGCGTGTCGTATAAGTCATCTAAC   |
| hum-R-31 | CCTGCGCACACCTTCGGTAAATATTTTCAATTGAT   |
| hum-R-32 | AAATCCGGCAGGCCCTCCACCAGCGACACGTCCCA   |
| hum-R-33 | AGGTCTTTAACCAGAACTCAAAGGCAATTTTCATG   |
| hum-R-34 | TTGGGCCTTAACCGCCTCCGCAATCAGTTCGTTGG   |
| hum-R-35 | GCGTTTTTGC GGATATAGGCCGCCATATCCTGGCC  |
| hum-R-36 | CATCCTGCAAATACGCTTCCAGATAGCGTTCCCAA   |
| hum-R-37 | GAAATGTCGGAACGTGACCGGTGGCGATCCATTCGG  |
| hum-R-38 | CCGGTGTGGGGGTGCCATTGTTTCAGATATTCATC   |
| hum-R-39 | TAAGCAGCAACGGGATCAGATTAAGTACACACATA   |
| hum-R-40 | CTGTTCAAGAAATATCGATCGGCAAGTGTTCGCCCA  |
| hum-R-41 | TCAATCAGATGGTGGAAACCGGCTCGGCAGAAAGAT  |
| hum-R-42 | AATCTCTCGCATCATCGACCAGTCGGCTAGCCAGT   |
| hum-R-43 | GCAGGATAAAATCACCATGATCTTTTTTCGGCTTGAA |
| hum-R-44 | GTTGATTCCGGATGGTCTTTCAGGTAGCATTCGAT   |
| hum-R-45 | GCAGGCCGTTGACGTGATTTCAGGGCGTCTTCAACT  |
| hum-R-46 | AAATTTCCAATTCAATTTCCAGCAAACAATTCCCCA  |
| hum-R-47 | TTACACGACAGAGGTACCGAGTCTGTTTTTTTCAG   |
| hum-R-48 | GAAATCGACCGCGCCAGGACGTGGAATGAGTATTTT  |
| hum-R-49 | AATCGAAAACCCGTCCCCCTGGTTATACATAAACT   |
| hum-R-50 | ACTTTCTGGACCTGGTCTTTAATAACTTTGTTCGA   |
| humXbaIR | GCTCTAGATTATATAGGAACCGGAACGATTAGA     |

---

All primers were purchased from OPERON.
