# Supplementary material for: Designed divergent evolution of enzyme function
Source: Springer Nature journal article supplement (doi:10.1038/nature04607), 2006-02-22
Supplement: 41586_2006_BFnature04607_MOESM3_ESM.pdf [file 41586_2006_BFnature04607_MOESM3_ESM.pdf]

## Supplementary material 1.txt

| EXPDTA | MODEL    | MODELLER  | Version   | 6v2       | 2002/09/07 | 15:09:35.216 |        |      |        |     |    |
|--------|----------|-----------|-----------|-----------|------------|--------------|--------|------|--------|-----|----|
| REMARK | MODELLER | OBJECTIVE | FUNCTION: | 3215.4875 |            |              |        |      |        |     |    |
| ATOM   | 1        | N         | MET       | 1         | 100.386    | 62.875       | 55.401 | 1.00 | 78.92  | 1SG | 2  |
| ATOM   | 2        | CA        | MET       | 1         | 100.695    | 61.441       | 55.212 | 1.00 | 78.92  | 1SG | 3  |
| ATOM   | 3        | CB        | MET       | 1         | 101.458    | 61.231       | 53.894 | 1.00 | 78.92  | 1SG | 4  |
| ATOM   | 4        | CG        | MET       | 1         | 100.655    | 61.667       | 52.668 | 1.00 | 78.92  | 1SG | 5  |
| ATOM   | 5        | SD        | MET       | 1         | 101.490    | 61.428       | 51.072 | 1.00 | 78.92  | 1SG | 6  |
| ATOM   | 6        | CE        | MET       | 1         | 100.223    | 62.319       | 50.124 | 1.00 | 78.92  | 1SG | 7  |
| ATOM   | 7        | C         | MET       | 1         | 101.566    | 60.972       | 56.326 | 1.00 | 78.92  | 1SG | 8  |
| ATOM   | 8        | O         | MET       | 1         | 102.777    | 61.183       | 56.311 | 1.00 | 78.92  | 1SG | 9  |
| ATOM   | 9        | N         | ALA       | 2         | 100.959    | 60.340       | 57.345 | 1.00 | 210.12 | 1SG | 10 |
| ATOM   | 10       | CA        | ALA       | 2         | 101.742    | 59.856       | 58.439 | 1.00 | 210.12 | 1SG | 11 |
| ATOM   | 11       | CB        | ALA       | 2         | 100.926    | 59.595       | 59.717 | 1.00 | 210.12 | 1SG | 12 |
| ATOM   | 12       | C         | ALA       | 2         | 102.364    | 58.569       | 58.011 | 1.00 | 210.12 | 1SG | 13 |
| ATOM   | 13       | O         | ALA       | 2         | 101.858    | 57.884       | 57.123 | 1.00 | 210.12 | 1SG | 14 |
| ATOM   | 14       | N         | GLN       | 3         | 103.513    | 58.222       | 58.620 | 1.00 | 238.96 | 1SG | 15 |
| ATOM   | 15       | CA        | GLN       | 3         | 104.147    | 56.985       | 58.283 | 1.00 | 238.96 | 1SG | 16 |
| ATOM   | 16       | CB        | GLN       | 3         | 105.525    | 57.153       | 57.624 | 1.00 | 238.96 | 1SG | 17 |
| ATOM   | 17       | CG        | GLN       | 3         | 105.470    | 57.879       | 56.279 | 1.00 | 238.96 | 1SG | 18 |
| ATOM   | 18       | CD        | GLN       | 3         | 106.883    | 57.928       | 55.715 | 1.00 | 238.96 | 1SG | 19 |
| ATOM   | 19       | OE1       | GLN       | 3         | 107.815    | 57.373       | 56.295 | 1.00 | 238.96 | 1SG | 20 |
| ATOM   | 20       | NE2       | GLN       | 3         | 107.049    | 58.603       | 54.546 | 1.00 | 238.96 | 1SG | 21 |
| ATOM   | 21       | C         | GLN       | 3         | 104.353    | 56.251       | 59.565 | 1.00 | 238.96 | 1SG | 22 |
| ATOM   | 22       | O         | GLN       | 3         | 104.569    | 56.860       | 60.611 | 1.00 | 238.96 | 1SG | 23 |
| ATOM   | 23       | N         | ILE       | 4         | 104.270    | 54.909       | 59.525 | 1.00 | 126.58 | 1SG | 24 |
| ATOM   | 24       | CA        | ILE       | 4         | 104.446    | 54.185       | 60.745 | 1.00 | 126.58 | 1SG | 25 |
| ATOM   | 25       | CB        | ILE       | 4         | 104.256    | 52.707       | 60.556 | 1.00 | 126.58 | 1SG | 26 |
| ATOM   | 26       | CG2       | ILE       | 4         | 104.649    | 51.990       | 61.858 | 1.00 | 126.58 | 1SG | 27 |
| ATOM   | 27       | CG1       | ILE       | 4         | 102.813    | 52.420       | 60.104 | 1.00 | 126.58 | 1SG | 28 |
| ATOM   | 28       | CD1       | ILE       | 4         | 102.589    | 50.998       | 59.588 | 1.00 | 126.58 | 1SG | 29 |
| ATOM   | 29       | C         | ILE       | 4         | 105.844    | 54.429       | 61.211 | 1.00 | 126.58 | 1SG | 30 |
| ATOM   | 30       | O         | ILE       | 4         | 106.060    | 54.852       | 62.347 | 1.00 | 126.58 | 1SG | 31 |
| ATOM   | 31       | N         | SER       | 5         | 106.837    | 54.198       | 60.330 | 1.00 | 98.97  | 1SG | 32 |
| ATOM   | 32       | CA        | SER       | 5         | 108.197    | 54.471       | 60.692 | 1.00 | 98.97  | 1SG | 33 |
| ATOM   | 33       | CB        | SER       | 5         | 108.617    | 53.906       | 62.058 | 1.00 | 98.97  | 1SG | 34 |
| ATOM   | 34       | OG        | SER       | 5         | 109.974    | 54.233       | 62.317 | 1.00 | 98.97  | 1SG | 35 |
| ATOM   | 35       | C         | SER       | 5         | 109.071    | 53.829       | 59.672 | 1.00 | 98.97  | 1SG | 36 |
| ATOM   | 36       | O         | SER       | 5         | 108.685    | 52.838       | 59.055 | 1.00 | 98.97  | 1SG | 37 |
| ATOM   | 37       | N         | GLU       | 6         | 110.286    | 54.375       | 59.475 | 1.00 | 66.59  | 1SG | 38 |
| ATOM   | 38       | CA        | GLU       | 6         | 111.170    | 53.817       | 58.496 | 1.00 | 66.59  | 1SG | 39 |
| ATOM   | 39       | CB        | GLU       | 6         | 112.484    | 54.605       | 58.383 | 1.00 | 66.59  | 1SG | 40 |
| ATOM   | 40       | CG        | GLU       | 6         | 112.297    | 56.014       | 57.820 | 1.00 | 66.59  | 1SG | 41 |
| ATOM   | 41       | CD        | GLU       | 6         | 113.623    | 56.741       | 57.970 | 1.00 | 66.59  | 1SG | 42 |
| ATOM   | 42       | OE1       | GLU       | 6         | 114.545    | 56.153       | 58.595 | 1.00 | 66.59  | 1SG | 43 |
| ATOM   | 43       | OE2       | GLU       | 6         | 113.731    | 57.894       | 57.471 | 1.00 | 66.59  | 1SG | 44 |
| ATOM   | 44       | C         | GLU       | 6         | 111.507    | 52.414       | 58.898 | 1.00 | 66.59  | 1SG | 45 |
| ATOM   | 45       | O         | GLU       | 6         | 111.272    | 51.469       | 58.149 | 1.00 | 66.59  | 1SG | 46 |
| ATOM   | 46       | N         | SER       | 7         | 112.070    | 52.247       | 60.107 | 1.00 | 156.47 | 1SG | 47 |
| ATOM   | 47       | CA        | SER       | 7         | 112.336    | 50.954       | 60.671 | 1.00 | 156.47 | 1SG | 48 |
| ATOM   | 48       | CB        | SER       | 7         | 111.052    | 50.199       | 61.053 | 1.00 | 156.47 | 1SG | 49 |
| ATOM   | 49       | OG        | SER       | 7         | 110.342    | 50.923       | 62.049 | 1.00 | 156.47 | 1SG | 50 |
| ATOM   | 50       | C         | SER       | 7         | 113.124    | 50.088       | 59.730 | 1.00 | 156.47 | 1SG | 51 |
| ATOM   | 51       | O         | SER       | 7         | 113.081    | 48.864       | 59.856 | 1.00 | 156.47 | 1SG | 52 |
| ATOM   | 52       | N         | VAL       | 8         | 113.885    | 50.664       | 58.778 | 1.00 | 110.72 | 1SG | 53 |
| ATOM   | 53       | CA        | VAL       | 8         | 114.665    | 49.812       | 57.922 | 1.00 | 110.72 | 1SG | 54 |
| ATOM   | 54       | CB        | VAL       | 8         | 114.363    | 49.983       | 56.461 | 1.00 | 110.72 | 1SG | 55 |
| ATOM   | 55       | CG1       | VAL       | 8         | 114.723    | 51.420       | 56.044 | 1.00 | 110.72 | 1SG | 56 |
| ATOM   | 56       | CG2       | VAL       | 8         | 115.125    | 48.902       | 55.676 | 1.00 | 110.72 | 1SG | 57 |
| ATOM   | 57       | C         | VAL       | 8         | 116.097    | 50.173       | 58.128 | 1.00 | 110.72 | 1SG | 58 |
| ATOM   | 58       | O         | VAL       | 8         | 116.439    | 51.350       | 58.226 | 1.00 | 110.72 | 1SG | 59 |
| ATOM   | 59       | N         | SER       | 9         | 116.979    | 49.157       | 58.209 | 1.00 | 38.37  | 1SG | 60 |
| ATOM   | 60       | CA        | SER       | 9         | 118.364    | 49.450       | 58.423 | 1.00 | 38.37  | 1SG | 61 |
| ATOM   | 61       | CB        | SER       | 9         | 119.220    | 48.217       | 58.761 | 1.00 | 38.37  | 1SG | 62 |
| ATOM   | 62       | OG        | SER       | 9         | 119.275    | 47.335       | 57.650 | 1.00 | 38.37  | 1SG | 63 |
| ATOM   | 63       | C         | SER       | 9         | 118.885    | 50.044       | 57.163 | 1.00 | 38.37  | 1SG | 64 |
| ATOM   | 64       | O         | SER       | 9         | 118.583    | 49.600       | 56.055 | 1.00 | 38.37  | 1SG | 65 |
| ATOM   | 65       | N         | PRO       | 10        | 119.656    | 51.070       | 57.333 | 1.00 | 100.34 | 1SG | 66 |
| ATOM   | 66       | CA        | PRO       | 10        | 120.201    | 51.741       | 56.196 | 1.00 | 100.34 | 1SG | 67 |
| ATOM   | 67       | CD        | PRO       | 10        | 119.468    | 51.969       | 58.457 | 1.00 | 100.34 | 1SG | 68 |
| ATOM   | 68       | CB        | PRO       | 10        | 120.503    | 53.174       | 56.643 | 1.00 | 100.34 | 1SG | 69 |
| ATOM   | 69       | CG        | PRO       | 10        | 120.442    | 53.121       | 58.178 | 1.00 | 100.34 | 1SG | 70 |

## Supplementary material 1.txt

|      |     |     |     |    |         |        |        |            |     |     |
|------|-----|-----|-----|----|---------|--------|--------|------------|-----|-----|
| ATOM | 70  | C   | PRO | 10 | 121.383 | 51.034 | 55.654 | 1.00100.34 | 1SG | 71  |
| ATOM | 71  | O   | PRO | 10 | 122.032 | 50.272 | 56.367 | 1.00100.34 | 1SG | 72  |
| ATOM | 72  | N   | SER | 11 | 121.633 | 51.239 | 54.359 | 1.00209.78 | 1SG | 73  |
| ATOM | 73  | CA  | SER | 11 | 122.834 | 50.780 | 53.759 | 1.00209.78 | 1SG | 74  |
| ATOM | 74  | CB  | SER | 11 | 122.777 | 51.059 | 52.277 | 1.00209.78 | 1SG | 75  |
| ATOM | 75  | OG  | SER | 11 | 121.535 | 50.587 | 51.812 | 1.00209.78 | 1SG | 76  |
| ATOM | 76  | C   | SER | 11 | 123.843 | 51.724 | 54.344 | 1.00209.78 | 1SG | 77  |
| ATOM | 77  | O   | SER | 11 | 124.987 | 51.377 | 54.605 | 1.00209.78 | 1SG | 78  |
| ATOM | 78  | N   | THR | 12 | 123.394 | 52.957 | 54.649 | 1.00149.24 | 1SG | 79  |
| ATOM | 79  | CA  | THR | 12 | 124.288 | 54.006 | 55.048 | 1.00149.24 | 1SG | 80  |
| ATOM | 80  | CB  | THR | 12 | 123.655 | 55.367 | 54.871 | 1.00149.24 | 1SG | 81  |
| ATOM | 81  | OG1 | THR | 12 | 123.079 | 55.438 | 53.574 | 1.00149.24 | 1SG | 82  |
| ATOM | 82  | CG2 | THR | 12 | 124.739 | 56.463 | 54.930 | 1.00149.24 | 1SG | 83  |
| ATOM | 83  | C   | THR | 12 | 124.711 | 53.779 | 56.479 | 1.00149.24 | 1SG | 84  |
| ATOM | 84  | O   | THR | 12 | 124.803 | 52.639 | 56.935 | 1.00149.24 | 1SG | 85  |
| ATOM | 85  | N   | ASP | 13 | 124.972 | 54.873 | 57.223 | 1.00195.40 | 1SG | 86  |
| ATOM | 86  | CA  | ASP | 13 | 125.539 | 54.894 | 58.543 | 1.00195.40 | 1SG | 87  |
| ATOM | 87  | CB  | ASP | 13 | 125.996 | 56.316 | 58.950 | 1.00195.40 | 1SG | 88  |
| ATOM | 88  | CG  | ASP | 13 | 126.978 | 56.275 | 60.117 | 1.00195.40 | 1SG | 89  |
| ATOM | 89  | OD1 | ASP | 13 | 127.713 | 55.261 | 60.256 | 1.00195.40 | 1SG | 90  |
| ATOM | 90  | OD2 | ASP | 13 | 126.992 | 57.262 | 60.902 | 1.00195.40 | 1SG | 91  |
| ATOM | 91  | C   | ASP | 13 | 124.518 | 54.409 | 59.524 | 1.00195.40 | 1SG | 92  |
| ATOM | 92  | O   | ASP | 13 | 123.571 | 53.715 | 59.154 | 1.00195.40 | 1SG | 93  |
| ATOM | 93  | N   | LEU | 14 | 124.707 | 54.771 | 60.811 | 1.00234.76 | 1SG | 94  |
| ATOM | 94  | CA  | LEU | 14 | 123.906 | 54.288 | 61.894 | 1.00234.76 | 1SG | 95  |
| ATOM | 95  | CB  | LEU | 14 | 124.200 | 54.971 | 63.240 | 1.00234.76 | 1SG | 96  |
| ATOM | 96  | CG  | LEU | 14 | 125.623 | 54.672 | 63.752 | 1.00234.76 | 1SG | 97  |
| ATOM | 97  | CD2 | LEU | 14 | 125.797 | 55.042 | 65.227 | 1.00234.76 | 1SG | 98  |
| ATOM | 98  | CD1 | LEU | 14 | 126.689 | 55.331 | 62.876 | 1.00234.76 | 1SG | 99  |
| ATOM | 99  | C   | LEU | 14 | 122.469 | 54.443 | 61.546 | 1.00234.76 | 1SG | 100 |
| ATOM | 100 | O   | LEU | 14 | 122.051 | 55.404 | 60.901 | 1.00234.76 | 1SG | 101 |
| ATOM | 101 | N   | LYS | 15 | 121.698 | 53.422 | 61.954 | 1.00160.87 | 1SG | 102 |
| ATOM | 102 | CA  | LYS | 15 | 120.332 | 53.237 | 61.584 | 1.00160.87 | 1SG | 103 |
| ATOM | 103 | CB  | LYS | 15 | 119.783 | 51.897 | 62.100 | 1.00160.87 | 1SG | 104 |
| ATOM | 104 | CG  | LYS | 15 | 118.357 | 51.596 | 61.642 | 1.00160.87 | 1SG | 105 |
| ATOM | 105 | CD  | LYS | 15 | 117.981 | 50.116 | 61.750 | 1.00160.87 | 1SG | 106 |
| ATOM | 106 | CE  | LYS | 15 | 118.073 | 49.547 | 63.168 | 1.00160.87 | 1SG | 107 |
| ATOM | 107 | NZ  | LYS | 15 | 116.786 | 49.732 | 63.875 | 1.00160.87 | 1SG | 108 |
| ATOM | 108 | C   | LYS | 15 | 119.431 | 54.336 | 62.046 | 1.00160.87 | 1SG | 109 |
| ATOM | 109 | O   | LYS | 15 | 118.657 | 54.847 | 61.238 | 1.00160.87 | 1SG | 110 |
| ATOM | 110 | N   | SER | 16 | 119.478 | 54.776 | 63.319 | 1.00229.10 | 1SG | 111 |
| ATOM | 111 | CA  | SER | 16 | 118.431 | 55.726 | 63.554 | 1.00229.10 | 1SG | 112 |
| ATOM | 112 | CB  | SER | 16 | 117.057 | 55.030 | 63.652 | 1.00229.10 | 1SG | 113 |
| ATOM | 113 | OG  | SER | 16 | 116.019 | 55.971 | 63.877 | 1.00229.10 | 1SG | 114 |
| ATOM | 114 | C   | SER | 16 | 118.635 | 56.517 | 64.812 | 1.00229.10 | 1SG | 115 |
| ATOM | 115 | O   | SER | 16 | 119.483 | 56.217 | 65.650 | 1.00229.10 | 1SG | 116 |
| ATOM | 116 | N   | THR | 17 | 117.842 | 57.605 | 64.907 | 1.00270.77 | 1SG | 117 |
| ATOM | 117 | CA  | THR | 17 | 117.701 | 58.489 | 66.028 | 1.00270.77 | 1SG | 118 |
| ATOM | 118 | CB  | THR | 17 | 118.625 | 59.669 | 66.024 | 1.00270.77 | 1SG | 119 |
| ATOM | 119 | OG1 | THR | 17 | 118.389 | 60.486 | 64.887 | 1.00270.77 | 1SG | 120 |
| ATOM | 120 | CG2 | THR | 17 | 120.072 | 59.161 | 66.038 | 1.00270.77 | 1SG | 121 |
| ATOM | 121 | C   | THR | 17 | 116.315 | 59.033 | 65.891 | 1.00270.77 | 1SG | 122 |
| ATOM | 122 | O   | THR | 17 | 115.520 | 58.505 | 65.115 | 1.00270.77 | 1SG | 123 |
| ATOM | 123 | N   | GLU | 18 | 115.962 | 60.087 | 66.652 | 1.00157.85 | 1SG | 124 |
| ATOM | 124 | CA  | GLU | 18 | 114.653 | 60.631 | 66.447 | 1.00157.85 | 1SG | 125 |
| ATOM | 125 | CB  | GLU | 18 | 114.328 | 61.825 | 67.360 | 1.00157.85 | 1SG | 126 |
| ATOM | 126 | CG  | GLU | 18 | 112.834 | 62.160 | 67.386 | 1.00157.85 | 1SG | 127 |
| ATOM | 127 | CD  | GLU | 18 | 112.116 | 61.044 | 68.140 | 1.00157.85 | 1SG | 128 |
| ATOM | 128 | OE1 | GLU | 18 | 112.819 | 60.178 | 68.726 | 1.00157.85 | 1SG | 129 |
| ATOM | 129 | OE2 | GLU | 18 | 110.855 | 61.042 | 68.140 | 1.00157.85 | 1SG | 130 |
| ATOM | 130 | C   | GLU | 18 | 114.668 | 61.114 | 65.036 | 1.00157.85 | 1SG | 131 |
| ATOM | 131 | O   | GLU | 18 | 113.732 | 60.885 | 64.274 | 1.00157.85 | 1SG | 132 |
| ATOM | 132 | N   | SER | 19 | 115.773 | 61.789 | 64.663 | 1.00194.78 | 1SG | 133 |
| ATOM | 133 | CA  | SER | 19 | 116.010 | 62.212 | 63.315 | 1.00194.78 | 1SG | 134 |
| ATOM | 134 | CB  | SER | 19 | 115.560 | 61.199 | 62.247 | 1.00194.78 | 1SG | 135 |
| ATOM | 135 | OG  | SER | 19 | 116.328 | 60.008 | 62.353 | 1.00194.78 | 1SG | 136 |
| ATOM | 136 | C   | SER | 19 | 115.346 | 63.522 | 63.045 | 1.00194.78 | 1SG | 137 |
| ATOM | 137 | O   | SER | 19 | 114.518 | 64.004 | 63.817 | 1.00194.78 | 1SG | 138 |
| ATOM | 138 | N   | SER | 20 | 115.745 | 64.133 | 61.910 | 1.00182.91 | 1SG | 139 |
| ATOM | 139 | CA  | SER | 20 | 115.223 | 65.376 | 61.426 | 1.00182.91 | 1SG | 140 |
| ATOM | 140 | CB  | SER | 20 | 116.060 | 66.602 | 61.838 | 1.00182.91 | 1SG | 141 |

## Supplementary material 1.txt

|      |     |     |     |    |         |        |        |            |     |     |
|------|-----|-----|-----|----|---------|--------|--------|------------|-----|-----|
| ATOM | 141 | OG  | SER | 20 | 115.479 | 67.796 | 61.334 | 1.00182.91 | 1SG | 142 |
| ATOM | 142 | C   | SER | 20 | 115.290 | 65.243 | 59.937 | 1.00182.91 | 1SG | 143 |
| ATOM | 143 | O   | SER | 20 | 115.599 | 64.166 | 59.431 | 1.00182.91 | 1SG | 144 |
| ATOM | 144 | N   | ILE | 21 | 114.992 | 66.316 | 59.179 | 1.0076.89  | 1SG | 145 |
| ATOM | 145 | CA  | ILE | 21 | 115.032 | 66.152 | 57.756 | 1.0076.89  | 1SG | 146 |
| ATOM | 146 | CB  | ILE | 21 | 113.998 | 66.967 | 57.032 | 1.0076.89  | 1SG | 147 |
| ATOM | 147 | CG2 | ILE | 21 | 114.274 | 66.869 | 55.522 | 1.0076.89  | 1SG | 148 |
| ATOM | 148 | CG1 | ILE | 21 | 112.585 | 66.512 | 57.436 | 1.0076.89  | 1SG | 149 |
| ATOM | 149 | CD1 | ILE | 21 | 111.475 | 67.428 | 56.923 | 1.0076.89  | 1SG | 150 |
| ATOM | 150 | C   | ILE | 21 | 116.374 | 66.600 | 57.281 | 1.0076.89  | 1SG | 151 |
| ATOM | 151 | O   | ILE | 21 | 116.703 | 67.785 | 57.322 | 1.0076.89  | 1SG | 152 |
| ATOM | 152 | N   | THR | 22 | 117.192 | 65.626 | 56.835 | 1.00264.57 | 1SG | 153 |
| ATOM | 153 | CA  | THR | 22 | 118.500 | 65.904 | 56.327 | 1.00264.57 | 1SG | 154 |
| ATOM | 154 | CB  | THR | 22 | 119.592 | 65.735 | 57.345 | 1.00264.57 | 1SG | 155 |
| ATOM | 155 | OG1 | THR | 22 | 119.635 | 64.393 | 57.807 | 1.00264.57 | 1SG | 156 |
| ATOM | 156 | CG2 | THR | 22 | 119.328 | 66.694 | 58.519 | 1.00264.57 | 1SG | 157 |
| ATOM | 157 | C   | THR | 22 | 118.752 | 64.923 | 55.230 | 1.00264.57 | 1SG | 158 |
| ATOM | 158 | O   | THR | 22 | 117.964 | 64.001 | 55.014 | 1.00264.57 | 1SG | 159 |
| ATOM | 159 | N   | SER | 23 | 119.860 | 65.111 | 54.490 | 1.00210.73 | 1SG | 160 |
| ATOM | 160 | CA  | SER | 23 | 120.148 | 64.198 | 53.426 | 1.00210.73 | 1SG | 161 |
| ATOM | 161 | CB  | SER | 23 | 120.017 | 64.819 | 52.024 | 1.00210.73 | 1SG | 162 |
| ATOM | 162 | OG  | SER | 23 | 120.320 | 63.846 | 51.035 | 1.00210.73 | 1SG | 163 |
| ATOM | 163 | C   | SER | 23 | 121.565 | 63.754 | 53.584 | 1.00210.73 | 1SG | 164 |
| ATOM | 164 | O   | SER | 23 | 122.388 | 64.441 | 54.190 | 1.00210.73 | 1SG | 165 |
| ATOM | 165 | N   | ASN | 24 | 121.876 | 62.558 | 53.050 | 1.00248.18 | 1SG | 166 |
| ATOM | 166 | CA  | ASN | 24 | 123.209 | 62.043 | 53.113 | 1.00248.18 | 1SG | 167 |
| ATOM | 167 | CB  | ASN | 24 | 123.366 | 60.836 | 54.052 | 1.00248.18 | 1SG | 168 |
| ATOM | 168 | CG  | ASN | 24 | 122.511 | 59.709 | 53.493 | 1.00248.18 | 1SG | 169 |
| ATOM | 169 | OD1 | ASN | 24 | 121.323 | 59.891 | 53.230 | 1.00248.18 | 1SG | 170 |
| ATOM | 170 | ND2 | ASN | 24 | 123.130 | 58.515 | 53.295 | 1.00248.18 | 1SG | 171 |
| ATOM | 171 | C   | ASN | 24 | 123.558 | 61.579 | 51.737 | 1.00248.18 | 1SG | 172 |
| ATOM | 172 | O   | ASN | 24 | 122.693 | 61.462 | 50.870 | 1.00248.18 | 1SG | 173 |
| ATOM | 173 | N   | ARG | 25 | 124.859 | 61.324 | 51.502 | 1.00280.11 | 1SG | 174 |
| ATOM | 174 | CA  | ARG | 25 | 125.307 | 60.882 | 50.216 | 1.00280.11 | 1SG | 175 |
| ATOM | 175 | CB  | ARG | 25 | 126.830 | 60.967 | 50.013 | 1.00280.11 | 1SG | 176 |
| ATOM | 176 | CG  | ARG | 25 | 127.309 | 62.372 | 49.651 | 1.00280.11 | 1SG | 177 |
| ATOM | 177 | CD  | ARG | 25 | 127.014 | 63.421 | 50.721 | 1.00280.11 | 1SG | 178 |
| ATOM | 178 | NE  | ARG | 25 | 127.357 | 64.748 | 50.139 | 1.00280.11 | 1SG | 179 |
| ATOM | 179 | CZ  | ARG | 25 | 126.445 | 65.396 | 49.358 | 1.00280.11 | 1SG | 180 |
| ATOM | 180 | NH1 | ARG | 25 | 125.240 | 64.815 | 49.085 | 1.00280.11 | 1SG | 181 |
| ATOM | 181 | NH2 | ARG | 25 | 126.739 | 66.624 | 48.841 | 1.00280.11 | 1SG | 182 |
| ATOM | 182 | C   | ARG | 25 | 124.900 | 59.463 | 50.016 | 1.00280.11 | 1SG | 183 |
| ATOM | 183 | O   | ARG | 25 | 124.659 | 58.720 | 50.967 | 1.00280.11 | 1SG | 184 |
| ATOM | 184 | N   | HIS | 26 | 124.796 | 59.071 | 48.733 | 1.00248.77 | 1SG | 185 |
| ATOM | 185 | CA  | HIS | 26 | 124.419 | 57.749 | 48.333 | 1.00248.77 | 1SG | 186 |
| ATOM | 186 | ND1 | HIS | 26 | 124.044 | 55.918 | 44.948 | 1.00248.77 | 1SG | 187 |
| ATOM | 187 | CG  | HIS | 26 | 124.016 | 56.245 | 46.284 | 1.00248.77 | 1SG | 188 |
| ATOM | 188 | CB  | HIS | 26 | 124.402 | 57.600 | 46.800 | 1.00248.77 | 1SG | 189 |
| ATOM | 189 | NE2 | HIS | 26 | 123.343 | 54.106 | 46.025 | 1.00248.77 | 1SG | 190 |
| ATOM | 190 | CD2 | HIS | 26 | 123.584 | 55.127 | 46.929 | 1.00248.77 | 1SG | 191 |
| ATOM | 191 | CE1 | HIS | 26 | 123.632 | 54.629 | 44.849 | 1.00248.77 | 1SG | 192 |
| ATOM | 192 | C   | HIS | 26 | 125.445 | 56.806 | 48.863 | 1.00248.77 | 1SG | 193 |
| ATOM | 193 | O   | HIS | 26 | 126.639 | 57.103 | 48.852 | 1.00248.77 | 1SG | 194 |
| ATOM | 194 | N   | GLY | 27 | 124.994 | 55.639 | 49.365 | 1.00132.98 | 1SG | 195 |
| ATOM | 195 | CA  | GLY | 27 | 125.922 | 54.670 | 49.863 | 1.00132.98 | 1SG | 196 |
| ATOM | 196 | C   | GLY | 27 | 125.159 | 53.436 | 50.221 | 1.00132.98 | 1SG | 197 |
| ATOM | 197 | O   | GLY | 27 | 123.930 | 53.439 | 50.267 | 1.00132.98 | 1SG | 198 |
| ATOM | 198 | N   | ASN | 28 | 125.900 | 52.343 | 50.483 | 1.00184.90 | 1SG | 199 |
| ATOM | 199 | CA  | ASN | 28 | 125.336 | 51.089 | 50.879 | 1.00184.90 | 1SG | 200 |
| ATOM | 200 | CB  | ASN | 28 | 125.584 | 49.936 | 49.891 | 1.00184.90 | 1SG | 201 |
| ATOM | 201 | CG  | ASN | 28 | 124.672 | 50.135 | 48.690 | 1.00184.90 | 1SG | 202 |
| ATOM | 202 | OD1 | ASN | 28 | 124.635 | 49.316 | 47.773 | 1.00184.90 | 1SG | 203 |
| ATOM | 203 | ND2 | ASN | 28 | 123.911 | 51.262 | 48.693 | 1.00184.90 | 1SG | 204 |
| ATOM | 204 | C   | ASN | 28 | 126.005 | 50.730 | 52.161 | 1.00184.90 | 1SG | 205 |
| ATOM | 205 | O   | ASN | 28 | 126.813 | 51.510 | 52.664 | 1.00184.90 | 1SG | 206 |
| ATOM | 206 | N   | MET | 29 | 125.667 | 49.557 | 52.754 | 1.00125.90 | 1SG | 207 |
| ATOM | 207 | CA  | MET | 29 | 126.378 | 49.140 | 53.931 | 1.00125.90 | 1SG | 208 |
| ATOM | 208 | CB  | MET | 29 | 125.947 | 47.766 | 54.461 | 1.00125.90 | 1SG | 209 |
| ATOM | 209 | CG  | MET | 29 | 124.511 | 47.774 | 54.988 | 1.00125.90 | 1SG | 210 |
| ATOM | 210 | SD  | MET | 29 | 123.996 | 46.230 | 55.790 | 1.00125.90 | 1SG | 211 |
| ATOM | 211 | CE  | MET | 29 | 122.213 | 46.558 | 55.678 | 1.00125.90 | 1SG | 212 |

## Supplementary material 1.txt

|      |     |     |     |    |         |        |        |            |     |     |
|------|-----|-----|-----|----|---------|--------|--------|------------|-----|-----|
| ATOM | 212 | C   | MET | 29 | 127.758 | 49.055 | 53.414 | 1.00125.90 | 1SG | 213 |
| ATOM | 213 | O   | MET | 29 | 128.735 | 49.396 | 54.078 | 1.00125.90 | 1SG | 214 |
| ATOM | 214 | N   | TRP | 30 | 127.826 | 48.590 | 52.161 | 1.00138.66 | 1SG | 215 |
| ATOM | 215 | CA  | TRP | 30 | 129.030 | 48.534 | 51.415 | 1.00138.66 | 1SG | 216 |
| ATOM | 216 | CB  | TRP | 30 | 128.776 | 47.833 | 50.073 | 1.00138.66 | 1SG | 217 |
| ATOM | 217 | CG  | TRP | 30 | 128.047 | 46.542 | 50.345 | 1.00138.66 | 1SG | 218 |
| ATOM | 218 | CD2 | TRP | 30 | 128.565 | 45.507 | 51.189 | 1.00138.66 | 1SG | 219 |
| ATOM | 219 | CD1 | TRP | 30 | 126.777 | 46.169 | 50.009 | 1.00138.66 | 1SG | 220 |
| ATOM | 220 | NE1 | TRP | 30 | 126.467 | 44.969 | 50.603 | 1.00138.66 | 1SG | 221 |
| ATOM | 221 | CE2 | TRP | 30 | 127.560 | 44.552 | 51.335 | 1.00138.66 | 1SG | 222 |
| ATOM | 222 | CE3 | TRP | 30 | 129.772 | 45.381 | 51.814 | 1.00138.66 | 1SG | 223 |
| ATOM | 223 | CZ2 | TRP | 30 | 127.749 | 43.451 | 52.119 | 1.00138.66 | 1SG | 224 |
| ATOM | 224 | CZ3 | TRP | 30 | 129.972 | 44.257 | 52.581 | 1.00138.66 | 1SG | 225 |
| ATOM | 225 | CH2 | TRP | 30 | 128.977 | 43.315 | 52.732 | 1.00138.66 | 1SG | 226 |
| ATOM | 226 | C   | TRP | 30 | 129.456 | 49.942 | 51.172 | 1.00138.66 | 1SG | 227 |
| ATOM | 227 | O   | TRP | 30 | 130.606 | 50.297 | 51.424 | 1.00138.66 | 1SG | 228 |
| ATOM | 228 | N   | GLU | 31 | 128.506 | 50.774 | 50.688 | 1.00215.36 | 1SG | 229 |
| ATOM | 229 | CA  | GLU | 31 | 128.717 | 52.169 | 50.416 | 1.00215.36 | 1SG | 230 |
| ATOM | 230 | CB  | GLU | 31 | 129.781 | 52.896 | 51.262 | 1.00215.36 | 1SG | 231 |
| ATOM | 231 | CG  | GLU | 31 | 129.363 | 53.145 | 52.712 | 1.00215.36 | 1SG | 232 |
| ATOM | 232 | CD  | GLU | 31 | 130.309 | 54.184 | 53.298 | 1.00215.36 | 1SG | 233 |
| ATOM | 233 | OE1 | GLU | 31 | 131.151 | 54.720 | 52.528 | 1.00215.36 | 1SG | 234 |
| ATOM | 234 | OE2 | GLU | 31 | 130.196 | 54.461 | 54.522 | 1.00215.36 | 1SG | 235 |
| ATOM | 235 | C   | GLU | 31 | 129.071 | 52.356 | 48.977 | 1.00215.36 | 1SG | 236 |
| ATOM | 236 | O   | GLU | 31 | 128.684 | 51.588 | 48.098 | 1.00215.36 | 1SG | 237 |
| ATOM | 237 | N   | ASP | 32 | 129.822 | 53.443 | 48.748 | 1.00140.79 | 1SG | 238 |
| ATOM | 238 | CA  | ASP | 32 | 130.306 | 53.972 | 47.507 | 1.00140.79 | 1SG | 239 |
| ATOM | 239 | CB  | ASP | 32 | 130.979 | 55.343 | 47.722 | 1.00140.79 | 1SG | 240 |
| ATOM | 240 | CG  | ASP | 32 | 131.371 | 55.968 | 46.393 | 1.00140.79 | 1SG | 241 |
| ATOM | 241 | OD1 | ASP | 32 | 132.402 | 55.537 | 45.812 | 1.00140.79 | 1SG | 242 |
| ATOM | 242 | OD2 | ASP | 32 | 130.645 | 56.897 | 45.947 | 1.00140.79 | 1SG | 243 |
| ATOM | 243 | C   | ASP | 32 | 131.305 | 53.031 | 46.904 | 1.00140.79 | 1SG | 244 |
| ATOM | 244 | O   | ASP | 32 | 131.614 | 53.132 | 45.718 | 1.00140.79 | 1SG | 245 |
| ATOM | 245 | N   | ASP | 33 | 131.819 | 52.070 | 47.696 | 1.0074.54  | 1SG | 246 |
| ATOM | 246 | CA  | ASP | 33 | 132.921 | 51.240 | 47.290 | 1.0074.54  | 1SG | 247 |
| ATOM | 247 | CB  | ASP | 33 | 133.199 | 50.085 | 48.269 | 1.0074.54  | 1SG | 248 |
| ATOM | 248 | CG  | ASP | 33 | 133.740 | 50.670 | 49.565 | 1.0074.54  | 1SG | 249 |
| ATOM | 249 | OD1 | ASP | 33 | 133.244 | 51.751 | 49.980 | 1.0074.54  | 1SG | 250 |
| ATOM | 250 | OD2 | ASP | 33 | 134.646 | 50.032 | 50.166 | 1.0074.54  | 1SG | 251 |
| ATOM | 251 | C   | ASP | 33 | 132.673 | 50.617 | 45.944 | 1.0074.54  | 1SG | 252 |
| ATOM | 252 | O   | ASP | 33 | 133.608 | 50.463 | 45.162 | 1.0074.54  | 1SG | 253 |
| ATOM | 253 | N   | ARG | 34 | 131.422 | 50.218 | 45.662 | 1.00154.57 | 1SG | 254 |
| ATOM | 254 | CA  | ARG | 34 | 130.969 | 49.587 | 44.449 | 1.00154.57 | 1SG | 255 |
| ATOM | 255 | CB  | ARG | 34 | 129.552 | 49.024 | 44.641 | 1.00154.57 | 1SG | 256 |
| ATOM | 256 | CG  | ARG | 34 | 128.598 | 50.082 | 45.201 | 1.00154.57 | 1SG | 257 |
| ATOM | 257 | CD  | ARG | 34 | 127.178 | 49.589 | 45.474 | 1.00154.57 | 1SG | 258 |
| ATOM | 258 | NE  | ARG | 34 | 126.574 | 50.562 | 46.428 | 1.00154.57 | 1SG | 259 |
| ATOM | 259 | CZ  | ARG | 34 | 126.054 | 51.746 | 45.992 | 1.00154.57 | 1SG | 260 |
| ATOM | 260 | NH1 | ARG | 34 | 126.068 | 52.057 | 44.665 | 1.00154.57 | 1SG | 261 |
| ATOM | 261 | NH2 | ARG | 34 | 125.529 | 52.634 | 46.886 | 1.00154.57 | 1SG | 262 |
| ATOM | 262 | C   | ARG | 34 | 130.954 | 50.487 | 43.242 | 1.00154.57 | 1SG | 263 |
| ATOM | 263 | O   | ARG | 34 | 131.141 | 50.022 | 42.117 | 1.00154.57 | 1SG | 264 |
| ATOM | 264 | N   | ILE | 35 | 130.730 | 51.798 | 43.434 | 1.00100.76 | 1SG | 265 |
| ATOM | 265 | CA  | ILE | 35 | 130.488 | 52.698 | 42.340 | 1.00100.76 | 1SG | 266 |
| ATOM | 266 | CB  | ILE | 35 | 130.267 | 54.113 | 42.791 | 1.00100.76 | 1SG | 267 |
| ATOM | 267 | CG2 | ILE | 35 | 131.594 | 54.654 | 43.344 | 1.00100.76 | 1SG | 268 |
| ATOM | 268 | CG1 | ILE | 35 | 129.683 | 54.955 | 41.645 | 1.00100.76 | 1SG | 269 |
| ATOM | 269 | CD1 | ILE | 35 | 129.127 | 56.302 | 42.104 | 1.00100.76 | 1SG | 270 |
| ATOM | 270 | C   | ILE | 35 | 131.605 | 52.711 | 41.340 | 1.00100.76 | 1SG | 271 |
| ATOM | 271 | O   | ILE | 35 | 131.344 | 52.746 | 40.140 | 1.00100.76 | 1SG | 272 |
| ATOM | 272 | N   | GLN | 36 | 132.882 | 52.704 | 41.756 | 1.00103.74 | 1SG | 273 |
| ATOM | 273 | CA  | GLN | 36 | 133.847 | 52.779 | 40.697 | 1.00103.74 | 1SG | 274 |
| ATOM | 274 | CB  | GLN | 36 | 134.719 | 54.045 | 40.752 | 1.00103.74 | 1SG | 275 |
| ATOM | 275 | CG  | GLN | 36 | 135.592 | 54.168 | 41.999 | 1.00103.74 | 1SG | 276 |
| ATOM | 276 | CD  | GLN | 36 | 136.326 | 55.496 | 41.892 | 1.00103.74 | 1SG | 277 |
| ATOM | 277 | OE1 | GLN | 36 | 137.192 | 55.814 | 42.707 | 1.00103.74 | 1SG | 278 |
| ATOM | 278 | NE2 | GLN | 36 | 135.969 | 56.298 | 40.853 | 1.00103.74 | 1SG | 279 |
| ATOM | 279 | C   | GLN | 36 | 134.721 | 51.572 | 40.691 | 1.00103.74 | 1SG | 280 |
| ATOM | 280 | O   | GLN | 36 | 135.132 | 51.070 | 41.736 | 1.00103.74 | 1SG | 281 |
| ATOM | 281 | N   | SER | 37 | 134.980 | 51.044 | 39.477 | 1.0045.55  | 1SG | 282 |
| ATOM | 282 | CA  | SER | 37 | 135.875 | 49.937 | 39.347 | 1.0045.55  | 1SG | 283 |

## Supplementary material 1.txt

|      |     |     |     |    |         |        |        |      |        |     |     |
|------|-----|-----|-----|----|---------|--------|--------|------|--------|-----|-----|
| ATOM | 283 | CB  | SER | 37 | 135.189 | 48.564 | 39.424 | 1.00 | 45.55  | 1SG | 284 |
| ATOM | 284 | OG  | SER | 37 | 134.370 | 48.346 | 38.284 | 1.00 | 45.55  | 1SG | 285 |
| ATOM | 285 | C   | SER | 37 | 136.515 | 50.057 | 38.006 | 1.00 | 45.55  | 1SG | 286 |
| ATOM | 286 | O   | SER | 37 | 135.835 | 50.096 | 36.981 | 1.00 | 45.55  | 1SG | 287 |
| ATOM | 287 | N   | LEU | 38 | 137.860 | 50.108 | 37.987 | 1.00 | 37.42  | 1SG | 288 |
| ATOM | 288 | CA  | LEU | 38 | 138.558 | 50.218 | 36.744 | 1.00 | 37.42  | 1SG | 289 |
| ATOM | 289 | CB  | LEU | 38 | 139.646 | 51.307 | 36.740 | 1.00 | 37.42  | 1SG | 290 |
| ATOM | 290 | CG  | LEU | 38 | 139.100 | 52.734 | 36.934 | 1.00 | 37.42  | 1SG | 291 |
| ATOM | 291 | CD2 | LEU | 38 | 137.894 | 53.003 | 36.020 | 1.00 | 37.42  | 1SG | 292 |
| ATOM | 292 | CD1 | LEU | 38 | 140.216 | 53.781 | 36.778 | 1.00 | 37.42  | 1SG | 293 |
| ATOM | 293 | C   | LEU | 38 | 139.240 | 48.911 | 36.528 | 1.00 | 37.42  | 1SG | 294 |
| ATOM | 294 | O   | LEU | 38 | 140.046 | 48.477 | 37.349 | 1.00 | 37.42  | 1SG | 295 |
| ATOM | 295 | N   | ASN | 39 | 138.924 | 48.248 | 35.402 | 1.00 | 34.97  | 1SG | 296 |
| ATOM | 296 | CA  | ASN | 39 | 139.525 | 46.978 | 35.130 | 1.00 | 34.97  | 1SG | 297 |
| ATOM | 297 | CB  | ASN | 39 | 138.725 | 46.135 | 34.117 | 1.00 | 34.97  | 1SG | 298 |
| ATOM | 298 | CG  | ASN | 39 | 139.331 | 44.740 | 34.040 | 1.00 | 34.97  | 1SG | 299 |
| ATOM | 299 | OD1 | ASN | 39 | 140.548 | 44.569 | 33.981 | 1.00 | 34.97  | 1SG | 300 |
| ATOM | 300 | ND2 | ASN | 39 | 138.453 | 43.702 | 34.042 | 1.00 | 34.97  | 1SG | 301 |
| ATOM | 301 | C   | ASN | 39 | 140.871 | 47.232 | 34.540 | 1.00 | 34.97  | 1SG | 302 |
| ATOM | 302 | O   | ASN | 39 | 141.004 | 47.963 | 33.557 | 1.00 | 34.97  | 1SG | 303 |
| ATOM | 303 | N   | SER | 40 | 141.920 | 46.638 | 35.142 | 1.00 | 83.69  | 1SG | 304 |
| ATOM | 304 | CA  | SER | 40 | 143.223 | 46.816 | 34.578 | 1.00 | 83.69  | 1SG | 305 |
| ATOM | 305 | CB  | SER | 40 | 144.367 | 46.410 | 35.525 | 1.00 | 83.69  | 1SG | 306 |
| ATOM | 306 | OG  | SER | 40 | 144.286 | 45.027 | 35.836 | 1.00 | 83.69  | 1SG | 307 |
| ATOM | 307 | C   | SER | 40 | 143.278 | 45.938 | 33.374 | 1.00 | 83.69  | 1SG | 308 |
| ATOM | 308 | O   | SER | 40 | 143.348 | 44.713 | 33.452 | 1.00 | 83.69  | 1SG | 309 |
| ATOM | 309 | N   | PRO | 41 | 143.261 | 46.585 | 32.251 | 1.00 | 70.57  | 1SG | 310 |
| ATOM | 310 | CA  | PRO | 41 | 143.242 | 45.920 | 30.982 | 1.00 | 70.57  | 1SG | 311 |
| ATOM | 311 | CD  | PRO | 41 | 143.723 | 47.959 | 32.148 | 1.00 | 70.57  | 1SG | 312 |
| ATOM | 312 | CB  | PRO | 41 | 143.283 | 47.043 | 29.950 | 1.00 | 70.57  | 1SG | 313 |
| ATOM | 313 | CG  | PRO | 41 | 144.090 | 48.142 | 30.666 | 1.00 | 70.57  | 1SG | 314 |
| ATOM | 314 | C   | PRO | 41 | 144.426 | 45.026 | 30.821 | 1.00 | 70.57  | 1SG | 315 |
| ATOM | 315 | O   | PRO | 41 | 144.345 | 44.090 | 30.033 | 1.00 | 70.57  | 1SG | 316 |
| ATOM | 316 | N   | TYR | 42 | 145.568 | 45.307 | 31.465 | 1.00 | 84.20  | 1SG | 317 |
| ATOM | 317 | CA  | TYR | 42 | 146.662 | 44.405 | 31.255 | 1.00 | 84.20  | 1SG | 318 |
| ATOM | 318 | CB  | TYR | 42 | 148.001 | 44.905 | 31.821 | 1.00 | 84.20  | 1SG | 319 |
| ATOM | 319 | CG  | TYR | 42 | 148.525 | 45.950 | 30.897 | 1.00 | 84.20  | 1SG | 320 |
| ATOM | 320 | CD1 | TYR | 42 | 148.150 | 47.268 | 31.015 | 1.00 | 84.20  | 1SG | 321 |
| ATOM | 321 | CD2 | TYR | 42 | 149.402 | 45.593 | 29.899 | 1.00 | 84.20  | 1SG | 322 |
| ATOM | 322 | CE1 | TYR | 42 | 148.649 | 48.213 | 30.149 | 1.00 | 84.20  | 1SG | 323 |
| ATOM | 323 | CE2 | TYR | 42 | 149.904 | 46.531 | 29.031 | 1.00 | 84.20  | 1SG | 324 |
| ATOM | 324 | CZ  | TYR | 42 | 149.526 | 47.845 | 29.155 | 1.00 | 84.20  | 1SG | 325 |
| ATOM | 325 | OH  | TYR | 42 | 150.040 | 48.811 | 28.264 | 1.00 | 84.20  | 1SG | 326 |
| ATOM | 326 | C   | TYR | 42 | 146.370 | 43.081 | 31.882 | 1.00 | 84.20  | 1SG | 327 |
| ATOM | 327 | O   | TYR | 42 | 146.560 | 42.035 | 31.264 | 1.00 | 84.20  | 1SG | 328 |
| ATOM | 328 | N   | GLY | 43 | 145.880 | 43.104 | 33.133 | 1.00 | 28.38  | 1SG | 329 |
| ATOM | 329 | CA  | GLY | 43 | 145.673 | 41.900 | 33.883 | 1.00 | 28.38  | 1SG | 330 |
| ATOM | 330 | C   | GLY | 43 | 144.614 | 41.033 | 33.274 | 1.00 | 28.38  | 1SG | 331 |
| ATOM | 331 | O   | GLY | 43 | 144.765 | 39.813 | 33.237 | 1.00 | 28.38  | 1SG | 332 |
| ATOM | 332 | N   | ALA | 44 | 143.501 | 41.624 | 32.797 | 1.00 | 44.92  | 1SG | 333 |
| ATOM | 333 | CA  | ALA | 44 | 142.429 | 40.785 | 32.342 | 1.00 | 44.92  | 1SG | 334 |
| ATOM | 334 | CB  | ALA | 44 | 141.141 | 41.564 | 32.005 | 1.00 | 44.92  | 1SG | 335 |
| ATOM | 335 | C   | ALA | 44 | 142.850 | 39.956 | 31.162 | 1.00 | 44.92  | 1SG | 336 |
| ATOM | 336 | O   | ALA | 44 | 142.617 | 38.749 | 31.170 | 1.00 | 44.92  | 1SG | 337 |
| ATOM | 337 | N   | PRO | 45 | 143.459 | 40.511 | 30.146 | 1.00 | 103.73 | 1SG | 338 |
| ATOM | 338 | CA  | PRO | 45 | 143.907 | 39.651 | 29.090 | 1.00 | 103.73 | 1SG | 339 |
| ATOM | 339 | CD  | PRO | 45 | 142.920 | 41.735 | 29.582 | 1.00 | 103.73 | 1SG | 340 |
| ATOM | 340 | CB  | PRO | 45 | 144.217 | 40.556 | 27.903 | 1.00 | 103.73 | 1SG | 341 |
| ATOM | 341 | CG  | PRO | 45 | 143.183 | 41.680 | 28.068 | 1.00 | 103.73 | 1SG | 342 |
| ATOM | 342 | C   | PRO | 45 | 145.008 | 38.730 | 29.497 | 1.00 | 103.73 | 1SG | 343 |
| ATOM | 343 | O   | PRO | 45 | 145.170 | 37.695 | 28.855 | 1.00 | 103.73 | 1SG | 344 |
| ATOM | 344 | N   | ALA | 46 | 145.795 | 39.082 | 30.530 | 1.00 | 23.95  | 1SG | 345 |
| ATOM | 345 | CA  | ALA | 46 | 146.848 | 38.199 | 30.938 | 1.00 | 23.95  | 1SG | 346 |
| ATOM | 346 | CB  | ALA | 46 | 147.688 | 38.774 | 32.092 | 1.00 | 23.95  | 1SG | 347 |
| ATOM | 347 | C   | ALA | 46 | 146.218 | 36.936 | 31.431 | 1.00 | 23.95  | 1SG | 348 |
| ATOM | 348 | O   | ALA | 46 | 146.638 | 35.836 | 31.075 | 1.00 | 23.95  | 1SG | 349 |
| ATOM | 349 | N   | TYR | 47 | 145.167 | 37.077 | 32.261 | 1.00 | 53.63  | 1SG | 350 |
| ATOM | 350 | CA  | TYR | 47 | 144.472 | 35.951 | 32.813 | 1.00 | 53.63  | 1SG | 351 |
| ATOM | 351 | CB  | TYR | 47 | 143.387 | 36.346 | 33.831 | 1.00 | 53.63  | 1SG | 352 |
| ATOM | 352 | CG  | TYR | 47 | 144.046 | 36.654 | 35.132 | 1.00 | 53.63  | 1SG | 353 |
| ATOM | 353 | CD1 | TYR | 47 | 144.770 | 37.808 | 35.327 | 1.00 | 53.63  | 1SG | 354 |

## Supplementary material 1.txt

|      |     |     |     |    |         |        |        |      |        |     |     |
|------|-----|-----|-----|----|---------|--------|--------|------|--------|-----|-----|
| ATOM | 354 | CD2 | TYR | 47 | 143.914 | 35.768 | 36.176 | 1.00 | 53.63  | 1SG | 355 |
| ATOM | 355 | CE1 | TYR | 47 | 145.364 | 38.060 | 36.544 | 1.00 | 53.63  | 1SG | 356 |
| ATOM | 356 | CE2 | TYR | 47 | 144.505 | 36.015 | 37.393 | 1.00 | 53.63  | 1SG | 357 |
| ATOM | 357 | CZ  | TYR | 47 | 145.233 | 37.164 | 37.578 | 1.00 | 53.63  | 1SG | 358 |
| ATOM | 358 | OH  | TYR | 47 | 145.840 | 37.420 | 38.826 | 1.00 | 53.63  | 1SG | 359 |
| ATOM | 359 | C   | TYR | 47 | 143.797 | 35.191 | 31.722 | 1.00 | 53.63  | 1SG | 360 |
| ATOM | 360 | O   | TYR | 47 | 143.847 | 33.962 | 31.692 | 1.00 | 53.63  | 1SG | 361 |
| ATOM | 361 | N   | GLN | 48 | 143.148 | 35.906 | 30.787 | 1.00 | 84.14  | 1SG | 362 |
| ATOM | 362 | CA  | GLN | 48 | 142.396 | 35.234 | 29.770 | 1.00 | 84.14  | 1SG | 363 |
| ATOM | 363 | CB  | GLN | 48 | 141.583 | 36.184 | 28.874 | 1.00 | 84.14  | 1SG | 364 |
| ATOM | 364 | CG  | GLN | 48 | 142.414 | 37.143 | 28.025 | 1.00 | 84.14  | 1SG | 365 |
| ATOM | 365 | CD  | GLN | 48 | 141.427 | 37.972 | 27.219 | 1.00 | 84.14  | 1SG | 366 |
| ATOM | 366 | OE1 | GLN | 48 | 141.403 | 39.202 | 27.305 | 1.00 | 84.14  | 1SG | 367 |
| ATOM | 367 | NE2 | GLN | 48 | 140.578 | 37.281 | 26.415 | 1.00 | 84.14  | 1SG | 368 |
| ATOM | 368 | C   | GLN | 48 | 143.295 | 34.417 | 28.898 | 1.00 | 84.14  | 1SG | 369 |
| ATOM | 369 | O   | GLN | 48 | 142.940 | 33.301 | 28.522 | 1.00 | 84.14  | 1SG | 370 |
| ATOM | 370 | N   | GLU | 49 | 144.486 | 34.938 | 28.552 | 1.00 | 35.08  | 1SG | 371 |
| ATOM | 371 | CA  | GLU | 49 | 145.340 | 34.220 | 27.647 | 1.00 | 35.08  | 1SG | 372 |
| ATOM | 372 | CB  | GLU | 49 | 146.598 | 35.014 | 27.261 | 1.00 | 35.08  | 1SG | 373 |
| ATOM | 373 | CG  | GLU | 49 | 147.447 | 34.331 | 26.188 | 1.00 | 35.08  | 1SG | 374 |
| ATOM | 374 | CD  | GLU | 49 | 148.526 | 35.319 | 25.775 | 1.00 | 35.08  | 1SG | 375 |
| ATOM | 375 | OE1 | GLU | 49 | 148.155 | 36.434 | 25.320 | 1.00 | 35.08  | 1SG | 376 |
| ATOM | 376 | OE2 | GLU | 49 | 149.731 | 34.979 | 25.912 | 1.00 | 35.08  | 1SG | 377 |
| ATOM | 377 | C   | GLU | 49 | 145.778 | 32.920 | 28.255 | 1.00 | 35.08  | 1SG | 378 |
| ATOM | 378 | O   | GLU | 49 | 145.750 | 31.884 | 27.593 | 1.00 | 35.08  | 1SG | 379 |
| ATOM | 379 | N   | ARG | 50 | 146.192 | 32.943 | 29.536 | 1.00 | 138.02 | 1SG | 380 |
| ATOM | 380 | CA  | ARG | 50 | 146.667 | 31.770 | 30.220 | 1.00 | 138.02 | 1SG | 381 |
| ATOM | 381 | CB  | ARG | 50 | 147.192 | 32.086 | 31.631 | 1.00 | 138.02 | 1SG | 382 |
| ATOM | 382 | CG  | ARG | 50 | 148.483 | 32.907 | 31.640 | 1.00 | 138.02 | 1SG | 383 |
| ATOM | 383 | CD  | ARG | 50 | 148.974 | 33.258 | 33.046 | 1.00 | 138.02 | 1SG | 384 |
| ATOM | 384 | NE  | ARG | 50 | 148.940 | 32.012 | 33.862 | 1.00 | 138.02 | 1SG | 385 |
| ATOM | 385 | CZ  | ARG | 50 | 149.752 | 31.884 | 34.952 | 1.00 | 138.02 | 1SG | 386 |
| ATOM | 386 | NH1 | ARG | 50 | 150.638 | 32.875 | 35.263 | 1.00 | 138.02 | 1SG | 387 |
| ATOM | 387 | NH2 | ARG | 50 | 149.679 | 30.765 | 35.731 | 1.00 | 138.02 | 1SG | 388 |
| ATOM | 388 | C   | ARG | 50 | 145.545 | 30.793 | 30.378 | 1.00 | 138.02 | 1SG | 389 |
| ATOM | 389 | O   | ARG | 50 | 145.732 | 29.584 | 30.246 | 1.00 | 138.02 | 1SG | 390 |
| ATOM | 390 | N   | SER | 51 | 144.336 | 31.302 | 30.666 | 1.00 | 30.14  | 1SG | 391 |
| ATOM | 391 | CA  | SER | 51 | 143.214 | 30.449 | 30.919 | 1.00 | 30.14  | 1SG | 392 |
| ATOM | 392 | CB  | SER | 51 | 141.926 | 31.236 | 31.211 | 1.00 | 30.14  | 1SG | 393 |
| ATOM | 393 | OG  | SER | 51 | 142.076 | 31.992 | 32.404 | 1.00 | 30.14  | 1SG | 394 |
| ATOM | 394 | C   | SER | 51 | 142.963 | 29.613 | 29.709 | 1.00 | 30.14  | 1SG | 395 |
| ATOM | 395 | O   | SER | 51 | 142.701 | 28.419 | 29.819 | 1.00 | 30.14  | 1SG | 396 |
| ATOM | 396 | N   | GLU | 52 | 143.093 | 30.207 | 28.512 | 1.00 | 60.34  | 1SG | 397 |
| ATOM | 397 | CA  | GLU | 52 | 142.769 | 29.507 | 27.304 | 1.00 | 60.34  | 1SG | 398 |
| ATOM | 398 | CB  | GLU | 52 | 143.044 | 30.362 | 26.056 | 1.00 | 60.34  | 1SG | 399 |
| ATOM | 399 | CG  | GLU | 52 | 142.189 | 31.631 | 26.007 | 1.00 | 60.34  | 1SG | 400 |
| ATOM | 400 | CD  | GLU | 52 | 142.546 | 32.408 | 24.748 | 1.00 | 60.34  | 1SG | 401 |
| ATOM | 401 | OE1 | GLU | 52 | 143.293 | 31.852 | 23.900 | 1.00 | 60.34  | 1SG | 402 |
| ATOM | 402 | OE2 | GLU | 52 | 142.075 | 33.569 | 24.619 | 1.00 | 60.34  | 1SG | 403 |
| ATOM | 403 | C   | GLU | 52 | 143.625 | 28.285 | 27.217 | 1.00 | 60.34  | 1SG | 404 |
| ATOM | 404 | O   | GLU | 52 | 143.146 | 27.215 | 26.845 | 1.00 | 60.34  | 1SG | 405 |
| ATOM | 405 | N   | LYS | 53 | 144.920 | 28.410 | 27.558 | 1.00 | 83.40  | 1SG | 406 |
| ATOM | 406 | CA  | LYS | 53 | 145.804 | 27.282 | 27.488 | 1.00 | 83.40  | 1SG | 407 |
| ATOM | 407 | CB  | LYS | 53 | 147.254 | 27.634 | 27.862 | 1.00 | 83.40  | 1SG | 408 |
| ATOM | 408 | CG  | LYS | 53 | 147.951 | 28.553 | 26.858 | 1.00 | 83.40  | 1SG | 409 |
| ATOM | 409 | CD  | LYS | 53 | 149.243 | 29.173 | 27.397 | 1.00 | 83.40  | 1SG | 410 |
| ATOM | 410 | CE  | LYS | 53 | 150.304 | 28.144 | 27.791 | 1.00 | 83.40  | 1SG | 411 |
| ATOM | 411 | NZ  | LYS | 53 | 150.865 | 27.507 | 26.578 | 1.00 | 83.40  | 1SG | 412 |
| ATOM | 412 | C   | LYS | 53 | 145.354 | 26.246 | 28.470 | 1.00 | 83.40  | 1SG | 413 |
| ATOM | 413 | O   | LYS | 53 | 145.273 | 25.064 | 28.144 | 1.00 | 83.40  | 1SG | 414 |
| ATOM | 414 | N   | LEU | 54 | 145.027 | 26.683 | 29.698 | 1.00 | 48.43  | 1SG | 415 |
| ATOM | 415 | CA  | LEU | 54 | 144.648 | 25.813 | 30.770 | 1.00 | 48.43  | 1SG | 416 |
| ATOM | 416 | CB  | LEU | 54 | 144.378 | 26.581 | 32.076 | 1.00 | 48.43  | 1SG | 417 |
| ATOM | 417 | CG  | LEU | 54 | 145.613 | 27.312 | 32.639 | 1.00 | 48.43  | 1SG | 418 |
| ATOM | 418 | CD2 | LEU | 54 | 146.804 | 26.356 | 32.815 | 1.00 | 48.43  | 1SG | 419 |
| ATOM | 419 | CD1 | LEU | 54 | 145.273 | 28.059 | 33.940 | 1.00 | 48.43  | 1SG | 420 |
| ATOM | 420 | C   | LEU | 54 | 143.385 | 25.108 | 30.401 | 1.00 | 48.43  | 1SG | 421 |
| ATOM | 421 | O   | LEU | 54 | 143.199 | 23.946 | 30.755 | 1.00 | 48.43  | 1SG | 422 |
| ATOM | 422 | N   | ILE | 55 | 142.466 | 25.806 | 29.703 | 1.00 | 96.54  | 1SG | 423 |
| ATOM | 423 | CA  | ILE | 55 | 141.223 | 25.193 | 29.333 | 1.00 | 96.54  | 1SG | 424 |
| ATOM | 424 | CB  | ILE | 55 | 140.219 | 26.122 | 28.702 | 1.00 | 96.54  | 1SG | 425 |

## Supplementary material 1.txt

|      |     |     |     |    |         |        |        |      |        |     |     |
|------|-----|-----|-----|----|---------|--------|--------|------|--------|-----|-----|
| ATOM | 425 | CG2 | ILE | 55 | 139.329 | 25.272 | 27.780 | 1.00 | 96.54  | 1SG | 426 |
| ATOM | 426 | CG1 | ILE | 55 | 139.404 | 26.887 | 29.769 | 1.00 | 96.54  | 1SG | 427 |
| ATOM | 427 | CD1 | ILE | 55 | 140.183 | 27.826 | 30.684 | 1.00 | 96.54  | 1SG | 428 |
| ATOM | 428 | C   | ILE | 55 | 141.426 | 24.022 | 28.421 | 1.00 | 96.54  | 1SG | 429 |
| ATOM | 429 | O   | ILE | 55 | 140.795 | 22.985 | 28.613 | 1.00 | 96.54  | 1SG | 430 |
| ATOM | 430 | N   | GLU | 56 | 142.294 | 24.133 | 27.400 | 1.00 | 93.34  | 1SG | 431 |
| ATOM | 431 | CA  | GLU | 56 | 142.478 | 23.015 | 26.516 | 1.00 | 93.34  | 1SG | 432 |
| ATOM | 432 | CB  | GLU | 56 | 143.389 | 23.313 | 25.313 | 1.00 | 93.34  | 1SG | 433 |
| ATOM | 433 | CG  | GLU | 56 | 142.713 | 24.145 | 24.222 | 1.00 | 93.34  | 1SG | 434 |
| ATOM | 434 | CD  | GLU | 56 | 141.684 | 23.262 | 23.526 | 1.00 | 93.34  | 1SG | 435 |
| ATOM | 435 | OE1 | GLU | 56 | 141.592 | 22.058 | 23.888 | 1.00 | 93.34  | 1SG | 436 |
| ATOM | 436 | OE2 | GLU | 56 | 140.973 | 23.780 | 22.624 | 1.00 | 93.34  | 1SG | 437 |
| ATOM | 437 | C   | GLU | 56 | 143.096 | 21.883 | 27.270 | 1.00 | 93.34  | 1SG | 438 |
| ATOM | 438 | O   | GLU | 56 | 142.752 | 20.724 | 27.047 | 1.00 | 93.34  | 1SG | 439 |
| ATOM | 439 | N   | GLU | 57 | 144.031 | 22.189 | 28.189 | 1.00 | 35.43  | 1SG | 440 |
| ATOM | 440 | CA  | GLU | 57 | 144.718 | 21.154 | 28.906 | 1.00 | 35.43  | 1SG | 441 |
| ATOM | 441 | CB  | GLU | 57 | 145.746 | 21.720 | 29.901 | 1.00 | 35.43  | 1SG | 442 |
| ATOM | 442 | CG  | GLU | 57 | 146.910 | 22.439 | 29.219 | 1.00 | 35.43  | 1SG | 443 |
| ATOM | 443 | CD  | GLU | 57 | 147.745 | 23.109 | 30.299 | 1.00 | 35.43  | 1SG | 444 |
| ATOM | 444 | OE1 | GLU | 57 | 147.320 | 23.067 | 31.484 | 1.00 | 35.43  | 1SG | 445 |
| ATOM | 445 | OE2 | GLU | 57 | 148.818 | 23.672 | 29.953 | 1.00 | 35.43  | 1SG | 446 |
| ATOM | 446 | C   | GLU | 57 | 143.716 | 20.371 | 29.692 | 1.00 | 35.43  | 1SG | 447 |
| ATOM | 447 | O   | GLU | 57 | 143.722 | 19.143 | 29.665 | 1.00 | 35.43  | 1SG | 448 |
| ATOM | 448 | N   | ILE | 58 | 142.810 | 21.071 | 30.395 | 1.00 | 111.04 | 1SG | 449 |
| ATOM | 449 | CA  | ILE | 58 | 141.802 | 20.442 | 31.192 | 1.00 | 111.04 | 1SG | 450 |
| ATOM | 450 | CB  | ILE | 58 | 141.083 | 21.419 | 32.084 | 1.00 | 111.04 | 1SG | 451 |
| ATOM | 451 | CG2 | ILE | 58 | 142.108 | 21.944 | 33.102 | 1.00 | 111.04 | 1SG | 452 |
| ATOM | 452 | CG1 | ILE | 58 | 140.404 | 22.542 | 31.291 | 1.00 | 111.04 | 1SG | 453 |
| ATOM | 453 | CD1 | ILE | 58 | 139.662 | 23.534 | 32.186 | 1.00 | 111.04 | 1SG | 454 |
| ATOM | 454 | C   | ILE | 58 | 140.866 | 19.686 | 30.300 | 1.00 | 111.04 | 1SG | 455 |
| ATOM | 455 | O   | ILE | 58 | 140.364 | 18.623 | 30.667 | 1.00 | 111.04 | 1SG | 456 |
| ATOM | 456 | N   | LYS | 59 | 140.598 | 20.224 | 29.097 | 1.00 | 111.76 | 1SG | 457 |
| ATOM | 457 | CA  | LYS | 59 | 139.723 | 19.583 | 28.159 | 1.00 | 111.76 | 1SG | 458 |
| ATOM | 458 | CB  | LYS | 59 | 139.629 | 20.365 | 26.837 | 1.00 | 111.76 | 1SG | 459 |
| ATOM | 459 | CG  | LYS | 59 | 138.524 | 19.887 | 25.894 | 1.00 | 111.76 | 1SG | 460 |
| ATOM | 460 | CD  | LYS | 59 | 138.351 | 20.789 | 24.670 | 1.00 | 111.76 | 1SG | 461 |
| ATOM | 461 | CE  | LYS | 59 | 138.546 | 22.279 | 24.966 | 1.00 | 111.76 | 1SG | 462 |
| ATOM | 462 | NZ  | LYS | 59 | 137.460 | 22.778 | 25.838 | 1.00 | 111.76 | 1SG | 463 |
| ATOM | 463 | C   | LYS | 59 | 140.292 | 18.240 | 27.824 | 1.00 | 111.76 | 1SG | 464 |
| ATOM | 464 | O   | LYS | 59 | 139.578 | 17.241 | 27.808 | 1.00 | 111.76 | 1SG | 465 |
| ATOM | 465 | N   | LEU | 60 | 141.615 | 18.181 | 27.593 | 1.00 | 40.38  | 1SG | 466 |
| ATOM | 466 | CA  | LEU | 60 | 142.261 | 16.974 | 27.167 | 1.00 | 40.38  | 1SG | 467 |
| ATOM | 467 | CB  | LEU | 60 | 143.766 | 17.178 | 26.920 | 1.00 | 40.38  | 1SG | 468 |
| ATOM | 468 | CG  | LEU | 60 | 144.497 | 15.928 | 26.399 | 1.00 | 40.38  | 1SG | 469 |
| ATOM | 469 | CD2 | LEU | 60 | 146.021 | 16.132 | 26.413 | 1.00 | 40.38  | 1SG | 470 |
| ATOM | 470 | CD1 | LEU | 60 | 143.970 | 15.509 | 25.017 | 1.00 | 40.38  | 1SG | 471 |
| ATOM | 471 | C   | LEU | 60 | 142.084 | 15.927 | 28.222 | 1.00 | 40.38  | 1SG | 472 |
| ATOM | 472 | O   | LEU | 60 | 141.844 | 14.762 | 27.909 | 1.00 | 40.38  | 1SG | 473 |
| ATOM | 473 | N   | LEU | 61 | 142.180 | 16.316 | 29.507 | 1.00 | 86.80  | 1SG | 474 |
| ATOM | 474 | CA  | LEU | 61 | 142.046 | 15.355 | 30.565 | 1.00 | 86.80  | 1SG | 475 |
| ATOM | 475 | CB  | LEU | 61 | 142.236 | 15.940 | 31.974 | 1.00 | 86.80  | 1SG | 476 |
| ATOM | 476 | CG  | LEU | 61 | 143.711 | 16.167 | 32.348 | 1.00 | 86.80  | 1SG | 477 |
| ATOM | 477 | CD2 | LEU | 61 | 143.848 | 16.613 | 33.812 | 1.00 | 86.80  | 1SG | 478 |
| ATOM | 478 | CD1 | LEU | 61 | 144.410 | 17.115 | 31.369 | 1.00 | 86.80  | 1SG | 479 |
| ATOM | 479 | C   | LEU | 61 | 140.689 | 14.735 | 30.509 | 1.00 | 86.80  | 1SG | 480 |
| ATOM | 480 | O   | LEU | 61 | 140.541 | 13.534 | 30.728 | 1.00 | 86.80  | 1SG | 481 |
| ATOM | 481 | N   | PHE | 62 | 139.657 | 15.536 | 30.203 | 1.00 | 93.35  | 1SG | 482 |
| ATOM | 482 | CA  | PHE | 62 | 138.325 | 15.011 | 30.162 | 1.00 | 93.35  | 1SG | 483 |
| ATOM | 483 | CB  | PHE | 62 | 137.255 | 16.064 | 29.816 | 1.00 | 93.35  | 1SG | 484 |
| ATOM | 484 | CG  | PHE | 62 | 137.085 | 16.967 | 30.989 | 1.00 | 93.35  | 1SG | 485 |
| ATOM | 485 | CD1 | PHE | 62 | 136.320 | 16.571 | 32.062 | 1.00 | 93.35  | 1SG | 486 |
| ATOM | 486 | CD2 | PHE | 62 | 137.675 | 18.209 | 31.017 | 1.00 | 93.35  | 1SG | 487 |
| ATOM | 487 | CE1 | PHE | 62 | 136.154 | 17.395 | 33.150 | 1.00 | 93.35  | 1SG | 488 |
| ATOM | 488 | CE2 | PHE | 62 | 137.513 | 19.038 | 32.103 | 1.00 | 93.35  | 1SG | 489 |
| ATOM | 489 | CZ  | PHE | 62 | 136.752 | 18.632 | 33.172 | 1.00 | 93.35  | 1SG | 490 |
| ATOM | 490 | C   | PHE | 62 | 138.244 | 13.953 | 29.114 | 1.00 | 93.35  | 1SG | 491 |
| ATOM | 491 | O   | PHE | 62 | 137.636 | 12.908 | 29.340 | 1.00 | 93.35  | 1SG | 492 |
| ATOM | 492 | N   | LEU | 63 | 138.844 | 14.184 | 27.930 | 1.00 | 98.65  | 1SG | 493 |
| ATOM | 493 | CA  | LEU | 63 | 138.727 | 13.172 | 26.923 | 1.00 | 98.65  | 1SG | 494 |
| ATOM | 494 | CB  | LEU | 63 | 139.404 | 13.538 | 25.589 | 1.00 | 98.65  | 1SG | 495 |
| ATOM | 495 | CG  | LEU | 63 | 138.666 | 14.641 | 24.806 | 1.00 | 98.65  | 1SG | 496 |

## Supplementary material 1.txt

|      |     |     |     |    |         |        |        |            |       |     |     |
|------|-----|-----|-----|----|---------|--------|--------|------------|-------|-----|-----|
| ATOM | 496 | CD2 | LEU | 63 | 138.609 | 15.956 | 25.593 | 1.00       | 98.65 | 1SG | 497 |
| ATOM | 497 | CD1 | LEU | 63 | 137.275 | 14.170 | 24.354 | 1.00       | 98.65 | 1SG | 498 |
| ATOM | 498 | C   | LEU | 63 | 139.364 | 11.930 | 27.448 | 1.00       | 98.65 | 1SG | 499 |
| ATOM | 499 | O   | LEU | 63 | 138.770 | 10.856 | 27.384 | 1.00       | 98.65 | 1SG | 500 |
| ATOM | 500 | N   | SER | 64 | 140.583 | 12.058 | 28.007 | 1.00166.68 |       | 1SG | 501 |
| ATOM | 501 | CA  | SER | 64 | 141.270 | 10.932 | 28.568 | 1.00166.68 |       | 1SG | 502 |
| ATOM | 502 | CB  | SER | 64 | 140.569 | 10.364 | 29.818 | 1.00166.68 |       | 1SG | 503 |
| ATOM | 503 | OG  | SER | 64 | 141.289 | 9.252  | 30.332 | 1.00166.68 |       | 1SG | 504 |
| ATOM | 504 | C   | SER | 64 | 141.318 | 9.884  | 27.514 | 1.00166.68 |       | 1SG | 505 |
| ATOM | 505 | O   | SER | 64 | 141.283 | 8.691  | 27.814 | 1.00166.68 |       | 1SG | 506 |
| ATOM | 506 | N   | ASP | 65 | 141.362 | 10.332 | 26.245 | 1.00203.79 |       | 1SG | 507 |
| ATOM | 507 | CA  | ASP | 65 | 141.425 | 9.456  | 25.115 | 1.00203.79 |       | 1SG | 508 |
| ATOM | 508 | CB  | ASP | 65 | 140.060 | 9.175  | 24.463 | 1.00203.79 |       | 1SG | 509 |
| ATOM | 509 | CG  | ASP | 65 | 139.253 | 8.262  | 25.375 | 1.00203.79 |       | 1SG | 510 |
| ATOM | 510 | OD1 | ASP | 65 | 139.774 | 7.174  | 25.740 | 1.00203.79 |       | 1SG | 511 |
| ATOM | 511 | OD2 | ASP | 65 | 138.098 | 8.636  | 25.708 | 1.00203.79 |       | 1SG | 512 |
| ATOM | 512 | C   | ASP | 65 | 142.245 | 10.154 | 24.082 | 1.00203.79 |       | 1SG | 513 |
| ATOM | 513 | O   | ASP | 65 | 142.322 | 11.381 | 24.062 | 1.00203.79 |       | 1SG | 514 |
| ATOM | 514 | N   | MET | 66 | 142.902 | 9.378  | 23.202 | 1.00       | 93.81 | 1SG | 515 |
| ATOM | 515 | CA  | MET | 66 | 143.659 | 9.999  | 22.158 | 1.00       | 93.81 | 1SG | 516 |
| ATOM | 516 | CB  | MET | 66 | 144.364 | 8.990  | 21.234 | 1.00       | 93.81 | 1SG | 517 |
| ATOM | 517 | CG  | MET | 66 | 145.465 | 8.172  | 21.914 | 1.00       | 93.81 | 1SG | 518 |
| ATOM | 518 | SD  | MET | 66 | 146.293 | 6.982  | 20.815 | 1.00       | 93.81 | 1SG | 519 |
| ATOM | 519 | CE  | MET | 66 | 147.295 | 6.193  | 22.108 | 1.00       | 93.81 | 1SG | 520 |
| ATOM | 520 | C   | MET | 66 | 142.676 | 10.746 | 21.319 | 1.00       | 93.81 | 1SG | 521 |
| ATOM | 521 | O   | MET | 66 | 142.910 | 11.891 | 20.933 | 1.00       | 93.81 | 1SG | 522 |
| ATOM | 522 | N   | ASP | 67 | 141.524 | 10.109 | 21.036 | 1.00180.14 |       | 1SG | 523 |
| ATOM | 523 | CA  | ASP | 67 | 140.519 | 10.732 | 20.227 | 1.00180.14 |       | 1SG | 524 |
| ATOM | 524 | CB  | ASP | 67 | 139.514 | 9.737  | 19.621 | 1.00180.14 |       | 1SG | 525 |
| ATOM | 525 | CG  | ASP | 67 | 138.705 | 10.449 | 18.545 | 1.00180.14 |       | 1SG | 526 |
| ATOM | 526 | OD1 | ASP | 67 | 139.148 | 11.535 | 18.084 | 1.00180.14 |       | 1SG | 527 |
| ATOM | 527 | OD2 | ASP | 67 | 137.636 | 9.905  | 18.161 | 1.00180.14 |       | 1SG | 528 |
| ATOM | 528 | C   | ASP | 67 | 139.748 | 11.653 | 21.109 | 1.00180.14 |       | 1SG | 529 |
| ATOM | 529 | O   | ASP | 67 | 139.896 | 11.632 | 22.330 | 1.00180.14 |       | 1SG | 530 |
| ATOM | 530 | N   | ASP | 68 | 138.908 | 12.511 | 20.502 | 1.00113.19 |       | 1SG | 531 |
| ATOM | 531 | CA  | ASP | 68 | 138.123 | 13.401 | 21.297 | 1.00113.19 |       | 1SG | 532 |
| ATOM | 532 | CB  | ASP | 68 | 137.807 | 14.724 | 20.583 | 1.00113.19 |       | 1SG | 533 |
| ATOM | 533 | CG  | ASP | 68 | 139.107 | 15.486 | 20.380 | 1.00113.19 |       | 1SG | 534 |
| ATOM | 534 | OD1 | ASP | 68 | 139.901 | 15.590 | 21.353 | 1.00113.19 |       | 1SG | 535 |
| ATOM | 535 | OD2 | ASP | 68 | 139.318 | 15.984 | 19.242 | 1.00113.19 |       | 1SG | 536 |
| ATOM | 536 | C   | ASP | 68 | 136.818 | 12.717 | 21.521 | 1.00113.19 |       | 1SG | 537 |
| ATOM | 537 | O   | ASP | 68 | 135.758 | 13.336 | 21.440 | 1.00113.19 |       | 1SG | 538 |
| ATOM | 538 | N   | SER | 69 | 136.865 | 11.409 | 21.825 | 1.00133.57 |       | 1SG | 539 |
| ATOM | 539 | CA  | SER | 69 | 135.643 | 10.710 | 22.073 | 1.00133.57 |       | 1SG | 540 |
| ATOM | 540 | CB  | SER | 69 | 135.537 | 9.367  | 21.331 | 1.00133.57 |       | 1SG | 541 |
| ATOM | 541 | OG  | SER | 69 | 135.503 | 9.586  | 19.928 | 1.00133.57 |       | 1SG | 542 |
| ATOM | 542 | C   | SER | 69 | 135.633 | 10.420 | 23.532 | 1.00133.57 |       | 1SG | 543 |
| ATOM | 543 | O   | SER | 69 | 136.657 | 10.051 | 24.105 | 1.00133.57 |       | 1SG | 544 |
| ATOM | 544 | N   | CYS | 70 | 134.470 | 10.598 | 24.181 | 1.00       | 90.08 | 1SG | 545 |
| ATOM | 545 | CA  | CYS | 70 | 134.440 | 10.363 | 25.590 | 1.00       | 90.08 | 1SG | 546 |
| ATOM | 546 | CB  | CYS | 70 | 133.252 | 11.034 | 26.303 | 1.00       | 90.08 | 1SG | 547 |
| ATOM | 547 | SG  | CYS | 70 | 131.635 | 10.490 | 25.672 | 1.00       | 90.08 | 1SG | 548 |
| ATOM | 548 | C   | CYS | 70 | 134.362 | 8.892  | 25.818 | 1.00       | 90.08 | 1SG | 549 |
| ATOM | 549 | O   | CYS | 70 | 133.388 | 8.235  | 25.454 | 1.00       | 90.08 | 1SG | 550 |
| ATOM | 550 | N   | ASN | 71 | 135.429 | 8.330  | 26.412 | 1.00159.29 |       | 1SG | 551 |
| ATOM | 551 | CA  | ASN | 71 | 135.428 | 6.939  | 26.730 | 1.00159.29 |       | 1SG | 552 |
| ATOM | 552 | CB  | ASN | 71 | 136.254 | 6.084  | 25.757 | 1.00159.29 |       | 1SG | 553 |
| ATOM | 553 | CG  | ASN | 71 | 135.858 | 4.632  | 25.993 | 1.00159.29 |       | 1SG | 554 |
| ATOM | 554 | OD1 | ASN | 71 | 136.673 | 3.718  | 25.892 | 1.00159.29 |       | 1SG | 555 |
| ATOM | 555 | ND2 | ASN | 71 | 134.555 | 4.408  | 26.312 | 1.00159.29 |       | 1SG | 556 |
| ATOM | 556 | C   | ASN | 71 | 136.079 | 6.831  | 28.065 | 1.00159.29 |       | 1SG | 557 |
| ATOM | 557 | O   | ASN | 71 | 135.733 | 5.967  | 28.870 | 1.00159.29 |       | 1SG | 558 |
| ATOM | 558 | N   | ASP | 72 | 137.023 | 7.758  | 28.335 | 1.00192.67 |       | 1SG | 559 |
| ATOM | 559 | CA  | ASP | 72 | 137.768 | 7.721  | 29.557 | 1.00192.67 |       | 1SG | 560 |
| ATOM | 560 | CB  | ASP | 72 | 136.903 | 7.984  | 30.799 | 1.00192.67 |       | 1SG | 561 |
| ATOM | 561 | CG  | ASP | 72 | 136.508 | 9.455  | 30.784 | 1.00192.67 |       | 1SG | 562 |
| ATOM | 562 | OD1 | ASP | 72 | 137.222 | 10.253 | 30.119 | 1.00192.67 |       | 1SG | 563 |
| ATOM | 563 | OD2 | ASP | 72 | 135.489 | 9.803  | 31.437 | 1.00192.67 |       | 1SG | 564 |
| ATOM | 564 | C   | ASP | 72 | 138.335 | 6.350  | 29.636 | 1.00192.67 |       | 1SG | 565 |
| ATOM | 565 | O   | ASP | 72 | 138.267 | 5.681  | 30.667 | 1.00192.67 |       | 1SG | 566 |
| ATOM | 566 | N   | SER | 73 | 138.917 | 5.908  | 28.509 | 1.00121.09 |       | 1SG | 567 |



## Supplementary material 1.txt

|      |     |     |     |    |         |        |        |            |     |     |
|------|-----|-----|-----|----|---------|--------|--------|------------|-----|-----|
| ATOM | 567 | CA  | SER | 73 | 139.420 | 4.575  | 28.398 | 1.00121.09 | 1SG | 568 |
| ATOM | 568 | CB  | SER | 73 | 140.084 | 4.304  | 27.039 | 1.00121.09 | 1SG | 569 |
| ATOM | 569 | OG  | SER | 73 | 139.137 | 4.469  | 25.995 | 1.00121.09 | 1SG | 570 |
| ATOM | 570 | C   | SER | 73 | 140.458 | 4.348  | 29.444 | 1.00121.09 | 1SG | 571 |
| ATOM | 571 | O   | SER | 73 | 140.340 | 3.444  | 30.269 | 1.00121.09 | 1SG | 572 |
| ATOM | 572 | N   | ASP | 74 | 141.503 | 5.190  | 29.446 | 1.00 73.81 | 1SG | 573 |
| ATOM | 573 | CA  | ASP | 74 | 142.577 | 5.022  | 30.376 | 1.00 73.81 | 1SG | 574 |
| ATOM | 574 | CB  | ASP | 74 | 143.715 | 6.034  | 30.138 | 1.00 73.81 | 1SG | 575 |
| ATOM | 575 | CG  | ASP | 74 | 144.863 | 5.757  | 31.104 | 1.00 73.81 | 1SG | 576 |
| ATOM | 576 | OD1 | ASP | 74 | 144.649 | 5.853  | 32.343 | 1.00 73.81 | 1SG | 577 |
| ATOM | 577 | OD2 | ASP | 74 | 145.983 | 5.461  | 30.609 | 1.00 73.81 | 1SG | 578 |
| ATOM | 578 | C   | ASP | 74 | 142.047 | 5.243  | 31.752 | 1.00 73.81 | 1SG | 579 |
| ATOM | 579 | O   | ASP | 74 | 142.424 | 4.550  | 32.695 | 1.00 73.81 | 1SG | 580 |
| ATOM | 580 | N   | ARG | 75 | 141.136 | 6.219  | 31.887 | 1.00118.30 | 1SG | 581 |
| ATOM | 581 | CA  | ARG | 75 | 140.642 | 6.633  | 33.165 | 1.00118.30 | 1SG | 582 |
| ATOM | 582 | CB  | ARG | 75 | 139.894 | 7.969  | 33.077 | 1.00118.30 | 1SG | 583 |
| ATOM | 583 | CG  | ARG | 75 | 139.616 | 8.628  | 34.422 | 1.00118.30 | 1SG | 584 |
| ATOM | 584 | CD  | ARG | 75 | 138.837 | 9.931  | 34.272 | 1.00118.30 | 1SG | 585 |
| ATOM | 585 | NE  | ARG | 75 | 139.608 | 10.811 | 33.353 | 1.00118.30 | 1SG | 586 |
| ATOM | 586 | CZ  | ARG | 75 | 140.620 | 11.574 | 33.851 | 1.00118.30 | 1SG | 587 |
| ATOM | 587 | NH1 | ARG | 75 | 140.955 | 11.471 | 35.171 | 1.00118.30 | 1SG | 588 |
| ATOM | 588 | NH2 | ARG | 75 | 141.296 | 12.434 | 33.036 | 1.00118.30 | 1SG | 589 |
| ATOM | 589 | C   | ARG | 75 | 139.696 | 5.621  | 33.734 | 1.00118.30 | 1SG | 590 |
| ATOM | 590 | O   | ARG | 75 | 138.945 | 4.969  | 33.011 | 1.00118.30 | 1SG | 591 |
| ATOM | 591 | N   | ASP | 76 | 139.727 | 5.471  | 35.076 | 1.00 34.83 | 1SG | 592 |
| ATOM | 592 | CA  | ASP | 76 | 138.856 | 4.571  | 35.780 | 1.00 34.83 | 1SG | 593 |
| ATOM | 593 | CB  | ASP | 76 | 139.366 | 4.214  | 37.188 | 1.00 34.83 | 1SG | 594 |
| ATOM | 594 | CG  | ASP | 76 | 140.664 | 3.433  | 37.048 | 1.00 34.83 | 1SG | 595 |
| ATOM | 595 | OD1 | ASP | 76 | 140.969 | 2.994  | 35.908 | 1.00 34.83 | 1SG | 596 |
| ATOM | 596 | OD2 | ASP | 76 | 141.367 | 3.267  | 38.080 | 1.00 34.83 | 1SG | 597 |
| ATOM | 597 | C   | ASP | 76 | 137.546 | 5.276  | 35.965 | 1.00 34.83 | 1SG | 598 |
| ATOM | 598 | O   | ASP | 76 | 137.439 | 6.478  | 35.730 | 1.00 34.83 | 1SG | 599 |
| ATOM | 599 | N   | LEU | 77 | 136.499 | 4.531  | 36.377 | 1.00103.14 | 1SG | 600 |
| ATOM | 600 | CA  | LEU | 77 | 135.211 | 5.126  | 36.595 | 1.00103.14 | 1SG | 601 |
| ATOM | 601 | CB  | LEU | 77 | 134.133 | 4.068  | 36.928 | 1.00103.14 | 1SG | 602 |
| ATOM | 602 | CG  | LEU | 77 | 132.669 | 4.564  | 37.033 | 1.00103.14 | 1SG | 603 |
| ATOM | 603 | CD2 | LEU | 77 | 132.463 | 5.657  | 38.092 | 1.00103.14 | 1SG | 604 |
| ATOM | 604 | CD1 | LEU | 77 | 131.725 | 3.384  | 37.296 | 1.00103.14 | 1SG | 605 |
| ATOM | 605 | C   | LEU | 77 | 135.343 | 6.075  | 37.744 | 1.00103.14 | 1SG | 606 |
| ATOM | 606 | O   | LEU | 77 | 134.873 | 7.210  | 37.684 | 1.00103.14 | 1SG | 607 |
| ATOM | 607 | N   | ILE | 78 | 136.033 | 5.635  | 38.811 | 1.00 93.27 | 1SG | 608 |
| ATOM | 608 | CA  | ILE | 78 | 136.156 | 6.419  | 40.005 | 1.00 93.27 | 1SG | 609 |
| ATOM | 609 | CB  | ILE | 78 | 137.030 | 5.758  | 41.031 | 1.00 93.27 | 1SG | 610 |
| ATOM | 610 | CG2 | ILE | 78 | 137.064 | 6.672  | 42.268 | 1.00 93.27 | 1SG | 611 |
| ATOM | 611 | CG1 | ILE | 78 | 136.558 | 4.325  | 41.327 | 1.00 93.27 | 1SG | 612 |
| ATOM | 612 | CD1 | ILE | 78 | 135.129 | 4.234  | 41.850 | 1.00 93.27 | 1SG | 613 |
| ATOM | 613 | C   | ILE | 78 | 136.864 | 7.688  | 39.653 | 1.00 93.27 | 1SG | 614 |
| ATOM | 614 | O   | ILE | 78 | 136.449 | 8.775  | 40.052 | 1.00 93.27 | 1SG | 615 |
| ATOM | 615 | N   | LYS | 79 | 137.961 | 7.572  | 38.882 | 1.00132.37 | 1SG | 616 |
| ATOM | 616 | CA  | LYS | 79 | 138.764 | 8.712  | 38.543 | 1.00132.37 | 1SG | 617 |
| ATOM | 617 | CB  | LYS | 79 | 140.036 | 8.346  | 37.761 | 1.00132.37 | 1SG | 618 |
| ATOM | 618 | CG  | LYS | 79 | 141.016 | 9.515  | 37.632 | 1.00132.37 | 1SG | 619 |
| ATOM | 619 | CD  | LYS | 79 | 141.654 | 9.920  | 38.963 | 1.00132.37 | 1SG | 620 |
| ATOM | 620 | CE  | LYS | 79 | 140.658 | 10.516 | 39.961 | 1.00132.37 | 1SG | 621 |
| ATOM | 621 | NZ  | LYS | 79 | 141.344 | 10.828 | 41.235 | 1.00132.37 | 1SG | 622 |
| ATOM | 622 | C   | LYS | 79 | 137.968 | 9.659  | 37.698 | 1.00132.37 | 1SG | 623 |
| ATOM | 623 | O   | LYS | 79 | 138.074 | 10.874 | 37.856 | 1.00132.37 | 1SG | 624 |
| ATOM | 624 | N   | ARG | 80 | 137.156 | 9.123  | 36.767 | 1.00164.81 | 1SG | 625 |
| ATOM | 625 | CA  | ARG | 80 | 136.375 | 9.945  | 35.883 | 1.00164.81 | 1SG | 626 |
| ATOM | 626 | CB  | ARG | 80 | 135.519 | 9.116  | 34.913 | 1.00164.81 | 1SG | 627 |
| ATOM | 627 | CG  | ARG | 80 | 134.607 | 9.973  | 34.032 | 1.00164.81 | 1SG | 628 |
| ATOM | 628 | CD  | ARG | 80 | 133.367 | 9.240  | 33.507 | 1.00164.81 | 1SG | 629 |
| ATOM | 629 | NE  | ARG | 80 | 133.809 | 8.118  | 32.630 | 1.00164.81 | 1SG | 630 |
| ATOM | 630 | CZ  | ARG | 80 | 134.077 | 6.886  | 33.156 | 1.00164.81 | 1SG | 631 |
| ATOM | 631 | NH1 | ARG | 80 | 133.983 | 6.676  | 34.501 | 1.00164.81 | 1SG | 632 |
| ATOM | 632 | NH2 | ARG | 80 | 134.441 | 5.862  | 32.329 | 1.00164.81 | 1SG | 633 |
| ATOM | 633 | C   | ARG | 80 | 135.404 | 10.759 | 36.675 | 1.00164.81 | 1SG | 634 |
| ATOM | 634 | O   | ARG | 80 | 135.237 | 11.953 | 36.430 | 1.00164.81 | 1SG | 635 |
| ATOM | 635 | N   | LEU | 81 | 134.723 | 10.121 | 37.642 | 1.00 52.45 | 1SG | 636 |
| ATOM | 636 | CA  | LEU | 81 | 133.731 | 10.804 | 38.424 | 1.00 52.45 | 1SG | 637 |
| ATOM | 637 | CB  | LEU | 81 | 132.992 | 9.880  | 39.413 | 1.00 52.45 | 1SG | 638 |

## Supplementary material 1.txt

|      |     |     |     |    |         |        |        |      |        |     |     |
|------|-----|-----|-----|----|---------|--------|--------|------|--------|-----|-----|
| ATOM | 638 | CG  | LEU | 81 | 132.211 | 8.734  | 38.740 | 1.00 | 52.45  | 1SG | 639 |
| ATOM | 639 | CD2 | LEU | 81 | 131.288 | 9.254  | 37.627 | 1.00 | 52.45  | 1SG | 640 |
| ATOM | 640 | CD1 | LEU | 81 | 131.467 | 7.883  | 39.780 | 1.00 | 52.45  | 1SG | 641 |
| ATOM | 641 | C   | LEU | 81 | 134.398 | 11.863 | 39.242 | 1.00 | 52.45  | 1SG | 642 |
| ATOM | 642 | O   | LEU | 81 | 133.881 | 12.970 | 39.386 | 1.00 | 52.45  | 1SG | 643 |
| ATOM | 643 | N   | GLU | 82 | 135.572 | 11.540 | 39.811 | 1.00 | 65.26  | 1SG | 644 |
| ATOM | 644 | CA  | GLU | 82 | 136.257 | 12.465 | 40.665 | 1.00 | 65.26  | 1SG | 645 |
| ATOM | 645 | CB  | GLU | 82 | 137.527 | 11.866 | 41.290 | 1.00 | 65.26  | 1SG | 646 |
| ATOM | 646 | CG  | GLU | 82 | 137.239 | 10.752 | 42.297 | 1.00 | 65.26  | 1SG | 647 |
| ATOM | 647 | CD  | GLU | 82 | 136.596 | 11.387 | 43.522 | 1.00 | 65.26  | 1SG | 648 |
| ATOM | 648 | OE1 | GLU | 82 | 136.884 | 12.584 | 43.788 | 1.00 | 65.26  | 1SG | 649 |
| ATOM | 649 | OE2 | GLU | 82 | 135.805 | 10.683 | 44.205 | 1.00 | 65.26  | 1SG | 650 |
| ATOM | 650 | C   | GLU | 82 | 136.670 | 13.666 | 39.877 | 1.00 | 65.26  | 1SG | 651 |
| ATOM | 651 | O   | GLU | 82 | 136.548 | 14.793 | 40.354 | 1.00 | 65.26  | 1SG | 652 |
| ATOM | 652 | N   | ILE | 83 | 137.170 | 13.468 | 38.643 | 1.00 | 85.41  | 1SG | 653 |
| ATOM | 653 | CA  | ILE | 83 | 137.637 | 14.596 | 37.888 | 1.00 | 85.41  | 1SG | 654 |
| ATOM | 654 | CB  | ILE | 83 | 138.328 | 14.219 | 36.604 | 1.00 | 85.41  | 1SG | 655 |
| ATOM | 655 | CG2 | ILE | 83 | 137.311 | 13.571 | 35.653 | 1.00 | 85.41  | 1SG | 656 |
| ATOM | 656 | CG1 | ILE | 83 | 139.045 | 15.443 | 36.012 | 1.00 | 85.41  | 1SG | 657 |
| ATOM | 657 | CD1 | ILE | 83 | 140.031 | 15.093 | 34.899 | 1.00 | 85.41  | 1SG | 658 |
| ATOM | 658 | C   | ILE | 83 | 136.490 | 15.513 | 37.575 | 1.00 | 85.41  | 1SG | 659 |
| ATOM | 659 | O   | ILE | 83 | 136.600 | 16.725 | 37.756 | 1.00 | 85.41  | 1SG | 660 |
| ATOM | 660 | N   | VAL | 84 | 135.346 | 14.961 | 37.122 | 1.00 | 95.11  | 1SG | 661 |
| ATOM | 661 | CA  | VAL | 84 | 134.218 | 15.778 | 36.774 | 1.00 | 95.11  | 1SG | 662 |
| ATOM | 662 | CB  | VAL | 84 | 133.071 | 15.008 | 36.182 | 1.00 | 95.11  | 1SG | 663 |
| ATOM | 663 | CG1 | VAL | 84 | 133.540 | 14.371 | 34.863 | 1.00 | 95.11  | 1SG | 664 |
| ATOM | 664 | CG2 | VAL | 84 | 132.556 | 13.995 | 37.216 | 1.00 | 95.11  | 1SG | 665 |
| ATOM | 665 | C   | VAL | 84 | 133.723 | 16.494 | 37.993 | 1.00 | 95.11  | 1SG | 666 |
| ATOM | 666 | O   | VAL | 84 | 133.338 | 17.660 | 37.925 | 1.00 | 95.11  | 1SG | 667 |
| ATOM | 667 | N   | ASP | 85 | 133.710 | 15.811 | 39.151 | 1.00 | 49.31  | 1SG | 668 |
| ATOM | 668 | CA  | ASP | 85 | 133.221 | 16.404 | 40.365 | 1.00 | 49.31  | 1SG | 669 |
| ATOM | 669 | CB  | ASP | 85 | 133.251 | 15.415 | 41.545 | 1.00 | 49.31  | 1SG | 670 |
| ATOM | 670 | CG  | ASP | 85 | 132.544 | 16.044 | 42.737 | 1.00 | 49.31  | 1SG | 671 |
| ATOM | 671 | OD1 | ASP | 85 | 131.936 | 17.133 | 42.562 | 1.00 | 49.31  | 1SG | 672 |
| ATOM | 672 | OD2 | ASP | 85 | 132.607 | 15.444 | 43.843 | 1.00 | 49.31  | 1SG | 673 |
| ATOM | 673 | C   | ASP | 85 | 134.085 | 17.579 | 40.739 | 1.00 | 49.31  | 1SG | 674 |
| ATOM | 674 | O   | ASP | 85 | 133.576 | 18.641 | 41.098 | 1.00 | 49.31  | 1SG | 675 |
| ATOM | 675 | N   | THR | 86 | 135.421 | 17.418 | 40.651 | 1.00 | 108.62 | 1SG | 676 |
| ATOM | 676 | CA  | THR | 86 | 136.350 | 18.439 | 41.054 | 1.00 | 108.62 | 1SG | 677 |
| ATOM | 677 | CB  | THR | 86 | 137.776 | 17.978 | 40.997 | 1.00 | 108.62 | 1SG | 678 |
| ATOM | 678 | OG1 | THR | 86 | 138.139 | 17.666 | 39.660 | 1.00 | 108.62 | 1SG | 679 |
| ATOM | 679 | CG2 | THR | 86 | 137.925 | 16.736 | 41.891 | 1.00 | 108.62 | 1SG | 680 |
| ATOM | 680 | C   | THR | 86 | 136.229 | 19.643 | 40.173 | 1.00 | 108.62 | 1SG | 681 |
| ATOM | 681 | O   | THR | 86 | 136.226 | 20.776 | 40.656 | 1.00 | 108.62 | 1SG | 682 |
| ATOM | 682 | N   | VAL | 87 | 136.123 | 19.426 | 38.848 | 1.00 | 99.85  | 1SG | 683 |
| ATOM | 683 | CA  | VAL | 87 | 136.058 | 20.517 | 37.923 | 1.00 | 99.85  | 1SG | 684 |
| ATOM | 684 | CB  | VAL | 87 | 136.014 | 20.080 | 36.484 | 1.00 | 99.85  | 1SG | 685 |
| ATOM | 685 | CG1 | VAL | 87 | 137.294 | 19.285 | 36.177 | 1.00 | 99.85  | 1SG | 686 |
| ATOM | 686 | CG2 | VAL | 87 | 134.708 | 19.313 | 36.225 | 1.00 | 99.85  | 1SG | 687 |
| ATOM | 687 | C   | VAL | 87 | 134.817 | 21.308 | 38.197 | 1.00 | 99.85  | 1SG | 688 |
| ATOM | 688 | O   | VAL | 87 | 134.821 | 22.533 | 38.086 | 1.00 | 99.85  | 1SG | 689 |
| ATOM | 689 | N   | GLU | 88 | 133.706 | 20.620 | 38.527 | 1.00 | 49.07  | 1SG | 690 |
| ATOM | 690 | CA  | GLU | 88 | 132.454 | 21.279 | 38.779 | 1.00 | 49.07  | 1SG | 691 |
| ATOM | 691 | CB  | GLU | 88 | 131.287 | 20.279 | 38.898 | 1.00 | 49.07  | 1SG | 692 |
| ATOM | 692 | CG  | GLU | 88 | 131.021 | 19.548 | 37.576 | 1.00 | 49.07  | 1SG | 693 |
| ATOM | 693 | CD  | GLU | 88 | 129.862 | 18.574 | 37.750 | 1.00 | 49.07  | 1SG | 694 |
| ATOM | 694 | OE1 | GLU | 88 | 129.373 | 18.425 | 38.901 | 1.00 | 49.07  | 1SG | 695 |
| ATOM | 695 | OE2 | GLU | 88 | 129.449 | 17.967 | 36.725 | 1.00 | 49.07  | 1SG | 696 |
| ATOM | 696 | C   | GLU | 88 | 132.529 | 22.118 | 40.025 | 1.00 | 49.07  | 1SG | 697 |
| ATOM | 697 | O   | GLU | 88 | 132.084 | 23.265 | 40.029 | 1.00 | 49.07  | 1SG | 698 |
| ATOM | 698 | N   | CYS | 89 | 133.123 | 21.582 | 41.108 | 1.00 | 48.53  | 1SG | 699 |
| ATOM | 699 | CA  | CYS | 89 | 133.202 | 22.274 | 42.369 | 1.00 | 48.53  | 1SG | 700 |
| ATOM | 700 | CB  | CYS | 89 | 133.819 | 21.412 | 43.481 | 1.00 | 48.53  | 1SG | 701 |
| ATOM | 701 | SG  | CYS | 89 | 132.781 | 19.979 | 43.896 | 1.00 | 48.53  | 1SG | 702 |
| ATOM | 702 | C   | CYS | 89 | 134.063 | 23.497 | 42.214 | 1.00 | 48.53  | 1SG | 703 |
| ATOM | 703 | O   | CYS | 89 | 133.869 | 24.507 | 42.892 | 1.00 | 48.53  | 1SG | 704 |
| ATOM | 704 | N   | LEU | 90 | 135.071 | 23.402 | 41.330 | 1.00 | 83.96  | 1SG | 705 |
| ATOM | 705 | CA  | LEU | 90 | 136.021 | 24.443 | 41.041 | 1.00 | 83.96  | 1SG | 706 |
| ATOM | 706 | CB  | LEU | 90 | 137.174 | 23.957 | 40.142 | 1.00 | 83.96  | 1SG | 707 |
| ATOM | 707 | CG  | LEU | 90 | 138.071 | 22.912 | 40.832 | 1.00 | 83.96  | 1SG | 708 |
| ATOM | 708 | CD2 | LEU | 90 | 138.581 | 23.427 | 42.188 | 1.00 | 83.96  | 1SG | 709 |

## Supplementary material 1.txt

|      |     |     |     |    |         |        |        |      |        |     |     |
|------|-----|-----|-----|----|---------|--------|--------|------|--------|-----|-----|
| ATOM | 709 | CD1 | LEU | 90 | 139.211 | 22.449 | 39.909 | 1.00 | 83.96  | 1SG | 710 |
| ATOM | 710 | C   | LEU | 90 | 135.334 | 25.595 | 40.362 | 1.00 | 83.96  | 1SG | 711 |
| ATOM | 711 | O   | LEU | 90 | 135.869 | 26.703 | 40.340 | 1.00 | 83.96  | 1SG | 712 |
| ATOM | 712 | N   | GLY | 91 | 134.180 | 25.345 | 39.706 | 1.00 | 47.68  | 1SG | 713 |
| ATOM | 713 | CA  | GLY | 91 | 133.406 | 26.401 | 39.101 | 1.00 | 47.68  | 1SG | 714 |
| ATOM | 714 | C   | GLY | 91 | 133.805 | 26.603 | 37.664 | 1.00 | 47.68  | 1SG | 715 |
| ATOM | 715 | O   | GLY | 91 | 133.378 | 27.565 | 37.028 | 1.00 | 47.68  | 1SG | 716 |
| ATOM | 716 | N   | ILE | 92 | 134.719 | 25.755 | 37.164 | 1.00 | 117.17 | 1SG | 717 |
| ATOM | 717 | CA  | ILE | 92 | 135.236 | 25.699 | 35.820 | 1.00 | 117.17 | 1SG | 718 |
| ATOM | 718 | CB  | ILE | 92 | 136.631 | 25.145 | 35.752 | 1.00 | 117.17 | 1SG | 719 |
| ATOM | 719 | CG2 | ILE | 92 | 137.551 | 26.140 | 36.476 | 1.00 | 117.17 | 1SG | 720 |
| ATOM | 720 | CG1 | ILE | 92 | 136.698 | 23.710 | 36.294 | 1.00 | 117.17 | 1SG | 721 |
| ATOM | 721 | CD1 | ILE | 92 | 138.069 | 23.063 | 36.100 | 1.00 | 117.17 | 1SG | 722 |
| ATOM | 722 | C   | ILE | 92 | 134.353 | 24.987 | 34.829 | 1.00 | 117.17 | 1SG | 723 |
| ATOM | 723 | O   | ILE | 92 | 134.500 | 25.181 | 33.625 | 1.00 | 117.17 | 1SG | 724 |
| ATOM | 724 | N   | ASP | 93 | 133.456 | 24.101 | 35.303 | 1.00 | 135.79 | 1SG | 725 |
| ATOM | 725 | CA  | ASP | 93 | 132.691 | 23.167 | 34.511 | 1.00 | 135.79 | 1SG | 726 |
| ATOM | 726 | CB  | ASP | 93 | 131.664 | 22.384 | 35.348 | 1.00 | 135.79 | 1SG | 727 |
| ATOM | 727 | CG  | ASP | 93 | 131.033 | 21.327 | 34.453 | 1.00 | 135.79 | 1SG | 728 |
| ATOM | 728 | OD1 | ASP | 93 | 131.753 | 20.796 | 33.566 | 1.00 | 135.79 | 1SG | 729 |
| ATOM | 729 | OD2 | ASP | 93 | 129.825 | 21.028 | 34.651 | 1.00 | 135.79 | 1SG | 730 |
| ATOM | 730 | C   | ASP | 93 | 131.929 | 23.820 | 33.389 | 1.00 | 135.79 | 1SG | 731 |
| ATOM | 731 | O   | ASP | 93 | 131.636 | 23.168 | 32.389 | 1.00 | 135.79 | 1SG | 732 |
| ATOM | 732 | N   | ARG | 94 | 131.585 | 25.111 | 33.501 | 1.00 | 178.21 | 1SG | 733 |
| ATOM | 733 | CA  | ARG | 94 | 130.780 | 25.788 | 32.518 | 1.00 | 178.21 | 1SG | 734 |
| ATOM | 734 | CB  | ARG | 94 | 130.586 | 27.283 | 32.814 | 1.00 | 178.21 | 1SG | 735 |
| ATOM | 735 | CG  | ARG | 94 | 129.885 | 28.002 | 31.663 | 1.00 | 178.21 | 1SG | 736 |
| ATOM | 736 | CD  | ARG | 94 | 130.006 | 29.524 | 31.707 | 1.00 | 178.21 | 1SG | 737 |
| ATOM | 737 | NE  | ARG | 94 | 131.446 | 29.877 | 31.559 | 1.00 | 178.21 | 1SG | 738 |
| ATOM | 738 | CZ  | ARG | 94 | 132.132 | 30.416 | 32.608 | 1.00 | 178.21 | 1SG | 739 |
| ATOM | 739 | NH1 | ARG | 94 | 131.495 | 30.669 | 33.789 | 1.00 | 178.21 | 1SG | 740 |
| ATOM | 740 | NH2 | ARG | 94 | 133.457 | 30.716 | 32.473 | 1.00 | 178.21 | 1SG | 741 |
| ATOM | 741 | C   | ARG | 94 | 131.413 | 25.723 | 31.156 | 1.00 | 178.21 | 1SG | 742 |
| ATOM | 742 | O   | ARG | 94 | 130.706 | 25.817 | 30.154 | 1.00 | 178.21 | 1SG | 743 |
| ATOM | 743 | N   | HIS | 95 | 132.757 | 25.662 | 31.076 | 1.00 | 82.00  | 1SG | 744 |
| ATOM | 744 | CA  | HIS | 95 | 133.461 | 25.612 | 29.820 | 1.00 | 82.00  | 1SG | 745 |
| ATOM | 745 | ND1 | HIS | 95 | 135.405 | 28.283 | 29.918 | 1.00 | 82.00  | 1SG | 746 |
| ATOM | 746 | CG  | HIS | 95 | 135.354 | 27.097 | 30.616 | 1.00 | 82.00  | 1SG | 747 |
| ATOM | 747 | CB  | HIS | 95 | 134.980 | 25.777 | 30.005 | 1.00 | 82.00  | 1SG | 748 |
| ATOM | 748 | NE2 | HIS | 95 | 135.969 | 28.759 | 32.015 | 1.00 | 82.00  | 1SG | 749 |
| ATOM | 749 | CD2 | HIS | 95 | 135.700 | 27.407 | 31.897 | 1.00 | 82.00  | 1SG | 750 |
| ATOM | 750 | CE1 | HIS | 95 | 135.778 | 29.243 | 30.801 | 1.00 | 82.00  | 1SG | 751 |
| ATOM | 751 | C   | HIS | 95 | 133.226 | 24.301 | 29.107 | 1.00 | 82.00  | 1SG | 752 |
| ATOM | 752 | O   | HIS | 95 | 133.180 | 24.235 | 27.881 | 1.00 | 82.00  | 1SG | 753 |
| ATOM | 753 | N   | PHE | 96 | 133.159 | 23.226 | 29.901 | 1.00 | 161.01 | 1SG | 754 |
| ATOM | 754 | CA  | PHE | 96 | 133.067 | 21.818 | 29.628 | 1.00 | 161.01 | 1SG | 755 |
| ATOM | 755 | CB  | PHE | 96 | 133.850 | 21.007 | 30.655 | 1.00 | 161.01 | 1SG | 756 |
| ATOM | 756 | CG  | PHE | 96 | 135.245 | 21.438 | 30.400 | 1.00 | 161.01 | 1SG | 757 |
| ATOM | 757 | CD1 | PHE | 96 | 135.968 | 20.867 | 29.382 | 1.00 | 161.01 | 1SG | 758 |
| ATOM | 758 | CD2 | PHE | 96 | 135.815 | 22.426 | 31.162 | 1.00 | 161.01 | 1SG | 759 |
| ATOM | 759 | CE1 | PHE | 96 | 137.255 | 21.268 | 29.130 | 1.00 | 161.01 | 1SG | 760 |
| ATOM | 760 | CE2 | PHE | 96 | 137.101 | 22.831 | 30.914 | 1.00 | 161.01 | 1SG | 761 |
| ATOM | 761 | CZ  | PHE | 96 | 137.824 | 22.250 | 29.900 | 1.00 | 161.01 | 1SG | 762 |
| ATOM | 762 | C   | PHE | 96 | 131.713 | 21.211 | 29.415 | 1.00 | 161.01 | 1SG | 763 |
| ATOM | 763 | O   | PHE | 96 | 131.639 | 19.988 | 29.429 | 1.00 | 161.01 | 1SG | 764 |
| ATOM | 764 | N   | GLN | 97 | 130.607 | 21.973 | 29.345 | 1.00 | 122.07 | 1SG | 765 |
| ATOM | 765 | CA  | GLN | 97 | 129.288 | 21.387 | 29.358 | 1.00 | 122.07 | 1SG | 766 |
| ATOM | 766 | CB  | GLN | 97 | 128.199 | 22.422 | 29.027 | 1.00 | 122.07 | 1SG | 767 |
| ATOM | 767 | CG  | GLN | 97 | 128.216 | 23.641 | 29.952 | 1.00 | 122.07 | 1SG | 768 |
| ATOM | 768 | CD  | GLN | 97 | 127.919 | 23.174 | 31.367 | 1.00 | 122.07 | 1SG | 769 |
| ATOM | 769 | OE1 | GLN | 97 | 128.828 | 23.009 | 32.179 | 1.00 | 122.07 | 1SG | 770 |
| ATOM | 770 | NE2 | GLN | 97 | 126.613 | 22.947 | 31.672 | 1.00 | 122.07 | 1SG | 771 |
| ATOM | 771 | C   | GLN | 97 | 129.143 | 20.261 | 28.362 | 1.00 | 122.07 | 1SG | 772 |
| ATOM | 772 | O   | GLN | 97 | 128.588 | 19.230 | 28.735 | 1.00 | 122.07 | 1SG | 773 |
| ATOM | 773 | N   | PRO | 98 | 129.568 | 20.358 | 27.132 | 1.00 | 158.43 | 1SG | 774 |
| ATOM | 774 | CA  | PRO | 98 | 129.420 | 19.219 | 26.261 | 1.00 | 158.43 | 1SG | 775 |
| ATOM | 775 | CD  | PRO | 98 | 129.480 | 21.613 | 26.402 | 1.00 | 158.43 | 1SG | 776 |
| ATOM | 776 | CB  | PRO | 98 | 129.655 | 19.746 | 24.847 | 1.00 | 158.43 | 1SG | 777 |
| ATOM | 777 | CG  | PRO | 98 | 129.221 | 21.222 | 24.937 | 1.00 | 158.43 | 1SG | 778 |
| ATOM | 778 | C   | PRO | 98 | 130.242 | 18.005 | 26.606 | 1.00 | 158.43 | 1SG | 779 |
| ATOM | 779 | O   | PRO | 98 | 129.722 | 16.894 | 26.515 | 1.00 | 158.43 | 1SG | 780 |

## Supplementary material 1.txt

|      |     |     |     |     |         |        |        |            |       |     |     |
|------|-----|-----|-----|-----|---------|--------|--------|------------|-------|-----|-----|
| ATOM | 780 | N   | GLU | 99  | 131.515 | 18.186 | 27.011 | 1.00       | 79.18 | 1SG | 781 |
| ATOM | 781 | CA  | GLU | 99  | 132.391 | 17.082 | 27.292 | 1.00       | 79.18 | 1SG | 782 |
| ATOM | 782 | CB  | GLU | 99  | 133.828 | 17.520 | 27.625 | 1.00       | 79.18 | 1SG | 783 |
| ATOM | 783 | CG  | GLU | 99  | 134.606 | 18.052 | 26.419 | 1.00       | 79.18 | 1SG | 784 |
| ATOM | 784 | CD  | GLU | 99  | 134.127 | 19.465 | 26.113 | 1.00       | 79.18 | 1SG | 785 |
| ATOM | 785 | OE1 | GLU | 99  | 133.416 | 20.053 | 26.972 | 1.00       | 79.18 | 1SG | 786 |
| ATOM | 786 | OE2 | GLU | 99  | 134.470 | 19.976 | 25.014 | 1.00       | 79.18 | 1SG | 787 |
| ATOM | 787 | C   | GLU | 99  | 131.877 | 16.311 | 28.467 | 1.00       | 79.18 | 1SG | 788 |
| ATOM | 788 | O   | GLU | 99  | 131.847 | 15.082 | 28.443 | 1.00       | 79.18 | 1SG | 789 |
| ATOM | 789 | N   | ILE | 100 | 131.452 | 17.015 | 29.530 | 1.00106.18 |       | 1SG | 790 |
| ATOM | 790 | CA  | ILE | 100 | 130.958 | 16.353 | 30.701 | 1.00106.18 |       | 1SG | 791 |
| ATOM | 791 | CB  | ILE | 100 | 130.655 | 17.262 | 31.858 | 1.00106.18 |       | 1SG | 792 |
| ATOM | 792 | CG2 | ILE | 100 | 129.655 | 16.537 | 32.772 | 1.00106.18 |       | 1SG | 793 |
| ATOM | 793 | CG1 | ILE | 100 | 131.947 | 17.661 | 32.585 | 1.00106.18 |       | 1SG | 794 |
| ATOM | 794 | CD1 | ILE | 100 | 132.934 | 18.434 | 31.730 | 1.00106.18 |       | 1SG | 795 |
| ATOM | 795 | C   | ILE | 100 | 129.712 | 15.592 | 30.389 | 1.00106.18 |       | 1SG | 796 |
| ATOM | 796 | O   | ILE | 100 | 129.513 | 14.497 | 30.910 | 1.00106.18 |       | 1SG | 797 |
| ATOM | 797 | N   | LYS | 101 | 128.826 | 16.157 | 29.551 | 1.00123.20 |       | 1SG | 798 |
| ATOM | 798 | CA  | LYS | 101 | 127.577 | 15.504 | 29.289 | 1.00123.20 |       | 1SG | 799 |
| ATOM | 799 | CB  | LYS | 101 | 126.669 | 16.314 | 28.349 | 1.00123.20 |       | 1SG | 800 |
| ATOM | 800 | CG  | LYS | 101 | 125.274 | 15.710 | 28.172 | 1.00123.20 |       | 1SG | 801 |
| ATOM | 801 | CD  | LYS | 101 | 124.274 | 16.658 | 27.505 | 1.00123.20 |       | 1SG | 802 |
| ATOM | 802 | CE  | LYS | 101 | 123.896 | 17.859 | 28.373 | 1.00123.20 |       | 1SG | 803 |
| ATOM | 803 | NZ  | LYS | 101 | 123.191 | 17.402 | 29.591 | 1.00123.20 |       | 1SG | 804 |
| ATOM | 804 | C   | LYS | 101 | 127.816 | 14.171 | 28.649 | 1.00123.20 |       | 1SG | 805 |
| ATOM | 805 | O   | LYS | 101 | 127.259 | 13.160 | 29.076 | 1.00123.20 |       | 1SG | 806 |
| ATOM | 806 | N   | LEU | 102 | 128.695 | 14.124 | 27.634 | 1.00       | 40.72 | 1SG | 807 |
| ATOM | 807 | CA  | LEU | 102 | 128.896 | 12.910 | 26.898 | 1.00       | 40.72 | 1SG | 808 |
| ATOM | 808 | CB  | LEU | 102 | 129.896 | 13.076 | 25.740 | 1.00       | 40.72 | 1SG | 809 |
| ATOM | 809 | CG  | LEU | 102 | 129.418 | 14.066 | 24.661 | 1.00       | 40.72 | 1SG | 810 |
| ATOM | 810 | CD2 | LEU | 102 | 128.008 | 13.709 | 24.160 | 1.00       | 40.72 | 1SG | 811 |
| ATOM | 811 | CD1 | LEU | 102 | 130.444 | 14.198 | 23.523 | 1.00       | 40.72 | 1SG | 812 |
| ATOM | 812 | C   | LEU | 102 | 129.421 | 11.845 | 27.808 | 1.00       | 40.72 | 1SG | 813 |
| ATOM | 813 | O   | LEU | 102 | 128.999 | 10.694 | 27.721 | 1.00       | 40.72 | 1SG | 814 |
| ATOM | 814 | N   | ALA | 103 | 130.361 | 12.196 | 28.705 | 1.00       | 35.92 | 1SG | 815 |
| ATOM | 815 | CA  | ALA | 103 | 130.953 | 11.214 | 29.571 | 1.00       | 35.92 | 1SG | 816 |
| ATOM | 816 | CB  | ALA | 103 | 132.063 | 11.799 | 30.460 | 1.00       | 35.92 | 1SG | 817 |
| ATOM | 817 | C   | ALA | 103 | 129.907 | 10.634 | 30.477 | 1.00       | 35.92 | 1SG | 818 |
| ATOM | 818 | O   | ALA | 103 | 129.843 | 9.420  | 30.666 | 1.00       | 35.92 | 1SG | 819 |
| ATOM | 819 | N   | LEU | 104 | 129.054 | 11.494 | 31.064 | 1.00       | 51.83 | 1SG | 820 |
| ATOM | 820 | CA  | LEU | 104 | 128.015 | 11.039 | 31.943 | 1.00       | 51.83 | 1SG | 821 |
| ATOM | 821 | CB  | LEU | 104 | 127.264 | 12.190 | 32.626 | 1.00       | 51.83 | 1SG | 822 |
| ATOM | 822 | CG  | LEU | 104 | 128.147 | 12.976 | 33.611 | 1.00       | 51.83 | 1SG | 823 |
| ATOM | 823 | CD2 | LEU | 104 | 128.798 | 12.050 | 34.652 | 1.00       | 51.83 | 1SG | 824 |
| ATOM | 824 | CD1 | LEU | 104 | 127.356 | 14.112 | 34.271 | 1.00       | 51.83 | 1SG | 825 |
| ATOM | 825 | C   | LEU | 104 | 127.040 | 10.256 | 31.132 | 1.00       | 51.83 | 1SG | 826 |
| ATOM | 826 | O   | LEU | 104 | 126.438 | 9.295  | 31.613 | 1.00       | 51.83 | 1SG | 827 |
| ATOM | 827 | N   | ASP | 105 | 126.848 | 10.692 | 29.873 | 1.00       | 88.00 | 1SG | 828 |
| ATOM | 828 | CA  | ASP | 105 | 125.978 | 10.046 | 28.937 | 1.00       | 88.00 | 1SG | 829 |
| ATOM | 829 | CB  | ASP | 105 | 125.914 | 10.757 | 27.572 | 1.00       | 88.00 | 1SG | 830 |
| ATOM | 830 | CG  | ASP | 105 | 124.983 | 11.958 | 27.653 | 1.00       | 88.00 | 1SG | 831 |
| ATOM | 831 | OD1 | ASP | 105 | 123.797 | 11.755 | 28.021 | 1.00       | 88.00 | 1SG | 832 |
| ATOM | 832 | OD2 | ASP | 105 | 125.431 | 13.089 | 27.323 | 1.00       | 88.00 | 1SG | 833 |
| ATOM | 833 | C   | ASP | 105 | 126.522 | 8.686  | 28.668 | 1.00       | 88.00 | 1SG | 834 |
| ATOM | 834 | O   | ASP | 105 | 125.759 | 7.768  | 28.404 | 1.00       | 88.00 | 1SG | 835 |
| ATOM | 835 | N   | TYR | 106 | 127.856 | 8.527  | 28.651 | 1.00       | 47.22 | 1SG | 836 |
| ATOM | 836 | CA  | TYR | 106 | 128.438 | 7.234  | 28.425 | 1.00       | 47.22 | 1SG | 837 |
| ATOM | 837 | CB  | TYR | 106 | 129.972 | 7.318  | 28.323 | 1.00       | 47.22 | 1SG | 838 |
| ATOM | 838 | CG  | TYR | 106 | 130.528 | 5.940  | 28.228 | 1.00       | 47.22 | 1SG | 839 |
| ATOM | 839 | CD1 | TYR | 106 | 130.576 | 5.282  | 27.022 | 1.00       | 47.22 | 1SG | 840 |
| ATOM | 840 | CD2 | TYR | 106 | 131.012 | 5.311  | 29.352 | 1.00       | 47.22 | 1SG | 841 |
| ATOM | 841 | CE1 | TYR | 106 | 131.095 | 4.011  | 26.940 | 1.00       | 47.22 | 1SG | 842 |
| ATOM | 842 | CE2 | TYR | 106 | 131.531 | 4.041  | 29.276 | 1.00       | 47.22 | 1SG | 843 |
| ATOM | 843 | CZ  | TYR | 106 | 131.571 | 3.390  | 28.068 | 1.00       | 47.22 | 1SG | 844 |
| ATOM | 844 | OH  | TYR | 106 | 132.104 | 2.086  | 27.988 | 1.00       | 47.22 | 1SG | 845 |
| ATOM | 845 | C   | TYR | 106 | 128.108 | 6.346  | 29.587 | 1.00       | 47.22 | 1SG | 846 |
| ATOM | 846 | O   | TYR | 106 | 127.656 | 5.215  | 29.414 | 1.00       | 47.22 | 1SG | 847 |
| ATOM | 847 | N   | VAL | 107 | 128.315 | 6.865  | 30.813 | 1.00       | 43.46 | 1SG | 848 |
| ATOM | 848 | CA  | VAL | 107 | 128.099 | 6.109  | 32.015 | 1.00       | 43.46 | 1SG | 849 |
| ATOM | 849 | CB  | VAL | 107 | 128.478 | 6.870  | 33.251 | 1.00       | 43.46 | 1SG | 850 |
| ATOM | 850 | CG1 | VAL | 107 | 128.103 | 6.029  | 34.483 | 1.00       | 43.46 | 1SG | 851 |

## Supplementary material 1.txt

|      |     |     |     |     |         |        |        |            |       |     |     |
|------|-----|-----|-----|-----|---------|--------|--------|------------|-------|-----|-----|
| ATOM | 851 | CG2 | VAL | 107 | 129.971 | 7.226  | 33.166 | 1.00       | 43.46 | 1SG | 852 |
| ATOM | 852 | C   | VAL | 107 | 126.643 | 5.769  | 32.135 | 1.00       | 43.46 | 1SG | 853 |
| ATOM | 853 | O   | VAL | 107 | 126.285 | 4.655  | 32.512 | 1.00       | 43.46 | 1SG | 854 |
| ATOM | 854 | N   | TYR | 108 | 125.779 | 6.762  | 31.861 | 1.00111.39 |       | 1SG | 855 |
| ATOM | 855 | CA  | TYR | 108 | 124.342 | 6.694  | 31.922 | 1.00111.39 |       | 1SG | 856 |
| ATOM | 856 | CB  | TYR | 108 | 123.685 | 8.083  | 31.860 | 1.00111.39 |       | 1SG | 857 |
| ATOM | 857 | CG  | TYR | 108 | 122.206 | 7.894  | 31.822 | 1.00111.39 |       | 1SG | 858 |
| ATOM | 858 | CD1 | TYR | 108 | 121.497 | 7.632  | 32.972 | 1.00111.39 |       | 1SG | 859 |
| ATOM | 859 | CD2 | TYR | 108 | 121.526 | 7.990  | 30.630 | 1.00111.39 |       | 1SG | 860 |
| ATOM | 860 | CE1 | TYR | 108 | 120.133 | 7.460  | 32.929 | 1.00111.39 |       | 1SG | 861 |
| ATOM | 861 | CE2 | TYR | 108 | 120.163 | 7.819  | 30.580 | 1.00111.39 |       | 1SG | 862 |
| ATOM | 862 | CZ  | TYR | 108 | 119.464 | 7.556  | 31.733 | 1.00111.39 |       | 1SG | 863 |
| ATOM | 863 | OH  | TYR | 108 | 118.065 | 7.381  | 31.690 | 1.00111.39 |       | 1SG | 864 |
| ATOM | 864 | C   | TYR | 108 | 123.759 | 5.885  | 30.803 | 1.00111.39 |       | 1SG | 865 |
| ATOM | 865 | O   | TYR | 108 | 122.706 | 5.276  | 30.965 | 1.00111.39 |       | 1SG | 866 |
| ATOM | 866 | N   | ARG | 109 | 124.390 | 5.966  | 29.618 | 1.00265.47 |       | 1SG | 867 |
| ATOM | 867 | CA  | ARG | 109 | 124.040 | 5.348  | 28.365 | 1.00265.47 |       | 1SG | 868 |
| ATOM | 868 | CB  | ARG | 109 | 124.592 | 3.934  | 28.101 | 1.00265.47 |       | 1SG | 869 |
| ATOM | 869 | CG  | ARG | 109 | 126.037 | 3.910  | 27.603 | 1.00265.47 |       | 1SG | 870 |
| ATOM | 870 | CD  | ARG | 109 | 126.140 | 4.106  | 26.088 | 1.00265.47 |       | 1SG | 871 |
| ATOM | 871 | NE  | ARG | 109 | 127.581 | 4.065  | 25.712 | 1.00265.47 |       | 1SG | 872 |
| ATOM | 872 | CZ  | ARG | 109 | 127.952 | 4.233  | 24.409 | 1.00265.47 |       | 1SG | 873 |
| ATOM | 873 | NH1 | ARG | 109 | 127.010 | 4.487  | 23.453 | 1.00265.47 |       | 1SG | 874 |
| ATOM | 874 | NH2 | ARG | 109 | 129.269 | 4.153  | 24.059 | 1.00265.47 |       | 1SG | 875 |
| ATOM | 875 | C   | ARG | 109 | 122.572 | 5.370  | 28.114 | 1.00265.47 |       | 1SG | 876 |
| ATOM | 876 | O   | ARG | 109 | 121.895 | 4.352  | 28.248 | 1.00265.47 |       | 1SG | 877 |
| ATOM | 877 | N   | CYS | 110 | 122.034 | 6.549  | 27.752 | 1.00115.27 |       | 1SG | 878 |
| ATOM | 878 | CA  | CYS | 110 | 120.645 | 6.609  | 27.412 | 1.00115.27 |       | 1SG | 879 |
| ATOM | 879 | CB  | CYS | 110 | 120.129 | 8.038  | 27.171 | 1.00115.27 |       | 1SG | 880 |
| ATOM | 880 | SG  | CYS | 110 | 118.361 | 8.080  | 26.746 | 1.00115.27 |       | 1SG | 881 |
| ATOM | 881 | C   | CYS | 110 | 120.494 | 5.851  | 26.134 | 1.00115.27 |       | 1SG | 882 |
| ATOM | 882 | O   | CYS | 110 | 121.361 | 5.906  | 25.264 | 1.00115.27 |       | 1SG | 883 |
| ATOM | 883 | N   | TRP | 111 | 119.387 | 5.098  | 25.999 | 1.00271.66 |       | 1SG | 884 |
| ATOM | 884 | CA  | TRP | 111 | 119.184 | 4.325  | 24.810 | 1.00271.66 |       | 1SG | 885 |
| ATOM | 885 | CB  | TRP | 111 | 119.389 | 2.816  | 25.045 | 1.00271.66 |       | 1SG | 886 |
| ATOM | 886 | CG  | TRP | 111 | 119.268 | 1.933  | 23.826 | 1.00271.66 |       | 1SG | 887 |
| ATOM | 887 | CD2 | TRP | 111 | 119.065 | 0.514  | 23.900 | 1.00271.66 |       | 1SG | 888 |
| ATOM | 888 | CD1 | TRP | 111 | 119.319 | 2.246  | 22.498 | 1.00271.66 |       | 1SG | 889 |
| ATOM | 889 | NE1 | TRP | 111 | 119.162 | 1.110  | 21.741 | 1.00271.66 |       | 1SG | 890 |
| ATOM | 890 | CE2 | TRP | 111 | 119.004 | 0.036  | 22.592 | 1.00271.66 |       | 1SG | 891 |
| ATOM | 891 | CE3 | TRP | 111 | 118.939 | -0.321 | 24.973 | 1.00271.66 |       | 1SG | 892 |
| ATOM | 892 | CZ2 | TRP | 111 | 118.816 | -1.292 | 22.336 | 1.00271.66 |       | 1SG | 893 |
| ATOM | 893 | CZ3 | TRP | 111 | 118.749 | -1.659 | 24.711 | 1.00271.66 |       | 1SG | 894 |
| ATOM | 894 | CH2 | TRP | 111 | 118.688 | -2.135 | 23.417 | 1.00271.66 |       | 1SG | 895 |
| ATOM | 895 | C   | TRP | 111 | 117.760 | 4.526  | 24.402 | 1.00271.66 |       | 1SG | 896 |
| ATOM | 896 | O   | TRP | 111 | 116.926 | 4.929  | 25.210 | 1.00271.66 |       | 1SG | 897 |
| ATOM | 897 | N   | ASN | 112 | 117.451 | 4.272  | 23.116 | 1.00185.35 |       | 1SG | 898 |
| ATOM | 898 | CA  | ASN | 112 | 116.098 | 4.412  | 22.668 | 1.00185.35 |       | 1SG | 899 |
| ATOM | 899 | CB  | ASN | 112 | 115.969 | 4.820  | 21.189 | 1.00185.35 |       | 1SG | 900 |
| ATOM | 900 | CG  | ASN | 112 | 116.336 | 6.292  | 21.059 | 1.00185.35 |       | 1SG | 901 |
| ATOM | 901 | OD1 | ASN | 112 | 115.782 | 7.138  | 21.758 | 1.00185.35 |       | 1SG | 902 |
| ATOM | 902 | ND2 | ASN | 112 | 117.289 | 6.610  | 20.142 | 1.00185.35 |       | 1SG | 903 |
| ATOM | 903 | C   | ASN | 112 | 115.464 | 3.071  | 22.810 | 1.00185.35 |       | 1SG | 904 |
| ATOM | 904 | O   | ASN | 112 | 115.871 | 2.107  | 22.164 | 1.00185.35 |       | 1SG | 905 |
| ATOM | 905 | N   | GLU | 113 | 114.453 | 2.980  | 23.692 | 1.00318.80 |       | 1SG | 906 |
| ATOM | 906 | CA  | GLU | 113 | 113.777 | 1.738  | 23.905 | 1.00318.80 |       | 1SG | 907 |
| ATOM | 907 | CB  | GLU | 113 | 114.360 | 0.922  | 25.073 | 1.00318.80 |       | 1SG | 908 |
| ATOM | 908 | CG  | GLU | 113 | 113.862 | -0.524 | 25.136 | 1.00318.80 |       | 1SG | 909 |
| ATOM | 909 | CD  | GLU | 113 | 114.583 | -1.309 | 24.048 | 1.00318.80 |       | 1SG | 910 |
| ATOM | 910 | OE1 | GLU | 113 | 115.237 | -0.660 | 23.188 | 1.00318.80 |       | 1SG | 911 |
| ATOM | 911 | OE2 | GLU | 113 | 114.491 | -2.566 | 24.062 | 1.00318.80 |       | 1SG | 912 |
| ATOM | 912 | C   | GLU | 113 | 112.368 | 2.086  | 24.255 | 1.00318.80 |       | 1SG | 913 |
| ATOM | 913 | O   | GLU | 113 | 112.059 | 3.247  | 24.520 | 1.00318.80 |       | 1SG | 914 |
| ATOM | 914 | N   | ARG | 114 | 111.463 | 1.090  | 24.236 | 1.00269.60 |       | 1SG | 915 |
| ATOM | 915 | CA  | ARG | 114 | 110.111 | 1.381  | 24.604 | 1.00269.60 |       | 1SG | 916 |
| ATOM | 916 | CB  | ARG | 114 | 109.049 | 0.655  | 23.759 | 1.00269.60 |       | 1SG | 917 |
| ATOM | 917 | CG  | ARG | 114 | 107.611 | 0.981  | 24.171 | 1.00269.60 |       | 1SG | 918 |
| ATOM | 918 | CD  | ARG | 114 | 106.952 | -0.097 | 25.035 | 1.00269.60 |       | 1SG | 919 |
| ATOM | 919 | NE  | ARG | 114 | 105.569 | 0.358  | 25.353 | 1.00269.60 |       | 1SG | 920 |
| ATOM | 920 | CZ  | ARG | 114 | 105.216 | 0.650  | 26.640 | 1.00269.60 |       | 1SG | 921 |
| ATOM | 921 | NH1 | ARG | 114 | 106.118 | 0.492  | 27.652 | 1.00269.60 |       | 1SG | 922 |

## Supplementary material 1.txt

|      |     |     |     |     |         |        |        |            |     |     |
|------|-----|-----|-----|-----|---------|--------|--------|------------|-----|-----|
| ATOM | 922 | NH2 | ARG | 114 | 103.955 | 1.093  | 26.914 | 1.00269.60 | 1SG | 923 |
| ATOM | 923 | C   | ARG | 114 | 109.937 | 0.922  | 26.011 | 1.00269.60 | 1SG | 924 |
| ATOM | 924 | O   | ARG | 114 | 110.563 | -0.045 | 26.444 | 1.00269.60 | 1SG | 925 |
| ATOM | 925 | N   | GLY | 115 | 109.091 | 1.635  | 26.775 | 1.00 77.20 | 1SG | 926 |
| ATOM | 926 | CA  | GLY | 115 | 108.861 | 1.254  | 28.135 | 1.00 77.20 | 1SG | 927 |
| ATOM | 927 | C   | GLY | 115 | 110.116 | 1.535  | 28.888 | 1.00 77.20 | 1SG | 928 |
| ATOM | 928 | O   | GLY | 115 | 110.816 | 2.508  | 28.613 | 1.00 77.20 | 1SG | 929 |
| ATOM | 929 | N   | ILE | 116 | 110.430 | 0.674  | 29.872 | 1.00 89.92 | 1SG | 930 |
| ATOM | 930 | CA  | ILE | 116 | 111.619 | 0.874  | 30.640 | 1.00 89.92 | 1SG | 931 |
| ATOM | 931 | CB  | ILE | 116 | 111.396 | 0.856  | 32.127 | 1.00 89.92 | 1SG | 932 |
| ATOM | 932 | CG2 | ILE | 116 | 110.918 | -0.548 | 32.531 | 1.00 89.92 | 1SG | 933 |
| ATOM | 933 | CG1 | ILE | 116 | 112.665 | 1.320  | 32.863 | 1.00 89.92 | 1SG | 934 |
| ATOM | 934 | CD1 | ILE | 116 | 112.441 | 1.602  | 34.348 | 1.00 89.92 | 1SG | 935 |
| ATOM | 935 | C   | ILE | 116 | 112.552 | -0.242 | 30.316 | 1.00 89.92 | 1SG | 936 |
| ATOM | 936 | O   | ILE | 116 | 112.156 | -1.404 | 30.238 | 1.00 89.92 | 1SG | 937 |
| ATOM | 937 | N   | GLY | 117 | 113.830 | 0.105  | 30.084 | 1.00119.68 | 1SG | 938 |
| ATOM | 938 | CA  | GLY | 117 | 114.823 | -0.878 | 29.783 | 1.00119.68 | 1SG | 939 |
| ATOM | 939 | C   | GLY | 117 | 116.103 | -0.338 | 30.320 | 1.00119.68 | 1SG | 940 |
| ATOM | 940 | O   | GLY | 117 | 116.213 | 0.856  | 30.595 | 1.00119.68 | 1SG | 941 |
| ATOM | 941 | N   | GLU | 118 | 117.115 | -1.209 | 30.482 | 1.00213.44 | 1SG | 942 |
| ATOM | 942 | CA  | GLU | 118 | 118.355 | -0.742 | 31.021 | 1.00213.44 | 1SG | 943 |
| ATOM | 943 | CB  | GLU | 118 | 119.338 | -1.867 | 31.384 | 1.00213.44 | 1SG | 944 |
| ATOM | 944 | CG  | GLU | 118 | 118.956 | -2.655 | 32.639 | 1.00213.44 | 1SG | 945 |
| ATOM | 945 | CD  | GLU | 118 | 120.022 | -3.724 | 32.837 | 1.00213.44 | 1SG | 946 |
| ATOM | 946 | OE1 | GLU | 118 | 120.783 | -3.973 | 31.864 | 1.00213.44 | 1SG | 947 |
| ATOM | 947 | OE2 | GLU | 118 | 120.089 | -4.306 | 33.952 | 1.00213.44 | 1SG | 948 |
| ATOM | 948 | C   | GLU | 118 | 119.019 | 0.119  | 30.000 | 1.00213.44 | 1SG | 949 |
| ATOM | 949 | O   | GLU | 118 | 118.964 | -0.152 | 28.802 | 1.00213.44 | 1SG | 950 |
| ATOM | 950 | N   | GLY | 119 | 119.657 | 1.206  | 30.474 | 1.00141.15 | 1SG | 951 |
| ATOM | 951 | CA  | GLY | 119 | 120.388 | 2.085  | 29.613 | 1.00141.15 | 1SG | 952 |
| ATOM | 952 | C   | GLY | 119 | 121.462 | 2.674  | 30.464 | 1.00141.15 | 1SG | 953 |
| ATOM | 953 | O   | GLY | 119 | 121.167 | 3.328  | 31.463 | 1.00141.15 | 1SG | 954 |
| ATOM | 954 | N   | SER | 120 | 122.730 | 2.432  | 30.069 | 1.00283.87 | 1SG | 955 |
| ATOM | 955 | CA  | SER | 120 | 123.915 | 2.867  | 30.737 | 1.00283.87 | 1SG | 956 |
| ATOM | 956 | CB  | SER | 120 | 123.764 | 3.038  | 32.259 | 1.00283.87 | 1SG | 957 |
| ATOM | 957 | OG  | SER | 120 | 123.345 | 1.814  | 32.842 | 1.00283.87 | 1SG | 958 |
| ATOM | 958 | C   | SER | 120 | 124.951 | 1.836  | 30.513 | 1.00283.87 | 1SG | 959 |
| ATOM | 959 | O   | SER | 120 | 124.650 | 0.694  | 30.172 | 1.00283.87 | 1SG | 960 |
| ATOM | 960 | N   | ARG | 121 | 126.221 | 2.236  | 30.677 | 1.00150.12 | 1SG | 961 |
| ATOM | 961 | CA  | ARG | 121 | 127.244 | 1.248  | 30.647 | 1.00150.12 | 1SG | 962 |
| ATOM | 962 | CB  | ARG | 121 | 128.650 | 1.844  | 30.836 | 1.00150.12 | 1SG | 963 |
| ATOM | 963 | CG  | ARG | 121 | 129.796 | 0.908  | 30.443 | 1.00150.12 | 1SG | 964 |
| ATOM | 964 | CD  | ARG | 121 | 130.014 | -0.267 | 31.397 | 1.00150.12 | 1SG | 965 |
| ATOM | 965 | NE  | ARG | 121 | 129.335 | -1.455 | 30.806 | 1.00150.12 | 1SG | 966 |
| ATOM | 966 | CZ  | ARG | 121 | 129.131 | -2.568 | 31.568 | 1.00150.12 | 1SG | 967 |
| ATOM | 967 | NH1 | ARG | 121 | 129.567 | -2.595 | 32.861 | 1.00150.12 | 1SG | 968 |
| ATOM | 968 | NH2 | ARG | 121 | 128.494 | -3.654 | 31.039 | 1.00150.12 | 1SG | 969 |
| ATOM | 969 | C   | ARG | 121 | 126.890 | 0.458  | 31.859 | 1.00150.12 | 1SG | 970 |
| ATOM | 970 | O   | ARG | 121 | 127.017 | -0.763 | 31.910 | 1.00150.12 | 1SG | 971 |
| ATOM | 971 | N   | ASP | 122 | 126.382 | 1.195  | 32.866 | 1.00 90.75 | 1SG | 972 |
| ATOM | 972 | CA  | ASP | 122 | 125.943 | 0.638  | 34.106 | 1.00 90.75 | 1SG | 973 |
| ATOM | 973 | CB  | ASP | 122 | 124.735 | -0.307 | 33.983 | 1.00 90.75 | 1SG | 974 |
| ATOM | 974 | CG  | ASP | 122 | 124.206 | -0.559 | 35.388 | 1.00 90.75 | 1SG | 975 |
| ATOM | 975 | OD1 | ASP | 122 | 124.811 | -0.014 | 36.350 | 1.00 90.75 | 1SG | 976 |
| ATOM | 976 | OD2 | ASP | 122 | 123.190 | -1.292 | 35.522 | 1.00 90.75 | 1SG | 977 |
| ATOM | 977 | C   | ASP | 122 | 127.066 | -0.142 | 34.682 | 1.00 90.75 | 1SG | 978 |
| ATOM | 978 | O   | ASP | 122 | 126.866 | -1.237 | 35.204 | 1.00 90.75 | 1SG | 979 |
| ATOM | 979 | N   | SER | 123 | 128.291 | 0.403  | 34.597 | 1.00 90.25 | 1SG | 980 |
| ATOM | 980 | CA  | SER | 123 | 129.377 | -0.304 | 35.195 | 1.00 90.25 | 1SG | 981 |
| ATOM | 981 | CB  | SER | 123 | 130.746 | 0.353  | 34.941 | 1.00 90.25 | 1SG | 982 |
| ATOM | 982 | OG  | SER | 123 | 131.778 | -0.395 | 35.566 | 1.00 90.25 | 1SG | 983 |
| ATOM | 983 | C   | SER | 123 | 129.110 | -0.246 | 36.657 | 1.00 90.25 | 1SG | 984 |
| ATOM | 984 | O   | SER | 123 | 128.679 | 0.786  | 37.174 | 1.00 90.25 | 1SG | 985 |
| ATOM | 985 | N   | LEU | 124 | 129.343 | -1.357 | 37.375 | 1.00 98.33 | 1SG | 986 |
| ATOM | 986 | CA  | LEU | 124 | 129.034 | -1.281 | 38.766 | 1.00 98.33 | 1SG | 987 |
| ATOM | 987 | CB  | LEU | 124 | 128.358 | -2.543 | 39.326 | 1.00 98.33 | 1SG | 988 |
| ATOM | 988 | CG  | LEU | 124 | 126.979 | -2.822 | 38.703 | 1.00 98.33 | 1SG | 989 |
| ATOM | 989 | CD2 | LEU | 124 | 127.097 | -3.111 | 37.198 | 1.00 98.33 | 1SG | 990 |
| ATOM | 990 | CD1 | LEU | 124 | 125.983 | -1.696 | 39.026 | 1.00 98.33 | 1SG | 991 |
| ATOM | 991 | C   | LEU | 124 | 130.300 | -1.095 | 39.521 | 1.00 98.33 | 1SG | 992 |
| ATOM | 992 | O   | LEU | 124 | 130.990 | -2.062 | 39.842 | 1.00 98.33 | 1SG | 993 |

## Supplementary material 1.txt

|      |      |     |     |     |         |        |        |            |         |
|------|------|-----|-----|-----|---------|--------|--------|------------|---------|
| ATOM | 993  | N   | LYS | 125 | 130.650 | 0.169  | 39.824 | 1.00112.90 | 1SG 994 |
| ATOM | 994  | CA  | LYS | 125 | 131.777 | 0.318  | 40.686 | 1.00112.90 | 1SG 995 |
| ATOM | 995  | CB  | LYS | 125 | 132.458 | 1.695  | 40.647 | 1.00112.90 | 1SG 996 |
| ATOM | 996  | CG  | LYS | 125 | 133.869 | 1.634  | 41.237 | 1.00112.90 | 1SG 997 |
| ATOM | 997  | CD  | LYS | 125 | 134.791 | 0.718  | 40.425 | 1.00112.90 | 1SG 998 |
| ATOM | 998  | CE  | LYS | 125 | 136.213 | 0.591  | 40.975 | 1.00112.90 | 1SG 999 |
| ATOM | 999  | NZ  | LYS | 125 | 136.979 | -0.381 | 40.163 | 1.00112.90 | 1SG1000 |
| ATOM | 1000 | C   | LYS | 125 | 131.151 | 0.115  | 42.025 | 1.00112.90 | 1SG1001 |
| ATOM | 1001 | O   | LYS | 125 | 130.246 | 0.848  | 42.418 | 1.00112.90 | 1SG1002 |
| ATOM | 1002 | N   | LYS | 126 | 131.633 | -0.909 | 42.744 | 1.00 62.63 | 1SG1003 |
| ATOM | 1003 | CA  | LYS | 126 | 131.042 | -1.436 | 43.940 | 1.00 62.63 | 1SG1004 |
| ATOM | 1004 | CB  | LYS | 126 | 131.723 | -2.751 | 44.359 | 1.00 62.63 | 1SG1005 |
| ATOM | 1005 | CG  | LYS | 126 | 131.458 | -3.874 | 43.351 | 1.00 62.63 | 1SG1006 |
| ATOM | 1006 | CD  | LYS | 126 | 132.387 | -5.083 | 43.475 | 1.00 62.63 | 1SG1007 |
| ATOM | 1007 | CE  | LYS | 126 | 132.082 | -6.180 | 42.450 | 1.00 62.63 | 1SG1008 |
| ATOM | 1008 | NZ  | LYS | 126 | 133.184 | -7.165 | 42.409 | 1.00 62.63 | 1SG1009 |
| ATOM | 1009 | C   | LYS | 126 | 131.011 | -0.505 | 45.120 | 1.00 62.63 | 1SG1010 |
| ATOM | 1010 | O   | LYS | 126 | 130.056 | -0.552 | 45.893 | 1.00 62.63 | 1SG1011 |
| ATOM | 1011 | N   | ASP | 127 | 132.027 | 0.356  | 45.318 | 1.00 52.56 | 1SG1012 |
| ATOM | 1012 | CA  | ASP | 127 | 132.086 | 1.120  | 46.541 | 1.00 52.56 | 1SG1013 |
| ATOM | 1013 | CB  | ASP | 127 | 133.459 | 1.771  | 46.803 | 1.00 52.56 | 1SG1014 |
| ATOM | 1014 | CG  | ASP | 127 | 133.765 | 2.745  | 45.676 | 1.00 52.56 | 1SG1015 |
| ATOM | 1015 | OD1 | ASP | 127 | 133.406 | 2.434  | 44.509 | 1.00 52.56 | 1SG1016 |
| ATOM | 1016 | OD2 | ASP | 127 | 134.359 | 3.817  | 45.967 | 1.00 52.56 | 1SG1017 |
| ATOM | 1017 | C   | ASP | 127 | 131.028 | 2.185  | 46.636 | 1.00 52.56 | 1SG1018 |
| ATOM | 1018 | O   | ASP | 127 | 130.515 | 2.689  | 45.640 | 1.00 52.56 | 1SG1019 |
| ATOM | 1019 | N   | LEU | 128 | 130.690 | 2.544  | 47.898 | 1.00 54.28 | 1SG1020 |
| ATOM | 1020 | CA  | LEU | 128 | 129.688 | 3.515  | 48.253 | 1.00 54.28 | 1SG1021 |
| ATOM | 1021 | CB  | LEU | 128 | 129.483 | 3.613  | 49.774 | 1.00 54.28 | 1SG1022 |
| ATOM | 1022 | CG  | LEU | 128 | 128.421 | 4.645  | 50.197 | 1.00 54.28 | 1SG1023 |
| ATOM | 1023 | CD2 | LEU | 128 | 128.439 | 4.854  | 51.719 | 1.00 54.28 | 1SG1024 |
| ATOM | 1024 | CD1 | LEU | 128 | 127.025 | 4.278  | 49.667 | 1.00 54.28 | 1SG1025 |
| ATOM | 1025 | C   | LEU | 128 | 130.084 | 4.879  | 47.767 | 1.00 54.28 | 1SG1026 |
| ATOM | 1026 | O   | LEU | 128 | 129.243 | 5.633  | 47.280 | 1.00 54.28 | 1SG1027 |
| ATOM | 1027 | N   | ASN | 129 | 131.381 | 5.228  | 47.883 | 1.00 70.76 | 1SG1028 |
| ATOM | 1028 | CA  | ASN | 129 | 131.856 | 6.537  | 47.516 | 1.00 70.76 | 1SG1029 |
| ATOM | 1029 | CB  | ASN | 129 | 133.392 | 6.622  | 47.437 | 1.00 70.76 | 1SG1030 |
| ATOM | 1030 | CG  | ASN | 129 | 134.059 | 6.099  | 48.690 | 1.00 70.76 | 1SG1031 |
| ATOM | 1031 | OD1 | ASN | 129 | 133.949 | 6.684  | 49.762 | 1.00 70.76 | 1SG1032 |
| ATOM | 1032 | ND2 | ASN | 129 | 134.798 | 4.965  | 48.548 | 1.00 70.76 | 1SG1033 |
| ATOM | 1033 | C   | ASN | 129 | 131.521 | 6.766  | 46.077 | 1.00 70.76 | 1SG1034 |
| ATOM | 1034 | O   | ASN | 129 | 130.892 | 7.756  | 45.708 | 1.00 70.76 | 1SG1035 |
| ATOM | 1035 | N   | ALA | 130 | 131.966 | 5.825  | 45.227 | 1.00 40.59 | 1SG1036 |
| ATOM | 1036 | CA  | ALA | 130 | 131.834 | 5.927  | 43.804 | 1.00 40.59 | 1SG1037 |
| ATOM | 1037 | CB  | ALA | 130 | 132.501 | 4.757  | 43.066 | 1.00 40.59 | 1SG1038 |
| ATOM | 1038 | C   | ALA | 130 | 130.395 | 5.906  | 43.417 | 1.00 40.59 | 1SG1039 |
| ATOM | 1039 | O   | ALA | 130 | 129.975 | 6.663  | 42.543 | 1.00 40.59 | 1SG1040 |
| ATOM | 1040 | N   | THR | 131 | 129.608 | 5.019  | 44.055 | 1.00106.52 | 1SG1041 |
| ATOM | 1041 | CA  | THR | 131 | 128.225 | 4.856  | 43.708 | 1.00106.52 | 1SG1042 |
| ATOM | 1042 | CB  | THR | 131 | 127.551 | 3.755  | 44.474 | 1.00106.52 | 1SG1043 |
| ATOM | 1043 | OG1 | THR | 131 | 127.616 | 4.016  | 45.868 | 1.00106.52 | 1SG1044 |
| ATOM | 1044 | CG2 | THR | 131 | 128.235 | 2.420  | 44.139 | 1.00106.52 | 1SG1045 |
| ATOM | 1045 | C   | THR | 131 | 127.461 | 6.112  | 43.986 | 1.00106.52 | 1SG1046 |
| ATOM | 1046 | O   | THR | 131 | 126.702 | 6.580  | 43.139 | 1.00106.52 | 1SG1047 |
| ATOM | 1047 | N   | ALA | 132 | 127.657 | 6.701  | 45.179 | 1.00 31.73 | 1SG1048 |
| ATOM | 1048 | CA  | ALA | 132 | 126.919 | 7.868  | 45.570 | 1.00 31.73 | 1SG1049 |
| ATOM | 1049 | CB  | ALA | 132 | 127.261 | 8.335  | 46.995 | 1.00 31.73 | 1SG1050 |
| ATOM | 1050 | C   | ALA | 132 | 127.238 | 8.994  | 44.635 | 1.00 31.73 | 1SG1051 |
| ATOM | 1051 | O   | ALA | 132 | 126.351 | 9.749  | 44.235 | 1.00 31.73 | 1SG1052 |
| ATOM | 1052 | N   | LEU | 133 | 128.525 | 9.137  | 44.272 | 1.00107.34 | 1SG1053 |
| ATOM | 1053 | CA  | LEU | 133 | 128.974 | 10.200 | 43.415 | 1.00107.34 | 1SG1054 |
| ATOM | 1054 | CB  | LEU | 133 | 130.504 | 10.178 | 43.222 | 1.00107.34 | 1SG1055 |
| ATOM | 1055 | CG  | LEU | 133 | 131.127 | 11.450 | 42.602 | 1.00107.34 | 1SG1056 |
| ATOM | 1056 | CD2 | LEU | 133 | 131.110 | 12.610 | 43.601 | 1.00107.34 | 1SG1057 |
| ATOM | 1057 | CD1 | LEU | 133 | 130.528 | 11.827 | 41.239 | 1.00107.34 | 1SG1058 |
| ATOM | 1058 | C   | LEU | 133 | 128.362 | 10.005 | 42.059 | 1.00107.34 | 1SG1059 |
| ATOM | 1059 | O   | LEU | 133 | 127.902 | 10.958 | 41.433 | 1.00107.34 | 1SG1060 |
| ATOM | 1060 | N   | GLY | 134 | 128.337 | 8.746  | 41.574 | 1.00 29.29 | 1SG1061 |
| ATOM | 1061 | CA  | GLY | 134 | 127.833 | 8.454  | 40.262 | 1.00 29.29 | 1SG1062 |
| ATOM | 1062 | C   | GLY | 134 | 126.384 | 8.828  | 40.199 | 1.00 29.29 | 1SG1063 |
| ATOM | 1063 | O   | GLY | 134 | 125.903 | 9.329  | 39.183 | 1.00 29.29 | 1SG1064 |

## Supplementary material 1.txt

|      |      |     |     |     |         |        |        |      |        |         |
|------|------|-----|-----|-----|---------|--------|--------|------|--------|---------|
| ATOM | 1064 | N   | PHE | 135 | 125.649 | 8.548  | 41.289 | 1.00 | 63.38  | 1SG1065 |
| ATOM | 1065 | CA  | PHE | 135 | 124.245 | 8.821  | 41.393 | 1.00 | 63.38  | 1SG1066 |
| ATOM | 1066 | CB  | PHE | 135 | 123.702 | 8.319  | 42.747 | 1.00 | 63.38  | 1SG1067 |
| ATOM | 1067 | CG  | PHE | 135 | 122.259 | 8.657  | 42.901 | 1.00 | 63.38  | 1SG1068 |
| ATOM | 1068 | CD1 | PHE | 135 | 121.280 | 7.862  | 42.352 | 1.00 | 63.38  | 1SG1069 |
| ATOM | 1069 | CD2 | PHE | 135 | 121.886 | 9.770  | 43.621 | 1.00 | 63.38  | 1SG1070 |
| ATOM | 1070 | CE1 | PHE | 135 | 119.951 | 8.182  | 42.511 | 1.00 | 63.38  | 1SG1071 |
| ATOM | 1071 | CE2 | PHE | 135 | 120.560 | 10.095 | 43.783 | 1.00 | 63.38  | 1SG1072 |
| ATOM | 1072 | CZ  | PHE | 135 | 119.590 | 9.300  | 43.225 | 1.00 | 63.38  | 1SG1073 |
| ATOM | 1073 | C   | PHE | 135 | 123.989 | 10.299 | 41.310 | 1.00 | 63.38  | 1SG1074 |
| ATOM | 1074 | O   | PHE | 135 | 123.213 | 10.759 | 40.474 | 1.00 | 63.38  | 1SG1075 |
| ATOM | 1075 | N   | ARG | 136 | 124.683 | 11.087 | 42.153 | 1.00 | 134.11 | 1SG1076 |
| ATOM | 1076 | CA  | ARG | 136 | 124.456 | 12.501 | 42.264 | 1.00 | 134.11 | 1SG1077 |
| ATOM | 1077 | CB  | ARG | 136 | 125.375 | 13.134 | 43.320 | 1.00 | 134.11 | 1SG1078 |
| ATOM | 1078 | CG  | ARG | 136 | 125.209 | 14.644 | 43.481 | 1.00 | 134.11 | 1SG1079 |
| ATOM | 1079 | CD  | ARG | 136 | 126.388 | 15.279 | 44.219 | 1.00 | 134.11 | 1SG1080 |
| ATOM | 1080 | NE  | ARG | 136 | 127.621 | 14.761 | 43.560 | 1.00 | 134.11 | 1SG1081 |
| ATOM | 1081 | CZ  | ARG | 136 | 128.728 | 15.546 | 43.429 | 1.00 | 134.11 | 1SG1082 |
| ATOM | 1082 | NH1 | ARG | 136 | 128.736 | 16.814 | 43.932 | 1.00 | 134.11 | 1SG1083 |
| ATOM | 1083 | NH2 | ARG | 136 | 129.834 | 15.061 | 42.793 | 1.00 | 134.11 | 1SG1084 |
| ATOM | 1084 | C   | ARG | 136 | 124.732 | 13.200 | 40.969 | 1.00 | 134.11 | 1SG1085 |
| ATOM | 1085 | O   | ARG | 136 | 123.913 | 13.985 | 40.491 | 1.00 | 134.11 | 1SG1086 |
| ATOM | 1086 | N   | ALA | 137 | 125.887 | 12.910 | 40.349 | 1.00 | 41.62  | 1SG1087 |
| ATOM | 1087 | CA  | ALA | 137 | 126.283 | 13.620 | 39.168 | 1.00 | 41.62  | 1SG1088 |
| ATOM | 1088 | CB  | ALA | 137 | 127.662 | 13.182 | 38.646 | 1.00 | 41.62  | 1SG1089 |
| ATOM | 1089 | C   | ALA | 137 | 125.294 | 13.380 | 38.071 | 1.00 | 41.62  | 1SG1090 |
| ATOM | 1090 | O   | ALA | 137 | 124.886 | 14.317 | 37.390 | 1.00 | 41.62  | 1SG1091 |
| ATOM | 1091 | N   | LEU | 138 | 124.869 | 12.118 | 37.881 | 1.00 | 52.86  | 1SG1092 |
| ATOM | 1092 | CA  | LEU | 138 | 123.981 | 11.772 | 36.807 | 1.00 | 52.86  | 1SG1093 |
| ATOM | 1093 | CB  | LEU | 138 | 123.732 | 10.254 | 36.724 | 1.00 | 52.86  | 1SG1094 |
| ATOM | 1094 | CG  | LEU | 138 | 124.996 | 9.450  | 36.359 | 1.00 | 52.86  | 1SG1095 |
| ATOM | 1095 | CD2 | LEU | 138 | 125.639 | 9.986  | 35.070 | 1.00 | 52.86  | 1SG1096 |
| ATOM | 1096 | CD1 | LEU | 138 | 124.711 | 7.941  | 36.282 | 1.00 | 52.86  | 1SG1097 |
| ATOM | 1097 | C   | LEU | 138 | 122.648 | 12.439 | 36.990 | 1.00 | 52.86  | 1SG1098 |
| ATOM | 1098 | O   | LEU | 138 | 122.085 | 12.978 | 36.040 | 1.00 | 52.86  | 1SG1099 |
| ATOM | 1099 | N   | ARG | 139 | 122.110 | 12.424 | 38.226 | 1.00 | 129.73 | 1SG1100 |
| ATOM | 1100 | CA  | ARG | 139 | 120.809 | 12.976 | 38.482 | 1.00 | 129.73 | 1SG1101 |
| ATOM | 1101 | CB  | ARG | 139 | 120.321 | 12.745 | 39.923 | 1.00 | 129.73 | 1SG1102 |
| ATOM | 1102 | CG  | ARG | 139 | 119.858 | 11.311 | 40.196 | 1.00 | 129.73 | 1SG1103 |
| ATOM | 1103 | CD  | ARG | 139 | 118.526 | 10.970 | 39.520 | 1.00 | 129.73 | 1SG1104 |
| ATOM | 1104 | NE  | ARG | 139 | 118.124 | 9.599  | 39.950 | 1.00 | 129.73 | 1SG1105 |
| ATOM | 1105 | CZ  | ARG | 139 | 117.355 | 9.433  | 41.066 | 1.00 | 129.73 | 1SG1106 |
| ATOM | 1106 | NH1 | ARG | 139 | 116.956 | 10.521 | 41.788 | 1.00 | 129.73 | 1SG1107 |
| ATOM | 1107 | NH2 | ARG | 139 | 116.978 | 8.181  | 41.457 | 1.00 | 129.73 | 1SG1108 |
| ATOM | 1108 | C   | ARG | 139 | 120.794 | 14.451 | 38.225 | 1.00 | 129.73 | 1SG1109 |
| ATOM | 1109 | O   | ARG | 139 | 119.866 | 14.970 | 37.607 | 1.00 | 129.73 | 1SG1110 |
| ATOM | 1110 | N   | LEU | 140 | 121.847 | 15.163 | 38.656 | 1.00 | 70.45  | 1SG1111 |
| ATOM | 1111 | CA  | LEU | 140 | 121.898 | 16.593 | 38.529 | 1.00 | 70.45  | 1SG1112 |
| ATOM | 1112 | CB  | LEU | 140 | 123.185 | 17.190 | 39.116 | 1.00 | 70.45  | 1SG1113 |
| ATOM | 1113 | CG  | LEU | 140 | 123.299 | 16.973 | 40.634 | 1.00 | 70.45  | 1SG1114 |
| ATOM | 1114 | CD2 | LEU | 140 | 121.999 | 17.374 | 41.346 | 1.00 | 70.45  | 1SG1115 |
| ATOM | 1115 | CD1 | LEU | 140 | 124.543 | 17.667 | 41.208 | 1.00 | 70.45  | 1SG1116 |
| ATOM | 1116 | C   | LEU | 140 | 121.841 | 16.940 | 37.073 | 1.00 | 70.45  | 1SG1117 |
| ATOM | 1117 | O   | LEU | 140 | 121.386 | 18.017 | 36.690 | 1.00 | 70.45  | 1SG1118 |
| ATOM | 1118 | N   | HIS | 141 | 122.391 | 16.046 | 36.241 | 1.00 | 118.97 | 1SG1119 |
| ATOM | 1119 | CA  | HIS | 141 | 122.469 | 16.138 | 34.812 | 1.00 | 118.97 | 1SG1120 |
| ATOM | 1120 | ND1 | HIS | 141 | 125.480 | 17.050 | 33.567 | 1.00 | 118.97 | 1SG1121 |
| ATOM | 1121 | CG  | HIS | 141 | 124.929 | 16.182 | 34.482 | 1.00 | 118.97 | 1SG1122 |
| ATOM | 1122 | CB  | HIS | 141 | 123.675 | 15.391 | 34.231 | 1.00 | 118.97 | 1SG1123 |
| ATOM | 1123 | NE2 | HIS | 141 | 126.766 | 17.138 | 35.379 | 1.00 | 118.97 | 1SG1124 |
| ATOM | 1124 | CD2 | HIS | 141 | 125.725 | 16.249 | 35.583 | 1.00 | 118.97 | 1SG1125 |
| ATOM | 1125 | CE1 | HIS | 141 | 126.577 | 17.594 | 34.156 | 1.00 | 118.97 | 1SG1126 |
| ATOM | 1126 | C   | HIS | 141 | 121.200 | 15.775 | 34.093 | 1.00 | 118.97 | 1SG1127 |
| ATOM | 1127 | O   | HIS | 141 | 121.143 | 15.952 | 32.877 | 1.00 | 118.97 | 1SG1128 |
| ATOM | 1128 | N   | ARG | 142 | 120.178 | 15.242 | 34.802 | 1.00 | 171.14 | 1SG1129 |
| ATOM | 1129 | CA  | ARG | 142 | 118.909 | 14.830 | 34.252 | 1.00 | 171.14 | 1SG1130 |
| ATOM | 1130 | CB  | ARG | 142 | 118.445 | 15.696 | 33.064 | 1.00 | 171.14 | 1SG1131 |
| ATOM | 1131 | CG  | ARG | 142 | 118.694 | 17.193 | 33.279 | 1.00 | 171.14 | 1SG1132 |
| ATOM | 1132 | CD  | ARG | 142 | 117.971 | 18.084 | 32.265 | 1.00 | 171.14 | 1SG1133 |
| ATOM | 1133 | NE  | ARG | 142 | 118.503 | 17.756 | 30.913 | 1.00 | 171.14 | 1SG1134 |
| ATOM | 1134 | CZ  | ARG | 142 | 117.791 | 18.096 | 29.800 | 1.00 | 171.14 | 1SG1135 |



## Supplementary material 1.txt

|      |      |     |     |     |         |        |        |            |         |
|------|------|-----|-----|-----|---------|--------|--------|------------|---------|
| ATOM | 1135 | NH1 | ARG | 142 | 116.594 | 18.741 | 29.924 | 1.00171.14 | 1SG1136 |
| ATOM | 1136 | NH2 | ARG | 142 | 118.276 | 17.788 | 28.562 | 1.00171.14 | 1SG1137 |
| ATOM | 1137 | C   | ARG | 142 | 118.931 | 13.407 | 33.766 | 1.00171.14 | 1SG1138 |
| ATOM | 1138 | O   | ARG | 142 | 118.024 | 12.987 | 33.048 | 1.00171.14 | 1SG1139 |
| ATOM | 1139 | N   | TYR | 143 | 119.915 | 12.597 | 34.203 | 1.0098.17  | 1SG1140 |
| ATOM | 1140 | CA  | TYR | 143 | 119.935 | 11.213 | 33.807 | 1.0098.17  | 1SG1141 |
| ATOM | 1141 | CB  | TYR | 143 | 121.356 | 10.633 | 33.686 | 1.0098.17  | 1SG1142 |
| ATOM | 1142 | CG  | TYR | 143 | 122.119 | 11.447 | 32.696 | 1.0098.17  | 1SG1143 |
| ATOM | 1143 | CD1 | TYR | 143 | 121.840 | 11.381 | 31.351 | 1.0098.17  | 1SG1144 |
| ATOM | 1144 | CD2 | TYR | 143 | 123.141 | 12.264 | 33.121 | 1.0098.17  | 1SG1145 |
| ATOM | 1145 | CE1 | TYR | 143 | 122.558 | 12.135 | 30.453 | 1.0098.17  | 1SG1146 |
| ATOM | 1146 | CE2 | TYR | 143 | 123.862 | 13.019 | 32.226 | 1.0098.17  | 1SG1147 |
| ATOM | 1147 | CZ  | TYR | 143 | 123.570 | 12.957 | 30.887 | 1.0098.17  | 1SG1148 |
| ATOM | 1148 | OH  | TYR | 143 | 124.306 | 13.729 | 29.963 | 1.0098.17  | 1SG1149 |
| ATOM | 1149 | C   | TYR | 143 | 119.270 | 10.468 | 34.927 | 1.0098.17  | 1SG1150 |
| ATOM | 1150 | O   | TYR | 143 | 119.754 | 10.469 | 36.057 | 1.0098.17  | 1SG1151 |
| ATOM | 1151 | N   | ASN | 144 | 118.126 | 9.808  | 34.645 | 1.0068.62  | 1SG1152 |
| ATOM | 1152 | CA  | ASN | 144 | 117.400 | 9.155  | 35.703 | 1.0068.62  | 1SG1153 |
| ATOM | 1153 | CB  | ASN | 144 | 115.911 | 8.948  | 35.364 | 1.0068.62  | 1SG1154 |
| ATOM | 1154 | CG  | ASN | 144 | 115.158 | 8.516  | 36.620 | 1.0068.62  | 1SG1155 |
| ATOM | 1155 | OD1 | ASN | 144 | 115.734 | 8.332  | 37.691 | 1.0068.62  | 1SG1156 |
| ATOM | 1156 | ND2 | ASN | 144 | 113.817 | 8.339  | 36.484 | 1.0068.62  | 1SG1157 |
| ATOM | 1157 | C   | ASN | 144 | 117.996 | 7.806  | 35.955 | 1.0068.62  | 1SG1158 |
| ATOM | 1158 | O   | ASN | 144 | 117.552 | 6.803  | 35.397 | 1.0068.62  | 1SG1159 |
| ATOM | 1159 | N   | VAL | 145 | 119.013 | 7.752  | 36.836 | 1.0050.66  | 1SG1160 |
| ATOM | 1160 | CA  | VAL | 145 | 119.639 | 6.502  | 37.170 | 1.0050.66  | 1SG1161 |
| ATOM | 1161 | CB  | VAL | 145 | 121.067 | 6.650  | 37.594 | 1.0050.66  | 1SG1162 |
| ATOM | 1162 | CG1 | VAL | 145 | 121.590 | 5.281  | 38.060 | 1.0050.66  | 1SG1163 |
| ATOM | 1163 | CG2 | VAL | 145 | 121.849 | 7.254  | 36.419 | 1.0050.66  | 1SG1164 |
| ATOM | 1164 | C   | VAL | 145 | 118.890 | 5.898  | 38.315 | 1.0050.66  | 1SG1165 |
| ATOM | 1165 | O   | VAL | 145 | 118.497 | 6.594  | 39.249 | 1.0050.66  | 1SG1166 |
| ATOM | 1166 | N   | SER | 146 | 118.693 | 4.565  | 38.277 | 1.0038.45  | 1SG1167 |
| ATOM | 1167 | CA  | SER | 146 | 117.933 | 3.892  | 39.294 | 1.0038.45  | 1SG1168 |
| ATOM | 1168 | CB  | SER | 146 | 117.664 | 2.412  | 38.976 | 1.0038.45  | 1SG1169 |
| ATOM | 1169 | OG  | SER | 146 | 116.911 | 1.820  | 40.024 | 1.0038.45  | 1SG1170 |
| ATOM | 1170 | C   | SER | 146 | 118.668 | 3.958  | 40.597 | 1.0038.45  | 1SG1171 |
| ATOM | 1171 | O   | SER | 146 | 119.889 | 3.823  | 40.645 | 1.0038.45  | 1SG1172 |
| ATOM | 1172 | N   | SER | 147 | 117.907 | 4.186  | 41.690 | 1.0092.80  | 1SG1173 |
| ATOM | 1173 | CA  | SER | 147 | 118.417 | 4.303  | 43.030 | 1.0092.80  | 1SG1174 |
| ATOM | 1174 | CB  | SER | 147 | 117.450 | 5.016  | 43.989 | 1.0092.80  | 1SG1175 |
| ATOM | 1175 | OG  | SER | 147 | 118.066 | 5.164  | 45.259 | 1.0092.80  | 1SG1176 |
| ATOM | 1176 | C   | SER | 147 | 118.712 | 2.946  | 43.598 | 1.0092.80  | 1SG1177 |
| ATOM | 1177 | O   | SER | 147 | 119.176 | 2.825  | 44.729 | 1.0092.80  | 1SG1178 |
| ATOM | 1178 | N   | GLY | 148 | 118.441 | 1.887  | 42.819 | 1.0046.40  | 1SG1179 |
| ATOM | 1179 | CA  | GLY | 148 | 118.605 | 0.512  | 43.210 | 1.0046.40  | 1SG1180 |
| ATOM | 1180 | C   | GLY | 148 | 120.042 | 0.247  | 43.530 | 1.0046.40  | 1SG1181 |
| ATOM | 1181 | O   | GLY | 148 | 120.361 | -0.700 | 44.246 | 1.0046.40  | 1SG1182 |
| ATOM | 1182 | N   | VAL | 149 | 120.950 | 1.063  | 42.970 | 1.00116.11 | 1SG1183 |
| ATOM | 1183 | CA  | VAL | 149 | 122.366 | 0.884  | 43.121 | 1.00116.11 | 1SG1184 |
| ATOM | 1184 | CB  | VAL | 149 | 123.165 | 1.985  | 42.486 | 1.00116.11 | 1SG1185 |
| ATOM | 1185 | CG1 | VAL | 149 | 122.910 | 1.965  | 40.970 | 1.00116.11 | 1SG1186 |
| ATOM | 1186 | CG2 | VAL | 149 | 122.794 | 3.314  | 43.163 | 1.00116.11 | 1SG1187 |
| ATOM | 1187 | C   | VAL | 149 | 122.703 | 0.870  | 44.583 | 1.00116.11 | 1SG1188 |
| ATOM | 1188 | O   | VAL | 149 | 123.715 | 0.300  | 44.978 | 1.00116.11 | 1SG1189 |
| ATOM | 1189 | N   | LEU | 150 | 121.887 | 1.554  | 45.402 | 1.00127.18 | 1SG1190 |
| ATOM | 1190 | CA  | LEU | 150 | 121.998 | 1.691  | 46.831 | 1.00127.18 | 1SG1191 |
| ATOM | 1191 | CB  | LEU | 150 | 121.064 | 2.769  | 47.414 | 1.00127.18 | 1SG1192 |
| ATOM | 1192 | CG  | LEU | 150 | 121.419 | 4.205  | 46.985 | 1.00127.18 | 1SG1193 |
| ATOM | 1193 | CD2 | LEU | 150 | 120.601 | 5.242  | 47.771 | 1.00127.18 | 1SG1194 |
| ATOM | 1194 | CD1 | LEU | 150 | 121.298 | 4.384  | 45.466 | 1.00127.18 | 1SG1195 |
| ATOM | 1195 | C   | LEU | 150 | 121.702 | 0.406  | 47.555 | 1.00127.18 | 1SG1196 |
| ATOM | 1196 | O   | LEU | 150 | 121.971 | 0.305  | 48.751 | 1.00127.18 | 1SG1197 |
| ATOM | 1197 | N   | GLU | 151 | 121.053 | -0.571 | 46.891 | 1.0049.37  | 1SG1198 |
| ATOM | 1198 | CA  | GLU | 151 | 120.626 | -1.797 | 47.520 | 1.0049.37  | 1SG1199 |
| ATOM | 1199 | CB  | GLU | 151 | 119.906 | -2.749 | 46.546 | 1.0049.37  | 1SG1200 |
| ATOM | 1200 | CG  | GLU | 151 | 118.544 | -2.249 | 46.060 | 1.0049.37  | 1SG1201 |
| ATOM | 1201 | CD  | GLU | 151 | 117.983 | -3.306 | 45.115 | 1.0049.37  | 1SG1202 |
| ATOM | 1202 | OE1 | GLU | 151 | 118.420 | -4.482 | 45.226 | 1.0049.37  | 1SG1203 |
| ATOM | 1203 | OE2 | GLU | 151 | 117.115 | -2.954 | 44.272 | 1.0049.37  | 1SG1204 |
| ATOM | 1204 | C   | GLU | 151 | 121.775 | -2.580 | 48.098 | 1.0049.37  | 1SG1205 |
| ATOM | 1205 | O   | GLU | 151 | 121.669 | -3.098 | 49.209 | 1.0049.37  | 1SG1206 |

## Supplementary material 1.txt

|      |      |     |     |     |         |         |        |            |         |
|------|------|-----|-----|-----|---------|---------|--------|------------|---------|
| ATOM | 1206 | N   | ASN | 152 | 122.915 | -2.673  | 47.392 | 1.00106.23 | 1SG1207 |
| ATOM | 1207 | CA  | ASN | 152 | 123.997 | -3.509  | 47.841 | 1.00106.23 | 1SG1208 |
| ATOM | 1208 | CB  | ASN | 152 | 125.208 | -3.528  | 46.890 | 1.00106.23 | 1SG1209 |
| ATOM | 1209 | CG  | ASN | 152 | 125.820 | -2.141  | 46.844 | 1.00106.23 | 1SG1210 |
| ATOM | 1210 | OD1 | ASN | 152 | 125.210 | -1.196  | 46.354 | 1.00106.23 | 1SG1211 |
| ATOM | 1211 | ND2 | ASN | 152 | 127.067 | -2.010  | 47.371 | 1.00106.23 | 1SG1212 |
| ATOM | 1212 | C   | ASN | 152 | 124.475 | -3.045  | 49.181 | 1.00106.23 | 1SG1213 |
| ATOM | 1213 | O   | ASN | 152 | 125.032 | -3.823  | 49.953 | 1.00106.23 | 1SG1214 |
| ATOM | 1214 | N   | PHE | 153 | 124.339 | -1.739  | 49.451 | 1.00 91.71 | 1SG1215 |
| ATOM | 1215 | CA  | PHE | 153 | 124.748 | -1.106  | 50.669 | 1.00 91.71 | 1SG1216 |
| ATOM | 1216 | CB  | PHE | 153 | 124.823 | 0.418   | 50.519 | 1.00 91.71 | 1SG1217 |
| ATOM | 1217 | CG  | PHE | 153 | 125.774 | 0.638   | 49.394 | 1.00 91.71 | 1SG1218 |
| ATOM | 1218 | CD1 | PHE | 153 | 127.112 | 0.360   | 49.547 | 1.00 91.71 | 1SG1219 |
| ATOM | 1219 | CD2 | PHE | 153 | 125.328 | 1.129   | 48.188 | 1.00 91.71 | 1SG1220 |
| ATOM | 1220 | CE1 | PHE | 153 | 127.991 | 0.559   | 48.510 | 1.00 91.71 | 1SG1221 |
| ATOM | 1221 | CE2 | PHE | 153 | 126.203 | 1.332   | 47.147 | 1.00 91.71 | 1SG1222 |
| ATOM | 1222 | CZ  | PHE | 153 | 127.538 | 1.045   | 47.306 | 1.00 91.71 | 1SG1223 |
| ATOM | 1223 | C   | PHE | 153 | 123.826 | -1.440  | 51.811 | 1.00 91.71 | 1SG1224 |
| ATOM | 1224 | O   | PHE | 153 | 124.250 | -1.435  | 52.965 | 1.00 91.71 | 1SG1225 |
| ATOM | 1225 | N   | ARG | 154 | 122.529 | -1.686  | 51.532 | 1.00137.06 | 1SG1226 |
| ATOM | 1226 | CA  | ARG | 154 | 121.538 | -1.880  | 52.555 | 1.00137.06 | 1SG1227 |
| ATOM | 1227 | CB  | ARG | 154 | 120.183 | -1.237  | 52.196 | 1.00137.06 | 1SG1228 |
| ATOM | 1228 | CG  | ARG | 154 | 119.592 | -1.726  | 50.868 | 1.00137.06 | 1SG1229 |
| ATOM | 1229 | CD  | ARG | 154 | 119.115 | -3.180  | 50.885 | 1.00137.06 | 1SG1230 |
| ATOM | 1230 | NE  | ARG | 154 | 118.589 | -3.507  | 49.529 | 1.00137.06 | 1SG1231 |
| ATOM | 1231 | CZ  | ARG | 154 | 117.314 | -3.966  | 49.378 | 1.00137.06 | 1SG1232 |
| ATOM | 1232 | NH1 | ARG | 154 | 116.496 | -4.100  | 50.464 | 1.00137.06 | 1SG1233 |
| ATOM | 1233 | NH2 | ARG | 154 | 116.855 | -4.299  | 48.135 | 1.00137.06 | 1SG1234 |
| ATOM | 1234 | C   | ARG | 154 | 121.295 | -3.327  | 52.861 | 1.00137.06 | 1SG1235 |
| ATOM | 1235 | O   | ARG | 154 | 121.656 | -4.230  | 52.108 | 1.00137.06 | 1SG1236 |
| ATOM | 1236 | N   | ASP | 155 | 120.671 | -3.541  | 54.037 | 1.00125.63 | 1SG1237 |
| ATOM | 1237 | CA  | ASP | 155 | 120.315 | -4.807  | 54.607 | 1.00125.63 | 1SG1238 |
| ATOM | 1238 | CB  | ASP | 155 | 120.116 | -4.664  | 56.128 | 1.00125.63 | 1SG1239 |
| ATOM | 1239 | CG  | ASP | 155 | 119.960 | -6.024  | 56.779 | 1.00125.63 | 1SG1240 |
| ATOM | 1240 | OD1 | ASP | 155 | 120.366 | -7.027  | 56.137 | 1.00125.63 | 1SG1241 |
| ATOM | 1241 | OD2 | ASP | 155 | 119.421 | -6.079  | 57.916 | 1.00125.63 | 1SG1242 |
| ATOM | 1242 | C   | ASP | 155 | 119.005 | -5.230  | 54.000 | 1.00125.63 | 1SG1243 |
| ATOM | 1243 | O   | ASP | 155 | 118.431 | -4.526  | 53.173 | 1.00125.63 | 1SG1244 |
| ATOM | 1244 | N   | ASP | 156 | 118.507 | -6.418  | 54.401 | 1.00 39.02 | 1SG1245 |
| ATOM | 1245 | CA  | ASP | 156 | 117.257 | -6.955  | 53.949 | 1.00 39.02 | 1SG1246 |
| ATOM | 1246 | CB  | ASP | 156 | 116.927 | -8.328  | 54.558 | 1.00 39.02 | 1SG1247 |
| ATOM | 1247 | CG  | ASP | 156 | 117.920 | -9.348  | 54.022 | 1.00 39.02 | 1SG1248 |
| ATOM | 1248 | OD1 | ASP | 156 | 119.001 | -8.924  | 53.534 | 1.00 39.02 | 1SG1249 |
| ATOM | 1249 | OD2 | ASP | 156 | 117.611 | -10.567 | 54.101 | 1.00 39.02 | 1SG1250 |
| ATOM | 1250 | C   | ASP | 156 | 116.208 | -6.013  | 54.429 | 1.00 39.02 | 1SG1251 |
| ATOM | 1251 | O   | ASP | 156 | 115.167 | -5.836  | 53.797 | 1.00 39.02 | 1SG1252 |
| ATOM | 1252 | N   | ASN | 157 | 116.479 | -5.374  | 55.579 | 1.00 46.31 | 1SG1253 |
| ATOM | 1253 | CA  | ASN | 157 | 115.555 | -4.455  | 56.168 | 1.00 46.31 | 1SG1254 |
| ATOM | 1254 | CB  | ASN | 157 | 116.114 | -3.776  | 57.433 | 1.00 46.31 | 1SG1255 |
| ATOM | 1255 | CG  | ASN | 157 | 115.027 | -2.900  | 58.047 | 1.00 46.31 | 1SG1256 |
| ATOM | 1256 | OD1 | ASN | 157 | 114.453 | -2.031  | 57.392 | 1.00 46.31 | 1SG1257 |
| ATOM | 1257 | ND2 | ASN | 157 | 114.725 | -3.140  | 59.351 | 1.00 46.31 | 1SG1258 |
| ATOM | 1258 | C   | ASN | 157 | 115.298 | -3.396  | 55.150 | 1.00 46.31 | 1SG1259 |
| ATOM | 1259 | O   | ASN | 157 | 114.177 | -2.907  | 55.025 | 1.00 46.31 | 1SG1260 |
| ATOM | 1260 | N   | GLY | 158 | 116.328 | -3.035  | 54.360 | 1.00 28.66 | 1SG1261 |
| ATOM | 1261 | CA  | GLY | 158 | 116.132 | -2.016  | 53.373 | 1.00 28.66 | 1SG1262 |
| ATOM | 1262 | C   | GLY | 158 | 116.790 | -0.768  | 53.854 | 1.00 28.66 | 1SG1263 |
| ATOM | 1263 | O   | GLY | 158 | 116.698 | 0.280   | 53.217 | 1.00 28.66 | 1SG1264 |
| ATOM | 1264 | N   | GLN | 159 | 117.468 | -0.842  | 55.012 | 1.00 99.74 | 1SG1265 |
| ATOM | 1265 | CA  | GLN | 159 | 118.147 | 0.325   | 55.481 | 1.00 99.74 | 1SG1266 |
| ATOM | 1266 | CB  | GLN | 159 | 117.715 | 0.764   | 56.888 | 1.00 99.74 | 1SG1267 |
| ATOM | 1267 | CG  | GLN | 159 | 116.234 | 1.138   | 56.942 | 1.00 99.74 | 1SG1268 |
| ATOM | 1268 | CD  | GLN | 159 | 115.938 | 2.060   | 55.769 | 1.00 99.74 | 1SG1269 |
| ATOM | 1269 | OE1 | GLN | 159 | 116.674 | 3.005   | 55.492 | 1.00 99.74 | 1SG1270 |
| ATOM | 1270 | NE2 | GLN | 159 | 114.825 | 1.765   | 55.046 | 1.00 99.74 | 1SG1271 |
| ATOM | 1271 | C   | GLN | 159 | 119.602 | 0.005   | 55.516 | 1.00 99.74 | 1SG1272 |
| ATOM | 1272 | O   | GLN | 159 | 119.990 | -1.148  | 55.334 | 1.00 99.74 | 1SG1273 |
| ATOM | 1273 | N   | PHE | 160 | 120.454 | 1.038   | 55.681 | 1.00127.50 | 1SG1274 |
| ATOM | 1274 | CA  | PHE | 160 | 121.845 | 0.754   | 55.858 | 1.00127.50 | 1SG1275 |
| ATOM | 1275 | CB  | PHE | 160 | 122.716 | 2.024   | 55.875 | 1.00127.50 | 1SG1276 |
| ATOM | 1276 | CG  | PHE | 160 | 122.520 | 2.724   | 54.574 | 1.00127.50 | 1SG1277 |

## Supplementary material 1.txt

|      |      |     |     |     |         |         |        |            |         |
|------|------|-----|-----|-----|---------|---------|--------|------------|---------|
| ATOM | 1277 | CD1 | PHE | 160 | 123.289 | 2.412   | 53.478 | 1.00127.50 | 1SG1278 |
| ATOM | 1278 | CD2 | PHE | 160 | 121.553 | 3.696   | 54.449 | 1.00127.50 | 1SG1279 |
| ATOM | 1279 | CE1 | PHE | 160 | 123.100 | 3.065   | 52.281 | 1.00127.50 | 1SG1280 |
| ATOM | 1280 | CE2 | PHE | 160 | 121.359 | 4.352   | 53.256 | 1.00127.50 | 1SG1281 |
| ATOM | 1281 | CZ  | PHE | 160 | 122.133 | 4.035   | 52.166 | 1.00127.50 | 1SG1282 |
| ATOM | 1282 | C   | PHE | 160 | 121.825 | 0.223   | 57.267 | 1.00127.50 | 1SG1283 |
| ATOM | 1283 | O   | PHE | 160 | 122.104 | 0.950   | 58.215 | 1.00127.50 | 1SG1284 |
| ATOM | 1284 | N   | PHE | 161 | 121.528 | -1.081  | 57.447 | 1.00221.88 | 1SG1285 |
| ATOM | 1285 | CA  | PHE | 161 | 121.221 | -1.588  | 58.761 | 1.00221.88 | 1SG1286 |
| ATOM | 1286 | CB  | PHE | 161 | 120.597 | -2.998  | 58.730 | 1.00221.88 | 1SG1287 |
| ATOM | 1287 | CG  | PHE | 161 | 119.880 | -3.245  | 60.015 | 1.00221.88 | 1SG1288 |
| ATOM | 1288 | CD1 | PHE | 161 | 118.588 | -2.793  | 60.160 | 1.00221.88 | 1SG1289 |
| ATOM | 1289 | CD2 | PHE | 161 | 120.471 | -3.908  | 61.066 | 1.00221.88 | 1SG1290 |
| ATOM | 1290 | CE1 | PHE | 161 | 117.887 | -2.999  | 61.324 | 1.00221.88 | 1SG1291 |
| ATOM | 1291 | CE2 | PHE | 161 | 119.772 | -4.120  | 62.233 | 1.00221.88 | 1SG1292 |
| ATOM | 1292 | CZ  | PHE | 161 | 118.481 | -3.668  | 62.365 | 1.00221.88 | 1SG1293 |
| ATOM | 1293 | C   | PHE | 161 | 122.430 | -1.591  | 59.645 | 1.00221.88 | 1SG1294 |
| ATOM | 1294 | O   | PHE | 161 | 123.549 | -1.849  | 59.211 | 1.00221.88 | 1SG1295 |
| ATOM | 1295 | N   | CYS | 162 | 122.210 | -1.286  | 60.939 | 1.0095.35  | 1SG1296 |
| ATOM | 1296 | CA  | CYS | 162 | 123.266 | -1.205  | 61.904 | 1.0095.35  | 1SG1297 |
| ATOM | 1297 | CB  | CYS | 162 | 123.204 | 0.090   | 62.731 | 1.0095.35  | 1SG1298 |
| ATOM | 1298 | SG  | CYS | 162 | 124.271 | 0.058   | 64.201 | 1.0095.35  | 1SG1299 |
| ATOM | 1299 | C   | CYS | 162 | 123.113 | -2.331  | 62.872 | 1.0095.35  | 1SG1300 |
| ATOM | 1300 | O   | CYS | 162 | 122.008 | -2.808  | 63.117 | 1.0095.35  | 1SG1301 |
| ATOM | 1301 | N   | GLY | 163 | 124.243 | -2.792  | 63.443 | 1.0066.45  | 1SG1302 |
| ATOM | 1302 | CA  | GLY | 163 | 124.201 | -3.824  | 64.435 | 1.0066.45  | 1SG1303 |
| ATOM | 1303 | C   | GLY | 163 | 124.263 | -5.139  | 63.740 | 1.0066.45  | 1SG1304 |
| ATOM | 1304 | O   | GLY | 163 | 124.165 | -5.220  | 62.519 | 1.0066.45  | 1SG1305 |
| ATOM | 1305 | N   | SER | 164 | 124.432 | -6.221  | 64.526 | 1.00158.18 | 1SG1306 |
| ATOM | 1306 | CA  | SER | 164 | 124.487 | -7.519  | 63.928 | 1.00158.18 | 1SG1307 |
| ATOM | 1307 | CB  | SER | 164 | 125.841 | -8.228  | 64.097 | 1.00158.18 | 1SG1308 |
| ATOM | 1308 | OG  | SER | 164 | 125.801 | -9.504  | 63.476 | 1.00158.18 | 1SG1309 |
| ATOM | 1309 | C   | SER | 164 | 123.463 | -8.368  | 64.601 | 1.00158.18 | 1SG1310 |
| ATOM | 1310 | O   | SER | 164 | 123.235 | -8.262  | 65.804 | 1.00158.18 | 1SG1311 |
| ATOM | 1311 | N   | THR | 165 | 122.796 | -9.220  | 63.807 | 1.00258.79 | 1SG1312 |
| ATOM | 1312 | CA  | THR | 165 | 121.822 | -10.132 | 64.319 | 1.00258.79 | 1SG1313 |
| ATOM | 1313 | CB  | THR | 165 | 120.418 | -9.605  | 64.246 | 1.00258.79 | 1SG1314 |
| ATOM | 1314 | OG1 | THR | 165 | 119.523 | -10.481 | 64.915 | 1.00258.79 | 1SG1315 |
| ATOM | 1315 | CG2 | THR | 165 | 120.021 | -9.456  | 62.767 | 1.00258.79 | 1SG1316 |
| ATOM | 1316 | C   | THR | 165 | 121.905 | -11.313 | 63.418 | 1.00258.79 | 1SG1317 |
| ATOM | 1317 | O   | THR | 165 | 122.708 | -11.321 | 62.486 | 1.00258.79 | 1SG1318 |
| ATOM | 1318 | N   | VAL | 166 | 121.110 | -12.367 | 63.675 | 1.00159.62 | 1SG1319 |
| ATOM | 1319 | CA  | VAL | 166 | 121.177 | -13.425 | 62.717 | 1.00159.62 | 1SG1320 |
| ATOM | 1320 | CB  | VAL | 166 | 120.652 | -14.742 | 63.226 | 1.00159.62 | 1SG1321 |
| ATOM | 1321 | CG1 | VAL | 166 | 119.246 | -14.551 | 63.820 | 1.00159.62 | 1SG1322 |
| ATOM | 1322 | CG2 | VAL | 166 | 120.709 | -15.757 | 62.070 | 1.00159.62 | 1SG1323 |
| ATOM | 1323 | C   | VAL | 166 | 120.365 | -12.949 | 61.558 | 1.00159.62 | 1SG1324 |
| ATOM | 1324 | O   | VAL | 166 | 119.173 | -13.226 | 61.429 | 1.00159.62 | 1SG1325 |
| ATOM | 1325 | N   | GLU | 167 | 121.029 | -12.190 | 60.671 | 1.00309.22 | 1SG1326 |
| ATOM | 1326 | CA  | GLU | 167 | 120.366 | -11.614 | 59.545 | 1.00309.22 | 1SG1327 |
| ATOM | 1327 | CB  | GLU | 167 | 119.532 | -10.375 | 59.918 | 1.00309.22 | 1SG1328 |
| ATOM | 1328 | CG  | GLU | 167 | 118.553 | -9.925  | 58.833 | 1.00309.22 | 1SG1329 |
| ATOM | 1329 | CD  | GLU | 167 | 117.250 | -10.685 | 59.037 | 1.00309.22 | 1SG1330 |
| ATOM | 1330 | OE1 | GLU | 167 | 117.121 | -11.374 | 60.084 | 1.00309.22 | 1SG1331 |
| ATOM | 1331 | OE2 | GLU | 167 | 116.363 | -10.579 | 58.150 | 1.00309.22 | 1SG1332 |
| ATOM | 1332 | C   | GLU | 167 | 121.453 | -11.138 | 58.645 | 1.00309.22 | 1SG1333 |
| ATOM | 1333 | O   | GLU | 167 | 122.629 | -11.183 | 59.004 | 1.00309.22 | 1SG1334 |
| ATOM | 1334 | N   | GLU | 168 | 121.088 | -10.683 | 57.434 | 1.00265.09 | 1SG1335 |
| ATOM | 1335 | CA  | GLU | 168 | 122.089 | -10.156 | 56.561 | 1.00265.09 | 1SG1336 |
| ATOM | 1336 | CB  | GLU | 168 | 121.596 | -9.917  | 55.124 | 1.00265.09 | 1SG1337 |
| ATOM | 1337 | CG  | GLU | 168 | 121.200 | -11.213 | 54.409 | 1.00265.09 | 1SG1338 |
| ATOM | 1338 | CD  | GLU | 168 | 122.429 | -12.108 | 54.323 | 1.00265.09 | 1SG1339 |
| ATOM | 1339 | OE1 | GLU | 168 | 123.525 | -11.651 | 54.743 | 1.00265.09 | 1SG1340 |
| ATOM | 1340 | OE2 | GLU | 168 | 122.288 | -13.263 | 53.839 | 1.00265.09 | 1SG1341 |
| ATOM | 1341 | C   | GLU | 168 | 122.490 | -8.850  | 57.161 | 1.00265.09 | 1SG1342 |
| ATOM | 1342 | O   | GLU | 168 | 121.721 | -8.241  | 57.903 | 1.00265.09 | 1SG1343 |
| ATOM | 1343 | N   | GLU | 169 | 123.729 | -8.401  | 56.888 | 1.00244.93 | 1SG1344 |
| ATOM | 1344 | CA  | GLU | 169 | 124.204 | -7.192  | 57.494 | 1.00244.93 | 1SG1345 |
| ATOM | 1345 | CB  | GLU | 169 | 125.726 | -6.991  | 57.391 | 1.00244.93 | 1SG1346 |
| ATOM | 1346 | CG  | GLU | 169 | 126.551 | -8.041  | 58.140 | 1.00244.93 | 1SG1347 |
| ATOM | 1347 | CD  | GLU | 169 | 126.845 | -9.189  | 57.185 | 1.00244.93 | 1SG1348 |

## Supplementary material 1.txt

|      |      |     |     |     |         |         |        |            |         |
|------|------|-----|-----|-----|---------|---------|--------|------------|---------|
| ATOM | 1348 | OE1 | GLU | 169 | 127.598 | -8.961  | 56.201 | 1.00244.93 | 1SG1349 |
| ATOM | 1349 | OE2 | GLU | 169 | 126.325 | -10.311 | 57.430 | 1.00244.93 | 1SG1350 |
| ATOM | 1350 | C   | GLU | 169 | 123.581 | -6.013  | 56.825 | 1.00244.93 | 1SG1351 |
| ATOM | 1351 | O   | GLU | 169 | 123.243 | -6.049  | 55.643 | 1.00244.93 | 1SG1352 |
| ATOM | 1352 | N   | GLY | 170 | 123.389 | -4.932  | 57.603 | 1.00157.15 | 1SG1353 |
| ATOM | 1353 | CA  | GLY | 170 | 122.908 | -3.705  | 57.048 | 1.00157.15 | 1SG1354 |
| ATOM | 1354 | C   | GLY | 170 | 124.138 | -2.918  | 56.758 | 1.00157.15 | 1SG1355 |
| ATOM | 1355 | O   | GLY | 170 | 125.240 | -3.462  | 56.801 | 1.00157.15 | 1SG1356 |
| ATOM | 1356 | N   | ALA | 171 | 124.010 | -1.611  | 56.460 | 1.00127.08 | 1SG1357 |
| ATOM | 1357 | CA  | ALA | 171 | 125.259 | -0.970  | 56.199 | 1.00127.08 | 1SG1358 |
| ATOM | 1358 | CB  | ALA | 171 | 125.159 | 0.066   | 55.070 | 1.00127.08 | 1SG1359 |
| ATOM | 1359 | C   | ALA | 171 | 125.704 | -0.224  | 57.417 | 1.00127.08 | 1SG1360 |
| ATOM | 1360 | O   | ALA | 171 | 125.878 | 0.992   | 57.379 | 1.00127.08 | 1SG1361 |
| ATOM | 1361 | N   | GLU | 172 | 125.911 | -0.941  | 58.535 | 1.00150.31 | 1SG1362 |
| ATOM | 1362 | CA  | GLU | 172 | 126.454 | -0.349  | 59.721 | 1.00150.31 | 1SG1363 |
| ATOM | 1363 | CB  | GLU | 172 | 126.211 | -1.181  | 60.986 | 1.00150.31 | 1SG1364 |
| ATOM | 1364 | CG  | GLU | 172 | 127.028 | -0.679  | 62.176 | 1.00150.31 | 1SG1365 |
| ATOM | 1365 | CD  | GLU | 172 | 126.670 | 0.779   | 62.435 | 1.00150.31 | 1SG1366 |
| ATOM | 1366 | OE1 | GLU | 172 | 125.717 | 1.293   | 61.790 | 1.00150.31 | 1SG1367 |
| ATOM | 1367 | OE2 | GLU | 172 | 127.352 | 1.398   | 63.295 | 1.00150.31 | 1SG1368 |
| ATOM | 1368 | C   | GLU | 172 | 127.929 | -0.210  | 59.544 | 1.00150.31 | 1SG1369 |
| ATOM | 1369 | O   | GLU | 172 | 128.545 | 0.734   | 60.035 | 1.00150.31 | 1SG1370 |
| ATOM | 1370 | N   | ALA | 173 | 128.522 | -1.171  | 58.812 | 1.00 46.67 | 1SG1371 |
| ATOM | 1371 | CA  | ALA | 173 | 129.938 | -1.271  | 58.612 | 1.00 46.67 | 1SG1372 |
| ATOM | 1372 | CB  | ALA | 173 | 130.340 | -2.463  | 57.727 | 1.00 46.67 | 1SG1373 |
| ATOM | 1373 | C   | ALA | 173 | 130.408 | -0.031  | 57.936 | 1.00 46.67 | 1SG1374 |
| ATOM | 1374 | O   | ALA | 173 | 131.524 | 0.429   | 58.164 | 1.00 46.67 | 1SG1375 |
| ATOM | 1375 | N   | TYR | 174 | 129.540 | 0.540   | 57.091 | 1.00132.03 | 1SG1376 |
| ATOM | 1376 | CA  | TYR | 174 | 129.804 | 1.690   | 56.280 | 1.00132.03 | 1SG1377 |
| ATOM | 1377 | CB  | TYR | 174 | 128.658 | 2.006   | 55.307 | 1.00132.03 | 1SG1378 |
| ATOM | 1378 | CG  | TYR | 174 | 128.711 | 0.918   | 54.288 | 1.00132.03 | 1SG1379 |
| ATOM | 1379 | CD1 | TYR | 174 | 128.025 | -0.258  | 54.483 | 1.00132.03 | 1SG1380 |
| ATOM | 1380 | CD2 | TYR | 174 | 129.473 | 1.060   | 53.150 | 1.00132.03 | 1SG1381 |
| ATOM | 1381 | CE1 | TYR | 174 | 128.076 | -1.268  | 53.552 | 1.00132.03 | 1SG1382 |
| ATOM | 1382 | CE2 | TYR | 174 | 129.529 | 0.053   | 52.214 | 1.00132.03 | 1SG1383 |
| ATOM | 1383 | CZ  | TYR | 174 | 128.828 | -1.113  | 52.412 | 1.00132.03 | 1SG1384 |
| ATOM | 1384 | OH  | TYR | 174 | 128.884 | -2.148  | 51.454 | 1.00132.03 | 1SG1385 |
| ATOM | 1385 | C   | TYR | 174 | 130.130 | 2.893   | 57.115 | 1.00132.03 | 1SG1386 |
| ATOM | 1386 | O   | TYR | 174 | 130.778 | 3.819   | 56.631 | 1.00132.03 | 1SG1387 |
| ATOM | 1387 | N   | ASN | 175 | 129.681 | 2.928   | 58.382 | 1.00105.05 | 1SG1388 |
| ATOM | 1388 | CA  | ASN | 175 | 129.871 | 4.073   | 59.233 | 1.00105.05 | 1SG1389 |
| ATOM | 1389 | CB  | ASN | 175 | 129.480 | 3.799   | 60.693 | 1.00105.05 | 1SG1390 |
| ATOM | 1390 | CG  | ASN | 175 | 130.492 | 2.830   | 61.283 | 1.00105.05 | 1SG1391 |
| ATOM | 1391 | OD1 | ASN | 175 | 130.765 | 1.769   | 60.725 | 1.00105.05 | 1SG1392 |
| ATOM | 1392 | ND2 | ASN | 175 | 131.077 | 3.215   | 62.450 | 1.00105.05 | 1SG1393 |
| ATOM | 1393 | C   | ASN | 175 | 131.326 | 4.448   | 59.246 | 1.00105.05 | 1SG1394 |
| ATOM | 1394 | O   | ASN | 175 | 131.673 | 5.606   | 59.475 | 1.00105.05 | 1SG1395 |
| ATOM | 1395 | N   | LYS | 176 | 132.214 | 3.458   | 59.057 | 1.00139.25 | 1SG1396 |
| ATOM | 1396 | CA  | LYS | 176 | 133.639 | 3.642   | 59.052 | 1.00139.25 | 1SG1397 |
| ATOM | 1397 | CB  | LYS | 176 | 134.388 | 2.306   | 58.928 | 1.00139.25 | 1SG1398 |
| ATOM | 1398 | CG  | LYS | 176 | 133.986 | 1.531   | 57.671 | 1.00139.25 | 1SG1399 |
| ATOM | 1399 | CD  | LYS | 176 | 134.944 | 0.403   | 57.293 | 1.00139.25 | 1SG1400 |
| ATOM | 1400 | CE  | LYS | 176 | 135.855 | 0.752   | 56.115 | 1.00139.25 | 1SG1401 |
| ATOM | 1401 | NZ  | LYS | 176 | 135.057 | 0.836   | 54.870 | 1.00139.25 | 1SG1402 |
| ATOM | 1402 | C   | LYS | 176 | 134.114 | 4.498   | 57.906 | 1.00139.25 | 1SG1403 |
| ATOM | 1403 | O   | LYS | 176 | 135.053 | 5.272   | 58.085 | 1.00139.25 | 1SG1404 |
| ATOM | 1404 | N   | HIS | 177 | 133.508 | 4.392   | 56.700 | 1.00119.24 | 1SG1405 |
| ATOM | 1405 | CA  | HIS | 177 | 134.083 | 5.083   | 55.572 | 1.00119.24 | 1SG1406 |
| ATOM | 1406 | ND1 | HIS | 177 | 134.851 | 6.034   | 52.575 | 1.00119.24 | 1SG1407 |
| ATOM | 1407 | CG  | HIS | 177 | 134.845 | 4.800   | 53.183 | 1.00119.24 | 1SG1408 |
| ATOM | 1408 | CB  | HIS | 177 | 133.859 | 4.369   | 54.229 | 1.00119.24 | 1SG1409 |
| ATOM | 1409 | NE2 | HIS | 177 | 136.561 | 4.901   | 51.721 | 1.00119.24 | 1SG1410 |
| ATOM | 1410 | CD2 | HIS | 177 | 135.895 | 4.120   | 52.648 | 1.00119.24 | 1SG1411 |
| ATOM | 1411 | CE1 | HIS | 177 | 135.897 | 6.042   | 51.711 | 1.00119.24 | 1SG1412 |
| ATOM | 1412 | C   | HIS | 177 | 133.539 | 6.476   | 55.448 | 1.00119.24 | 1SG1413 |
| ATOM | 1413 | O   | HIS | 177 | 132.371 | 6.697   | 55.128 | 1.00119.24 | 1SG1414 |
| ATOM | 1414 | N   | VAL | 178 | 134.433 | 7.455   | 55.689 | 1.00 70.62 | 1SG1415 |
| ATOM | 1415 | CA  | VAL | 178 | 134.158 | 8.863   | 55.694 | 1.00 70.62 | 1SG1416 |
| ATOM | 1416 | CB  | VAL | 178 | 135.402 | 9.633   | 56.016 | 1.00 70.62 | 1SG1417 |
| ATOM | 1417 | CG1 | VAL | 178 | 135.065 | 11.132  | 56.075 | 1.00 70.62 | 1SG1418 |
| ATOM | 1418 | CG2 | VAL | 178 | 136.086 | 9.004   | 57.239 | 1.00 70.62 | 1SG1419 |

## Supplementary material 1.txt

|      |      |     |     |     |         |        |        |      |        |         |
|------|------|-----|-----|-----|---------|--------|--------|------|--------|---------|
| ATOM | 1419 | C   | VAL | 178 | 133.777 | 9.314  | 54.319 | 1.00 | 70.62  | 1SG1420 |
| ATOM | 1420 | O   | VAL | 178 | 132.753 | 9.964  | 54.117 | 1.00 | 70.62  | 1SG1421 |
| ATOM | 1421 | N   | ARG | 179 | 134.605 | 8.951  | 53.323 | 1.00 | 110.89 | 1SG1422 |
| ATOM | 1422 | CA  | ARG | 179 | 134.411 | 9.405  | 51.980 | 1.00 | 110.89 | 1SG1423 |
| ATOM | 1423 | CB  | ARG | 179 | 135.541 | 8.978  | 51.029 | 1.00 | 110.89 | 1SG1424 |
| ATOM | 1424 | CG  | ARG | 179 | 136.852 | 9.713  | 51.314 | 1.00 | 110.89 | 1SG1425 |
| ATOM | 1425 | CD  | ARG | 179 | 136.905 | 11.119 | 50.710 | 1.00 | 110.89 | 1SG1426 |
| ATOM | 1426 | NE  | ARG | 179 | 138.102 | 11.805 | 51.275 | 1.00 | 110.89 | 1SG1427 |
| ATOM | 1427 | CZ  | ARG | 179 | 138.885 | 12.594 | 50.483 | 1.00 | 110.89 | 1SG1428 |
| ATOM | 1428 | NH1 | ARG | 179 | 138.609 | 12.719 | 49.150 | 1.00 | 110.89 | 1SG1429 |
| ATOM | 1429 | NH2 | ARG | 179 | 139.944 | 13.259 | 51.027 | 1.00 | 110.89 | 1SG1430 |
| ATOM | 1430 | C   | ARG | 179 | 133.119 | 8.871  | 51.460 | 1.00 | 110.89 | 1SG1431 |
| ATOM | 1431 | O   | ARG | 179 | 132.460 | 9.518  | 50.649 | 1.00 | 110.89 | 1SG1432 |
| ATOM | 1432 | N   | CYS | 180 | 132.752 | 7.643  | 51.865 | 1.00 | 37.04  | 1SG1433 |
| ATOM | 1433 | CA  | CYS | 180 | 131.533 | 7.057  | 51.389 | 1.00 | 37.04  | 1SG1434 |
| ATOM | 1434 | CB  | CYS | 180 | 131.369 | 5.582  | 51.797 | 1.00 | 37.04  | 1SG1435 |
| ATOM | 1435 | SG  | CYS | 180 | 132.610 | 4.490  | 51.040 | 1.00 | 37.04  | 1SG1436 |
| ATOM | 1436 | C   | CYS | 180 | 130.370 | 7.796  | 51.966 | 1.00 | 37.04  | 1SG1437 |
| ATOM | 1437 | O   | CYS | 180 | 129.406 | 8.106  | 51.269 | 1.00 | 37.04  | 1SG1438 |
| ATOM | 1438 | N   | MET | 181 | 130.444 | 8.095  | 53.276 | 1.00 | 80.22  | 1SG1439 |
| ATOM | 1439 | CA  | MET | 181 | 129.370 | 8.721  | 53.989 | 1.00 | 80.22  | 1SG1440 |
| ATOM | 1440 | CB  | MET | 181 | 129.666 | 8.851  | 55.492 | 1.00 | 80.22  | 1SG1441 |
| ATOM | 1441 | CG  | MET | 181 | 129.801 | 7.498  | 56.195 | 1.00 | 80.22  | 1SG1442 |
| ATOM | 1442 | SD  | MET | 181 | 130.249 | 7.606  | 57.952 | 1.00 | 80.22  | 1SG1443 |
| ATOM | 1443 | CE  | MET | 181 | 131.939 | 8.184  | 57.622 | 1.00 | 80.22  | 1SG1444 |
| ATOM | 1444 | C   | MET | 181 | 129.131 | 10.093 | 53.444 | 1.00 | 80.22  | 1SG1445 |
| ATOM | 1445 | O   | MET | 181 | 127.985 | 10.509 | 53.274 | 1.00 | 80.22  | 1SG1446 |
| ATOM | 1446 | N   | LEU | 182 | 130.216 | 10.831 | 53.148 | 1.00 | 52.19  | 1SG1447 |
| ATOM | 1447 | CA  | LEU | 182 | 130.099 | 12.184 | 52.688 | 1.00 | 52.19  | 1SG1448 |
| ATOM | 1448 | CB  | LEU | 182 | 131.462 | 12.873 | 52.519 | 1.00 | 52.19  | 1SG1449 |
| ATOM | 1449 | CG  | LEU | 182 | 131.345 | 14.323 | 52.019 | 1.00 | 52.19  | 1SG1450 |
| ATOM | 1450 | CD2 | LEU | 182 | 132.727 | 14.902 | 51.683 | 1.00 | 52.19  | 1SG1451 |
| ATOM | 1451 | CD1 | LEU | 182 | 130.566 | 15.196 | 53.016 | 1.00 | 52.19  | 1SG1452 |
| ATOM | 1452 | C   | LEU | 182 | 129.407 | 12.233 | 51.358 | 1.00 | 52.19  | 1SG1453 |
| ATOM | 1453 | O   | LEU | 182 | 128.500 | 13.038 | 51.153 | 1.00 | 52.19  | 1SG1454 |
| ATOM | 1454 | N   | SER | 183 | 129.810 | 11.358 | 50.417 | 1.00 | 68.86  | 1SG1455 |
| ATOM | 1455 | CA  | SER | 183 | 129.265 | 11.365 | 49.087 | 1.00 | 68.86  | 1SG1456 |
| ATOM | 1456 | CB  | SER | 183 | 129.969 | 10.356 | 48.163 | 1.00 | 68.86  | 1SG1457 |
| ATOM | 1457 | OG  | SER | 183 | 129.403 | 10.401 | 46.862 | 1.00 | 68.86  | 1SG1458 |
| ATOM | 1458 | C   | SER | 183 | 127.818 | 10.998 | 49.149 | 1.00 | 68.86  | 1SG1459 |
| ATOM | 1459 | O   | SER | 183 | 127.018 | 11.461 | 48.337 | 1.00 | 68.86  | 1SG1460 |
| ATOM | 1460 | N   | LEU | 184 | 127.458 | 10.119 | 50.102 | 1.00 | 51.71  | 1SG1461 |
| ATOM | 1461 | CA  | LEU | 184 | 126.104 | 9.680  | 50.286 | 1.00 | 51.71  | 1SG1462 |
| ATOM | 1462 | CB  | LEU | 184 | 126.012 | 8.532  | 51.315 | 1.00 | 51.71  | 1SG1463 |
| ATOM | 1463 | CG  | LEU | 184 | 124.591 | 7.992  | 51.575 | 1.00 | 51.71  | 1SG1464 |
| ATOM | 1464 | CD2 | LEU | 184 | 124.592 | 6.957  | 52.714 | 1.00 | 51.71  | 1SG1465 |
| ATOM | 1465 | CD1 | LEU | 184 | 123.962 | 7.431  | 50.291 | 1.00 | 51.71  | 1SG1466 |
| ATOM | 1466 | C   | LEU | 184 | 125.290 | 10.842 | 50.772 | 1.00 | 51.71  | 1SG1467 |
| ATOM | 1467 | O   | LEU | 184 | 124.153 | 11.041 | 50.347 | 1.00 | 51.71  | 1SG1468 |
| ATOM | 1468 | N   | SER | 185 | 125.871 | 11.651 | 51.680 | 1.00 | 33.38  | 1SG1469 |
| ATOM | 1469 | CA  | SER | 185 | 125.184 | 12.769 | 52.261 | 1.00 | 33.38  | 1SG1470 |
| ATOM | 1470 | CB  | SER | 185 | 126.058 | 13.529 | 53.274 | 1.00 | 33.38  | 1SG1471 |
| ATOM | 1471 | OG  | SER | 185 | 125.339 | 14.625 | 53.822 | 1.00 | 33.38  | 1SG1472 |
| ATOM | 1472 | C   | SER | 185 | 124.805 | 13.734 | 51.183 | 1.00 | 33.38  | 1SG1473 |
| ATOM | 1473 | O   | SER | 185 | 123.687 | 14.247 | 51.157 | 1.00 | 33.38  | 1SG1474 |
| ATOM | 1474 | N   | ARG | 186 | 125.737 | 14.017 | 50.259 | 1.00 | 84.52  | 1SG1475 |
| ATOM | 1475 | CA  | ARG | 186 | 125.477 | 14.961 | 49.211 | 1.00 | 84.52  | 1SG1476 |
| ATOM | 1476 | CB  | ARG | 186 | 126.751 | 15.332 | 48.433 | 1.00 | 84.52  | 1SG1477 |
| ATOM | 1477 | CG  | ARG | 186 | 127.678 | 16.156 | 49.332 | 1.00 | 84.52  | 1SG1478 |
| ATOM | 1478 | CD  | ARG | 186 | 129.032 | 16.539 | 48.736 | 1.00 | 84.52  | 1SG1479 |
| ATOM | 1479 | NE  | ARG | 186 | 129.710 | 17.384 | 49.762 | 1.00 | 84.52  | 1SG1480 |
| ATOM | 1480 | CZ  | ARG | 186 | 131.043 | 17.247 | 50.022 | 1.00 | 84.52  | 1SG1481 |
| ATOM | 1481 | NH1 | ARG | 186 | 131.788 | 16.329 | 49.340 | 1.00 | 84.52  | 1SG1482 |
| ATOM | 1482 | NH2 | ARG | 186 | 131.629 | 18.031 | 50.973 | 1.00 | 84.52  | 1SG1483 |
| ATOM | 1483 | C   | ARG | 186 | 124.419 | 14.428 | 48.293 | 1.00 | 84.52  | 1SG1484 |
| ATOM | 1484 | O   | ARG | 186 | 123.557 | 15.171 | 47.830 | 1.00 | 84.52  | 1SG1485 |
| ATOM | 1485 | N   | ALA | 187 | 124.458 | 13.112 | 48.022 | 1.00 | 43.91  | 1SG1486 |
| ATOM | 1486 | CA  | ALA | 187 | 123.545 | 12.444 | 47.136 | 1.00 | 43.91  | 1SG1487 |
| ATOM | 1487 | CB  | ALA | 187 | 123.907 | 10.966 | 46.919 | 1.00 | 43.91  | 1SG1488 |
| ATOM | 1488 | C   | ALA | 187 | 122.143 | 12.492 | 47.673 | 1.00 | 43.91  | 1SG1489 |
| ATOM | 1489 | O   | ALA | 187 | 121.182 | 12.552 | 46.908 | 1.00 | 43.91  | 1SG1490 |

## Supplementary material 1.txt

|      |      |     |     |     |         |        |        |            |       |         |
|------|------|-----|-----|-----|---------|--------|--------|------------|-------|---------|
| ATOM | 1490 | N   | SER | 188 | 121.984 | 12.448 | 49.009 | 1.00       | 54.18 | 1SG1491 |
| ATOM | 1491 | CA  | SER | 188 | 120.686 | 12.366 | 49.626 | 1.00       | 54.18 | 1SG1492 |
| ATOM | 1492 | CB  | SER | 188 | 120.758 | 12.261 | 51.159 | 1.00       | 54.18 | 1SG1493 |
| ATOM | 1493 | OG  | SER | 188 | 121.270 | 13.465 | 51.712 | 1.00       | 54.18 | 1SG1494 |
| ATOM | 1494 | C   | SER | 188 | 119.837 | 13.567 | 49.295 | 1.00       | 54.18 | 1SG1495 |
| ATOM | 1495 | O   | SER | 188 | 118.614 | 13.495 | 49.384 | 1.00       | 54.18 | 1SG1496 |
| ATOM | 1496 | N   | ASN | 189 | 120.457 | 14.710 | 48.945 | 1.00       | 89.67 | 1SG1497 |
| ATOM | 1497 | CA  | ASN | 189 | 119.775 | 15.947 | 48.647 | 1.00       | 89.67 | 1SG1498 |
| ATOM | 1498 | CB  | ASN | 189 | 120.743 | 17.141 | 48.595 | 1.00       | 89.67 | 1SG1499 |
| ATOM | 1499 | CG  | ASN | 189 | 121.401 | 17.276 | 49.961 | 1.00       | 89.67 | 1SG1500 |
| ATOM | 1500 | OD1 | ASN | 189 | 122.627 | 17.259 | 50.070 | 1.00       | 89.67 | 1SG1501 |
| ATOM | 1501 | ND2 | ASN | 189 | 120.572 | 17.409 | 51.030 | 1.00       | 89.67 | 1SG1502 |
| ATOM | 1502 | C   | ASN | 189 | 119.050 | 15.913 | 47.323 | 1.00       | 89.67 | 1SG1503 |
| ATOM | 1503 | O   | ASN | 189 | 118.094 | 16.655 | 47.123 | 1.00       | 89.67 | 1SG1504 |
| ATOM | 1504 | N   | ILE | 190 | 119.574 | 15.137 | 46.360 | 1.00231.84 |       | 1SG1505 |
| ATOM | 1505 | CA  | ILE | 190 | 119.167 | 14.940 | 44.986 | 1.00231.84 |       | 1SG1506 |
| ATOM | 1506 | CB  | ILE | 190 | 120.300 | 14.351 | 44.165 | 1.00231.84 |       | 1SG1507 |
| ATOM | 1507 | CG2 | ILE | 190 | 119.827 | 14.010 | 42.740 | 1.00231.84 |       | 1SG1508 |
| ATOM | 1508 | CG1 | ILE | 190 | 121.489 | 15.328 | 44.131 | 1.00231.84 |       | 1SG1509 |
| ATOM | 1509 | CD1 | ILE | 190 | 122.224 | 15.493 | 45.458 | 1.00231.84 |       | 1SG1510 |
| ATOM | 1510 | C   | ILE | 190 | 117.908 | 14.115 | 44.824 | 1.00231.84 |       | 1SG1511 |
| ATOM | 1511 | O   | ILE | 190 | 117.311 | 14.114 | 43.752 | 1.00231.84 |       | 1SG1512 |
| ATOM | 1512 | N   | LEU | 191 | 117.519 | 13.306 | 45.828 | 1.00129.30 |       | 1SG1513 |
| ATOM | 1513 | CA  | LEU | 191 | 116.447 | 12.347 | 45.685 | 1.00129.30 |       | 1SG1514 |
| ATOM | 1514 | CB  | LEU | 191 | 116.205 | 11.500 | 46.945 | 1.00129.30 |       | 1SG1515 |
| ATOM | 1515 | CG  | LEU | 191 | 115.417 | 12.231 | 48.051 | 1.00129.30 |       | 1SG1516 |
| ATOM | 1516 | CD2 | LEU | 191 | 116.023 | 13.604 | 48.382 | 1.00129.30 |       | 1SG1517 |
| ATOM | 1517 | CD1 | LEU | 191 | 115.243 | 11.332 | 49.284 | 1.00129.30 |       | 1SG1518 |
| ATOM | 1518 | C   | LEU | 191 | 115.119 | 12.953 | 45.329 | 1.00129.30 |       | 1SG1519 |
| ATOM | 1519 | O   | LEU | 191 | 114.818 | 14.101 | 45.649 | 1.00129.30 |       | 1SG1520 |
| ATOM | 1520 | N   | PHE | 192 | 114.284 | 12.139 | 44.632 | 1.00126.36 |       | 1SG1521 |
| ATOM | 1521 | CA  | PHE | 192 | 112.963 | 12.522 | 44.207 | 1.00126.36 |       | 1SG1522 |
| ATOM | 1522 | CB  | PHE | 192 | 112.756 | 12.443 | 42.678 | 1.00126.36 |       | 1SG1523 |
| ATOM | 1523 | CG  | PHE | 192 | 112.863 | 11.042 | 42.189 | 1.00126.36 |       | 1SG1524 |
| ATOM | 1524 | CD1 | PHE | 192 | 114.094 | 10.460 | 41.997 | 1.00126.36 |       | 1SG1525 |
| ATOM | 1525 | CD2 | PHE | 192 | 111.729 | 10.310 | 41.926 | 1.00126.36 |       | 1SG1526 |
| ATOM | 1526 | CE1 | PHE | 192 | 114.196 | 9.167  | 41.542 | 1.00126.36 |       | 1SG1527 |
| ATOM | 1527 | CE2 | PHE | 192 | 111.826 | 9.018  | 41.468 | 1.00126.36 |       | 1SG1528 |
| ATOM | 1528 | CZ  | PHE | 192 | 113.059 | 8.444  | 41.276 | 1.00126.36 |       | 1SG1529 |
| ATOM | 1529 | C   | PHE | 192 | 111.989 | 11.630 | 44.930 | 1.00126.36 |       | 1SG1530 |
| ATOM | 1530 | O   | PHE | 192 | 112.385 | 10.934 | 45.861 | 1.00126.36 |       | 1SG1531 |
| ATOM | 1531 | N   | PRO | 193 | 110.720 | 11.664 | 44.604 | 1.00119.21 |       | 1SG1532 |
| ATOM | 1532 | CA  | PRO | 193 | 109.753 | 10.852 | 45.304 | 1.00119.21 |       | 1SG1533 |
| ATOM | 1533 | CD  | PRO | 193 | 110.103 | 12.863 | 44.064 | 1.00119.21 |       | 1SG1534 |
| ATOM | 1534 | CB  | PRO | 193 | 108.376 | 11.390 | 44.902 | 1.00119.21 |       | 1SG1535 |
| ATOM | 1535 | CG  | PRO | 193 | 108.657 | 12.426 | 43.797 | 1.00119.21 |       | 1SG1536 |
| ATOM | 1536 | C   | PRO | 193 | 109.895 | 9.363  | 45.149 | 1.00119.21 |       | 1SG1537 |
| ATOM | 1537 | O   | PRO | 193 | 109.434 | 8.636  | 46.028 | 1.00119.21 |       | 1SG1538 |
| ATOM | 1538 | N   | GLY | 194 | 110.480 | 8.891  | 44.034 | 1.00       | 70.01 | 1SG1539 |
| ATOM | 1539 | CA  | GLY | 194 | 110.687 | 7.497  | 43.715 | 1.00       | 70.01 | 1SG1540 |
| ATOM | 1540 | C   | GLY | 194 | 111.740 | 6.889  | 44.602 | 1.00       | 70.01 | 1SG1541 |
| ATOM | 1541 | O   | GLY | 194 | 111.859 | 5.672  | 44.722 | 1.00       | 70.01 | 1SG1542 |
| ATOM | 1542 | N   | GLU | 195 | 112.577 | 7.769  | 45.158 | 1.00201.20 |       | 1SG1543 |
| ATOM | 1543 | CA  | GLU | 195 | 113.797 | 7.618  | 45.899 | 1.00201.20 |       | 1SG1544 |
| ATOM | 1544 | CB  | GLU | 195 | 114.599 | 8.923  | 45.934 | 1.00201.20 |       | 1SG1545 |
| ATOM | 1545 | CG  | GLU | 195 | 116.089 | 8.671  | 46.118 | 1.00201.20 |       | 1SG1546 |
| ATOM | 1546 | CD  | GLU | 195 | 116.620 | 8.099  | 44.810 | 1.00201.20 |       | 1SG1547 |
| ATOM | 1547 | OE1 | GLU | 195 | 115.811 | 7.931  | 43.859 | 1.00201.20 |       | 1SG1548 |
| ATOM | 1548 | OE2 | GLU | 195 | 117.846 | 7.821  | 44.745 | 1.00201.20 |       | 1SG1549 |
| ATOM | 1549 | C   | GLU | 195 | 113.687 | 7.088  | 47.309 | 1.00201.20 |       | 1SG1550 |
| ATOM | 1550 | O   | GLU | 195 | 114.631 | 7.260  | 48.075 | 1.00201.20 |       | 1SG1551 |
| ATOM | 1551 | N   | LYS | 196 | 112.545 | 6.521  | 47.739 | 1.00       | 78.77 | 1SG1552 |
| ATOM | 1552 | CA  | LYS | 196 | 112.323 | 6.121  | 49.111 | 1.00       | 78.77 | 1SG1553 |
| ATOM | 1553 | CB  | LYS | 196 | 111.023 | 5.320  | 49.305 | 1.00       | 78.77 | 1SG1554 |
| ATOM | 1554 | CG  | LYS | 196 | 109.749 | 6.147  | 49.117 | 1.00       | 78.77 | 1SG1555 |
| ATOM | 1555 | CD  | LYS | 196 | 108.473 | 5.302  | 49.071 | 1.00       | 78.77 | 1SG1556 |
| ATOM | 1556 | CE  | LYS | 196 | 107.191 | 6.132  | 48.973 | 1.00       | 78.77 | 1SG1557 |
| ATOM | 1557 | NZ  | LYS | 196 | 106.010 | 5.240  | 48.936 | 1.00       | 78.77 | 1SG1558 |
| ATOM | 1558 | C   | LYS | 196 | 113.445 | 5.277  | 49.671 | 1.00       | 78.77 | 1SG1559 |
| ATOM | 1559 | O   | LYS | 196 | 113.619 | 5.237  | 50.887 | 1.00       | 78.77 | 1SG1560 |
| ATOM | 1560 | N   | VAL | 197 | 114.223 | 4.555  | 48.844 | 1.00118.43 |       | 1SG1561 |

## Supplementary material 1.txt

|      |      |     |     |     |         |        |        |            |         |
|------|------|-----|-----|-----|---------|--------|--------|------------|---------|
| ATOM | 1561 | CA  | VAL | 197 | 115.281 | 3.729  | 49.373 | 1.00118.43 | 1SG1562 |
| ATOM | 1562 | CB  | VAL | 197 | 116.049 | 3.003  | 48.311 | 1.00118.43 | 1SG1563 |
| ATOM | 1563 | CG1 | VAL | 197 | 116.774 | 4.044  | 47.449 | 1.00118.43 | 1SG1564 |
| ATOM | 1564 | CG2 | VAL | 197 | 116.992 | 1.995  | 48.989 | 1.00118.43 | 1SG1565 |
| ATOM | 1565 | C   | VAL | 197 | 116.261 | 4.583  | 50.140 | 1.00118.43 | 1SG1566 |
| ATOM | 1566 | O   | VAL | 197 | 116.928 | 4.106  | 51.056 | 1.00118.43 | 1SG1567 |
| ATOM | 1567 | N   | MET | 198 | 116.406 | 5.847  | 49.706 | 1.00168.49 | 1SG1568 |
| ATOM | 1568 | CA  | MET | 198 | 117.216 | 6.950  | 50.165 | 1.00168.49 | 1SG1569 |
| ATOM | 1569 | CB  | MET | 198 | 117.317 | 8.066  | 49.108 | 1.00168.49 | 1SG1570 |
| ATOM | 1570 | CG  | MET | 198 | 118.258 | 9.212  | 49.487 | 1.00168.49 | 1SG1571 |
| ATOM | 1571 | SD  | MET | 198 | 120.027 | 8.809  | 49.380 | 1.00168.49 | 1SG1572 |
| ATOM | 1572 | CE  | MET | 198 | 120.066 | 8.842  | 47.564 | 1.00168.49 | 1SG1573 |
| ATOM | 1573 | C   | MET | 198 | 116.701 | 7.596  | 51.426 | 1.00168.49 | 1SG1574 |
| ATOM | 1574 | O   | MET | 198 | 117.370 | 8.468  | 51.972 | 1.00168.49 | 1SG1575 |
| ATOM | 1575 | N   | GLU | 199 | 115.476 | 7.281  | 51.881 | 1.00 69.46 | 1SG1576 |
| ATOM | 1576 | CA  | GLU | 199 | 114.858 | 8.024  | 52.952 | 1.00 69.46 | 1SG1577 |
| ATOM | 1577 | CB  | GLU | 199 | 113.538 | 7.384  | 53.420 | 1.00 69.46 | 1SG1578 |
| ATOM | 1578 | CG  | GLU | 199 | 113.708 | 5.970  | 53.986 | 1.00 69.46 | 1SG1579 |
| ATOM | 1579 | CD  | GLU | 199 | 112.341 | 5.445  | 54.410 | 1.00 69.46 | 1SG1580 |
| ATOM | 1580 | OE1 | GLU | 199 | 111.345 | 6.201  | 54.260 | 1.00 69.46 | 1SG1581 |
| ATOM | 1581 | OE2 | GLU | 199 | 112.274 | 4.281  | 54.890 | 1.00 69.46 | 1SG1582 |
| ATOM | 1582 | C   | GLU | 199 | 115.747 | 8.153  | 54.164 | 1.00 69.46 | 1SG1583 |
| ATOM | 1583 | O   | GLU | 199 | 115.824 | 9.235  | 54.743 | 1.00 69.46 | 1SG1584 |
| ATOM | 1584 | N   | GLU | 200 | 116.398 | 7.062  | 54.613 | 1.00 83.26 | 1SG1585 |
| ATOM | 1585 | CA  | GLU | 200 | 117.263 | 7.042  | 55.771 | 1.00 83.26 | 1SG1586 |
| ATOM | 1586 | CB  | GLU | 200 | 117.398 | 5.654  | 56.423 | 1.00 83.26 | 1SG1587 |
| ATOM | 1587 | CG  | GLU | 200 | 116.108 | 5.218  | 57.126 | 1.00 83.26 | 1SG1588 |
| ATOM | 1588 | CD  | GLU | 200 | 116.410 | 4.027  | 58.027 | 1.00 83.26 | 1SG1589 |
| ATOM | 1589 | OE1 | GLU | 200 | 117.601 | 3.621  | 58.092 | 1.00 83.26 | 1SG1590 |
| ATOM | 1590 | OE2 | GLU | 200 | 115.456 | 3.512  | 58.671 | 1.00 83.26 | 1SG1591 |
| ATOM | 1591 | C   | GLU | 200 | 118.641 | 7.600  | 55.520 | 1.00 83.26 | 1SG1592 |
| ATOM | 1592 | O   | GLU | 200 | 119.366 | 7.888  | 56.470 | 1.00 83.26 | 1SG1593 |
| ATOM | 1593 | N   | ALA | 201 | 119.058 | 7.733  | 54.248 | 1.00 62.52 | 1SG1594 |
| ATOM | 1594 | CA  | ALA | 201 | 120.412 | 8.066  | 53.887 | 1.00 62.52 | 1SG1595 |
| ATOM | 1595 | CB  | ALA | 201 | 120.593 | 8.187  | 52.364 | 1.00 62.52 | 1SG1596 |
| ATOM | 1596 | C   | ALA | 201 | 120.895 | 9.353  | 54.499 | 1.00 62.52 | 1SG1597 |
| ATOM | 1597 | O   | ALA | 201 | 122.051 | 9.424  | 54.914 | 1.00 62.52 | 1SG1598 |
| ATOM | 1598 | N   | LYS | 202 | 120.068 | 10.416 | 54.549 | 1.00 63.82 | 1SG1599 |
| ATOM | 1599 | CA  | LYS | 202 | 120.540 | 11.655 | 55.109 | 1.00 63.82 | 1SG1600 |
| ATOM | 1600 | CB  | LYS | 202 | 119.533 | 12.812 | 54.992 | 1.00 63.82 | 1SG1601 |
| ATOM | 1601 | CG  | LYS | 202 | 120.079 | 14.106 | 55.599 | 1.00 63.82 | 1SG1602 |
| ATOM | 1602 | CD  | LYS | 202 | 119.222 | 15.343 | 55.331 | 1.00 63.82 | 1SG1603 |
| ATOM | 1603 | CE  | LYS | 202 | 118.259 | 15.669 | 56.474 | 1.00 63.82 | 1SG1604 |
| ATOM | 1604 | NZ  | LYS | 202 | 117.482 | 16.887 | 56.156 | 1.00 63.82 | 1SG1605 |
| ATOM | 1605 | C   | LYS | 202 | 120.829 | 11.503 | 56.571 | 1.00 63.82 | 1SG1606 |
| ATOM | 1606 | O   | LYS | 202 | 121.871 | 11.939 | 57.056 | 1.00 63.82 | 1SG1607 |
| ATOM | 1607 | N   | ALA | 203 | 119.903 | 10.877 | 57.318 | 1.00 29.95 | 1SG1608 |
| ATOM | 1608 | CA  | ALA | 203 | 120.058 | 10.747 | 58.738 | 1.00 29.95 | 1SG1609 |
| ATOM | 1609 | CB  | ALA | 203 | 118.844 | 10.083 | 59.409 | 1.00 29.95 | 1SG1610 |
| ATOM | 1610 | C   | ALA | 203 | 121.257 | 9.907  | 59.040 | 1.00 29.95 | 1SG1611 |
| ATOM | 1611 | O   | ALA | 203 | 122.014 | 10.207 | 59.961 | 1.00 29.95 | 1SG1612 |
| ATOM | 1612 | N   | PHE | 204 | 121.448 | 8.820  | 58.270 | 1.00 69.46 | 1SG1613 |
| ATOM | 1613 | CA  | PHE | 204 | 122.508 | 7.885  | 58.517 | 1.00 69.46 | 1SG1614 |
| ATOM | 1614 | CB  | PHE | 204 | 122.414 | 6.654  | 57.596 | 1.00 69.46 | 1SG1615 |
| ATOM | 1615 | CG  | PHE | 204 | 123.522 | 5.709  | 57.920 | 1.00 69.46 | 1SG1616 |
| ATOM | 1616 | CD1 | PHE | 204 | 123.432 | 4.852  | 58.995 | 1.00 69.46 | 1SG1617 |
| ATOM | 1617 | CD2 | PHE | 204 | 124.649 | 5.669  | 57.132 | 1.00 69.46 | 1SG1618 |
| ATOM | 1618 | CE1 | PHE | 204 | 124.455 | 3.978  | 59.285 | 1.00 69.46 | 1SG1619 |
| ATOM | 1619 | CE2 | PHE | 204 | 125.673 | 4.798  | 57.416 | 1.00 69.46 | 1SG1620 |
| ATOM | 1620 | CZ  | PHE | 204 | 125.580 | 3.953  | 58.495 | 1.00 69.46 | 1SG1621 |
| ATOM | 1621 | C   | PHE | 204 | 123.853 | 8.529  | 58.329 | 1.00 69.46 | 1SG1622 |
| ATOM | 1622 | O   | PHE | 204 | 124.705 | 8.465  | 59.213 | 1.00 69.46 | 1SG1623 |
| ATOM | 1623 | N   | THR | 205 | 124.067 | 9.199  | 57.179 | 1.00117.43 | 1SG1624 |
| ATOM | 1624 | CA  | THR | 205 | 125.338 | 9.793  | 56.866 | 1.00117.43 | 1SG1625 |
| ATOM | 1625 | CB  | THR | 205 | 125.388 | 10.383 | 55.487 | 1.00117.43 | 1SG1626 |
| ATOM | 1626 | OG1 | THR | 205 | 124.430 | 11.425 | 55.362 | 1.00117.43 | 1SG1627 |
| ATOM | 1627 | CG2 | THR | 205 | 125.107 | 9.273  | 54.463 | 1.00117.43 | 1SG1628 |
| ATOM | 1628 | C   | THR | 205 | 125.645 | 10.905 | 57.818 | 1.00117.43 | 1SG1629 |
| ATOM | 1629 | O   | THR | 205 | 126.793 | 11.081 | 58.224 | 1.00117.43 | 1SG1630 |
| ATOM | 1630 | N   | THR | 206 | 124.623 | 11.701 | 58.182 | 1.00112.76 | 1SG1631 |
| ATOM | 1631 | CA  | THR | 206 | 124.840 | 12.856 | 59.004 | 1.00112.76 | 1SG1632 |

## Supplementary material 1.txt

|      |      |     |     |     |         |        |        |            |         |
|------|------|-----|-----|-----|---------|--------|--------|------------|---------|
| ATOM | 1632 | CB  | THR | 206 | 123.607 | 13.702 | 59.167 | 1.00112.76 | 1SG1633 |
| ATOM | 1633 | OG1 | THR | 206 | 123.942 | 14.921 | 59.811 | 1.00112.76 | 1SG1634 |
| ATOM | 1634 | CG2 | THR | 206 | 122.547 | 12.939 | 59.981 | 1.00112.76 | 1SG1635 |
| ATOM | 1635 | C   | THR | 206 | 125.348 | 12.489 | 60.366 | 1.00112.76 | 1SG1636 |
| ATOM | 1636 | O   | THR | 206 | 126.320 | 13.075 | 60.841 | 1.00112.76 | 1SG1637 |
| ATOM | 1637 | N   | ASN | 207 | 124.734 | 11.491 | 61.026 | 1.0079.79  | 1SG1638 |
| ATOM | 1638 | CA  | ASN | 207 | 125.119 | 11.191 | 62.375 | 1.0079.79  | 1SG1639 |
| ATOM | 1639 | CB  | ASN | 207 | 124.298 | 10.041 | 62.982 | 1.0079.79  | 1SG1640 |
| ATOM | 1640 | CG  | ASN | 207 | 122.860 | 10.521 | 63.118 | 1.0079.79  | 1SG1641 |
| ATOM | 1641 | OD1 | ASN | 207 | 121.926 | 9.723  | 63.166 | 1.0079.79  | 1SG1642 |
| ATOM | 1642 | ND2 | ASN | 207 | 122.676 | 11.867 | 63.176 | 1.0079.79  | 1SG1643 |
| ATOM | 1643 | C   | ASN | 207 | 126.552 | 10.773 | 62.396 | 1.0079.79  | 1SG1644 |
| ATOM | 1644 | O   | ASN | 207 | 127.331 | 11.241 | 63.224 | 1.0079.79  | 1SG1645 |
| ATOM | 1645 | N   | TYR | 208 | 126.931 | 9.878  | 61.470 | 1.00106.36 | 1SG1646 |
| ATOM | 1646 | CA  | TYR | 208 | 128.265 | 9.358  | 61.420 | 1.00106.36 | 1SG1647 |
| ATOM | 1647 | CB  | TYR | 208 | 128.394 | 8.146  | 60.486 | 1.00106.36 | 1SG1648 |
| ATOM | 1648 | CG  | TYR | 208 | 127.611 | 7.065  | 61.155 | 1.00106.36 | 1SG1649 |
| ATOM | 1649 | CD1 | TYR | 208 | 126.247 | 6.975  | 60.990 | 1.00106.36 | 1SG1650 |
| ATOM | 1650 | CD2 | TYR | 208 | 128.238 | 6.147  | 61.965 | 1.00106.36 | 1SG1651 |
| ATOM | 1651 | CE1 | TYR | 208 | 125.526 | 5.981  | 61.611 | 1.00106.36 | 1SG1652 |
| ATOM | 1652 | CE2 | TYR | 208 | 127.524 | 5.150  | 62.590 | 1.00106.36 | 1SG1653 |
| ATOM | 1653 | CZ  | TYR | 208 | 126.165 | 5.066  | 62.413 | 1.00106.36 | 1SG1654 |
| ATOM | 1654 | OH  | TYR | 208 | 125.427 | 4.046  | 63.051 | 1.00106.36 | 1SG1655 |
| ATOM | 1655 | C   | TYR | 208 | 129.236 | 10.428 | 61.026 | 1.00106.36 | 1SG1656 |
| ATOM | 1656 | O   | TYR | 208 | 130.366 | 10.452 | 61.511 | 1.00106.36 | 1SG1657 |
| ATOM | 1657 | N   | LEU | 209 | 128.840 | 11.322 | 60.103 | 1.0052.56  | 1SG1658 |
| ATOM | 1658 | CA  | LEU | 209 | 129.742 | 12.354 | 59.680 | 1.0052.56  | 1SG1659 |
| ATOM | 1659 | CB  | LEU | 209 | 129.173 | 13.244 | 58.563 | 1.0052.56  | 1SG1660 |
| ATOM | 1660 | CG  | LEU | 209 | 129.032 | 12.526 | 57.211 | 1.0052.56  | 1SG1661 |
| ATOM | 1661 | CD2 | LEU | 209 | 130.365 | 11.883 | 56.785 | 1.0052.56  | 1SG1662 |
| ATOM | 1662 | CD1 | LEU | 209 | 128.460 | 13.469 | 56.141 | 1.0052.56  | 1SG1663 |
| ATOM | 1663 | C   | LEU | 209 | 130.035 | 13.259 | 60.828 | 1.0052.56  | 1SG1664 |
| ATOM | 1664 | O   | LEU | 209 | 131.182 | 13.645 | 61.050 | 1.0052.56  | 1SG1665 |
| ATOM | 1665 | N   | LYS | 210 | 128.994 | 13.640 | 61.589 | 1.00150.17 | 1SG1666 |
| ATOM | 1666 | CA  | LYS | 210 | 129.240 | 14.548 | 62.663 | 1.00150.17 | 1SG1667 |
| ATOM | 1667 | CB  | LYS | 210 | 127.961 | 14.971 | 63.403 | 1.00150.17 | 1SG1668 |
| ATOM | 1668 | CG  | LYS | 210 | 128.240 | 15.809 | 64.654 | 1.00150.17 | 1SG1669 |
| ATOM | 1669 | CD  | LYS | 210 | 128.967 | 17.125 | 64.371 | 1.00150.17 | 1SG1670 |
| ATOM | 1670 | CE  | LYS | 210 | 128.178 | 18.093 | 63.491 | 1.00150.17 | 1SG1671 |
| ATOM | 1671 | NZ  | LYS | 210 | 128.969 | 19.325 | 63.274 | 1.00150.17 | 1SG1672 |
| ATOM | 1672 | C   | LYS | 210 | 130.145 | 13.911 | 63.653 | 1.00150.17 | 1SG1673 |
| ATOM | 1673 | O   | LYS | 210 | 131.180 | 14.471 | 64.008 | 1.00150.17 | 1SG1674 |
| ATOM | 1674 | N   | LYS | 211 | 129.794 | 12.708 | 64.136 | 1.0097.22  | 1SG1675 |
| ATOM | 1675 | CA  | LYS | 211 | 130.683 | 12.199 | 65.125 | 1.0097.22  | 1SG1676 |
| ATOM | 1676 | CB  | LYS | 211 | 130.149 | 10.932 | 65.828 | 1.0097.22  | 1SG1677 |
| ATOM | 1677 | CG  | LYS | 211 | 129.865 | 9.736  | 64.916 | 1.0097.22  | 1SG1678 |
| ATOM | 1678 | CD  | LYS | 211 | 129.606 | 8.443  | 65.690 | 1.0097.22  | 1SG1679 |
| ATOM | 1679 | CE  | LYS | 211 | 129.316 | 7.234  | 64.801 | 1.0097.22  | 1SG1680 |
| ATOM | 1680 | NZ  | LYS | 211 | 129.030 | 6.053  | 65.645 | 1.0097.22  | 1SG1681 |
| ATOM | 1681 | C   | LYS | 211 | 132.008 | 11.902 | 64.506 | 1.0097.22  | 1SG1682 |
| ATOM | 1682 | O   | LYS | 211 | 133.002 | 12.544 | 64.828 | 1.0097.22  | 1SG1683 |
| ATOM | 1683 | N   | VAL | 212 | 132.033 | 10.932 | 63.573 | 1.00110.24 | 1SG1684 |
| ATOM | 1684 | CA  | VAL | 212 | 133.233 | 10.457 | 62.951 | 1.00110.24 | 1SG1685 |
| ATOM | 1685 | CB  | VAL | 212 | 133.021 | 9.113  | 62.317 | 1.00110.24 | 1SG1686 |
| ATOM | 1686 | CG1 | VAL | 212 | 134.308 | 8.692  | 61.589 | 1.00110.24 | 1SG1687 |
| ATOM | 1687 | CG2 | VAL | 212 | 132.563 | 8.128  | 63.406 | 1.00110.24 | 1SG1688 |
| ATOM | 1688 | C   | VAL | 212 | 133.781 | 11.348 | 61.896 | 1.00110.24 | 1SG1689 |
| ATOM | 1689 | O   | VAL | 212 | 134.935 | 11.764 | 61.986 | 1.00110.24 | 1SG1690 |
| ATOM | 1690 | N   | LEU | 213 | 132.943 | 11.714 | 60.905 | 1.00230.66 | 1SG1691 |
| ATOM | 1691 | CA  | LEU | 213 | 133.468 | 12.333 | 59.722 | 1.00230.66 | 1SG1692 |
| ATOM | 1692 | CB  | LEU | 213 | 134.060 | 13.739 | 59.920 | 1.00230.66 | 1SG1693 |
| ATOM | 1693 | CG  | LEU | 213 | 134.386 | 14.531 | 58.629 | 1.00230.66 | 1SG1694 |
| ATOM | 1694 | CD2 | LEU | 213 | 135.239 | 13.747 | 57.616 | 1.00230.66 | 1SG1695 |
| ATOM | 1695 | CD1 | LEU | 213 | 135.000 | 15.895 | 58.979 | 1.00230.66 | 1SG1696 |
| ATOM | 1696 | C   | LEU | 213 | 134.558 | 11.395 | 59.314 | 1.00230.66 | 1SG1697 |
| ATOM | 1697 | O   | LEU | 213 | 134.281 | 10.302 | 58.825 | 1.00230.66 | 1SG1698 |
| ATOM | 1698 | N   | ALA | 214 | 135.825 | 11.799 | 59.535 | 1.00239.86 | 1SG1699 |
| ATOM | 1699 | CA  | ALA | 214 | 136.951 | 10.967 | 59.252 | 1.00239.86 | 1SG1700 |
| ATOM | 1700 | CB  | ALA | 214 | 137.954 | 11.589 | 58.265 | 1.00239.86 | 1SG1701 |
| ATOM | 1701 | C   | ALA | 214 | 137.659 | 10.784 | 60.550 | 1.00239.86 | 1SG1702 |
| ATOM | 1702 | O   | ALA | 214 | 137.620 | 11.655 | 61.416 | 1.00239.86 | 1SG1703 |



## Supplementary material 1.txt

|      |      |     |     |     |         |        |        |            |       |         |
|------|------|-----|-----|-----|---------|--------|--------|------------|-------|---------|
| ATOM | 1703 | N   | GLY | 215 | 138.304 | 9.623  | 60.742 | 1.00       | 89.05 | 1SG1704 |
| ATOM | 1704 | CA  | GLY | 215 | 138.995 | 9.430  | 61.979 | 1.00       | 89.05 | 1SG1705 |
| ATOM | 1705 | C   | GLY | 215 | 137.952 | 9.241  | 63.026 | 1.00       | 89.05 | 1SG1706 |
| ATOM | 1706 | O   | GLY | 215 | 136.795 | 8.953  | 62.722 | 1.00       | 89.05 | 1SG1707 |
| ATOM | 1707 | N   | ARG | 216 | 138.345 | 9.394  | 64.303 | 1.00170.94 |       | 1SG1708 |
| ATOM | 1708 | CA  | ARG | 216 | 137.403 | 9.212  | 65.365 | 1.00170.94 |       | 1SG1709 |
| ATOM | 1709 | CB  | ARG | 216 | 138.039 | 9.230  | 66.768 | 1.00170.94 |       | 1SG1710 |
| ATOM | 1710 | CG  | ARG | 216 | 138.801 | 10.508 | 67.116 | 1.00170.94 |       | 1SG1711 |
| ATOM | 1711 | CD  | ARG | 216 | 140.248 | 10.487 | 66.621 | 1.00170.94 |       | 1SG1712 |
| ATOM | 1712 | NE  | ARG | 216 | 140.960 | 11.643 | 67.235 | 1.00170.94 |       | 1SG1713 |
| ATOM | 1713 | CZ  | ARG | 216 | 141.550 | 11.502 | 68.457 | 1.00170.94 |       | 1SG1714 |
| ATOM | 1714 | NH1 | ARG | 216 | 141.473 | 10.310 | 69.119 | 1.00170.94 |       | 1SG1715 |
| ATOM | 1715 | NH2 | ARG | 216 | 142.220 | 12.552 | 69.017 | 1.00170.94 |       | 1SG1716 |
| ATOM | 1716 | C   | ARG | 216 | 136.354 | 10.275 | 65.302 | 1.00170.94 |       | 1SG1717 |
| ATOM | 1717 | O   | ARG | 216 | 135.172 | 9.988  | 65.486 | 1.00170.94 |       | 1SG1718 |
| ATOM | 1718 | N   | GLU | 217 | 136.740 | 11.537 | 65.026 | 1.00217.11 |       | 1SG1719 |
| ATOM | 1719 | CA  | GLU | 217 | 135.718 | 12.542 | 65.051 | 1.00217.11 |       | 1SG1720 |
| ATOM | 1720 | CB  | GLU | 217 | 135.779 | 13.421 | 66.303 | 1.00217.11 |       | 1SG1721 |
| ATOM | 1721 | CG  | GLU | 217 | 135.472 | 12.671 | 67.597 | 1.00217.11 |       | 1SG1722 |
| ATOM | 1722 | CD  | GLU | 217 | 135.756 | 13.621 | 68.749 | 1.00217.11 |       | 1SG1723 |
| ATOM | 1723 | OE1 | GLU | 217 | 136.956 | 13.927 | 68.982 | 1.00217.11 |       | 1SG1724 |
| ATOM | 1724 | OE2 | GLU | 217 | 134.776 | 14.052 | 69.413 | 1.00217.11 |       | 1SG1725 |
| ATOM | 1725 | C   | GLU | 217 | 135.854 | 13.470 | 63.888 | 1.00217.11 |       | 1SG1726 |
| ATOM | 1726 | O   | GLU | 217 | 136.942 | 13.648 | 63.351 | 1.00217.11 |       | 1SG1727 |
| ATOM | 1727 | N   | ALA | 218 | 134.720 | 14.067 | 63.446 | 1.00       | 88.77 | 1SG1728 |
| ATOM | 1728 | CA  | ALA | 218 | 134.804 | 15.063 | 62.423 | 1.00       | 88.77 | 1SG1729 |
| ATOM | 1729 | CB  | ALA | 218 | 133.453 | 15.720 | 62.098 | 1.00       | 88.77 | 1SG1730 |
| ATOM | 1730 | C   | ALA | 218 | 135.680 | 16.093 | 63.050 | 1.00       | 88.77 | 1SG1731 |
| ATOM | 1731 | O   | ALA | 218 | 136.522 | 16.704 | 62.395 | 1.00       | 88.77 | 1SG1732 |
| ATOM | 1732 | N   | THR | 219 | 135.517 | 16.278 | 64.373 | 1.00116.56 |       | 1SG1733 |
| ATOM | 1733 | CA  | THR | 219 | 136.313 | 17.244 | 65.062 | 1.00116.56 |       | 1SG1734 |
| ATOM | 1734 | CB  | THR | 219 | 136.004 | 17.361 | 66.529 | 1.00116.56 |       | 1SG1735 |
| ATOM | 1735 | OG1 | THR | 219 | 136.634 | 18.516 | 67.064 | 1.00116.56 |       | 1SG1736 |
| ATOM | 1736 | CG2 | THR | 219 | 136.503 | 16.108 | 67.264 | 1.00116.56 |       | 1SG1737 |
| ATOM | 1737 | C   | THR | 219 | 137.744 | 16.849 | 64.902 | 1.00116.56 |       | 1SG1738 |
| ATOM | 1738 | O   | THR | 219 | 138.607 | 17.706 | 64.718 | 1.00116.56 |       | 1SG1739 |
| ATOM | 1739 | N   | HIS | 220 | 138.058 | 15.540 | 64.978 | 1.00148.27 |       | 1SG1740 |
| ATOM | 1740 | CA  | HIS | 220 | 139.436 | 15.223 | 64.761 | 1.00148.27 |       | 1SG1741 |
| ATOM | 1741 | ND1 | HIS | 220 | 139.571 | 14.867 | 68.362 | 1.00148.27 |       | 1SG1742 |
| ATOM | 1742 | CG  | HIS | 220 | 140.143 | 15.249 | 67.169 | 1.00148.27 |       | 1SG1743 |
| ATOM | 1743 | CB  | HIS | 220 | 140.095 | 14.437 | 65.908 | 1.00148.27 |       | 1SG1744 |
| ATOM | 1744 | NE2 | HIS | 220 | 140.480 | 16.868 | 68.706 | 1.00148.27 |       | 1SG1745 |
| ATOM | 1745 | CD2 | HIS | 220 | 140.693 | 16.474 | 67.398 | 1.00148.27 |       | 1SG1746 |
| ATOM | 1746 | CE1 | HIS | 220 | 139.803 | 15.871 | 69.246 | 1.00148.27 |       | 1SG1747 |
| ATOM | 1747 | C   | HIS | 220 | 139.557 | 14.445 | 63.491 | 1.00148.27 |       | 1SG1748 |
| ATOM | 1748 | O   | HIS | 220 | 139.631 | 13.218 | 63.493 | 1.00148.27 |       | 1SG1749 |
| ATOM | 1749 | N   | VAL | 221 | 139.575 | 15.180 | 62.363 | 1.00       | 79.73 | 1SG1750 |
| ATOM | 1750 | CA  | VAL | 221 | 139.749 | 14.637 | 61.046 | 1.00       | 79.73 | 1SG1751 |
| ATOM | 1751 | CB  | VAL | 221 | 138.592 | 14.898 | 60.117 | 1.00       | 79.73 | 1SG1752 |
| ATOM | 1752 | CG1 | VAL | 221 | 138.935 | 14.341 | 58.726 | 1.00       | 79.73 | 1SG1753 |
| ATOM | 1753 | CG2 | VAL | 221 | 137.315 | 14.295 | 60.718 | 1.00       | 79.73 | 1SG1754 |
| ATOM | 1754 | C   | VAL | 221 | 140.909 | 15.413 | 60.510 | 1.00       | 79.73 | 1SG1755 |
| ATOM | 1755 | O   | VAL | 221 | 141.218 | 16.486 | 61.026 | 1.00       | 79.73 | 1SG1756 |
| ATOM | 1756 | N   | ASP | 222 | 141.599 | 14.894 | 59.478 | 1.00       | 81.33 | 1SG1757 |
| ATOM | 1757 | CA  | ASP | 222 | 142.731 | 15.606 | 58.961 | 1.00       | 81.33 | 1SG1758 |
| ATOM | 1758 | CB  | ASP | 222 | 143.544 | 14.809 | 57.927 | 1.00       | 81.33 | 1SG1759 |
| ATOM | 1759 | CG  | ASP | 222 | 142.657 | 14.536 | 56.721 | 1.00       | 81.33 | 1SG1760 |
| ATOM | 1760 | OD1 | ASP | 222 | 141.465 | 14.180 | 56.923 | 1.00       | 81.33 | 1SG1761 |
| ATOM | 1761 | OD2 | ASP | 222 | 143.168 | 14.670 | 55.577 | 1.00       | 81.33 | 1SG1762 |
| ATOM | 1762 | C   | ASP | 222 | 142.236 | 16.851 | 58.300 | 1.00       | 81.33 | 1SG1763 |
| ATOM | 1763 | O   | ASP | 222 | 141.083 | 16.927 | 57.878 | 1.00       | 81.33 | 1SG1764 |
| ATOM | 1764 | N   | GLU | 223 | 143.111 | 17.875 | 58.215 | 1.00118.95 |       | 1SG1765 |
| ATOM | 1765 | CA  | GLU | 223 | 142.730 | 19.128 | 57.632 | 1.00118.95 |       | 1SG1766 |
| ATOM | 1766 | CB  | GLU | 223 | 143.720 | 20.268 | 57.901 | 1.00118.95 |       | 1SG1767 |
| ATOM | 1767 | CG  | GLU | 223 | 143.815 | 20.638 | 59.382 | 1.00118.95 |       | 1SG1768 |
| ATOM | 1768 | CD  | GLU | 223 | 142.448 | 21.132 | 59.839 | 1.00118.95 |       | 1SG1769 |
| ATOM | 1769 | OE1 | GLU | 223 | 141.469 | 20.344 | 59.747 | 1.00118.95 |       | 1SG1770 |
| ATOM | 1770 | OE2 | GLU | 223 | 142.366 | 22.307 | 60.288 | 1.00118.95 |       | 1SG1771 |
| ATOM | 1771 | C   | GLU | 223 | 142.626 | 18.945 | 56.166 | 1.00118.95 |       | 1SG1772 |
| ATOM | 1772 | O   | GLU | 223 | 143.443 | 18.251 | 55.556 | 1.00118.95 |       | 1SG1773 |
| ATOM | 1773 | N   | SER | 224 | 141.596 | 19.616 | 55.613 | 1.00247.51 |       | 1SG1774 |

## Supplementary material 1.txt

|      |      |     |     |     |         |        |        |            |         |
|------|------|-----|-----|-----|---------|--------|--------|------------|---------|
| ATOM | 1774 | CA  | SER | 224 | 141.086 | 19.507 | 54.290 | 1.00247.51 | 1SG1775 |
| ATOM | 1775 | CB  | SER | 224 | 141.885 | 18.592 | 53.343 | 1.00247.51 | 1SG1776 |
| ATOM | 1776 | OG  | SER | 224 | 143.180 | 19.132 | 53.122 | 1.00247.51 | 1SG1777 |
| ATOM | 1777 | C   | SER | 224 | 139.736 | 18.900 | 54.491 | 1.00247.51 | 1SG1778 |
| ATOM | 1778 | O   | SER | 224 | 138.704 | 19.568 | 54.487 | 1.00247.51 | 1SG1779 |
| ATOM | 1779 | N   | LEU | 225 | 139.743 | 17.581 | 54.734 | 1.00 85.86 | 1SG1780 |
| ATOM | 1780 | CA  | LEU | 225 | 138.562 | 16.788 | 54.859 | 1.00 85.86 | 1SG1781 |
| ATOM | 1781 | CB  | LEU | 225 | 138.898 | 15.307 | 55.085 | 1.00 85.86 | 1SG1782 |
| ATOM | 1782 | CG  | LEU | 225 | 137.662 | 14.407 | 55.228 | 1.00 85.86 | 1SG1783 |
| ATOM | 1783 | CD2 | LEU | 225 | 138.065 | 12.993 | 55.672 | 1.00 85.86 | 1SG1784 |
| ATOM | 1784 | CD1 | LEU | 225 | 136.825 | 14.402 | 53.938 | 1.00 85.86 | 1SG1785 |
| ATOM | 1785 | C   | LEU | 225 | 137.704 | 17.256 | 56.000 | 1.00 85.86 | 1SG1786 |
| ATOM | 1786 | O   | LEU | 225 | 136.479 | 17.266 | 55.889 | 1.00 85.86 | 1SG1787 |
| ATOM | 1787 | N   | LEU | 226 | 138.309 | 17.667 | 57.127 | 1.00 56.00 | 1SG1788 |
| ATOM | 1788 | CA  | LEU | 226 | 137.537 | 18.043 | 58.280 | 1.00 56.00 | 1SG1789 |
| ATOM | 1789 | CB  | LEU | 226 | 138.458 | 18.476 | 59.445 | 1.00 56.00 | 1SG1790 |
| ATOM | 1790 | CG  | LEU | 226 | 137.809 | 18.799 | 60.814 | 1.00 56.00 | 1SG1791 |
| ATOM | 1791 | CD2 | LEU | 226 | 136.740 | 19.904 | 60.750 | 1.00 56.00 | 1SG1792 |
| ATOM | 1792 | CD1 | LEU | 226 | 138.899 | 19.158 | 61.838 | 1.00 56.00 | 1SG1793 |
| ATOM | 1793 | C   | LEU | 226 | 136.647 | 19.192 | 57.909 | 1.00 56.00 | 1SG1794 |
| ATOM | 1794 | O   | LEU | 226 | 135.465 | 19.197 | 58.255 | 1.00 56.00 | 1SG1795 |
| ATOM | 1795 | N   | GLY | 227 | 137.204 | 20.198 | 57.205 | 1.00 35.69 | 1SG1796 |
| ATOM | 1796 | CA  | GLY | 227 | 136.473 | 21.377 | 56.836 | 1.00 35.69 | 1SG1797 |
| ATOM | 1797 | C   | GLY | 227 | 135.388 | 21.043 | 55.864 | 1.00 35.69 | 1SG1798 |
| ATOM | 1798 | O   | GLY | 227 | 134.276 | 21.565 | 55.952 | 1.00 35.69 | 1SG1799 |
| ATOM | 1799 | N   | GLU | 228 | 135.692 | 20.158 | 54.899 | 1.00 57.19 | 1SG1800 |
| ATOM | 1800 | CA  | GLU | 228 | 134.752 | 19.829 | 53.869 | 1.00 57.19 | 1SG1801 |
| ATOM | 1801 | CB  | GLU | 228 | 135.342 | 18.822 | 52.865 | 1.00 57.19 | 1SG1802 |
| ATOM | 1802 | CG  | GLU | 228 | 134.405 | 18.441 | 51.718 | 1.00 57.19 | 1SG1803 |
| ATOM | 1803 | CD  | GLU | 228 | 135.154 | 17.469 | 50.812 | 1.00 57.19 | 1SG1804 |
| ATOM | 1804 | OE1 | GLU | 228 | 135.613 | 16.414 | 51.326 | 1.00 57.19 | 1SG1805 |
| ATOM | 1805 | OE2 | GLU | 228 | 135.275 | 17.768 | 49.594 | 1.00 57.19 | 1SG1806 |
| ATOM | 1806 | C   | GLU | 228 | 133.534 | 19.216 | 54.490 | 1.00 57.19 | 1SG1807 |
| ATOM | 1807 | O   | GLU | 228 | 132.404 | 19.544 | 54.128 | 1.00 57.19 | 1SG1808 |
| ATOM | 1808 | N   | VAL | 229 | 133.732 | 18.293 | 55.445 | 1.00 58.35 | 1SG1809 |
| ATOM | 1809 | CA  | VAL | 229 | 132.610 | 17.649 | 56.064 | 1.00 58.35 | 1SG1810 |
| ATOM | 1810 | CB  | VAL | 229 | 132.997 | 16.466 | 56.890 | 1.00 58.35 | 1SG1811 |
| ATOM | 1811 | CG1 | VAL | 229 | 131.778 | 15.979 | 57.693 | 1.00 58.35 | 1SG1812 |
| ATOM | 1812 | CG2 | VAL | 229 | 133.532 | 15.414 | 55.906 | 1.00 58.35 | 1SG1813 |
| ATOM | 1813 | C   | VAL | 229 | 131.831 | 18.612 | 56.900 | 1.00 58.35 | 1SG1814 |
| ATOM | 1814 | O   | VAL | 229 | 130.604 | 18.631 | 56.840 | 1.00 58.35 | 1SG1815 |
| ATOM | 1815 | N   | LYS | 230 | 132.509 | 19.462 | 57.689 | 1.00 81.41 | 1SG1816 |
| ATOM | 1816 | CA  | LYS | 230 | 131.750 | 20.333 | 58.536 | 1.00 81.41 | 1SG1817 |
| ATOM | 1817 | CB  | LYS | 230 | 132.586 | 21.186 | 59.506 | 1.00 81.41 | 1SG1818 |
| ATOM | 1818 | CG  | LYS | 230 | 133.230 | 20.367 | 60.627 | 1.00 81.41 | 1SG1819 |
| ATOM | 1819 | CD  | LYS | 230 | 134.068 | 21.202 | 61.594 | 1.00 81.41 | 1SG1820 |
| ATOM | 1820 | CE  | LYS | 230 | 134.951 | 22.248 | 60.915 | 1.00 81.41 | 1SG1821 |
| ATOM | 1821 | NZ  | LYS | 230 | 135.522 | 23.156 | 61.934 | 1.00 81.41 | 1SG1822 |
| ATOM | 1822 | C   | LYS | 230 | 130.931 | 21.246 | 57.685 | 1.00 81.41 | 1SG1823 |
| ATOM | 1823 | O   | LYS | 230 | 129.782 | 21.537 | 58.017 | 1.00 81.41 | 1SG1824 |
| ATOM | 1824 | N   | TYR | 231 | 131.494 | 21.723 | 56.561 | 1.00 42.15 | 1SG1825 |
| ATOM | 1825 | CA  | TYR | 231 | 130.778 | 22.630 | 55.713 | 1.00 42.15 | 1SG1826 |
| ATOM | 1826 | CB  | TYR | 231 | 131.626 | 23.186 | 54.556 | 1.00 42.15 | 1SG1827 |
| ATOM | 1827 | CG  | TYR | 231 | 130.779 | 24.177 | 53.829 | 1.00 42.15 | 1SG1828 |
| ATOM | 1828 | CD1 | TYR | 231 | 130.651 | 25.463 | 54.302 | 1.00 42.15 | 1SG1829 |
| ATOM | 1829 | CD2 | TYR | 231 | 130.112 | 23.823 | 52.679 | 1.00 42.15 | 1SG1830 |
| ATOM | 1830 | CE1 | TYR | 231 | 129.873 | 26.384 | 53.640 | 1.00 42.15 | 1SG1831 |
| ATOM | 1831 | CE2 | TYR | 231 | 129.332 | 24.740 | 52.012 | 1.00 42.15 | 1SG1832 |
| ATOM | 1832 | CZ  | TYR | 231 | 129.210 | 26.021 | 52.492 | 1.00 42.15 | 1SG1833 |
| ATOM | 1833 | OH  | TYR | 231 | 128.409 | 26.961 | 51.808 | 1.00 42.15 | 1SG1834 |
| ATOM | 1834 | C   | TYR | 231 | 129.589 | 21.931 | 55.121 | 1.00 42.15 | 1SG1835 |
| ATOM | 1835 | O   | TYR | 231 | 128.511 | 22.512 | 55.017 | 1.00 42.15 | 1SG1836 |
| ATOM | 1836 | N   | ALA | 232 | 129.756 | 20.656 | 54.716 | 1.00 33.88 | 1SG1837 |
| ATOM | 1837 | CA  | ALA | 232 | 128.706 | 19.917 | 54.068 | 1.00 33.88 | 1SG1838 |
| ATOM | 1838 | CB  | ALA | 232 | 129.143 | 18.495 | 53.677 | 1.00 33.88 | 1SG1839 |
| ATOM | 1839 | C   | ALA | 232 | 127.529 | 19.787 | 54.981 | 1.00 33.88 | 1SG1840 |
| ATOM | 1840 | O   | ALA | 232 | 126.388 | 19.940 | 54.550 | 1.00 33.88 | 1SG1841 |
| ATOM | 1841 | N   | LEU | 233 | 127.764 | 19.506 | 56.275 | 1.00102.39 | 1SG1842 |
| ATOM | 1842 | CA  | LEU | 233 | 126.645 | 19.363 | 57.156 | 1.00102.39 | 1SG1843 |
| ATOM | 1843 | CB  | LEU | 233 | 127.012 | 18.891 | 58.571 | 1.00102.39 | 1SG1844 |
| ATOM | 1844 | CG  | LEU | 233 | 127.341 | 17.385 | 58.608 | 1.00102.39 | 1SG1845 |

## Supplementary material 1.txt

|      |      |     |     |     |         |        |        |            |         |
|------|------|-----|-----|-----|---------|--------|--------|------------|---------|
| ATOM | 1845 | CD2 | LEU | 233 | 127.478 | 16.872 | 60.047 | 1.00102.39 | 1SG1846 |
| ATOM | 1846 | CD1 | LEU | 233 | 128.555 | 17.046 | 57.736 | 1.00102.39 | 1SG1847 |
| ATOM | 1847 | C   | LEU | 233 | 125.916 | 20.665 | 57.225 | 1.00102.39 | 1SG1848 |
| ATOM | 1848 | O   | LEU | 233 | 124.692 | 20.684 | 57.342 | 1.00102.39 | 1SG1849 |
| ATOM | 1849 | N   | GLU | 234 | 126.655 | 21.789 | 57.204 | 1.0044.04  | 1SG1850 |
| ATOM | 1850 | CA  | GLU | 234 | 126.032 | 23.082 | 57.234 | 1.0044.04  | 1SG1851 |
| ATOM | 1851 | CB  | GLU | 234 | 127.048 | 24.212 | 57.464 | 1.0044.04  | 1SG1852 |
| ATOM | 1852 | CG  | GLU | 234 | 127.714 | 24.132 | 58.838 | 1.0044.04  | 1SG1853 |
| ATOM | 1853 | CD  | GLU | 234 | 128.693 | 25.291 | 58.957 | 1.0044.04  | 1SG1854 |
| ATOM | 1854 | OE1 | GLU | 234 | 128.715 | 26.140 | 58.026 | 1.0044.04  | 1SG1855 |
| ATOM | 1855 | OE2 | GLU | 234 | 129.429 | 25.344 | 59.978 | 1.0044.04  | 1SG1856 |
| ATOM | 1856 | C   | GLU | 234 | 125.318 | 23.351 | 55.938 | 1.0044.04  | 1SG1857 |
| ATOM | 1857 | O   | GLU | 234 | 124.181 | 23.827 | 55.946 | 1.0044.04  | 1SG1858 |
| ATOM | 1858 | N   | PHE | 235 | 125.961 | 23.060 | 54.784 | 1.0068.11  | 1SG1859 |
| ATOM | 1859 | CA  | PHE | 235 | 125.318 | 23.343 | 53.528 | 1.0068.11  | 1SG1860 |
| ATOM | 1860 | CB  | PHE | 235 | 125.807 | 24.654 | 52.890 | 1.0068.11  | 1SG1861 |
| ATOM | 1861 | CG  | PHE | 235 | 125.619 | 25.756 | 53.874 | 1.0068.11  | 1SG1862 |
| ATOM | 1862 | CD1 | PHE | 235 | 126.547 | 25.948 | 54.872 | 1.0068.11  | 1SG1863 |
| ATOM | 1863 | CD2 | PHE | 235 | 124.537 | 26.602 | 53.799 | 1.0068.11  | 1SG1864 |
| ATOM | 1864 | CE1 | PHE | 235 | 126.395 | 26.960 | 55.789 | 1.0068.11  | 1SG1865 |
| ATOM | 1865 | CE2 | PHE | 235 | 124.380 | 27.617 | 54.714 | 1.0068.11  | 1SG1866 |
| ATOM | 1866 | CZ  | PHE | 235 | 125.310 | 27.799 | 55.710 | 1.0068.11  | 1SG1867 |
| ATOM | 1867 | C   | PHE | 235 | 125.688 | 22.270 | 52.543 | 1.0068.11  | 1SG1868 |
| ATOM | 1868 | O   | PHE | 235 | 126.866 | 22.029 | 52.289 | 1.0068.11  | 1SG1869 |
| ATOM | 1869 | N   | PRO | 236 | 124.702 | 21.633 | 51.966 | 1.00148.11 | 1SG1870 |
| ATOM | 1870 | CA  | PRO | 236 | 124.981 | 20.642 | 50.958 | 1.00148.11 | 1SG1871 |
| ATOM | 1871 | CD  | PRO | 236 | 123.534 | 21.274 | 52.758 | 1.00148.11 | 1SG1872 |
| ATOM | 1872 | CB  | PRO | 236 | 123.746 | 19.747 | 50.888 | 1.00148.11 | 1SG1873 |
| ATOM | 1873 | CG  | PRO | 236 | 123.132 | 19.866 | 52.292 | 1.00148.11 | 1SG1874 |
| ATOM | 1874 | C   | PRO | 236 | 125.300 | 21.310 | 49.655 | 1.00148.11 | 1SG1875 |
| ATOM | 1875 | O   | PRO | 236 | 124.950 | 22.475 | 49.481 | 1.00148.11 | 1SG1876 |
| ATOM | 1876 | N   | TRP | 237 | 125.972 | 20.592 | 48.735 | 1.00100.97 | 1SG1877 |
| ATOM | 1877 | CA  | TRP | 237 | 126.370 | 21.111 | 47.455 | 1.00100.97 | 1SG1878 |
| ATOM | 1878 | CB  | TRP | 237 | 127.238 | 20.107 | 46.677 | 1.00100.97 | 1SG1879 |
| ATOM | 1879 | CG  | TRP | 237 | 127.651 | 20.567 | 45.300 | 1.00100.97 | 1SG1880 |
| ATOM | 1880 | CD2 | TRP | 237 | 128.782 | 21.410 | 45.032 | 1.00100.97 | 1SG1881 |
| ATOM | 1881 | CD1 | TRP | 237 | 127.072 | 20.299 | 44.095 | 1.00100.97 | 1SG1882 |
| ATOM | 1882 | NE1 | TRP | 237 | 127.775 | 20.917 | 43.089 | 1.00100.97 | 1SG1883 |
| ATOM | 1883 | CE2 | TRP | 237 | 128.829 | 21.606 | 43.651 | 1.00100.97 | 1SG1884 |
| ATOM | 1884 | CE3 | TRP | 237 | 129.704 | 21.974 | 45.865 | 1.00100.97 | 1SG1885 |
| ATOM | 1885 | CZ2 | TRP | 237 | 129.806 | 22.373 | 43.082 | 1.00100.97 | 1SG1886 |
| ATOM | 1886 | CZ3 | TRP | 237 | 130.688 | 22.746 | 45.287 | 1.00100.97 | 1SG1887 |
| ATOM | 1887 | CH2 | TRP | 237 | 130.737 | 22.941 | 43.923 | 1.00100.97 | 1SG1888 |
| ATOM | 1888 | C   | TRP | 237 | 125.182 | 21.427 | 46.594 | 1.00100.97 | 1SG1889 |
| ATOM | 1889 | O   | TRP | 237 | 125.127 | 22.486 | 45.968 | 1.00100.97 | 1SG1890 |
| ATOM | 1890 | N   | HIS | 238 | 124.195 | 20.512 | 46.545 | 1.0062.60  | 1SG1891 |
| ATOM | 1891 | CA  | HIS | 238 | 123.080 | 20.626 | 45.645 | 1.0062.60  | 1SG1892 |
| ATOM | 1892 | ND1 | HIS | 238 | 121.249 | 19.304 | 43.331 | 1.0062.60  | 1SG1893 |
| ATOM | 1893 | CG  | HIS | 238 | 121.048 | 19.439 | 44.686 | 1.0062.60  | 1SG1894 |
| ATOM | 1894 | CB  | HIS | 238 | 122.154 | 19.396 | 45.699 | 1.0062.60  | 1SG1895 |
| ATOM | 1895 | NE2 | HIS | 238 | 119.059 | 19.555 | 43.625 | 1.0062.60  | 1SG1896 |
| ATOM | 1896 | CD2 | HIS | 238 | 119.704 | 19.593 | 44.848 | 1.0062.60  | 1SG1897 |
| ATOM | 1897 | CE1 | HIS | 238 | 120.028 | 19.381 | 42.744 | 1.0062.60  | 1SG1898 |
| ATOM | 1898 | C   | HIS | 238 | 122.245 | 21.839 | 45.925 | 1.0062.60  | 1SG1899 |
| ATOM | 1899 | O   | HIS | 238 | 121.856 | 22.544 | 44.994 | 1.0062.60  | 1SG1900 |
| ATOM | 1900 | N   | CYS | 239 | 121.940 | 22.130 | 47.204 | 1.00136.86 | 1SG1901 |
| ATOM | 1901 | CA  | CYS | 239 | 121.055 | 23.236 | 47.442 | 1.00136.86 | 1SG1902 |
| ATOM | 1902 | CB  | CYS | 239 | 120.058 | 22.958 | 48.579 | 1.00136.86 | 1SG1903 |
| ATOM | 1903 | SG  | CYS | 239 | 120.887 | 22.555 | 50.145 | 1.00136.86 | 1SG1904 |
| ATOM | 1904 | C   | CYS | 239 | 121.821 | 24.473 | 47.805 | 1.00136.86 | 1SG1905 |
| ATOM | 1905 | O   | CYS | 239 | 121.297 | 25.347 | 48.497 | 1.00136.86 | 1SG1906 |
| ATOM | 1906 | N   | SER | 240 | 123.060 | 24.621 | 47.298 | 1.0094.34  | 1SG1907 |
| ATOM | 1907 | CA  | SER | 240 | 123.814 | 25.797 | 47.632 | 1.0094.34  | 1SG1908 |
| ATOM | 1908 | CB  | SER | 240 | 125.190 | 25.512 | 48.245 | 1.0094.34  | 1SG1909 |
| ATOM | 1909 | OG  | SER | 240 | 125.041 | 25.048 | 49.578 | 1.0094.34  | 1SG1910 |
| ATOM | 1910 | C   | SER | 240 | 124.059 | 26.587 | 46.386 | 1.0094.34  | 1SG1911 |
| ATOM | 1911 | O   | SER | 240 | 123.879 | 26.092 | 45.276 | 1.0094.34  | 1SG1912 |
| ATOM | 1912 | N   | VAL | 241 | 124.457 | 27.867 | 46.556 | 1.0049.91  | 1SG1913 |
| ATOM | 1913 | CA  | VAL | 241 | 124.731 | 28.727 | 45.436 | 1.0049.91  | 1SG1914 |
| ATOM | 1914 | CB  | VAL | 241 | 124.772 | 30.183 | 45.803 | 1.0049.91  | 1SG1915 |
| ATOM | 1915 | CG1 | VAL | 241 | 125.157 | 30.998 | 44.558 | 1.0049.91  | 1SG1916 |

## Supplementary material 1.txt

|      |      |     |     |     |         |        |        |      |        |         |
|------|------|-----|-----|-----|---------|--------|--------|------|--------|---------|
| ATOM | 1916 | CG2 | VAL | 241 | 123.408 | 30.570 | 46.399 | 1.00 | 49.91  | 1SG1917 |
| ATOM | 1917 | C   | VAL | 241 | 126.072 | 28.348 | 44.870 | 1.00 | 49.91  | 1SG1918 |
| ATOM | 1918 | O   | VAL | 241 | 127.034 | 28.127 | 45.602 | 1.00 | 49.91  | 1SG1919 |
| ATOM | 1919 | N   | GLN | 242 | 126.171 | 28.303 | 43.526 | 1.00 | 60.63  | 1SG1920 |
| ATOM | 1920 | CA  | GLN | 242 | 127.342 | 27.821 | 42.840 | 1.00 | 60.63  | 1SG1921 |
| ATOM | 1921 | CB  | GLN | 242 | 127.167 | 27.833 | 41.313 | 1.00 | 60.63  | 1SG1922 |
| ATOM | 1922 | CG  | GLN | 242 | 126.092 | 26.872 | 40.803 | 1.00 | 60.63  | 1SG1923 |
| ATOM | 1923 | CD  | GLN | 242 | 126.026 | 27.016 | 39.289 | 1.00 | 60.63  | 1SG1924 |
| ATOM | 1924 | OE1 | GLN | 242 | 125.228 | 26.357 | 38.625 | 1.00 | 60.63  | 1SG1925 |
| ATOM | 1925 | NE2 | GLN | 242 | 126.880 | 27.913 | 38.727 | 1.00 | 60.63  | 1SG1926 |
| ATOM | 1926 | C   | GLN | 242 | 128.574 | 28.631 | 43.138 | 1.00 | 60.63  | 1SG1927 |
| ATOM | 1927 | O   | GLN | 242 | 129.618 | 28.064 | 43.453 | 1.00 | 60.63  | 1SG1928 |
| ATOM | 1928 | N   | ARG | 243 | 128.504 | 29.974 | 43.057 | 1.00 | 164.32 | 1SG1929 |
| ATOM | 1929 | CA  | ARG | 243 | 129.683 | 30.768 | 43.268 | 1.00 | 164.32 | 1SG1930 |
| ATOM | 1930 | CB  | ARG | 243 | 129.435 | 32.263 | 43.023 | 1.00 | 164.32 | 1SG1931 |
| ATOM | 1931 | CG  | ARG | 243 | 129.181 | 32.588 | 41.552 | 1.00 | 164.32 | 1SG1932 |
| ATOM | 1932 | CD  | ARG | 243 | 130.353 | 33.297 | 40.872 | 1.00 | 164.32 | 1SG1933 |
| ATOM | 1933 | NE  | ARG | 243 | 131.567 | 32.443 | 41.008 | 1.00 | 164.32 | 1SG1934 |
| ATOM | 1934 | CZ  | ARG | 243 | 131.827 | 31.456 | 40.101 | 1.00 | 164.32 | 1SG1935 |
| ATOM | 1935 | NH1 | ARG | 243 | 130.904 | 31.137 | 39.150 | 1.00 | 164.32 | 1SG1936 |
| ATOM | 1936 | NH2 | ARG | 243 | 133.022 | 30.799 | 40.134 | 1.00 | 164.32 | 1SG1937 |
| ATOM | 1937 | C   | ARG | 243 | 130.141 | 30.610 | 44.683 | 1.00 | 164.32 | 1SG1938 |
| ATOM | 1938 | O   | ARG | 243 | 131.334 | 30.455 | 44.943 | 1.00 | 164.32 | 1SG1939 |
| ATOM | 1939 | N   | TRP | 244 | 129.193 | 30.623 | 45.640 | 1.00 | 150.06 | 1SG1940 |
| ATOM | 1940 | CA  | TRP | 244 | 129.563 | 30.547 | 47.024 | 1.00 | 150.06 | 1SG1941 |
| ATOM | 1941 | CB  | TRP | 244 | 128.382 | 30.654 | 48.002 | 1.00 | 150.06 | 1SG1942 |
| ATOM | 1942 | CG  | TRP | 244 | 128.804 | 30.407 | 49.432 | 1.00 | 150.06 | 1SG1943 |
| ATOM | 1943 | CD2 | TRP | 244 | 129.569 | 31.332 | 50.221 | 1.00 | 150.06 | 1SG1944 |
| ATOM | 1944 | CD1 | TRP | 244 | 128.616 | 29.301 | 50.208 | 1.00 | 150.06 | 1SG1945 |
| ATOM | 1945 | NE1 | TRP | 244 | 129.212 | 29.480 | 51.434 | 1.00 | 150.06 | 1SG1946 |
| ATOM | 1946 | CE2 | TRP | 244 | 129.805 | 30.724 | 51.454 | 1.00 | 150.06 | 1SG1947 |
| ATOM | 1947 | CE3 | TRP | 244 | 130.044 | 32.580 | 49.938 | 1.00 | 150.06 | 1SG1948 |
| ATOM | 1948 | CZ2 | TRP | 244 | 130.523 | 31.360 | 52.427 | 1.00 | 150.06 | 1SG1949 |
| ATOM | 1949 | CZ3 | TRP | 244 | 130.761 | 33.220 | 50.924 | 1.00 | 150.06 | 1SG1950 |
| ATOM | 1950 | CH2 | TRP | 244 | 130.997 | 32.622 | 52.145 | 1.00 | 150.06 | 1SG1951 |
| ATOM | 1951 | C   | TRP | 244 | 130.257 | 29.256 | 47.306 | 1.00 | 150.06 | 1SG1952 |
| ATOM | 1952 | O   | TRP | 244 | 131.259 | 29.230 | 48.018 | 1.00 | 150.06 | 1SG1953 |
| ATOM | 1953 | N   | GLU | 245 | 129.731 | 28.141 | 46.775 | 1.00 | 83.85  | 1SG1954 |
| ATOM | 1954 | CA  | GLU | 245 | 130.336 | 26.867 | 47.031 | 1.00 | 83.85  | 1SG1955 |
| ATOM | 1955 | CB  | GLU | 245 | 129.502 | 25.696 | 46.485 | 1.00 | 83.85  | 1SG1956 |
| ATOM | 1956 | CG  | GLU | 245 | 128.163 | 25.558 | 47.211 | 1.00 | 83.85  | 1SG1957 |
| ATOM | 1957 | CD  | GLU | 245 | 128.474 | 25.371 | 48.688 | 1.00 | 83.85  | 1SG1958 |
| ATOM | 1958 | OE1 | GLU | 245 | 129.604 | 24.903 | 48.986 | 1.00 | 83.85  | 1SG1959 |
| ATOM | 1959 | OE2 | GLU | 245 | 127.599 | 25.688 | 49.537 | 1.00 | 83.85  | 1SG1960 |
| ATOM | 1960 | C   | GLU | 245 | 131.689 | 26.823 | 46.390 | 1.00 | 83.85  | 1SG1961 |
| ATOM | 1961 | O   | GLU | 245 | 132.632 | 26.267 | 46.951 | 1.00 | 83.85  | 1SG1962 |
| ATOM | 1962 | N   | ALA | 246 | 131.814 | 27.402 | 45.182 | 1.00 | 41.82  | 1SG1963 |
| ATOM | 1963 | CA  | ALA | 246 | 133.062 | 27.357 | 44.475 | 1.00 | 41.82  | 1SG1964 |
| ATOM | 1964 | CB  | ALA | 246 | 132.974 | 28.016 | 43.087 | 1.00 | 41.82  | 1SG1965 |
| ATOM | 1965 | C   | ALA | 246 | 134.111 | 28.096 | 45.246 | 1.00 | 41.82  | 1SG1966 |
| ATOM | 1966 | O   | ALA | 246 | 135.214 | 27.590 | 45.447 | 1.00 | 41.82  | 1SG1967 |
| ATOM | 1967 | N   | ARG | 247 | 133.790 | 29.306 | 45.740 | 1.00 | 106.10 | 1SG1968 |
| ATOM | 1968 | CA  | ARG | 247 | 134.812 | 30.060 | 46.402 | 1.00 | 106.10 | 1SG1969 |
| ATOM | 1969 | CB  | ARG | 247 | 134.390 | 31.482 | 46.802 | 1.00 | 106.10 | 1SG1970 |
| ATOM | 1970 | CG  | ARG | 247 | 135.498 | 32.211 | 47.561 | 1.00 | 106.10 | 1SG1971 |
| ATOM | 1971 | CD  | ARG | 247 | 135.515 | 33.723 | 47.348 | 1.00 | 106.10 | 1SG1972 |
| ATOM | 1972 | NE  | ARG | 247 | 136.435 | 34.292 | 48.372 | 1.00 | 106.10 | 1SG1973 |
| ATOM | 1973 | CZ  | ARG | 247 | 137.785 | 34.203 | 48.211 | 1.00 | 106.10 | 1SG1974 |
| ATOM | 1974 | NH1 | ARG | 247 | 138.301 | 33.525 | 47.145 | 1.00 | 106.10 | 1SG1975 |
| ATOM | 1975 | NH2 | ARG | 247 | 138.622 | 34.773 | 49.127 | 1.00 | 106.10 | 1SG1976 |
| ATOM | 1976 | C   | ARG | 247 | 135.262 | 29.326 | 47.617 | 1.00 | 106.10 | 1SG1977 |
| ATOM | 1977 | O   | ARG | 247 | 136.456 | 29.269 | 47.912 | 1.00 | 106.10 | 1SG1978 |
| ATOM | 1978 | N   | SER | 248 | 134.313 | 28.724 | 48.350 | 1.00 | 76.13  | 1SG1979 |
| ATOM | 1979 | CA  | SER | 248 | 134.680 | 28.029 | 49.541 | 1.00 | 76.13  | 1SG1980 |
| ATOM | 1980 | CB  | SER | 248 | 133.474 | 27.417 | 50.272 | 1.00 | 76.13  | 1SG1981 |
| ATOM | 1981 | OG  | SER | 248 | 133.905 | 26.743 | 51.445 | 1.00 | 76.13  | 1SG1982 |
| ATOM | 1982 | C   | SER | 248 | 135.586 | 26.911 | 49.169 | 1.00 | 76.13  | 1SG1983 |
| ATOM | 1983 | O   | SER | 248 | 136.595 | 26.699 | 49.827 | 1.00 | 76.13  | 1SG1984 |
| ATOM | 1984 | N   | PHE | 249 | 135.261 | 26.178 | 48.092 | 1.00 | 86.68  | 1SG1985 |
| ATOM | 1985 | CA  | PHE | 249 | 136.009 | 25.021 | 47.700 | 1.00 | 86.68  | 1SG1986 |
| ATOM | 1986 | CB  | PHE | 249 | 135.306 | 24.324 | 46.519 | 1.00 | 86.68  | 1SG1987 |

## Supplementary material 1.txt

|      |      |     |     |     |         |        |        |            |       |         |
|------|------|-----|-----|-----|---------|--------|--------|------------|-------|---------|
| ATOM | 1987 | CG  | PHE | 249 | 135.926 | 23.005 | 46.213 | 1.00       | 86.68 | 1SG1988 |
| ATOM | 1988 | CD1 | PHE | 249 | 135.857 | 21.972 | 47.120 | 1.00       | 86.68 | 1SG1989 |
| ATOM | 1989 | CD2 | PHE | 249 | 136.525 | 22.787 | 44.995 | 1.00       | 86.68 | 1SG1990 |
| ATOM | 1990 | CE1 | PHE | 249 | 136.413 | 20.749 | 46.831 | 1.00       | 86.68 | 1SG1991 |
| ATOM | 1991 | CE2 | PHE | 249 | 137.080 | 21.565 | 44.700 | 1.00       | 86.68 | 1SG1992 |
| ATOM | 1992 | CZ  | PHE | 249 | 137.029 | 20.545 | 45.619 | 1.00       | 86.68 | 1SG1993 |
| ATOM | 1993 | C   | PHE | 249 | 137.416 | 25.387 | 47.316 | 1.00       | 86.68 | 1SG1994 |
| ATOM | 1994 | O   | PHE | 249 | 138.368 | 24.793 | 47.821 | 1.00       | 86.68 | 1SG1995 |
| ATOM | 1995 | N   | ILE | 250 | 137.604 | 26.381 | 46.423 | 1.00144.79 |       | 1SG1996 |
| ATOM | 1996 | CA  | ILE | 250 | 138.945 | 26.579 | 45.945 | 1.00144.79 |       | 1SG1997 |
| ATOM | 1997 | CB  | ILE | 250 | 139.053 | 27.461 | 44.726 | 1.00144.79 |       | 1SG1998 |
| ATOM | 1998 | CG2 | ILE | 250 | 140.544 | 27.789 | 44.543 | 1.00144.79 |       | 1SG1999 |
| ATOM | 1999 | CG1 | ILE | 250 | 138.418 | 26.834 | 43.473 | 1.00144.79 |       | 1SG2000 |
| ATOM | 2000 | CD1 | ILE | 250 | 136.904 | 26.987 | 43.384 | 1.00144.79 |       | 1SG2001 |
| ATOM | 2001 | C   | ILE | 250 | 139.968 | 27.161 | 46.897 | 1.00144.79 |       | 1SG2002 |
| ATOM | 2002 | O   | ILE | 250 | 140.963 | 26.501 | 47.190 | 1.00144.79 |       | 1SG2003 |
| ATOM | 2003 | N   | GLU | 251 | 139.776 | 28.396 | 47.419 | 1.00211.44 |       | 1SG2004 |
| ATOM | 2004 | CA  | GLU | 251 | 141.012 | 28.970 | 47.911 | 1.00211.44 |       | 1SG2005 |
| ATOM | 2005 | CB  | GLU | 251 | 140.975 | 30.499 | 47.991 | 1.00211.44 |       | 1SG2006 |
| ATOM | 2006 | CG  | GLU | 251 | 141.102 | 31.152 | 46.620 | 1.00211.44 |       | 1SG2007 |
| ATOM | 2007 | CD  | GLU | 251 | 142.475 | 30.796 | 46.061 | 1.00211.44 |       | 1SG2008 |
| ATOM | 2008 | OE1 | GLU | 251 | 143.448 | 31.538 | 46.360 | 1.00211.44 |       | 1SG2009 |
| ATOM | 2009 | OE2 | GLU | 251 | 142.570 | 29.770 | 45.334 | 1.00211.44 |       | 1SG2010 |
| ATOM | 2010 | C   | GLU | 251 | 141.676 | 28.522 | 49.172 | 1.00211.44 |       | 1SG2011 |
| ATOM | 2011 | O   | GLU | 251 | 142.003 | 27.352 | 49.364 | 1.00211.44 |       | 1SG2012 |
| ATOM | 2012 | N   | ILE | 252 | 141.830 | 29.506 | 50.097 | 1.00240.05 |       | 1SG2013 |
| ATOM | 2013 | CA  | ILE | 252 | 142.565 | 29.298 | 51.313 | 1.00240.05 |       | 1SG2014 |
| ATOM | 2014 | CB  | ILE | 252 | 143.015 | 30.586 | 51.978 | 1.00240.05 |       | 1SG2015 |
| ATOM | 2015 | CG2 | ILE | 252 | 141.798 | 31.437 | 52.375 | 1.00240.05 |       | 1SG2016 |
| ATOM | 2016 | CG1 | ILE | 252 | 144.009 | 30.310 | 53.124 | 1.00240.05 |       | 1SG2017 |
| ATOM | 2017 | CD1 | ILE | 252 | 143.434 | 29.538 | 54.312 | 1.00240.05 |       | 1SG2018 |
| ATOM | 2018 | C   | ILE | 252 | 141.694 | 28.496 | 52.180 | 1.00240.05 |       | 1SG2019 |
| ATOM | 2019 | O   | ILE | 252 | 142.086 | 27.461 | 52.717 | 1.00240.05 |       | 1SG2020 |
| ATOM | 2020 | N   | PHE | 253 | 140.451 | 28.972 | 52.314 | 1.00289.37 |       | 1SG2021 |
| ATOM | 2021 | CA  | PHE | 253 | 139.509 | 28.150 | 52.960 | 1.00289.37 |       | 1SG2022 |
| ATOM | 2022 | CB  | PHE | 253 | 138.246 | 28.884 | 53.434 | 1.00289.37 |       | 1SG2023 |
| ATOM | 2023 | CG  | PHE | 253 | 137.440 | 27.901 | 54.209 | 1.00289.37 |       | 1SG2024 |
| ATOM | 2024 | CD1 | PHE | 253 | 137.694 | 27.690 | 55.545 | 1.00289.37 |       | 1SG2025 |
| ATOM | 2025 | CD2 | PHE | 253 | 136.433 | 27.189 | 53.602 | 1.00289.37 |       | 1SG2026 |
| ATOM | 2026 | CE1 | PHE | 253 | 136.954 | 26.783 | 56.267 | 1.00289.37 |       | 1SG2027 |
| ATOM | 2027 | CE2 | PHE | 253 | 135.690 | 26.280 | 54.318 | 1.00289.37 |       | 1SG2028 |
| ATOM | 2028 | CZ  | PHE | 253 | 135.948 | 26.077 | 55.652 | 1.00289.37 |       | 1SG2029 |
| ATOM | 2029 | C   | PHE | 253 | 139.162 | 27.305 | 51.806 | 1.00289.37 |       | 1SG2030 |
| ATOM | 2030 | O   | PHE | 253 | 139.151 | 27.781 | 50.672 | 1.00289.37 |       | 1SG2031 |
| ATOM | 2031 | N   | GLY | 254 | 138.886 | 26.026 | 52.028 | 1.00365.59 |       | 1SG2032 |
| ATOM | 2032 | CA  | GLY | 254 | 138.650 | 25.271 | 50.854 | 1.00365.59 |       | 1SG2033 |
| ATOM | 2033 | C   | GLY | 254 | 139.524 | 24.084 | 50.828 | 1.00365.59 |       | 1SG2034 |
| ATOM | 2034 | O   | GLY | 254 | 140.607 | 24.052 | 51.406 | 1.00365.59 |       | 1SG2035 |
| ATOM | 2035 | N   | GLN | 255 | 138.992 | 23.034 | 50.193 | 1.00168.56 |       | 1SG2036 |
| ATOM | 2036 | CA  | GLN | 255 | 139.680 | 21.794 | 50.108 | 1.00168.56 |       | 1SG2037 |
| ATOM | 2037 | CB  | GLN | 255 | 138.795 | 20.621 | 49.648 | 1.00168.56 |       | 1SG2038 |
| ATOM | 2038 | CG  | GLN | 255 | 137.736 | 20.182 | 50.660 | 1.00168.56 |       | 1SG2039 |
| ATOM | 2039 | CD  | GLN | 255 | 136.533 | 21.104 | 50.534 | 1.00168.56 |       | 1SG2040 |
| ATOM | 2040 | OE1 | GLN | 255 | 136.584 | 22.286 | 50.869 | 1.00168.56 |       | 1SG2041 |
| ATOM | 2041 | NE2 | GLN | 255 | 135.403 | 20.541 | 50.031 | 1.00168.56 |       | 1SG2042 |
| ATOM | 2042 | C   | GLN | 255 | 140.812 | 21.843 | 49.147 | 1.00168.56 |       | 1SG2043 |
| ATOM | 2043 | O   | GLN | 255 | 141.895 | 21.353 | 49.454 | 1.00168.56 |       | 1SG2044 |
| ATOM | 2044 | N   | ILE | 256 | 140.599 | 22.449 | 47.963 | 1.00118.43 |       | 1SG2045 |
| ATOM | 2045 | CA  | ILE | 256 | 141.578 | 22.282 | 46.927 | 1.00118.43 |       | 1SG2046 |
| ATOM | 2046 | CB  | ILE | 256 | 141.135 | 22.773 | 45.580 | 1.00118.43 |       | 1SG2047 |
| ATOM | 2047 | CG2 | ILE | 256 | 139.973 | 21.887 | 45.123 | 1.00118.43 |       | 1SG2048 |
| ATOM | 2048 | CG1 | ILE | 256 | 140.825 | 24.275 | 45.596 | 1.00118.43 |       | 1SG2049 |
| ATOM | 2049 | CD1 | ILE | 256 | 140.572 | 24.849 | 44.203 | 1.00118.43 |       | 1SG2050 |
| ATOM | 2050 | C   | ILE | 256 | 142.908 | 22.891 | 47.226 | 1.00118.43 |       | 1SG2051 |
| ATOM | 2051 | O   | ILE | 256 | 143.924 | 22.212 | 47.083 | 1.00118.43 |       | 1SG2052 |
| ATOM | 2052 | N   | ASP | 257 | 142.967 | 24.165 | 47.659 | 1.00       | 90.12 | 1SG2053 |
| ATOM | 2053 | CA  | ASP | 257 | 144.274 | 24.728 | 47.863 | 1.00       | 90.12 | 1SG2054 |
| ATOM | 2054 | CB  | ASP | 257 | 144.277 | 26.177 | 48.382 | 1.00       | 90.12 | 1SG2055 |
| ATOM | 2055 | CG  | ASP | 257 | 143.856 | 27.130 | 47.276 | 1.00       | 90.12 | 1SG2056 |
| ATOM | 2056 | OD1 | ASP | 257 | 143.539 | 26.645 | 46.161 | 1.00       | 90.12 | 1SG2057 |
| ATOM | 2057 | OD2 | ASP | 257 | 143.861 | 28.364 | 47.529 | 1.00       | 90.12 | 1SG2058 |

## Supplementary material 1.txt

|      |      |     |     |     |         |        |        |      |        |         |
|------|------|-----|-----|-----|---------|--------|--------|------|--------|---------|
| ATOM | 2058 | C   | ASP | 257 | 144.951 | 23.944 | 48.937 | 1.00 | 90.12  | 1SG2059 |
| ATOM | 2059 | O   | ASP | 257 | 146.127 | 23.601 | 48.832 | 1.00 | 90.12  | 1SG2060 |
| ATOM | 2060 | N   | SER | 258 | 144.197 | 23.638 | 50.004 | 1.00 | 91.24  | 1SG2061 |
| ATOM | 2061 | CA  | SER | 258 | 144.710 | 22.952 | 51.153 | 1.00 | 91.24  | 1SG2062 |
| ATOM | 2062 | CB  | SER | 258 | 143.748 | 23.005 | 52.351 | 1.00 | 91.24  | 1SG2063 |
| ATOM | 2063 | OG  | SER | 258 | 144.309 | 22.310 | 53.455 | 1.00 | 91.24  | 1SG2064 |
| ATOM | 2064 | C   | SER | 258 | 144.965 | 21.502 | 50.861 | 1.00 | 91.24  | 1SG2065 |
| ATOM | 2065 | O   | SER | 258 | 145.603 | 20.820 | 51.662 | 1.00 | 91.24  | 1SG2066 |
| ATOM | 2066 | N   | GLU | 259 | 144.465 | 20.976 | 49.726 | 1.00 | 83.72  | 1SG2067 |
| ATOM | 2067 | CA  | GLU | 259 | 144.609 | 19.571 | 49.468 | 1.00 | 83.72  | 1SG2068 |
| ATOM | 2068 | CB  | GLU | 259 | 143.890 | 19.109 | 48.188 | 1.00 | 83.72  | 1SG2069 |
| ATOM | 2069 | CG  | GLU | 259 | 143.837 | 17.588 | 48.033 | 1.00 | 83.72  | 1SG2070 |
| ATOM | 2070 | CD  | GLU | 259 | 142.793 | 17.060 | 49.005 | 1.00 | 83.72  | 1SG2071 |
| ATOM | 2071 | OE1 | GLU | 259 | 141.906 | 17.857 | 49.411 | 1.00 | 83.72  | 1SG2072 |
| ATOM | 2072 | OE2 | GLU | 259 | 142.868 | 15.852 | 49.356 | 1.00 | 83.72  | 1SG2073 |
| ATOM | 2073 | C   | GLU | 259 | 146.062 | 19.242 | 49.340 | 1.00 | 83.72  | 1SG2074 |
| ATOM | 2074 | O   | GLU | 259 | 146.806 | 19.925 | 48.637 | 1.00 | 83.72  | 1SG2075 |
| ATOM | 2075 | N   | LEU | 260 | 146.498 | 18.170 | 50.037 | 1.00 | 57.26  | 1SG2076 |
| ATOM | 2076 | CA  | LEU | 260 | 147.876 | 17.779 | 50.009 | 1.00 | 57.26  | 1SG2077 |
| ATOM | 2077 | CB  | LEU | 260 | 148.183 | 16.586 | 50.935 | 1.00 | 57.26  | 1SG2078 |
| ATOM | 2078 | CG  | LEU | 260 | 149.664 | 16.159 | 50.918 | 1.00 | 57.26  | 1SG2079 |
| ATOM | 2079 | CD2 | LEU | 260 | 149.877 | 14.842 | 51.690 | 1.00 | 57.26  | 1SG2080 |
| ATOM | 2080 | CD1 | LEU | 260 | 150.577 | 17.287 | 51.415 | 1.00 | 57.26  | 1SG2081 |
| ATOM | 2081 | C   | LEU | 260 | 148.216 | 17.369 | 48.619 | 1.00 | 57.26  | 1SG2082 |
| ATOM | 2082 | O   | LEU | 260 | 149.206 | 17.831 | 48.054 | 1.00 | 57.26  | 1SG2083 |
| ATOM | 2083 | N   | LYS | 261 | 147.389 | 16.497 | 48.013 | 1.00 | 219.81 | 1SG2084 |
| ATOM | 2084 | CA  | LYS | 261 | 147.707 | 16.123 | 46.673 | 1.00 | 219.81 | 1SG2085 |
| ATOM | 2085 | CB  | LYS | 261 | 147.913 | 14.612 | 46.468 | 1.00 | 219.81 | 1SG2086 |
| ATOM | 2086 | CG  | LYS | 261 | 148.462 | 14.278 | 45.081 | 1.00 | 219.81 | 1SG2087 |
| ATOM | 2087 | CD  | LYS | 261 | 149.010 | 12.856 | 44.944 | 1.00 | 219.81 | 1SG2088 |
| ATOM | 2088 | CE  | LYS | 261 | 147.998 | 11.855 | 44.385 | 1.00 | 219.81 | 1SG2089 |
| ATOM | 2089 | NZ  | LYS | 261 | 146.929 | 11.608 | 45.377 | 1.00 | 219.81 | 1SG2090 |
| ATOM | 2090 | C   | LYS | 261 | 146.570 | 16.544 | 45.816 | 1.00 | 219.81 | 1SG2091 |
| ATOM | 2091 | O   | LYS | 261 | 145.650 | 15.774 | 45.544 | 1.00 | 219.81 | 1SG2092 |
| ATOM | 2092 | N   | SER | 262 | 146.619 | 17.801 | 45.355 | 1.00 | 109.28 | 1SG2093 |
| ATOM | 2093 | CA  | SER | 262 | 145.595 | 18.283 | 44.490 | 1.00 | 109.28 | 1SG2094 |
| ATOM | 2094 | CB  | SER | 262 | 144.678 | 19.342 | 45.130 | 1.00 | 109.28 | 1SG2095 |
| ATOM | 2095 | OG  | SER | 262 | 143.694 | 19.765 | 44.198 | 1.00 | 109.28 | 1SG2096 |
| ATOM | 2096 | C   | SER | 262 | 146.320 | 18.927 | 43.369 | 1.00 | 109.28 | 1SG2097 |
| ATOM | 2097 | O   | SER | 262 | 147.542 | 19.069 | 43.409 | 1.00 | 109.28 | 1SG2098 |
| ATOM | 2098 | N   | ASN | 263 | 145.594 | 19.301 | 42.308 | 1.00 | 113.71 | 1SG2099 |
| ATOM | 2099 | CA  | ASN | 263 | 146.290 | 19.966 | 41.255 | 1.00 | 113.71 | 1SG2100 |
| ATOM | 2100 | CB  | ASN | 263 | 145.481 | 19.970 | 39.946 | 1.00 | 113.71 | 1SG2101 |
| ATOM | 2101 | CG  | ASN | 263 | 145.534 | 18.568 | 39.360 | 1.00 | 113.71 | 1SG2102 |
| ATOM | 2102 | OD1 | ASN | 263 | 146.252 | 18.322 | 38.392 | 1.00 | 113.71 | 1SG2103 |
| ATOM | 2103 | ND2 | ASN | 263 | 144.774 | 17.621 | 39.971 | 1.00 | 113.71 | 1SG2104 |
| ATOM | 2104 | C   | ASN | 263 | 146.423 | 21.392 | 41.699 | 1.00 | 113.71 | 1SG2105 |
| ATOM | 2105 | O   | ASN | 263 | 146.021 | 22.295 | 40.970 | 1.00 | 113.71 | 1SG2106 |
| ATOM | 2106 | N   | LEU | 264 | 147.000 | 21.622 | 42.906 | 1.00 | 94.18  | 1SG2107 |
| ATOM | 2107 | CA  | LEU | 264 | 147.117 | 22.950 | 43.452 | 1.00 | 94.18  | 1SG2108 |
| ATOM | 2108 | CB  | LEU | 264 | 147.860 | 22.993 | 44.799 | 1.00 | 94.18  | 1SG2109 |
| ATOM | 2109 | CG  | LEU | 264 | 147.275 | 22.168 | 45.955 | 1.00 | 94.18  | 1SG2110 |
| ATOM | 2110 | CD2 | LEU | 264 | 148.049 | 22.442 | 47.256 | 1.00 | 94.18  | 1SG2111 |
| ATOM | 2111 | CD1 | LEU | 264 | 147.259 | 20.671 | 45.622 | 1.00 | 94.18  | 1SG2112 |
| ATOM | 2112 | C   | LEU | 264 | 148.017 | 23.742 | 42.573 | 1.00 | 94.18  | 1SG2113 |
| ATOM | 2113 | O   | LEU | 264 | 147.616 | 24.725 | 41.952 | 1.00 | 94.18  | 1SG2114 |
| ATOM | 2114 | N   | SER | 265 | 149.280 | 23.286 | 42.497 | 1.00 | 87.80  | 1SG2115 |
| ATOM | 2115 | CA  | SER | 265 | 150.254 | 23.923 | 41.674 | 1.00 | 87.80  | 1SG2116 |
| ATOM | 2116 | CB  | SER | 265 | 151.687 | 23.442 | 41.949 | 1.00 | 87.80  | 1SG2117 |
| ATOM | 2117 | OG  | SER | 265 | 152.596 | 24.116 | 41.091 | 1.00 | 87.80  | 1SG2118 |
| ATOM | 2118 | C   | SER | 265 | 149.888 | 23.487 | 40.315 | 1.00 | 87.80  | 1SG2119 |
| ATOM | 2119 | O   | SER | 265 | 150.247 | 24.104 | 39.313 | 1.00 | 87.80  | 1SG2120 |
| ATOM | 2120 | N   | LYS | 266 | 149.117 | 22.389 | 40.279 | 1.00 | 195.24 | 1SG2121 |
| ATOM | 2121 | CA  | LYS | 266 | 148.757 | 21.821 | 39.031 | 1.00 | 195.24 | 1SG2122 |
| ATOM | 2122 | CB  | LYS | 266 | 148.269 | 20.369 | 39.103 | 1.00 | 195.24 | 1SG2123 |
| ATOM | 2123 | CG  | LYS | 266 | 149.420 | 19.387 | 39.325 | 1.00 | 195.24 | 1SG2124 |
| ATOM | 2124 | CD  | LYS | 266 | 148.978 | 17.979 | 39.724 | 1.00 | 195.24 | 1SG2125 |
| ATOM | 2125 | CE  | LYS | 266 | 150.137 | 16.985 | 39.829 | 1.00 | 195.24 | 1SG2126 |
| ATOM | 2126 | NZ  | LYS | 266 | 151.026 | 17.357 | 40.951 | 1.00 | 195.24 | 1SG2127 |
| ATOM | 2127 | C   | LYS | 266 | 147.754 | 22.684 | 38.360 | 1.00 | 195.24 | 1SG2128 |
| ATOM | 2128 | O   | LYS | 266 | 147.306 | 23.706 | 38.880 | 1.00 | 195.24 | 1SG2129 |

## Supplementary material 1.txt

|      |      |     |     |     |         |        |        |            |         |
|------|------|-----|-----|-----|---------|--------|--------|------------|---------|
| ATOM | 2129 | N   | LYS | 267 | 147.406 | 22.259 | 37.141 | 1.00152.66 | 1SG2130 |
| ATOM | 2130 | CA  | LYS | 267 | 146.617 | 23.014 | 36.224 | 1.00152.66 | 1SG2131 |
| ATOM | 2131 | CB  | LYS | 267 | 146.417 | 22.272 | 34.894 | 1.00152.66 | 1SG2132 |
| ATOM | 2132 | CG  | LYS | 267 | 147.736 | 21.886 | 34.220 | 1.00152.66 | 1SG2133 |
| ATOM | 2133 | CD  | LYS | 267 | 148.645 | 23.073 | 33.897 | 1.00152.66 | 1SG2134 |
| ATOM | 2134 | CE  | LYS | 267 | 150.029 | 22.659 | 33.391 | 1.00152.66 | 1SG2135 |
| ATOM | 2135 | NZ  | LYS | 267 | 150.776 | 21.971 | 34.469 | 1.00152.66 | 1SG2136 |
| ATOM | 2136 | C   | LYS | 267 | 145.256 | 23.320 | 36.761 | 1.00152.66 | 1SG2137 |
| ATOM | 2137 | O   | LYS | 267 | 144.765 | 24.431 | 36.580 | 1.00152.66 | 1SG2138 |
| ATOM | 2138 | N   | MET | 268 | 144.602 | 22.353 | 37.427 | 1.00107.32 | 1SG2139 |
| ATOM | 2139 | CA  | MET | 268 | 143.239 | 22.551 | 37.831 | 1.00107.32 | 1SG2140 |
| ATOM | 2140 | CB  | MET | 268 | 142.644 | 21.297 | 38.487 | 1.00107.32 | 1SG2141 |
| ATOM | 2141 | CG  | MET | 268 | 142.654 | 20.075 | 37.564 | 1.00107.32 | 1SG2142 |
| ATOM | 2142 | SD  | MET | 268 | 141.655 | 20.248 | 36.056 | 1.00107.32 | 1SG2143 |
| ATOM | 2143 | CE  | MET | 268 | 141.992 | 18.568 | 35.453 | 1.00107.32 | 1SG2144 |
| ATOM | 2144 | C   | MET | 268 | 143.114 | 23.679 | 38.811 | 1.00107.32 | 1SG2145 |
| ATOM | 2145 | O   | MET | 268 | 142.224 | 24.519 | 38.684 | 1.00107.32 | 1SG2146 |
| ATOM | 2146 | N   | LEU | 269 | 144.004 | 23.731 | 39.821 | 1.00 56.95 | 1SG2147 |
| ATOM | 2147 | CA  | LEU | 269 | 143.902 | 24.750 | 40.829 | 1.00 56.95 | 1SG2148 |
| ATOM | 2148 | CB  | LEU | 269 | 144.878 | 24.555 | 41.999 | 1.00 56.95 | 1SG2149 |
| ATOM | 2149 | CG  | LEU | 269 | 144.757 | 25.655 | 43.062 | 1.00 56.95 | 1SG2150 |
| ATOM | 2150 | CD2 | LEU | 269 | 145.798 | 25.492 | 44.179 | 1.00 56.95 | 1SG2151 |
| ATOM | 2151 | CD1 | LEU | 269 | 143.322 | 25.710 | 43.600 | 1.00 56.95 | 1SG2152 |
| ATOM | 2152 | C   | LEU | 269 | 144.170 | 26.097 | 40.242 | 1.00 56.95 | 1SG2153 |
| ATOM | 2153 | O   | LEU | 269 | 143.476 | 27.065 | 40.550 | 1.00 56.95 | 1SG2154 |
| ATOM | 2154 | N   | GLU | 270 | 145.196 | 26.199 | 39.378 | 1.00 64.07 | 1SG2155 |
| ATOM | 2155 | CA  | GLU | 270 | 145.545 | 27.468 | 38.813 | 1.00 64.07 | 1SG2156 |
| ATOM | 2156 | CB  | GLU | 270 | 146.806 | 27.412 | 37.938 | 1.00 64.07 | 1SG2157 |
| ATOM | 2157 | CG  | GLU | 270 | 146.675 | 26.475 | 36.738 | 1.00 64.07 | 1SG2158 |
| ATOM | 2158 | CD  | GLU | 270 | 147.925 | 26.638 | 35.890 | 1.00 64.07 | 1SG2159 |
| ATOM | 2159 | OE1 | GLU | 270 | 148.534 | 27.740 | 35.943 | 1.00 64.07 | 1SG2160 |
| ATOM | 2160 | OE2 | GLU | 270 | 148.286 | 25.664 | 35.177 | 1.00 64.07 | 1SG2161 |
| ATOM | 2161 | C   | GLU | 270 | 144.421 | 27.940 | 37.950 | 1.00 64.07 | 1SG2162 |
| ATOM | 2162 | O   | GLU | 270 | 144.069 | 29.118 | 37.961 | 1.00 64.07 | 1SG2163 |
| ATOM | 2163 | N   | LEU | 271 | 143.819 | 27.015 | 37.183 | 1.00 99.76 | 1SG2164 |
| ATOM | 2164 | CA  | LEU | 271 | 142.775 | 27.374 | 36.271 | 1.00 99.76 | 1SG2165 |
| ATOM | 2165 | CB  | LEU | 271 | 142.266 | 26.166 | 35.459 | 1.00 99.76 | 1SG2166 |
| ATOM | 2166 | CG  | LEU | 271 | 141.255 | 26.506 | 34.342 | 1.00 99.76 | 1SG2167 |
| ATOM | 2167 | CD2 | LEU | 271 | 141.868 | 27.498 | 33.342 | 1.00 99.76 | 1SG2168 |
| ATOM | 2168 | CD1 | LEU | 271 | 139.894 | 26.967 | 34.889 | 1.00 99.76 | 1SG2169 |
| ATOM | 2169 | C   | LEU | 271 | 141.628 | 27.921 | 37.063 | 1.00 99.76 | 1SG2170 |
| ATOM | 2170 | O   | LEU | 271 | 141.051 | 28.944 | 36.697 | 1.00 99.76 | 1SG2171 |
| ATOM | 2171 | N   | ALA | 272 | 141.281 | 27.257 | 38.182 | 1.00 45.89 | 1SG2172 |
| ATOM | 2172 | CA  | ALA | 272 | 140.146 | 27.642 | 38.970 | 1.00 45.89 | 1SG2173 |
| ATOM | 2173 | CB  | ALA | 272 | 139.899 | 26.694 | 40.156 | 1.00 45.89 | 1SG2174 |
| ATOM | 2174 | C   | ALA | 272 | 140.334 | 29.021 | 39.527 | 1.00 45.89 | 1SG2175 |
| ATOM | 2175 | O   | ALA | 272 | 139.411 | 29.833 | 39.494 | 1.00 45.89 | 1SG2176 |
| ATOM | 2176 | N   | LYS | 273 | 141.536 | 29.325 | 40.052 | 1.00 59.36 | 1SG2177 |
| ATOM | 2177 | CA  | LYS | 273 | 141.782 | 30.597 | 40.672 | 1.00 59.36 | 1SG2178 |
| ATOM | 2178 | CB  | LYS | 273 | 143.182 | 30.700 | 41.298 | 1.00 59.36 | 1SG2179 |
| ATOM | 2179 | CG  | LYS | 273 | 143.393 | 29.798 | 42.513 | 1.00 59.36 | 1SG2180 |
| ATOM | 2180 | CD  | LYS | 273 | 144.859 | 29.709 | 42.941 | 1.00 59.36 | 1SG2181 |
| ATOM | 2181 | CE  | LYS | 273 | 145.078 | 28.903 | 44.221 | 1.00 59.36 | 1SG2182 |
| ATOM | 2182 | NZ  | LYS | 273 | 146.518 | 28.871 | 44.558 | 1.00 59.36 | 1SG2183 |
| ATOM | 2183 | C   | LYS | 273 | 141.692 | 31.712 | 39.672 | 1.00 59.36 | 1SG2184 |
| ATOM | 2184 | O   | LYS | 273 | 141.069 | 32.739 | 39.937 | 1.00 59.36 | 1SG2185 |
| ATOM | 2185 | N   | LEU | 274 | 142.318 | 31.537 | 38.495 | 1.00 53.24 | 1SG2186 |
| ATOM | 2186 | CA  | LEU | 274 | 142.359 | 32.575 | 37.502 | 1.00 53.24 | 1SG2187 |
| ATOM | 2187 | CB  | LEU | 274 | 143.183 | 32.180 | 36.262 | 1.00 53.24 | 1SG2188 |
| ATOM | 2188 | CG  | LEU | 274 | 144.684 | 31.964 | 36.536 | 1.00 53.24 | 1SG2189 |
| ATOM | 2189 | CD2 | LEU | 274 | 145.314 | 33.178 | 37.234 | 1.00 53.24 | 1SG2190 |
| ATOM | 2190 | CD1 | LEU | 274 | 145.428 | 31.574 | 35.249 | 1.00 53.24 | 1SG2191 |
| ATOM | 2191 | C   | LEU | 274 | 140.975 | 32.877 | 37.019 | 1.00 53.24 | 1SG2192 |
| ATOM | 2192 | O   | LEU | 274 | 140.583 | 34.039 | 36.917 | 1.00 53.24 | 1SG2193 |
| ATOM | 2193 | N   | ASP | 275 | 140.195 | 31.822 | 36.726 | 1.00 69.26 | 1SG2194 |
| ATOM | 2194 | CA  | ASP | 275 | 138.877 | 31.956 | 36.169 | 1.00 69.26 | 1SG2195 |
| ATOM | 2195 | CB  | ASP | 275 | 138.267 | 30.573 | 35.863 | 1.00 69.26 | 1SG2196 |
| ATOM | 2196 | CG  | ASP | 275 | 136.936 | 30.742 | 35.149 | 1.00 69.26 | 1SG2197 |
| ATOM | 2197 | OD1 | ASP | 275 | 135.942 | 31.115 | 35.827 | 1.00 69.26 | 1SG2198 |
| ATOM | 2198 | OD2 | ASP | 275 | 136.890 | 30.484 | 33.918 | 1.00 69.26 | 1SG2199 |
| ATOM | 2199 | C   | ASP | 275 | 137.980 | 32.682 | 37.131 | 1.00 69.26 | 1SG2200 |

## Supplementary material 1.txt

|      |      |     |     |     |         |        |        |      |        |         |
|------|------|-----|-----|-----|---------|--------|--------|------|--------|---------|
| ATOM | 2200 | O   | ASP | 275 | 137.250 | 33.595 | 36.747 | 1.00 | 69.26  | 1SG2201 |
| ATOM | 2201 | N   | PHE | 276 | 138.037 | 32.322 | 38.426 | 1.00 | 125.71 | 1SG2202 |
| ATOM | 2202 | CA  | PHE | 276 | 137.171 | 32.918 | 39.405 | 1.00 | 125.71 | 1SG2203 |
| ATOM | 2203 | CB  | PHE | 276 | 137.392 | 32.296 | 40.803 | 1.00 | 125.71 | 1SG2204 |
| ATOM | 2204 | CG  | PHE | 276 | 136.404 | 32.824 | 41.793 | 1.00 | 125.71 | 1SG2205 |
| ATOM | 2205 | CD1 | PHE | 276 | 136.668 | 33.967 | 42.514 | 1.00 | 125.71 | 1SG2206 |
| ATOM | 2206 | CD2 | PHE | 276 | 135.213 | 32.167 | 42.014 | 1.00 | 125.71 | 1SG2207 |
| ATOM | 2207 | CE1 | PHE | 276 | 135.759 | 34.448 | 43.428 | 1.00 | 125.71 | 1SG2208 |
| ATOM | 2208 | CE2 | PHE | 276 | 134.301 | 32.644 | 42.927 | 1.00 | 125.71 | 1SG2209 |
| ATOM | 2209 | CZ  | PHE | 276 | 134.574 | 33.787 | 43.639 | 1.00 | 125.71 | 1SG2210 |
| ATOM | 2210 | C   | PHE | 276 | 137.466 | 34.386 | 39.470 | 1.00 | 125.71 | 1SG2211 |
| ATOM | 2211 | O   | PHE | 276 | 136.552 | 35.209 | 39.498 | 1.00 | 125.71 | 1SG2212 |
| ATOM | 2212 | N   | ASN | 277 | 138.764 | 34.747 | 39.487 | 1.00 | 48.98  | 1SG2213 |
| ATOM | 2213 | CA  | ASN | 277 | 139.186 | 36.119 | 39.588 | 1.00 | 48.98  | 1SG2214 |
| ATOM | 2214 | CB  | ASN | 277 | 140.714 | 36.267 | 39.719 | 1.00 | 48.98  | 1SG2215 |
| ATOM | 2215 | CG  | ASN | 277 | 141.135 | 35.763 | 41.092 | 1.00 | 48.98  | 1SG2216 |
| ATOM | 2216 | OD1 | ASN | 277 | 140.318 | 35.675 | 42.008 | 1.00 | 48.98  | 1SG2217 |
| ATOM | 2217 | ND2 | ASN | 277 | 142.446 | 35.434 | 41.248 | 1.00 | 48.98  | 1SG2218 |
| ATOM | 2218 | C   | ASN | 277 | 138.784 | 36.896 | 38.368 | 1.00 | 48.98  | 1SG2219 |
| ATOM | 2219 | O   | ASN | 277 | 138.392 | 38.056 | 38.479 | 1.00 | 48.98  | 1SG2220 |
| ATOM | 2220 | N   | ILE | 278 | 138.903 | 36.297 | 37.166 | 1.00 | 82.80  | 1SG2221 |
| ATOM | 2221 | CA  | ILE | 278 | 138.591 | 37.016 | 35.958 | 1.00 | 82.80  | 1SG2222 |
| ATOM | 2222 | CB  | ILE | 278 | 138.972 | 36.275 | 34.701 | 1.00 | 82.80  | 1SG2223 |
| ATOM | 2223 | CG2 | ILE | 278 | 138.096 | 35.021 | 34.568 | 1.00 | 82.80  | 1SG2224 |
| ATOM | 2224 | CG1 | ILE | 278 | 138.893 | 37.208 | 33.481 | 1.00 | 82.80  | 1SG2225 |
| ATOM | 2225 | CD1 | ILE | 278 | 139.550 | 36.621 | 32.232 | 1.00 | 82.80  | 1SG2226 |
| ATOM | 2226 | C   | ILE | 278 | 137.127 | 37.331 | 35.907 | 1.00 | 82.80  | 1SG2227 |
| ATOM | 2227 | O   | ILE | 278 | 136.738 | 38.443 | 35.551 | 1.00 | 82.80  | 1SG2228 |
| ATOM | 2228 | N   | LEU | 279 | 136.272 | 36.352 | 36.263 | 1.00 | 53.62  | 1SG2229 |
| ATOM | 2229 | CA  | LEU | 279 | 134.848 | 36.535 | 36.244 | 1.00 | 53.62  | 1SG2230 |
| ATOM | 2230 | CB  | LEU | 279 | 134.066 | 35.265 | 36.626 | 1.00 | 53.62  | 1SG2231 |
| ATOM | 2231 | CG  | LEU | 279 | 134.197 | 34.101 | 35.628 | 1.00 | 53.62  | 1SG2232 |
| ATOM | 2232 | CD2 | LEU | 279 | 133.858 | 34.543 | 34.195 | 1.00 | 53.62  | 1SG2233 |
| ATOM | 2233 | CD1 | LEU | 279 | 133.367 | 32.890 | 36.082 | 1.00 | 53.62  | 1SG2234 |
| ATOM | 2234 | C   | LEU | 279 | 134.489 | 37.575 | 37.257 | 1.00 | 53.62  | 1SG2235 |
| ATOM | 2235 | O   | LEU | 279 | 133.583 | 38.378 | 37.047 | 1.00 | 53.62  | 1SG2236 |
| ATOM | 2236 | N   | GLN | 280 | 135.206 | 37.598 | 38.392 | 1.00 | 101.90 | 1SG2237 |
| ATOM | 2237 | CA  | GLN | 280 | 134.891 | 38.523 | 39.445 | 1.00 | 101.90 | 1SG2238 |
| ATOM | 2238 | CB  | GLN | 280 | 135.879 | 38.500 | 40.622 | 1.00 | 101.90 | 1SG2239 |
| ATOM | 2239 | CG  | GLN | 280 | 135.898 | 37.221 | 41.450 | 1.00 | 101.90 | 1SG2240 |
| ATOM | 2240 | CD  | GLN | 280 | 136.798 | 37.513 | 42.641 | 1.00 | 101.90 | 1SG2241 |
| ATOM | 2241 | OE1 | GLN | 280 | 137.907 | 36.992 | 42.750 | 1.00 | 101.90 | 1SG2242 |
| ATOM | 2242 | NE2 | GLN | 280 | 136.313 | 38.392 | 43.559 | 1.00 | 101.90 | 1SG2243 |
| ATOM | 2243 | C   | GLN | 280 | 134.988 | 39.907 | 38.898 | 1.00 | 101.90 | 1SG2244 |
| ATOM | 2244 | O   | GLN | 280 | 134.212 | 40.781 | 39.279 | 1.00 | 101.90 | 1SG2245 |
| ATOM | 2245 | N   | CYS | 281 | 135.961 | 40.145 | 38.001 | 1.00 | 33.94  | 1SG2246 |
| ATOM | 2246 | CA  | CYS | 281 | 136.161 | 41.457 | 37.461 | 1.00 | 33.94  | 1SG2247 |
| ATOM | 2247 | CB  | CYS | 281 | 137.323 | 41.521 | 36.456 | 1.00 | 33.94  | 1SG2248 |
| ATOM | 2248 | SG  | CYS | 281 | 138.934 | 41.229 | 37.243 | 1.00 | 33.94  | 1SG2249 |
| ATOM | 2249 | C   | CYS | 281 | 134.925 | 41.878 | 36.733 | 1.00 | 33.94  | 1SG2250 |
| ATOM | 2250 | O   | CYS | 281 | 134.513 | 43.032 | 36.837 | 1.00 | 33.94  | 1SG2251 |
| ATOM | 2251 | N   | THR | 282 | 134.305 | 40.960 | 35.965 | 1.00 | 97.09  | 1SG2252 |
| ATOM | 2252 | CA  | THR | 282 | 133.133 | 41.329 | 35.222 | 1.00 | 97.09  | 1SG2253 |
| ATOM | 2253 | CB  | THR | 282 | 132.657 | 40.290 | 34.243 | 1.00 | 97.09  | 1SG2254 |
| ATOM | 2254 | OG1 | THR | 282 | 131.746 | 40.881 | 33.329 | 1.00 | 97.09  | 1SG2255 |
| ATOM | 2255 | CG2 | THR | 282 | 131.953 | 39.148 | 34.991 | 1.00 | 97.09  | 1SG2256 |
| ATOM | 2256 | C   | THR | 282 | 132.016 | 41.626 | 36.173 | 1.00 | 97.09  | 1SG2257 |
| ATOM | 2257 | O   | THR | 282 | 131.250 | 42.565 | 35.965 | 1.00 | 97.09  | 1SG2258 |
| ATOM | 2258 | N   | HIS | 283 | 131.906 | 40.836 | 37.257 | 1.00 | 52.05  | 1SG2259 |
| ATOM | 2259 | CA  | HIS | 283 | 130.864 | 41.007 | 38.229 | 1.00 | 52.05  | 1SG2260 |
| ATOM | 2260 | ND1 | HIS | 283 | 131.293 | 37.521 | 39.773 | 1.00 | 52.05  | 1SG2261 |
| ATOM | 2261 | CG  | HIS | 283 | 130.932 | 38.586 | 38.977 | 1.00 | 52.05  | 1SG2262 |
| ATOM | 2262 | CB  | HIS | 283 | 131.010 | 40.021 | 39.403 | 1.00 | 52.05  | 1SG2263 |
| ATOM | 2263 | NE2 | HIS | 283 | 130.604 | 36.665 | 37.840 | 1.00 | 52.05  | 1SG2264 |
| ATOM | 2264 | CD2 | HIS | 283 | 130.514 | 38.045 | 37.800 | 1.00 | 52.05  | 1SG2265 |
| ATOM | 2265 | CE1 | HIS | 283 | 131.077 | 36.397 | 39.044 | 1.00 | 52.05  | 1SG2266 |
| ATOM | 2266 | C   | HIS | 283 | 131.006 | 42.378 | 38.805 | 1.00 | 52.05  | 1SG2267 |
| ATOM | 2267 | O   | HIS | 283 | 130.024 | 43.092 | 39.000 | 1.00 | 52.05  | 1SG2268 |
| ATOM | 2268 | N   | GLN | 284 | 132.260 | 42.770 | 39.085 | 1.00 | 77.61  | 1SG2269 |
| ATOM | 2269 | CA  | GLN | 284 | 132.565 | 44.037 | 39.676 | 1.00 | 77.61  | 1SG2270 |
| ATOM | 2270 | CB  | GLN | 284 | 134.071 | 44.170 | 39.956 | 1.00 | 77.61  | 1SG2271 |



## Supplementary material 1.txt

|      |      |     |     |     |         |        |        |      |        |         |
|------|------|-----|-----|-----|---------|--------|--------|------|--------|---------|
| ATOM | 2271 | CG  | GLN | 284 | 134.497 | 45.493 | 40.590 | 1.00 | 77.61  | 1SG2272 |
| ATOM | 2272 | CD  | GLN | 284 | 136.002 | 45.402 | 40.810 | 1.00 | 77.61  | 1SG2273 |
| ATOM | 2273 | OE1 | GLN | 284 | 136.472 | 44.547 | 41.560 | 1.00 | 77.61  | 1SG2274 |
| ATOM | 2274 | NE2 | GLN | 284 | 136.781 | 46.289 | 40.135 | 1.00 | 77.61  | 1SG2275 |
| ATOM | 2275 | C   | GLN | 284 | 132.145 | 45.135 | 38.747 | 1.00 | 77.61  | 1SG2276 |
| ATOM | 2276 | O   | GLN | 284 | 131.594 | 46.145 | 39.182 | 1.00 | 77.61  | 1SG2277 |
| ATOM | 2277 | N   | LYS | 285 | 132.396 | 44.970 | 37.435 | 1.00 | 113.60 | 1SG2278 |
| ATOM | 2278 | CA  | LYS | 285 | 132.053 | 46.003 | 36.501 | 1.00 | 113.60 | 1SG2279 |
| ATOM | 2279 | CB  | LYS | 285 | 132.557 | 45.717 | 35.076 | 1.00 | 113.60 | 1SG2280 |
| ATOM | 2280 | CG  | LYS | 285 | 132.658 | 46.976 | 34.212 | 1.00 | 113.60 | 1SG2281 |
| ATOM | 2281 | CD  | LYS | 285 | 131.344 | 47.747 | 34.086 | 1.00 | 113.60 | 1SG2282 |
| ATOM | 2282 | CE  | LYS | 285 | 131.508 | 49.120 | 33.430 | 1.00 | 113.60 | 1SG2283 |
| ATOM | 2283 | NZ  | LYS | 285 | 130.210 | 49.832 | 33.418 | 1.00 | 113.60 | 1SG2284 |
| ATOM | 2284 | C   | LYS | 285 | 130.561 | 46.154 | 36.447 | 1.00 | 113.60 | 1SG2285 |
| ATOM | 2285 | O   | LYS | 285 | 130.044 | 47.270 | 36.458 | 1.00 | 113.60 | 1SG2286 |
| ATOM | 2286 | N   | GLU | 286 | 129.825 | 45.026 | 36.400 | 1.00 | 125.01 | 1SG2287 |
| ATOM | 2287 | CA  | GLU | 286 | 128.396 | 45.083 | 36.286 | 1.00 | 125.01 | 1SG2288 |
| ATOM | 2288 | CB  | GLU | 286 | 127.766 | 43.719 | 35.980 | 1.00 | 125.01 | 1SG2289 |
| ATOM | 2289 | CG  | GLU | 286 | 128.189 | 42.608 | 36.925 | 1.00 | 125.01 | 1SG2290 |
| ATOM | 2290 | CD  | GLU | 286 | 127.604 | 41.342 | 36.348 | 1.00 | 125.01 | 1SG2291 |
| ATOM | 2291 | OE1 | GLU | 286 | 127.496 | 41.241 | 35.097 | 1.00 | 125.01 | 1SG2292 |
| ATOM | 2292 | OE2 | GLU | 286 | 127.258 | 40.453 | 37.167 | 1.00 | 125.01 | 1SG2293 |
| ATOM | 2293 | C   | GLU | 286 | 127.785 | 45.683 | 37.519 | 1.00 | 125.01 | 1SG2294 |
| ATOM | 2294 | O   | GLU | 286 | 126.835 | 46.458 | 37.424 | 1.00 | 125.01 | 1SG2295 |
| ATOM | 2295 | N   | LEU | 287 | 128.313 | 45.357 | 38.713 | 1.00 | 58.48  | 1SG2296 |
| ATOM | 2296 | CA  | LEU | 287 | 127.780 | 45.898 | 39.933 | 1.00 | 58.48  | 1SG2297 |
| ATOM | 2297 | CB  | LEU | 287 | 128.450 | 45.305 | 41.185 | 1.00 | 58.48  | 1SG2298 |
| ATOM | 2298 | CG  | LEU | 287 | 127.911 | 45.872 | 42.512 | 1.00 | 58.48  | 1SG2299 |
| ATOM | 2299 | CD2 | LEU | 287 | 128.714 | 45.329 | 43.704 | 1.00 | 58.48  | 1SG2300 |
| ATOM | 2300 | CD1 | LEU | 287 | 126.401 | 45.618 | 42.660 | 1.00 | 58.48  | 1SG2301 |
| ATOM | 2301 | C   | LEU | 287 | 127.995 | 47.386 | 39.935 | 1.00 | 58.48  | 1SG2302 |
| ATOM | 2302 | O   | LEU | 287 | 127.200 | 48.142 | 40.487 | 1.00 | 58.48  | 1SG2303 |
| ATOM | 2303 | N   | GLN | 288 | 129.111 | 47.841 | 39.343 | 1.00 | 60.64  | 1SG2304 |
| ATOM | 2304 | CA  | GLN | 288 | 129.441 | 49.239 | 39.263 | 1.00 | 60.64  | 1SG2305 |
| ATOM | 2305 | CB  | GLN | 288 | 130.771 | 49.412 | 38.512 | 1.00 | 60.64  | 1SG2306 |
| ATOM | 2306 | CG  | GLN | 288 | 131.193 | 50.841 | 38.172 | 1.00 | 60.64  | 1SG2307 |
| ATOM | 2307 | CD  | GLN | 288 | 132.363 | 50.698 | 37.208 | 1.00 | 60.64  | 1SG2308 |
| ATOM | 2308 | OE1 | GLN | 288 | 132.658 | 49.587 | 36.772 | 1.00 | 60.64  | 1SG2309 |
| ATOM | 2309 | NE2 | GLN | 288 | 133.053 | 51.820 | 36.872 | 1.00 | 60.64  | 1SG2310 |
| ATOM | 2310 | C   | GLN | 288 | 128.398 | 49.954 | 38.457 | 1.00 | 60.64  | 1SG2311 |
| ATOM | 2311 | O   | GLN | 288 | 127.898 | 51.002 | 38.865 | 1.00 | 60.64  | 1SG2312 |
| ATOM | 2312 | N   | ILE | 289 | 128.028 | 49.387 | 37.292 | 1.00 | 123.93 | 1SG2313 |
| ATOM | 2313 | CA  | ILE | 289 | 127.099 | 50.034 | 36.408 | 1.00 | 123.93 | 1SG2314 |
| ATOM | 2314 | CB  | ILE | 289 | 126.946 | 49.355 | 35.075 | 1.00 | 123.93 | 1SG2315 |
| ATOM | 2315 | CG2 | ILE | 289 | 126.200 | 48.029 | 35.273 | 1.00 | 123.93 | 1SG2316 |
| ATOM | 2316 | CG1 | ILE | 289 | 126.247 | 50.301 | 34.084 | 1.00 | 123.93 | 1SG2317 |
| ATOM | 2317 | CD1 | ILE | 289 | 127.088 | 51.520 | 33.702 | 1.00 | 123.93 | 1SG2318 |
| ATOM | 2318 | C   | ILE | 289 | 125.757 | 50.116 | 37.063 | 1.00 | 123.93 | 1SG2319 |
| ATOM | 2319 | O   | ILE | 289 | 125.049 | 51.111 | 36.924 | 1.00 | 123.93 | 1SG2320 |
| ATOM | 2320 | N   | ILE | 290 | 125.362 | 49.044 | 37.770 | 1.00 | 146.65 | 1SG2321 |
| ATOM | 2321 | CA  | ILE | 290 | 124.095 | 48.984 | 38.438 | 1.00 | 146.65 | 1SG2322 |
| ATOM | 2322 | CB  | ILE | 290 | 123.744 | 47.598 | 38.929 | 1.00 | 146.65 | 1SG2323 |
| ATOM | 2323 | CG2 | ILE | 290 | 123.623 | 46.706 | 37.684 | 1.00 | 146.65 | 1SG2324 |
| ATOM | 2324 | CG1 | ILE | 290 | 124.745 | 47.050 | 39.960 | 1.00 | 146.65 | 1SG2325 |
| ATOM | 2325 | CD1 | ILE | 290 | 124.643 | 47.680 | 41.347 | 1.00 | 146.65 | 1SG2326 |
| ATOM | 2326 | C   | ILE | 290 | 124.053 | 49.978 | 39.559 | 1.00 | 146.65 | 1SG2327 |
| ATOM | 2327 | O   | ILE | 290 | 122.993 | 50.517 | 39.871 | 1.00 | 146.65 | 1SG2328 |
| ATOM | 2328 | N   | SER | 291 | 125.195 | 50.203 | 40.234 | 1.00 | 43.09  | 1SG2329 |
| ATOM | 2329 | CA  | SER | 291 | 125.267 | 51.118 | 41.338 | 1.00 | 43.09  | 1SG2330 |
| ATOM | 2330 | CB  | SER | 291 | 126.628 | 51.063 | 42.039 | 1.00 | 43.09  | 1SG2331 |
| ATOM | 2331 | OG  | SER | 291 | 126.810 | 49.790 | 42.641 | 1.00 | 43.09  | 1SG2332 |
| ATOM | 2332 | C   | SER | 291 | 125.066 | 52.524 | 40.863 | 1.00 | 43.09  | 1SG2333 |
| ATOM | 2333 | O   | SER | 291 | 124.380 | 53.311 | 41.513 | 1.00 | 43.09  | 1SG2334 |
| ATOM | 2334 | N   | ARG | 292 | 125.683 | 52.878 | 39.721 | 1.00 | 60.69  | 1SG2335 |
| ATOM | 2335 | CA  | ARG | 292 | 125.593 | 54.207 | 39.183 | 1.00 | 60.69  | 1SG2336 |
| ATOM | 2336 | CB  | ARG | 292 | 126.491 | 54.391 | 37.949 | 1.00 | 60.69  | 1SG2337 |
| ATOM | 2337 | CG  | ARG | 292 | 127.979 | 54.335 | 38.301 | 1.00 | 60.69  | 1SG2338 |
| ATOM | 2338 | CD  | ARG | 292 | 128.918 | 54.433 | 37.098 | 1.00 | 60.69  | 1SG2339 |
| ATOM | 2339 | NE  | ARG | 292 | 130.307 | 54.464 | 37.634 | 1.00 | 60.69  | 1SG2340 |
| ATOM | 2340 | CZ  | ARG | 292 | 131.377 | 54.411 | 36.788 | 1.00 | 60.69  | 1SG2341 |
| ATOM | 2341 | NH1 | ARG | 292 | 131.185 | 54.250 | 35.447 | 1.00 | 60.69  | 1SG2342 |

## Supplementary material 1.txt

|      |      |     |     |     |         |        |        |      |        |         |
|------|------|-----|-----|-----|---------|--------|--------|------|--------|---------|
| ATOM | 2342 | NH2 | ARG | 292 | 132.639 | 54.537 | 37.290 | 1.00 | 60.69  | 1SG2343 |
| ATOM | 2343 | C   | ARG | 292 | 124.177 | 54.470 | 38.784 | 1.00 | 60.69  | 1SG2344 |
| ATOM | 2344 | O   | ARG | 292 | 123.638 | 55.549 | 39.023 | 1.00 | 60.69  | 1SG2345 |
| ATOM | 2345 | N   | TRP | 293 | 123.537 | 53.460 | 38.175 | 1.00 | 63.58  | 1SG2346 |
| ATOM | 2346 | CA  | TRP | 293 | 122.185 | 53.552 | 37.710 | 1.00 | 63.58  | 1SG2347 |
| ATOM | 2347 | CB  | TRP | 293 | 121.756 | 52.225 | 37.066 | 1.00 | 63.58  | 1SG2348 |
| ATOM | 2348 | CG  | TRP | 293 | 120.330 | 52.108 | 36.592 | 1.00 | 63.58  | 1SG2349 |
| ATOM | 2349 | CD2 | TRP | 293 | 119.313 | 51.411 | 37.326 | 1.00 | 63.58  | 1SG2350 |
| ATOM | 2350 | CD1 | TRP | 293 | 119.754 | 52.516 | 35.424 | 1.00 | 63.58  | 1SG2351 |
| ATOM | 2351 | NE1 | TRP | 293 | 118.445 | 52.095 | 35.375 | 1.00 | 63.58  | 1SG2352 |
| ATOM | 2352 | CE2 | TRP | 293 | 118.161 | 51.414 | 36.542 | 1.00 | 63.58  | 1SG2353 |
| ATOM | 2353 | CE3 | TRP | 293 | 119.347 | 50.799 | 38.546 | 1.00 | 63.58  | 1SG2354 |
| ATOM | 2354 | CZ2 | TRP | 293 | 117.019 | 50.798 | 36.968 | 1.00 | 63.58  | 1SG2355 |
| ATOM | 2355 | CZ3 | TRP | 293 | 118.188 | 50.199 | 38.984 | 1.00 | 63.58  | 1SG2356 |
| ATOM | 2356 | CH2 | TRP | 293 | 117.047 | 50.197 | 38.208 | 1.00 | 63.58  | 1SG2357 |
| ATOM | 2357 | C   | TRP | 293 | 121.320 | 53.810 | 38.901 | 1.00 | 63.58  | 1SG2358 |
| ATOM | 2358 | O   | TRP | 293 | 120.400 | 54.625 | 38.860 | 1.00 | 63.58  | 1SG2359 |
| ATOM | 2359 | N   | PHE | 294 | 121.614 | 53.097 | 39.998 | 1.00 | 107.42 | 1SG2360 |
| ATOM | 2360 | CA  | PHE | 294 | 120.912 | 53.173 | 41.245 | 1.00 | 107.42 | 1SG2361 |
| ATOM | 2361 | CB  | PHE | 294 | 121.393 | 52.098 | 42.234 | 1.00 | 107.42 | 1SG2362 |
| ATOM | 2362 | CG  | PHE | 294 | 120.613 | 52.222 | 43.496 | 1.00 | 107.42 | 1SG2363 |
| ATOM | 2363 | CD1 | PHE | 294 | 119.419 | 51.555 | 43.648 | 1.00 | 107.42 | 1SG2364 |
| ATOM | 2364 | CD2 | PHE | 294 | 121.075 | 53.003 | 44.530 | 1.00 | 107.42 | 1SG2365 |
| ATOM | 2365 | CE1 | PHE | 294 | 118.698 | 51.664 | 44.814 | 1.00 | 107.42 | 1SG2366 |
| ATOM | 2366 | CE2 | PHE | 294 | 120.358 | 53.117 | 45.697 | 1.00 | 107.42 | 1SG2367 |
| ATOM | 2367 | CZ  | PHE | 294 | 119.166 | 52.447 | 45.841 | 1.00 | 107.42 | 1SG2368 |
| ATOM | 2368 | C   | PHE | 294 | 121.148 | 54.510 | 41.886 | 1.00 | 107.42 | 1SG2369 |
| ATOM | 2369 | O   | PHE | 294 | 120.263 | 55.046 | 42.552 | 1.00 | 107.42 | 1SG2370 |
| ATOM | 2370 | N   | ALA | 295 | 122.352 | 55.086 | 41.701 | 1.00 | 62.88  | 1SG2371 |
| ATOM | 2371 | CA  | ALA | 295 | 122.750 | 56.264 | 42.420 | 1.00 | 62.88  | 1SG2372 |
| ATOM | 2372 | CB  | ALA | 295 | 124.168 | 56.735 | 42.051 | 1.00 | 62.88  | 1SG2373 |
| ATOM | 2373 | C   | ALA | 295 | 121.829 | 57.411 | 42.190 | 1.00 | 62.88  | 1SG2374 |
| ATOM | 2374 | O   | ALA | 295 | 121.427 | 58.069 | 43.147 | 1.00 | 62.88  | 1SG2375 |
| ATOM | 2375 | N   | ASP | 296 | 121.446 | 57.703 | 40.937 | 1.00 | 204.67 | 1SG2376 |
| ATOM | 2376 | CA  | ASP | 296 | 120.561 | 58.824 | 40.836 | 1.00 | 204.67 | 1SG2377 |
| ATOM | 2377 | CB  | ASP | 296 | 120.460 | 59.423 | 39.421 | 1.00 | 204.67 | 1SG2378 |
| ATOM | 2378 | CG  | ASP | 296 | 119.618 | 60.696 | 39.484 | 1.00 | 204.67 | 1SG2379 |
| ATOM | 2379 | OD1 | ASP | 296 | 118.479 | 60.647 | 40.020 | 1.00 | 204.67 | 1SG2380 |
| ATOM | 2380 | OD2 | ASP | 296 | 120.108 | 61.741 | 38.979 | 1.00 | 204.67 | 1SG2381 |
| ATOM | 2381 | C   | ASP | 296 | 119.223 | 58.290 | 41.198 | 1.00 | 204.67 | 1SG2382 |
| ATOM | 2382 | O   | ASP | 296 | 118.451 | 57.919 | 40.314 | 1.00 | 204.67 | 1SG2383 |
| ATOM | 2383 | N   | SER | 297 | 118.891 | 58.253 | 42.509 | 1.00 | 194.84 | 1SG2384 |
| ATOM | 2384 | CA  | SER | 297 | 117.650 | 57.602 | 42.777 | 1.00 | 194.84 | 1SG2385 |
| ATOM | 2385 | CB  | SER | 297 | 117.725 | 56.067 | 42.715 | 1.00 | 194.84 | 1SG2386 |
| ATOM | 2386 | OG  | SER | 297 | 118.024 | 55.625 | 41.400 | 1.00 | 194.84 | 1SG2387 |
| ATOM | 2387 | C   | SER | 297 | 117.049 | 57.902 | 44.110 | 1.00 | 194.84 | 1SG2388 |
| ATOM | 2388 | O   | SER | 297 | 117.291 | 58.912 | 44.767 | 1.00 | 194.84 | 1SG2389 |
| ATOM | 2389 | N   | SER | 298 | 116.198 | 56.932 | 44.493 | 1.00 | 107.55 | 1SG2390 |
| ATOM | 2390 | CA  | SER | 298 | 115.276 | 56.899 | 45.584 | 1.00 | 107.55 | 1SG2391 |
| ATOM | 2391 | CB  | SER | 298 | 114.199 | 55.826 | 45.392 | 1.00 | 107.55 | 1SG2392 |
| ATOM | 2392 | OG  | SER | 298 | 113.427 | 56.115 | 44.236 | 1.00 | 107.55 | 1SG2393 |
| ATOM | 2393 | C   | SER | 298 | 115.895 | 56.729 | 46.929 | 1.00 | 107.55 | 1SG2394 |
| ATOM | 2394 | O   | SER | 298 | 115.169 | 56.517 | 47.901 | 1.00 | 107.55 | 1SG2395 |
| ATOM | 2395 | N   | ILE | 299 | 117.232 | 56.763 | 47.046 | 1.00 | 102.92 | 1SG2396 |
| ATOM | 2396 | CA  | ILE | 299 | 117.727 | 56.653 | 48.383 | 1.00 | 102.92 | 1SG2397 |
| ATOM | 2397 | CB  | ILE | 299 | 119.234 | 56.607 | 48.433 | 1.00 | 102.92 | 1SG2398 |
| ATOM | 2398 | CG2 | ILE | 299 | 119.807 | 57.860 | 47.748 | 1.00 | 102.92 | 1SG2399 |
| ATOM | 2399 | CG1 | ILE | 299 | 119.724 | 56.373 | 49.871 | 1.00 | 102.92 | 1SG2400 |
| ATOM | 2400 | CD1 | ILE | 299 | 121.198 | 55.974 | 49.949 | 1.00 | 102.92 | 1SG2401 |
| ATOM | 2401 | C   | ILE | 299 | 117.214 | 57.843 | 49.142 | 1.00 | 102.92 | 1SG2402 |
| ATOM | 2402 | O   | ILE | 299 | 116.649 | 57.693 | 50.224 | 1.00 | 102.92 | 1SG2403 |
| ATOM | 2403 | N   | ALA | 300 | 117.407 | 59.064 | 48.604 | 1.00 | 48.29  | 1SG2404 |
| ATOM | 2404 | CA  | ALA | 300 | 116.891 | 60.251 | 49.225 | 1.00 | 48.29  | 1SG2405 |
| ATOM | 2405 | CB  | ALA | 300 | 117.510 | 61.535 | 48.647 | 1.00 | 48.29  | 1SG2406 |
| ATOM | 2406 | C   | ALA | 300 | 115.404 | 60.376 | 49.053 | 1.00 | 48.29  | 1SG2407 |
| ATOM | 2407 | O   | ALA | 300 | 114.674 | 60.620 | 50.014 | 1.00 | 48.29  | 1SG2408 |
| ATOM | 2408 | N   | SER | 301 | 114.923 | 60.185 | 47.806 | 1.00 | 51.61  | 1SG2409 |
| ATOM | 2409 | CA  | SER | 301 | 113.553 | 60.445 | 47.451 | 1.00 | 51.61  | 1SG2410 |
| ATOM | 2410 | CB  | SER | 301 | 113.287 | 60.319 | 45.940 | 1.00 | 51.61  | 1SG2411 |
| ATOM | 2411 | OG  | SER | 301 | 113.400 | 58.965 | 45.528 | 1.00 | 51.61  | 1SG2412 |
| ATOM | 2412 | C   | SER | 301 | 112.605 | 59.525 | 48.149 | 1.00 | 51.61  | 1SG2413 |

## Supplementary material 1.txt

|      |      |     |     |     |         |        |        |      |        |         |
|------|------|-----|-----|-----|---------|--------|--------|------|--------|---------|
| ATOM | 2413 | O   | SER | 301 | 111.603 | 59.971 | 48.706 | 1.00 | 51.61  | 1SG2414 |
| ATOM | 2414 | N   | LEU | 302 | 112.882 | 58.207 | 48.120 | 1.00 | 79.09  | 1SG2415 |
| ATOM | 2415 | CA  | LEU | 302 | 111.986 | 57.287 | 48.757 | 1.00 | 79.09  | 1SG2416 |
| ATOM | 2416 | CB  | LEU | 302 | 111.524 | 56.173 | 47.808 | 1.00 | 79.09  | 1SG2417 |
| ATOM | 2417 | CG  | LEU | 302 | 110.741 | 56.726 | 46.602 | 1.00 | 79.09  | 1SG2418 |
| ATOM | 2418 | CD2 | LEU | 302 | 109.585 | 57.629 | 47.060 | 1.00 | 79.09  | 1SG2419 |
| ATOM | 2419 | CD1 | LEU | 302 | 110.281 | 55.600 | 45.666 | 1.00 | 79.09  | 1SG2420 |
| ATOM | 2420 | C   | LEU | 302 | 112.724 | 56.657 | 49.895 | 1.00 | 79.09  | 1SG2421 |
| ATOM | 2421 | O   | LEU | 302 | 113.286 | 55.569 | 49.770 | 1.00 | 79.09  | 1SG2422 |
| ATOM | 2422 | N   | ASN | 303 | 112.682 | 57.335 | 51.056 | 1.00 | 98.49  | 1SG2423 |
| ATOM | 2423 | CA  | ASN | 303 | 113.381 | 56.967 | 52.253 | 1.00 | 98.49  | 1SG2424 |
| ATOM | 2424 | CB  | ASN | 303 | 113.278 | 58.038 | 53.351 | 1.00 | 98.49  | 1SG2425 |
| ATOM | 2425 | CG  | ASN | 303 | 111.814 | 58.154 | 53.750 | 1.00 | 98.49  | 1SG2426 |
| ATOM | 2426 | OD1 | ASN | 303 | 110.923 | 58.091 | 52.905 | 1.00 | 98.49  | 1SG2427 |
| ATOM | 2427 | ND2 | ASN | 303 | 111.553 | 58.326 | 55.074 | 1.00 | 98.49  | 1SG2428 |
| ATOM | 2428 | C   | ASN | 303 | 112.817 | 55.705 | 52.820 | 1.00 | 98.49  | 1SG2429 |
| ATOM | 2429 | O   | ASN | 303 | 113.527 | 54.952 | 53.482 | 1.00 | 98.49  | 1SG2430 |
| ATOM | 2430 | N   | PHE | 304 | 111.514 | 55.459 | 52.589 | 1.00 | 89.38  | 1SG2431 |
| ATOM | 2431 | CA  | PHE | 304 | 110.818 | 54.351 | 53.171 | 1.00 | 89.38  | 1SG2432 |
| ATOM | 2432 | CB  | PHE | 304 | 109.286 | 54.407 | 52.990 | 1.00 | 89.38  | 1SG2433 |
| ATOM | 2433 | CG  | PHE | 304 | 108.918 | 54.419 | 51.548 | 1.00 | 89.38  | 1SG2434 |
| ATOM | 2434 | CD1 | PHE | 304 | 108.926 | 55.597 | 50.837 | 1.00 | 89.38  | 1SG2435 |
| ATOM | 2435 | CD2 | PHE | 304 | 108.542 | 53.259 | 50.911 | 1.00 | 89.38  | 1SG2436 |
| ATOM | 2436 | CE1 | PHE | 304 | 108.576 | 55.613 | 49.508 | 1.00 | 89.38  | 1SG2437 |
| ATOM | 2437 | CE2 | PHE | 304 | 108.191 | 53.271 | 49.582 | 1.00 | 89.38  | 1SG2438 |
| ATOM | 2438 | CZ  | PHE | 304 | 108.210 | 54.449 | 48.877 | 1.00 | 89.38  | 1SG2439 |
| ATOM | 2439 | C   | PHE | 304 | 111.337 | 53.032 | 52.685 | 1.00 | 89.38  | 1SG2440 |
| ATOM | 2440 | O   | PHE | 304 | 111.301 | 52.056 | 53.433 | 1.00 | 89.38  | 1SG2441 |
| ATOM | 2441 | N   | TYR | 305 | 111.855 | 52.929 | 51.445 | 1.00 | 169.12 | 1SG2442 |
| ATOM | 2442 | CA  | TYR | 305 | 112.187 | 51.594 | 51.025 | 1.00 | 169.12 | 1SG2443 |
| ATOM | 2443 | CB  | TYR | 305 | 111.799 | 51.243 | 49.573 | 1.00 | 169.12 | 1SG2444 |
| ATOM | 2444 | CG  | TYR | 305 | 112.738 | 51.848 | 48.601 | 1.00 | 169.12 | 1SG2445 |
| ATOM | 2445 | CD1 | TYR | 305 | 113.869 | 51.155 | 48.258 | 1.00 | 169.12 | 1SG2446 |
| ATOM | 2446 | CD2 | TYR | 305 | 112.496 | 53.072 | 48.026 | 1.00 | 169.12 | 1SG2447 |
| ATOM | 2447 | CE1 | TYR | 305 | 114.767 | 51.665 | 47.359 | 1.00 | 169.12 | 1SG2448 |
| ATOM | 2448 | CE2 | TYR | 305 | 113.393 | 53.590 | 47.122 | 1.00 | 169.12 | 1SG2449 |
| ATOM | 2449 | CZ  | TYR | 305 | 114.529 | 52.887 | 46.788 | 1.00 | 169.12 | 1SG2450 |
| ATOM | 2450 | OH  | TYR | 305 | 115.463 | 53.398 | 45.863 | 1.00 | 169.12 | 1SG2451 |
| ATOM | 2451 | C   | TYR | 305 | 113.636 | 51.283 | 51.279 | 1.00 | 169.12 | 1SG2452 |
| ATOM | 2452 | O   | TYR | 305 | 114.395 | 52.118 | 51.769 | 1.00 | 169.12 | 1SG2453 |
| ATOM | 2453 | N   | ARG | 306 | 114.018 | 50.007 | 51.046 | 1.00 | 106.43 | 1SG2454 |
| ATOM | 2454 | CA  | ARG | 306 | 115.326 | 49.502 | 51.387 | 1.00 | 106.43 | 1SG2455 |
| ATOM | 2455 | CB  | ARG | 306 | 115.308 | 47.996 | 51.701 | 1.00 | 106.43 | 1SG2456 |
| ATOM | 2456 | CG  | ARG | 306 | 114.496 | 47.649 | 52.950 | 1.00 | 106.43 | 1SG2457 |
| ATOM | 2457 | CD  | ARG | 306 | 114.295 | 46.147 | 53.154 | 1.00 | 106.43 | 1SG2458 |
| ATOM | 2458 | NE  | ARG | 306 | 113.407 | 45.667 | 52.058 | 1.00 | 106.43 | 1SG2459 |
| ATOM | 2459 | CZ  | ARG | 306 | 112.671 | 44.531 | 52.234 | 1.00 | 106.43 | 1SG2460 |
| ATOM | 2460 | NH1 | ARG | 306 | 112.764 | 43.841 | 53.408 | 1.00 | 106.43 | 1SG2461 |
| ATOM | 2461 | NH2 | ARG | 306 | 111.841 | 44.088 | 51.245 | 1.00 | 106.43 | 1SG2462 |
| ATOM | 2462 | C   | ARG | 306 | 116.325 | 49.714 | 50.282 | 1.00 | 106.43 | 1SG2463 |
| ATOM | 2463 | O   | ARG | 306 | 115.991 | 49.654 | 49.102 | 1.00 | 106.43 | 1SG2464 |
| ATOM | 2464 | N   | LYS | 307 | 117.607 | 49.954 | 50.654 | 1.00 | 124.52 | 1SG2465 |
| ATOM | 2465 | CA  | LYS | 307 | 118.645 | 50.166 | 49.674 | 1.00 | 124.52 | 1SG2466 |
| ATOM | 2466 | CB  | LYS | 307 | 119.561 | 51.343 | 50.032 | 1.00 | 124.52 | 1SG2467 |
| ATOM | 2467 | CG  | LYS | 307 | 118.846 | 52.674 | 50.257 | 1.00 | 124.52 | 1SG2468 |
| ATOM | 2468 | CD  | LYS | 307 | 119.686 | 53.678 | 51.055 | 1.00 | 124.52 | 1SG2469 |
| ATOM | 2469 | CE  | LYS | 307 | 119.736 | 53.360 | 52.554 | 1.00 | 124.52 | 1SG2470 |
| ATOM | 2470 | NZ  | LYS | 307 | 120.564 | 54.357 | 53.266 | 1.00 | 124.52 | 1SG2471 |
| ATOM | 2471 | C   | LYS | 307 | 119.519 | 48.930 | 49.618 | 1.00 | 124.52 | 1SG2472 |
| ATOM | 2472 | O   | LYS | 307 | 120.626 | 48.882 | 50.146 | 1.00 | 124.52 | 1SG2473 |
| ATOM | 2473 | N   | CYS | 308 | 118.964 | 47.863 | 49.035 | 1.00 | 190.41 | 1SG2474 |
| ATOM | 2474 | CA  | CYS | 308 | 119.456 | 46.533 | 48.781 | 1.00 | 190.41 | 1SG2475 |
| ATOM | 2475 | CB  | CYS | 308 | 118.356 | 45.497 | 49.002 | 1.00 | 190.41 | 1SG2476 |
| ATOM | 2476 | SG  | CYS | 308 | 116.770 | 46.199 | 48.488 | 1.00 | 190.41 | 1SG2477 |
| ATOM | 2477 | C   | CYS | 308 | 120.100 | 46.292 | 47.437 | 1.00 | 190.41 | 1SG2478 |
| ATOM | 2478 | O   | CYS | 308 | 120.135 | 45.142 | 47.006 | 1.00 | 190.41 | 1SG2479 |
| ATOM | 2479 | N   | TYR | 309 | 120.505 | 47.314 | 46.665 | 1.00 | 125.47 | 1SG2480 |
| ATOM | 2480 | CA  | TYR | 309 | 120.895 | 47.063 | 45.297 | 1.00 | 125.47 | 1SG2481 |
| ATOM | 2481 | CB  | TYR | 309 | 121.333 | 48.338 | 44.559 | 1.00 | 125.47 | 1SG2482 |
| ATOM | 2482 | CG  | TYR | 309 | 121.122 | 48.073 | 43.107 | 1.00 | 125.47 | 1SG2483 |
| ATOM | 2483 | CD1 | TYR | 309 | 121.939 | 47.228 | 42.398 | 1.00 | 125.47 | 1SG2484 |

## Supplementary material 1.txt

|      |      |     |     |     |         |        |        |            |         |
|------|------|-----|-----|-----|---------|--------|--------|------------|---------|
| ATOM | 2484 | CD2 | TYR | 309 | 120.083 | 48.690 | 42.451 | 1.00125.47 | 1SG2485 |
| ATOM | 2485 | CE1 | TYR | 309 | 121.722 | 46.998 | 41.058 | 1.00125.47 | 1SG2486 |
| ATOM | 2486 | CE2 | TYR | 309 | 119.858 | 48.467 | 41.115 | 1.00125.47 | 1SG2487 |
| ATOM | 2487 | CZ  | TYR | 309 | 120.678 | 47.619 | 40.414 | 1.00125.47 | 1SG2488 |
| ATOM | 2488 | OH  | TYR | 309 | 120.447 | 47.389 | 39.041 | 1.00125.47 | 1SG2489 |
| ATOM | 2489 | C   | TYR | 309 | 122.017 | 46.054 | 45.199 | 1.00125.47 | 1SG2490 |
| ATOM | 2490 | O   | TYR | 309 | 122.031 | 45.236 | 44.277 | 1.00125.47 | 1SG2491 |
| ATOM | 2491 | N   | VAL | 310 | 123.014 | 46.099 | 46.106 | 1.00 52.63 | 1SG2492 |
| ATOM | 2492 | CA  | VAL | 310 | 124.107 | 45.161 | 46.052 | 1.00 52.63 | 1SG2493 |
| ATOM | 2493 | CB  | VAL | 310 | 125.159 | 45.438 | 47.088 | 1.00 52.63 | 1SG2494 |
| ATOM | 2494 | CG1 | VAL | 310 | 126.264 | 44.371 | 46.973 | 1.00 52.63 | 1SG2495 |
| ATOM | 2495 | CG2 | VAL | 310 | 125.659 | 46.880 | 46.900 | 1.00 52.63 | 1SG2496 |
| ATOM | 2496 | C   | VAL | 310 | 123.582 | 43.775 | 46.292 | 1.00 52.63 | 1SG2497 |
| ATOM | 2497 | O   | VAL | 310 | 123.964 | 42.820 | 45.616 | 1.00 52.63 | 1SG2498 |
| ATOM | 2498 | N   | GLU | 311 | 122.670 | 43.648 | 47.271 | 1.00 93.72 | 1SG2499 |
| ATOM | 2499 | CA  | GLU | 311 | 122.082 | 42.396 | 47.653 | 1.00 93.72 | 1SG2500 |
| ATOM | 2500 | CB  | GLU | 311 | 121.097 | 42.545 | 48.829 | 1.00 93.72 | 1SG2501 |
| ATOM | 2501 | CG  | GLU | 311 | 121.778 | 42.831 | 50.172 | 1.00 93.72 | 1SG2502 |
| ATOM | 2502 | CD  | GLU | 311 | 122.215 | 44.291 | 50.233 | 1.00 93.72 | 1SG2503 |
| ATOM | 2503 | OE1 | GLU | 311 | 121.851 | 45.068 | 49.312 | 1.00 93.72 | 1SG2504 |
| ATOM | 2504 | OE2 | GLU | 311 | 122.919 | 44.649 | 51.214 | 1.00 93.72 | 1SG2505 |
| ATOM | 2505 | C   | GLU | 311 | 121.327 | 41.840 | 46.482 | 1.00 93.72 | 1SG2506 |
| ATOM | 2506 | O   | GLU | 311 | 121.324 | 40.630 | 46.260 | 1.00 93.72 | 1SG2507 |
| ATOM | 2507 | N   | PHE | 312 | 120.655 | 42.712 | 45.704 | 1.00110.05 | 1SG2508 |
| ATOM | 2508 | CA  | PHE | 312 | 119.928 | 42.271 | 44.545 | 1.00110.05 | 1SG2509 |
| ATOM | 2509 | CB  | PHE | 312 | 119.090 | 43.333 | 43.814 | 1.00110.05 | 1SG2510 |
| ATOM | 2510 | CG  | PHE | 312 | 117.811 | 43.580 | 44.538 | 1.00110.05 | 1SG2511 |
| ATOM | 2511 | CD1 | PHE | 312 | 116.925 | 42.551 | 44.759 | 1.00110.05 | 1SG2512 |
| ATOM | 2512 | CD2 | PHE | 312 | 117.507 | 44.824 | 45.029 | 1.00110.05 | 1SG2513 |
| ATOM | 2513 | CE1 | PHE | 312 | 115.737 | 42.764 | 45.416 | 1.00110.05 | 1SG2514 |
| ATOM | 2514 | CE2 | PHE | 312 | 116.319 | 45.043 | 45.686 | 1.00110.05 | 1SG2515 |
| ATOM | 2515 | CZ  | PHE | 312 | 115.426 | 44.018 | 45.881 | 1.00110.05 | 1SG2516 |
| ATOM | 2516 | C   | PHE | 312 | 120.886 | 41.737 | 43.532 | 1.00110.05 | 1SG2517 |
| ATOM | 2517 | O   | PHE | 312 | 120.547 | 40.840 | 42.762 | 1.00110.05 | 1SG2518 |
| ATOM | 2518 | N   | TYR | 313 | 122.088 | 42.330 | 43.453 | 1.00 78.18 | 1SG2519 |
| ATOM | 2519 | CA  | TYR | 313 | 123.082 | 41.883 | 42.522 | 1.00 78.18 | 1SG2520 |
| ATOM | 2520 | CB  | TYR | 313 | 124.324 | 42.792 | 42.495 | 1.00 78.18 | 1SG2521 |
| ATOM | 2521 | CG  | TYR | 313 | 125.349 | 42.071 | 41.696 | 1.00 78.18 | 1SG2522 |
| ATOM | 2522 | CD1 | TYR | 313 | 125.312 | 42.077 | 40.321 | 1.00 78.18 | 1SG2523 |
| ATOM | 2523 | CD2 | TYR | 313 | 126.350 | 41.382 | 42.338 | 1.00 78.18 | 1SG2524 |
| ATOM | 2524 | CE1 | TYR | 313 | 126.264 | 41.396 | 39.603 | 1.00 78.18 | 1SG2525 |
| ATOM | 2525 | CE2 | TYR | 313 | 127.305 | 40.699 | 41.628 | 1.00 78.18 | 1SG2526 |
| ATOM | 2526 | CZ  | TYR | 313 | 127.257 | 40.707 | 40.257 | 1.00 78.18 | 1SG2527 |
| ATOM | 2527 | OH  | TYR | 313 | 128.229 | 40.008 | 39.515 | 1.00 78.18 | 1SG2528 |
| ATOM | 2528 | C   | TYR | 313 | 123.504 | 40.488 | 42.880 | 1.00 78.18 | 1SG2529 |
| ATOM | 2529 | O   | TYR | 313 | 123.698 | 39.647 | 42.003 | 1.00 78.18 | 1SG2530 |
| ATOM | 2530 | N   | PHE | 314 | 123.654 | 40.203 | 44.188 | 1.00 45.78 | 1SG2531 |
| ATOM | 2531 | CA  | PHE | 314 | 124.050 | 38.899 | 44.637 | 1.00 45.78 | 1SG2532 |
| ATOM | 2532 | CB  | PHE | 314 | 124.159 | 38.796 | 46.167 | 1.00 45.78 | 1SG2533 |
| ATOM | 2533 | CG  | PHE | 314 | 124.548 | 37.392 | 46.484 | 1.00 45.78 | 1SG2534 |
| ATOM | 2534 | CD1 | PHE | 314 | 125.861 | 36.988 | 46.397 | 1.00 45.78 | 1SG2535 |
| ATOM | 2535 | CD2 | PHE | 314 | 123.595 | 36.479 | 46.871 | 1.00 45.78 | 1SG2536 |
| ATOM | 2536 | CE1 | PHE | 314 | 126.215 | 35.692 | 46.691 | 1.00 45.78 | 1SG2537 |
| ATOM | 2537 | CE2 | PHE | 314 | 123.943 | 35.182 | 47.166 | 1.00 45.78 | 1SG2538 |
| ATOM | 2538 | CZ  | PHE | 314 | 125.256 | 34.786 | 47.075 | 1.00 45.78 | 1SG2539 |
| ATOM | 2539 | C   | PHE | 314 | 123.013 | 37.912 | 44.204 | 1.00 45.78 | 1SG2540 |
| ATOM | 2540 | O   | PHE | 314 | 123.338 | 36.807 | 43.773 | 1.00 45.78 | 1SG2541 |
| ATOM | 2541 | N   | TRP | 315 | 121.728 | 38.295 | 44.308 | 1.00 68.75 | 1SG2542 |
| ATOM | 2542 | CA  | TRP | 315 | 120.639 | 37.419 | 43.987 | 1.00 68.75 | 1SG2543 |
| ATOM | 2543 | CB  | TRP | 315 | 119.276 | 38.088 | 44.222 | 1.00 68.75 | 1SG2544 |
| ATOM | 2544 | CG  | TRP | 315 | 118.139 | 37.118 | 44.423 | 1.00 68.75 | 1SG2545 |
| ATOM | 2545 | CD2 | TRP | 315 | 117.719 | 36.712 | 45.732 | 1.00 68.75 | 1SG2546 |
| ATOM | 2546 | CD1 | TRP | 315 | 117.323 | 36.480 | 43.535 | 1.00 68.75 | 1SG2547 |
| ATOM | 2547 | NE1 | TRP | 315 | 116.423 | 35.690 | 44.215 | 1.00 68.75 | 1SG2548 |
| ATOM | 2548 | CE2 | TRP | 315 | 116.654 | 35.827 | 45.569 | 1.00 68.75 | 1SG2549 |
| ATOM | 2549 | CE3 | TRP | 315 | 118.183 | 37.052 | 46.971 | 1.00 68.75 | 1SG2550 |
| ATOM | 2550 | CZ2 | TRP | 315 | 116.039 | 35.265 | 46.652 | 1.00 68.75 | 1SG2551 |
| ATOM | 2551 | CZ3 | TRP | 315 | 117.560 | 36.486 | 48.060 | 1.00 68.75 | 1SG2552 |
| ATOM | 2552 | CH2 | TRP | 315 | 116.507 | 35.608 | 47.903 | 1.00 68.75 | 1SG2553 |
| ATOM | 2553 | C   | TRP | 315 | 120.740 | 37.074 | 42.529 | 1.00 68.75 | 1SG2554 |
| ATOM | 2554 | O   | TRP | 315 | 120.519 | 35.934 | 42.123 | 1.00 68.75 | 1SG2555 |

## Supplementary material 1.txt

|      |      |     |     |     |         |        |        |            |         |
|------|------|-----|-----|-----|---------|--------|--------|------------|---------|
| ATOM | 2555 | N   | MET | 316 | 121.071 | 38.082 | 41.704 | 1.00168.94 | 1SG2556 |
| ATOM | 2556 | CA  | MET | 316 | 121.224 | 37.948 | 40.285 | 1.00168.94 | 1SG2557 |
| ATOM | 2557 | CB  | MET | 316 | 121.725 | 39.236 | 39.650 | 1.00168.94 | 1SG2558 |
| ATOM | 2558 | CG  | MET | 316 | 122.001 | 38.967 | 38.187 | 1.00168.94 | 1SG2559 |
| ATOM | 2559 | SD  | MET | 316 | 120.423 | 38.541 | 37.462 | 1.00168.94 | 1SG2560 |
| ATOM | 2560 | CE  | MET | 316 | 119.971 | 39.943 | 38.516 | 1.00168.94 | 1SG2561 |
| ATOM | 2561 | C   | MET | 316 | 122.349 | 37.024 | 39.976 | 1.00168.94 | 1SG2562 |
| ATOM | 2562 | O   | MET | 316 | 122.281 | 36.235 | 39.035 | 1.00168.94 | 1SG2563 |
| ATOM | 2563 | N   | ALA | 317 | 123.445 | 37.180 | 40.735 | 1.00 42.48 | 1SG2564 |
| ATOM | 2564 | CA  | ALA | 317 | 124.649 | 36.430 | 40.557 | 1.00 42.48 | 1SG2565 |
| ATOM | 2565 | CB  | ALA | 317 | 125.770 | 36.882 | 41.505 | 1.00 42.48 | 1SG2566 |
| ATOM | 2566 | C   | ALA | 317 | 124.369 | 34.995 | 40.852 | 1.00 42.48 | 1SG2567 |
| ATOM | 2567 | O   | ALA | 317 | 124.948 | 34.097 | 40.244 | 1.00 42.48 | 1SG2568 |
| ATOM | 2568 | N   | ALA | 318 | 123.499 | 34.752 | 41.845 | 1.00 41.94 | 1SG2569 |
| ATOM | 2569 | CA  | ALA | 318 | 123.158 | 33.418 | 42.243 | 1.00 41.94 | 1SG2570 |
| ATOM | 2570 | CB  | ALA | 318 | 122.199 | 33.386 | 43.446 | 1.00 41.94 | 1SG2571 |
| ATOM | 2571 | C   | ALA | 318 | 122.476 | 32.720 | 41.108 | 1.00 41.94 | 1SG2572 |
| ATOM | 2572 | O   | ALA | 318 | 122.702 | 31.529 | 40.890 | 1.00 41.94 | 1SG2573 |
| ATOM | 2573 | N   | ALA | 319 | 121.603 | 33.446 | 40.377 | 1.00 54.22 | 1SG2574 |
| ATOM | 2574 | CA  | ALA | 319 | 120.842 | 32.879 | 39.300 | 1.00 54.22 | 1SG2575 |
| ATOM | 2575 | CB  | ALA | 319 | 119.862 | 33.890 | 38.680 | 1.00 54.22 | 1SG2576 |
| ATOM | 2576 | C   | ALA | 319 | 121.761 | 32.411 | 38.211 | 1.00 54.22 | 1SG2577 |
| ATOM | 2577 | O   | ALA | 319 | 121.597 | 31.297 | 37.712 | 1.00 54.22 | 1SG2578 |
| ATOM | 2578 | N   | ILE | 320 | 122.732 | 33.257 | 37.795 | 1.00124.57 | 1SG2579 |
| ATOM | 2579 | CA  | ILE | 320 | 123.686 | 32.861 | 36.792 | 1.00124.57 | 1SG2580 |
| ATOM | 2580 | CB  | ILE | 320 | 123.207 | 33.084 | 35.390 | 1.00124.57 | 1SG2581 |
| ATOM | 2581 | CG2 | ILE | 320 | 124.408 | 32.849 | 34.463 | 1.00124.57 | 1SG2582 |
| ATOM | 2582 | CG1 | ILE | 320 | 121.993 | 32.196 | 35.070 | 1.00124.57 | 1SG2583 |
| ATOM | 2583 | CD1 | ILE | 320 | 122.299 | 30.700 | 35.128 | 1.00124.57 | 1SG2584 |
| ATOM | 2584 | C   | ILE | 320 | 124.929 | 33.690 | 36.942 | 1.00124.57 | 1SG2585 |
| ATOM | 2585 | O   | ILE | 320 | 124.850 | 34.904 | 37.122 | 1.00124.57 | 1SG2586 |
| ATOM | 2586 | N   | SER | 321 | 126.107 | 33.029 | 36.961 | 1.00119.54 | 1SG2587 |
| ATOM | 2587 | CA  | SER | 321 | 127.393 | 33.673 | 37.039 | 1.00119.54 | 1SG2588 |
| ATOM | 2588 | CB  | SER | 321 | 128.363 | 32.916 | 37.962 | 1.00119.54 | 1SG2589 |
| ATOM | 2589 | OG  | SER | 321 | 129.616 | 33.583 | 38.008 | 1.00119.54 | 1SG2590 |
| ATOM | 2590 | C   | SER | 321 | 128.092 | 33.830 | 35.709 | 1.00119.54 | 1SG2591 |
| ATOM | 2591 | O   | SER | 321 | 128.942 | 34.708 | 35.566 | 1.00119.54 | 1SG2592 |
| ATOM | 2592 | N   | GLU | 322 | 127.781 | 32.983 | 34.701 | 1.00147.31 | 1SG2593 |
| ATOM | 2593 | CA  | GLU | 322 | 128.586 | 32.975 | 33.504 | 1.00147.31 | 1SG2594 |
| ATOM | 2594 | CB  | GLU | 322 | 128.333 | 31.795 | 32.544 | 1.00147.31 | 1SG2595 |
| ATOM | 2595 | CG  | GLU | 322 | 126.880 | 31.537 | 32.167 | 1.00147.31 | 1SG2596 |
| ATOM | 2596 | CD  | GLU | 322 | 126.324 | 30.524 | 33.159 | 1.00147.31 | 1SG2597 |
| ATOM | 2597 | OE1 | GLU | 322 | 126.288 | 30.847 | 34.376 | 1.00147.31 | 1SG2598 |
| ATOM | 2598 | OE2 | GLU | 322 | 125.934 | 29.412 | 32.714 | 1.00147.31 | 1SG2599 |
| ATOM | 2599 | C   | GLU | 322 | 128.488 | 34.261 | 32.747 | 1.00147.31 | 1SG2600 |
| ATOM | 2600 | O   | GLU | 322 | 127.457 | 34.925 | 32.704 | 1.00147.31 | 1SG2601 |
| ATOM | 2601 | N   | PRO | 323 | 129.597 | 34.603 | 32.140 | 1.00 67.69 | 1SG2602 |
| ATOM | 2602 | CA  | PRO | 323 | 129.787 | 35.841 | 31.428 | 1.00 67.69 | 1SG2603 |
| ATOM | 2603 | CD  | PRO | 323 | 130.639 | 33.632 | 31.847 | 1.00 67.69 | 1SG2604 |
| ATOM | 2604 | CB  | PRO | 323 | 131.219 | 35.783 | 30.896 | 1.00 67.69 | 1SG2605 |
| ATOM | 2605 | CG  | PRO | 323 | 131.480 | 34.276 | 30.733 | 1.00 67.69 | 1SG2606 |
| ATOM | 2606 | C   | PRO | 323 | 128.793 | 36.076 | 30.327 | 1.00 67.69 | 1SG2607 |
| ATOM | 2607 | O   | PRO | 323 | 128.540 | 37.237 | 30.010 | 1.00 67.69 | 1SG2608 |
| ATOM | 2608 | N   | GLU | 324 | 128.234 | 35.014 | 29.717 | 1.00 95.01 | 1SG2609 |
| ATOM | 2609 | CA  | GLU | 324 | 127.300 | 35.160 | 28.631 | 1.00 95.01 | 1SG2610 |
| ATOM | 2610 | CB  | GLU | 324 | 126.831 | 33.811 | 28.065 | 1.00 95.01 | 1SG2611 |
| ATOM | 2611 | CG  | GLU | 324 | 127.945 | 33.008 | 27.395 | 1.00 95.01 | 1SG2612 |
| ATOM | 2612 | CD  | GLU | 324 | 128.821 | 32.394 | 28.476 | 1.00 95.01 | 1SG2613 |
| ATOM | 2613 | OE1 | GLU | 324 | 128.427 | 31.327 | 29.021 | 1.00 95.01 | 1SG2614 |
| ATOM | 2614 | OE2 | GLU | 324 | 129.894 | 32.983 | 28.773 | 1.00 95.01 | 1SG2615 |
| ATOM | 2615 | C   | GLU | 324 | 126.073 | 35.852 | 29.143 | 1.00 95.01 | 1SG2616 |
| ATOM | 2616 | O   | GLU | 324 | 125.401 | 36.589 | 28.423 | 1.00 95.01 | 1SG2617 |
| ATOM | 2617 | N   | PHE | 325 | 125.759 | 35.579 | 30.415 | 1.00131.48 | 1SG2618 |
| ATOM | 2618 | CA  | PHE | 325 | 124.635 | 36.029 | 31.186 | 1.00131.48 | 1SG2619 |
| ATOM | 2619 | CB  | PHE | 325 | 124.288 | 35.112 | 32.367 | 1.00131.48 | 1SG2620 |
| ATOM | 2620 | CG  | PHE | 325 | 123.618 | 33.944 | 31.725 | 1.00131.48 | 1SG2621 |
| ATOM | 2621 | CD1 | PHE | 325 | 122.311 | 34.046 | 31.314 | 1.00131.48 | 1SG2622 |
| ATOM | 2622 | CD2 | PHE | 325 | 124.279 | 32.756 | 31.522 | 1.00131.48 | 1SG2623 |
| ATOM | 2623 | CE1 | PHE | 325 | 121.675 | 32.984 | 30.716 | 1.00131.48 | 1SG2624 |
| ATOM | 2624 | CE2 | PHE | 325 | 123.650 | 31.688 | 30.924 | 1.00131.48 | 1SG2625 |
| ATOM | 2625 | CZ  | PHE | 325 | 122.342 | 31.800 | 30.520 | 1.00131.48 | 1SG2626 |

## Supplementary material 1.txt

|      |      |     |     |     |         |        |        |            |         |
|------|------|-----|-----|-----|---------|--------|--------|------------|---------|
| ATOM | 2626 | C   | PHE | 325 | 124.752 | 37.457 | 31.635 | 1.00131.48 | 1SG2627 |
| ATOM | 2627 | O   | PHE | 325 | 123.896 | 37.938 | 32.374 | 1.00131.48 | 1SG2628 |
| ATOM | 2628 | N   | SER | 326 | 125.863 | 38.145 | 31.325 | 1.00 62.12 | 1SG2629 |
| ATOM | 2629 | CA  | SER | 326 | 126.058 | 39.478 | 31.831 | 1.00 62.12 | 1SG2630 |
| ATOM | 2630 | CB  | SER | 326 | 127.313 | 40.162 | 31.261 | 1.00 62.12 | 1SG2631 |
| ATOM | 2631 | OG  | SER | 326 | 127.450 | 41.464 | 31.813 | 1.00 62.12 | 1SG2632 |
| ATOM | 2632 | C   | SER | 326 | 124.876 | 40.370 | 31.551 | 1.00 62.12 | 1SG2633 |
| ATOM | 2633 | O   | SER | 326 | 124.413 | 41.063 | 32.456 | 1.00 62.12 | 1SG2634 |
| ATOM | 2634 | N   | GLY | 327 | 124.337 | 40.387 | 30.314 | 1.00 28.56 | 1SG2635 |
| ATOM | 2635 | CA  | GLY | 327 | 123.226 | 41.254 | 30.022 | 1.00 28.56 | 1SG2636 |
| ATOM | 2636 | C   | GLY | 327 | 122.058 | 40.862 | 30.881 | 1.00 28.56 | 1SG2637 |
| ATOM | 2637 | O   | GLY | 327 | 121.319 | 41.720 | 31.363 | 1.00 28.56 | 1SG2638 |
| ATOM | 2638 | N   | SER | 328 | 121.855 | 39.543 | 31.068 | 1.00 83.55 | 1SG2639 |
| ATOM | 2639 | CA  | SER | 328 | 120.758 | 38.997 | 31.824 | 1.00 83.55 | 1SG2640 |
| ATOM | 2640 | CB  | SER | 328 | 120.736 | 37.460 | 31.814 | 1.00 83.55 | 1SG2641 |
| ATOM | 2641 | OG  | SER | 328 | 119.634 | 36.986 | 32.573 | 1.00 83.55 | 1SG2642 |
| ATOM | 2642 | C   | SER | 328 | 120.820 | 39.432 | 33.238 | 1.00 83.55 | 1SG2643 |
| ATOM | 2643 | O   | SER | 328 | 119.815 | 39.852 | 33.808 | 1.00 83.55 | 1SG2644 |
| ATOM | 2644 | N   | ARG | 329 | 122.013 | 39.346 | 33.832 | 1.00 60.45 | 1SG2645 |
| ATOM | 2645 | CA  | ARG | 329 | 122.157 | 39.668 | 35.214 | 1.00 60.45 | 1SG2646 |
| ATOM | 2646 | CB  | ARG | 329 | 123.578 | 39.419 | 35.745 | 1.00 60.45 | 1SG2647 |
| ATOM | 2647 | CG  | ARG | 329 | 123.910 | 37.929 | 35.848 | 1.00 60.45 | 1SG2648 |
| ATOM | 2648 | CD  | ARG | 329 | 125.148 | 37.635 | 36.693 | 1.00 60.45 | 1SG2649 |
| ATOM | 2649 | NE  | ARG | 329 | 126.306 | 38.269 | 36.009 | 1.00 60.45 | 1SG2650 |
| ATOM | 2650 | CZ  | ARG | 329 | 127.076 | 37.556 | 35.141 | 1.00 60.45 | 1SG2651 |
| ATOM | 2651 | NH1 | ARG | 329 | 126.780 | 36.249 | 34.901 | 1.00 60.45 | 1SG2652 |
| ATOM | 2652 | NH2 | ARG | 329 | 128.141 | 38.150 | 34.525 | 1.00 60.45 | 1SG2653 |
| ATOM | 2653 | C   | ARG | 329 | 121.815 | 41.101 | 35.450 | 1.00 60.45 | 1SG2654 |
| ATOM | 2654 | O   | ARG | 329 | 121.072 | 41.419 | 36.377 | 1.00 60.45 | 1SG2655 |
| ATOM | 2655 | N   | VAL | 330 | 122.315 | 42.003 | 34.589 | 1.00 38.19 | 1SG2656 |
| ATOM | 2656 | CA  | VAL | 330 | 122.112 | 43.406 | 34.792 | 1.00 38.19 | 1SG2657 |
| ATOM | 2657 | CB  | VAL | 330 | 122.789 | 44.238 | 33.744 | 1.00 38.19 | 1SG2658 |
| ATOM | 2658 | CG1 | VAL | 330 | 122.455 | 45.715 | 34.004 | 1.00 38.19 | 1SG2659 |
| ATOM | 2659 | CG2 | VAL | 330 | 124.298 | 43.937 | 33.788 | 1.00 38.19 | 1SG2660 |
| ATOM | 2660 | C   | VAL | 330 | 120.646 | 43.713 | 34.766 | 1.00 38.19 | 1SG2661 |
| ATOM | 2661 | O   | VAL | 330 | 120.146 | 44.443 | 35.620 | 1.00 38.19 | 1SG2662 |
| ATOM | 2662 | N   | ALA | 331 | 119.909 | 43.154 | 33.789 | 1.00 37.35 | 1SG2663 |
| ATOM | 2663 | CA  | ALA | 331 | 118.506 | 43.437 | 33.685 | 1.00 37.35 | 1SG2664 |
| ATOM | 2664 | CB  | ALA | 331 | 117.839 | 42.770 | 32.474 | 1.00 37.35 | 1SG2665 |
| ATOM | 2665 | C   | ALA | 331 | 117.798 | 42.937 | 34.906 | 1.00 37.35 | 1SG2666 |
| ATOM | 2666 | O   | ALA | 331 | 116.939 | 43.623 | 35.456 | 1.00 37.35 | 1SG2667 |
| ATOM | 2667 | N   | PHE | 332 | 118.145 | 41.725 | 35.376 | 1.00120.31 | 1SG2668 |
| ATOM | 2668 | CA  | PHE | 332 | 117.442 | 41.174 | 36.497 | 1.00120.31 | 1SG2669 |
| ATOM | 2669 | CB  | PHE | 332 | 117.686 | 39.671 | 36.717 | 1.00120.31 | 1SG2670 |
| ATOM | 2670 | CG  | PHE | 332 | 116.841 | 39.188 | 37.854 | 1.00120.31 | 1SG2671 |
| ATOM | 2671 | CD1 | PHE | 332 | 117.153 | 39.443 | 39.173 | 1.00120.31 | 1SG2672 |
| ATOM | 2672 | CD2 | PHE | 332 | 115.717 | 38.445 | 37.594 | 1.00120.31 | 1SG2673 |
| ATOM | 2673 | CE1 | PHE | 332 | 116.365 | 38.987 | 40.204 | 1.00120.31 | 1SG2674 |
| ATOM | 2674 | CE2 | PHE | 332 | 114.922 | 37.984 | 38.617 | 1.00120.31 | 1SG2675 |
| ATOM | 2675 | CZ  | PHE | 332 | 115.239 | 38.253 | 39.928 | 1.00120.31 | 1SG2676 |
| ATOM | 2676 | C   | PHE | 332 | 117.724 | 41.961 | 37.750 | 1.00120.31 | 1SG2677 |
| ATOM | 2677 | O   | PHE | 332 | 116.843 | 42.102 | 38.593 | 1.00120.31 | 1SG2678 |
| ATOM | 2678 | N   | THR | 333 | 118.951 | 42.491 | 37.928 | 1.00 98.38 | 1SG2679 |
| ATOM | 2679 | CA  | THR | 333 | 119.264 | 43.189 | 39.147 | 1.00 98.38 | 1SG2680 |
| ATOM | 2680 | CB  | THR | 333 | 120.702 | 43.629 | 39.234 | 1.00 98.38 | 1SG2681 |
| ATOM | 2681 | OG1 | THR | 333 | 120.992 | 44.080 | 40.548 | 1.00 98.38 | 1SG2682 |
| ATOM | 2682 | CG2 | THR | 333 | 120.964 | 44.752 | 38.218 | 1.00 98.38 | 1SG2683 |
| ATOM | 2683 | C   | THR | 333 | 118.382 | 44.393 | 39.251 | 1.00 98.38 | 1SG2684 |
| ATOM | 2684 | O   | THR | 333 | 117.892 | 44.728 | 40.329 | 1.00 98.38 | 1SG2685 |
| ATOM | 2685 | N   | LYS | 334 | 118.158 | 45.075 | 38.116 | 1.00 78.36 | 1SG2686 |
| ATOM | 2686 | CA  | LYS | 334 | 117.339 | 46.250 | 38.089 | 1.00 78.36 | 1SG2687 |
| ATOM | 2687 | CB  | LYS | 334 | 117.313 | 46.922 | 36.707 | 1.00 78.36 | 1SG2688 |
| ATOM | 2688 | CG  | LYS | 334 | 118.627 | 47.630 | 36.376 | 1.00 78.36 | 1SG2689 |
| ATOM | 2689 | CD  | LYS | 334 | 118.775 | 48.026 | 34.907 | 1.00 78.36 | 1SG2690 |
| ATOM | 2690 | CE  | LYS | 334 | 120.052 | 48.819 | 34.617 | 1.00 78.36 | 1SG2691 |
| ATOM | 2691 | NZ  | LYS | 334 | 121.231 | 48.098 | 35.149 | 1.00 78.36 | 1SG2692 |
| ATOM | 2692 | C   | LYS | 334 | 115.927 | 45.907 | 38.462 | 1.00 78.36 | 1SG2693 |
| ATOM | 2693 | O   | LYS | 334 | 115.259 | 46.678 | 39.149 | 1.00 78.36 | 1SG2694 |
| ATOM | 2694 | N   | ILE | 335 | 115.414 | 44.755 | 37.994 | 1.00139.62 | 1SG2695 |
| ATOM | 2695 | CA  | ILE | 335 | 114.049 | 44.400 | 38.275 | 1.00139.62 | 1SG2696 |
| ATOM | 2696 | CB  | ILE | 335 | 113.545 | 43.261 | 37.418 | 1.00139.62 | 1SG2697 |

## Supplementary material 1.txt

|      |      |     |     |     |         |        |        |            |         |
|------|------|-----|-----|-----|---------|--------|--------|------------|---------|
| ATOM | 2697 | CG2 | ILE | 335 | 113.662 | 43.730 | 35.958 | 1.00139.62 | 1SG2698 |
| ATOM | 2698 | CG1 | ILE | 335 | 114.264 | 41.925 | 37.680 | 1.00139.62 | 1SG2699 |
| ATOM | 2699 | CD1 | ILE | 335 | 113.740 | 41.156 | 38.893 | 1.00139.62 | 1SG2700 |
| ATOM | 2700 | C   | ILE | 335 | 113.860 | 44.096 | 39.733 | 1.00139.62 | 1SG2701 |
| ATOM | 2701 | O   | ILE | 335 | 112.892 | 44.541 | 40.346 | 1.00139.62 | 1SG2702 |
| ATOM | 2702 | N   | ALA | 336 | 114.789 | 43.334 | 40.334 | 1.00 34.76 | 1SG2703 |
| ATOM | 2703 | CA  | ALA | 336 | 114.652 | 42.937 | 41.705 | 1.00 34.76 | 1SG2704 |
| ATOM | 2704 | CB  | ALA | 336 | 115.765 | 41.966 | 42.125 | 1.00 34.76 | 1SG2705 |
| ATOM | 2705 | C   | ALA | 336 | 114.702 | 44.154 | 42.574 | 1.00 34.76 | 1SG2706 |
| ATOM | 2706 | O   | ALA | 336 | 113.918 | 44.291 | 43.512 | 1.00 34.76 | 1SG2707 |
| ATOM | 2707 | N   | ILE | 337 | 115.627 | 45.084 | 42.273 | 1.00123.02 | 1SG2708 |
| ATOM | 2708 | CA  | ILE | 337 | 115.744 | 46.267 | 43.068 | 1.00123.02 | 1SG2709 |
| ATOM | 2709 | CB  | ILE | 337 | 116.913 | 47.139 | 42.687 | 1.00123.02 | 1SG2710 |
| ATOM | 2710 | CG2 | ILE | 337 | 116.697 | 47.656 | 41.261 | 1.00123.02 | 1SG2711 |
| ATOM | 2711 | CG1 | ILE | 337 | 117.107 | 48.261 | 43.722 | 1.00123.02 | 1SG2712 |
| ATOM | 2712 | CD1 | ILE | 337 | 117.582 | 47.769 | 45.086 | 1.00123.02 | 1SG2713 |
| ATOM | 2713 | C   | ILE | 337 | 114.488 | 47.072 | 42.936 | 1.00123.02 | 1SG2714 |
| ATOM | 2714 | O   | ILE | 337 | 113.988 | 47.609 | 43.921 | 1.00123.02 | 1SG2715 |
| ATOM | 2715 | N   | LEU | 338 | 113.940 | 47.193 | 41.711 | 1.00 70.21 | 1SG2716 |
| ATOM | 2716 | CA  | LEU | 338 | 112.781 | 48.024 | 41.546 | 1.00 70.21 | 1SG2717 |
| ATOM | 2717 | CB  | LEU | 338 | 112.423 | 48.318 | 40.079 | 1.00 70.21 | 1SG2718 |
| ATOM | 2718 | CG  | LEU | 338 | 111.394 | 49.459 | 39.964 | 1.00 70.21 | 1SG2719 |
| ATOM | 2719 | CD2 | LEU | 338 | 111.039 | 49.760 | 38.501 | 1.00 70.21 | 1SG2720 |
| ATOM | 2720 | CD1 | LEU | 338 | 111.908 | 50.721 | 40.679 | 1.00 70.21 | 1SG2721 |
| ATOM | 2721 | C   | LEU | 338 | 111.591 | 47.444 | 42.255 | 1.00 70.21 | 1SG2722 |
| ATOM | 2722 | O   | LEU | 338 | 110.850 | 48.160 | 42.923 | 1.00 70.21 | 1SG2723 |
| ATOM | 2723 | N   | MET | 339 | 111.395 | 46.118 | 42.157 | 1.00119.87 | 1SG2724 |
| ATOM | 2724 | CA  | MET | 339 | 110.274 | 45.444 | 42.750 | 1.00119.87 | 1SG2725 |
| ATOM | 2725 | CB  | MET | 339 | 110.245 | 43.947 | 42.394 | 1.00119.87 | 1SG2726 |
| ATOM | 2726 | CG  | MET | 339 | 110.103 | 43.687 | 40.892 | 1.00119.87 | 1SG2727 |
| ATOM | 2727 | SD  | MET | 339 | 110.193 | 41.935 | 40.412 | 1.00119.87 | 1SG2728 |
| ATOM | 2728 | CE  | MET | 339 | 110.104 | 42.250 | 38.625 | 1.00119.87 | 1SG2729 |
| ATOM | 2729 | C   | MET | 339 | 110.371 | 45.559 | 44.238 | 1.00119.87 | 1SG2730 |
| ATOM | 2730 | O   | MET | 339 | 109.353 | 45.563 | 44.925 | 1.00119.87 | 1SG2731 |
| ATOM | 2731 | N   | THR | 340 | 111.596 | 45.622 | 44.791 | 1.00106.88 | 1SG2732 |
| ATOM | 2732 | CA  | THR | 340 | 111.701 | 45.683 | 46.220 | 1.00106.88 | 1SG2733 |
| ATOM | 2733 | CB  | THR | 340 | 113.105 | 45.686 | 46.760 | 1.00106.88 | 1SG2734 |
| ATOM | 2734 | OG1 | THR | 340 | 113.083 | 45.359 | 48.142 | 1.00106.88 | 1SG2735 |
| ATOM | 2735 | CG2 | THR | 340 | 113.720 | 47.083 | 46.591 | 1.00106.88 | 1SG2736 |
| ATOM | 2736 | C   | THR | 340 | 111.029 | 46.935 | 46.685 | 1.00106.88 | 1SG2737 |
| ATOM | 2737 | O   | THR | 340 | 110.414 | 46.948 | 47.748 | 1.00106.88 | 1SG2738 |
| ATOM | 2738 | N   | MET | 341 | 111.150 | 48.030 | 45.910 | 1.00123.62 | 1SG2739 |
| ATOM | 2739 | CA  | MET | 341 | 110.558 | 49.292 | 46.259 | 1.00123.62 | 1SG2740 |
| ATOM | 2740 | CB  | MET | 341 | 110.882 | 50.371 | 45.217 | 1.00123.62 | 1SG2741 |
| ATOM | 2741 | CG  | MET | 341 | 110.281 | 51.741 | 45.526 | 1.00123.62 | 1SG2742 |
| ATOM | 2742 | SD  | MET | 341 | 110.456 | 52.930 | 44.164 | 1.00123.62 | 1SG2743 |
| ATOM | 2743 | CE  | MET | 341 | 112.249 | 53.133 | 44.357 | 1.00123.62 | 1SG2744 |
| ATOM | 2744 | C   | MET | 341 | 109.067 | 49.174 | 46.294 | 1.00123.62 | 1SG2745 |
| ATOM | 2745 | O   | MET | 341 | 108.423 | 49.637 | 47.234 | 1.00123.62 | 1SG2746 |
| ATOM | 2746 | N   | LEU | 342 | 108.474 | 48.519 | 45.279 | 1.00156.54 | 1SG2747 |
| ATOM | 2747 | CA  | LEU | 342 | 107.045 | 48.420 | 45.222 | 1.00156.54 | 1SG2748 |
| ATOM | 2748 | CB  | LEU | 342 | 106.513 | 47.626 | 44.011 | 1.00156.54 | 1SG2749 |
| ATOM | 2749 | CG  | LEU | 342 | 106.712 | 48.306 | 42.644 | 1.00156.54 | 1SG2750 |
| ATOM | 2750 | CD2 | LEU | 342 | 108.197 | 48.426 | 42.275 | 1.00156.54 | 1SG2751 |
| ATOM | 2751 | CD1 | LEU | 342 | 105.954 | 49.641 | 42.572 | 1.00156.54 | 1SG2752 |
| ATOM | 2752 | C   | LEU | 342 | 106.600 | 47.688 | 46.440 | 1.00156.54 | 1SG2753 |
| ATOM | 2753 | O   | LEU | 342 | 105.575 | 48.022 | 47.029 | 1.00156.54 | 1SG2754 |
| ATOM | 2754 | N   | ASP | 343 | 107.368 | 46.657 | 46.838 | 1.00 67.66 | 1SG2755 |
| ATOM | 2755 | CA  | ASP | 343 | 107.035 | 45.860 | 47.981 | 1.00 67.66 | 1SG2756 |
| ATOM | 2756 | CB  | ASP | 343 | 108.031 | 44.704 | 48.193 | 1.00 67.66 | 1SG2757 |
| ATOM | 2757 | CG  | ASP | 343 | 107.609 | 43.906 | 49.418 | 1.00 67.66 | 1SG2758 |
| ATOM | 2758 | OD1 | ASP | 343 | 108.040 | 44.275 | 50.543 | 1.00 67.66 | 1SG2759 |
| ATOM | 2759 | OD2 | ASP | 343 | 106.865 | 42.905 | 49.244 | 1.00 67.66 | 1SG2760 |
| ATOM | 2760 | C   | ASP | 343 | 107.067 | 46.730 | 49.192 | 1.00 67.66 | 1SG2761 |
| ATOM | 2761 | O   | ASP | 343 | 106.175 | 46.652 | 50.033 | 1.00 67.66 | 1SG2762 |
| ATOM | 2762 | N   | ASP | 344 | 108.091 | 47.598 | 49.297 | 1.00 75.59 | 1SG2763 |
| ATOM | 2763 | CA  | ASP | 344 | 108.234 | 48.452 | 50.438 | 1.00 75.59 | 1SG2764 |
| ATOM | 2764 | CB  | ASP | 344 | 109.568 | 49.224 | 50.476 | 1.00 75.59 | 1SG2765 |
| ATOM | 2765 | CG  | ASP | 344 | 110.669 | 48.272 | 50.946 | 1.00 75.59 | 1SG2766 |
| ATOM | 2766 | OD1 | ASP | 344 | 111.085 | 47.385 | 50.155 | 1.00 75.59 | 1SG2767 |
| ATOM | 2767 | OD2 | ASP | 344 | 111.110 | 48.423 | 52.115 | 1.00 75.59 | 1SG2768 |

## Supplementary material 1.txt

|      |      |     |     |     |         |        |        |            |       |         |
|------|------|-----|-----|-----|---------|--------|--------|------------|-------|---------|
| ATOM | 2768 | C   | ASP | 344 | 107.102 | 49.433 | 50.483 | 1.00       | 75.59 | 1SG2769 |
| ATOM | 2769 | O   | ASP | 344 | 106.700 | 49.859 | 51.562 | 1.00       | 75.59 | 1SG2770 |
| ATOM | 2770 | N   | LEU | 345 | 106.584 | 49.862 | 49.317 | 1.00       | 53.41 | 1SG2771 |
| ATOM | 2771 | CA  | LEU | 345 | 105.498 | 50.805 | 49.275 | 1.00       | 53.41 | 1SG2772 |
| ATOM | 2772 | CB  | LEU | 345 | 105.169 | 51.259 | 47.844 | 1.00       | 53.41 | 1SG2773 |
| ATOM | 2773 | CG  | LEU | 345 | 104.010 | 52.270 | 47.784 | 1.00       | 53.41 | 1SG2774 |
| ATOM | 2774 | CD2 | LEU | 345 | 103.552 | 52.508 | 46.336 | 1.00       | 53.41 | 1SG2775 |
| ATOM | 2775 | CD1 | LEU | 345 | 104.377 | 53.571 | 48.516 | 1.00       | 53.41 | 1SG2776 |
| ATOM | 2776 | C   | LEU | 345 | 104.241 | 50.202 | 49.837 | 1.00       | 53.41 | 1SG2777 |
| ATOM | 2777 | O   | LEU | 345 | 103.569 | 50.808 | 50.668 | 1.00       | 53.41 | 1SG2778 |
| ATOM | 2778 | N   | TYR | 346 | 103.893 | 48.977 | 49.400 | 1.00143.72 |       | 1SG2779 |
| ATOM | 2779 | CA  | TYR | 346 | 102.680 | 48.332 | 49.821 | 1.00143.72 |       | 1SG2780 |
| ATOM | 2780 | CB  | TYR | 346 | 102.450 | 46.969 | 49.129 | 1.00143.72 |       | 1SG2781 |
| ATOM | 2781 | CG  | TYR | 346 | 102.014 | 47.152 | 47.710 | 1.00143.72 |       | 1SG2782 |
| ATOM | 2782 | CD1 | TYR | 346 | 102.880 | 47.594 | 46.735 | 1.00143.72 |       | 1SG2783 |
| ATOM | 2783 | CD2 | TYR | 346 | 100.721 | 46.845 | 47.348 | 1.00143.72 |       | 1SG2784 |
| ATOM | 2784 | CE1 | TYR | 346 | 102.462 | 47.744 | 45.432 | 1.00143.72 |       | 1SG2785 |
| ATOM | 2785 | CE2 | TYR | 346 | 100.297 | 46.991 | 46.047 | 1.00143.72 |       | 1SG2786 |
| ATOM | 2786 | CZ  | TYR | 346 | 101.165 | 47.451 | 45.088 | 1.00143.72 |       | 1SG2787 |
| ATOM | 2787 | OH  | TYR | 346 | 100.734 | 47.605 | 43.753 | 1.00143.72 |       | 1SG2788 |
| ATOM | 2788 | C   | TYR | 346 | 102.726 | 48.050 | 51.288 | 1.00143.72 |       | 1SG2789 |
| ATOM | 2789 | O   | TYR | 346 | 101.718 | 48.206 | 51.974 | 1.00143.72 |       | 1SG2790 |
| ATOM | 2790 | N   | ASP | 347 | 103.858 | 47.523 | 51.799 | 1.00147.61 |       | 1SG2791 |
| ATOM | 2791 | CA  | ASP | 347 | 103.875 | 47.226 | 53.201 | 1.00147.61 |       | 1SG2792 |
| ATOM | 2792 | CB  | ASP | 347 | 104.909 | 46.151 | 53.605 | 1.00147.61 |       | 1SG2793 |
| ATOM | 2793 | CG  | ASP | 347 | 106.326 | 46.611 | 53.298 | 1.00147.61 |       | 1SG2794 |
| ATOM | 2794 | OD1 | ASP | 347 | 106.486 | 47.485 | 52.408 | 1.00147.61 |       | 1SG2795 |
| ATOM | 2795 | OD2 | ASP | 347 | 107.272 | 46.086 | 53.945 | 1.00147.61 |       | 1SG2796 |
| ATOM | 2796 | C   | ASP | 347 | 104.037 | 48.426 | 54.097 | 1.00147.61 |       | 1SG2797 |
| ATOM | 2797 | O   | ASP | 347 | 103.236 | 48.637 | 55.007 | 1.00147.61 |       | 1SG2798 |
| ATOM | 2798 | N   | THR | 348 | 105.117 | 49.210 | 53.902 | 1.00195.88 |       | 1SG2799 |
| ATOM | 2799 | CA  | THR | 348 | 105.420 | 50.292 | 54.799 | 1.00195.88 |       | 1SG2800 |
| ATOM | 2800 | CB  | THR | 348 | 106.893 | 50.574 | 54.907 | 1.00195.88 |       | 1SG2801 |
| ATOM | 2801 | OG1 | THR | 348 | 107.392 | 51.117 | 53.695 | 1.00195.88 |       | 1SG2802 |
| ATOM | 2802 | CG2 | THR | 348 | 107.614 | 49.254 | 55.231 | 1.00195.88 |       | 1SG2803 |
| ATOM | 2803 | C   | THR | 348 | 104.751 | 51.624 | 54.556 | 1.00195.88 |       | 1SG2804 |
| ATOM | 2804 | O   | THR | 348 | 104.472 | 52.316 | 55.526 | 1.00195.88 |       | 1SG2805 |
| ATOM | 2805 | N   | HIS | 349 | 104.663 | 52.125 | 53.302 | 1.00147.89 |       | 1SG2806 |
| ATOM | 2806 | CA  | HIS | 349 | 104.139 | 53.461 | 53.096 | 1.00147.89 |       | 1SG2807 |
| ATOM | 2807 | ND1 | HIS | 349 | 104.731 | 56.703 | 52.548 | 1.00147.89 |       | 1SG2808 |
| ATOM | 2808 | CG  | HIS | 349 | 104.356 | 55.611 | 51.803 | 1.00147.89 |       | 1SG2809 |
| ATOM | 2809 | CB  | HIS | 349 | 104.900 | 54.226 | 52.002 | 1.00147.89 |       | 1SG2810 |
| ATOM | 2810 | NE2 | HIS | 349 | 103.211 | 57.421 | 51.093 | 1.00147.89 |       | 1SG2811 |
| ATOM | 2811 | CD2 | HIS | 349 | 103.426 | 56.067 | 50.916 | 1.00147.89 |       | 1SG2812 |
| ATOM | 2812 | CE1 | HIS | 349 | 104.015 | 57.761 | 52.083 | 1.00147.89 |       | 1SG2813 |
| ATOM | 2813 | C   | HIS | 349 | 102.680 | 53.684 | 52.789 | 1.00147.89 |       | 1SG2814 |
| ATOM | 2814 | O   | HIS | 349 | 101.966 | 54.370 | 53.519 | 1.00147.89 |       | 1SG2815 |
| ATOM | 2815 | N   | GLY | 350 | 102.198 | 53.060 | 51.693 | 1.00       | 55.65 | 1SG2816 |
| ATOM | 2816 | CA  | GLY | 350 | 100.961 | 53.438 | 51.057 | 1.00       | 55.65 | 1SG2817 |
| ATOM | 2817 | C   | GLY | 350 | 99.738  | 53.113 | 51.847 | 1.00       | 55.65 | 1SG2818 |
| ATOM | 2818 | O   | GLY | 350 | 99.704  | 52.184 | 52.652 | 1.00       | 55.65 | 1SG2819 |
| ATOM | 2819 | N   | THR | 351 | 98.682  | 53.912 | 51.576 | 1.00106.55 |       | 1SG2820 |
| ATOM | 2820 | CA  | THR | 351 | 97.391  | 53.799 | 52.180 | 1.00106.55 |       | 1SG2821 |
| ATOM | 2821 | CB  | THR | 351 | 96.722  | 55.131 | 52.326 | 1.00106.55 |       | 1SG2822 |
| ATOM | 2822 | OG1 | THR | 351 | 95.517  | 55.010 | 53.062 | 1.00106.55 |       | 1SG2823 |
| ATOM | 2823 | CG2 | THR | 351 | 96.429  | 55.675 | 50.920 | 1.00106.55 |       | 1SG2824 |
| ATOM | 2824 | C   | THR | 351 | 96.545  | 52.961 | 51.274 | 1.00106.55 |       | 1SG2825 |
| ATOM | 2825 | O   | THR | 351 | 96.917  | 52.684 | 50.135 | 1.00106.55 |       | 1SG2826 |
| ATOM | 2826 | N   | LEU | 352 | 95.358  | 52.554 | 51.759 | 1.00       | 42.17 | 1SG2827 |
| ATOM | 2827 | CA  | LEU | 352 | 94.517  | 51.682 | 50.995 | 1.00       | 42.17 | 1SG2828 |
| ATOM | 2828 | CB  | LEU | 352 | 93.218  | 51.314 | 51.732 | 1.00       | 42.17 | 1SG2829 |
| ATOM | 2829 | CG  | LEU | 352 | 92.303  | 50.377 | 50.927 | 1.00       | 42.17 | 1SG2830 |
| ATOM | 2830 | CD2 | LEU | 352 | 90.908  | 50.264 | 51.562 | 1.00       | 42.17 | 1SG2831 |
| ATOM | 2831 | CD1 | LEU | 352 | 92.972  | 49.011 | 50.707 | 1.00       | 42.17 | 1SG2832 |
| ATOM | 2832 | C   | LEU | 352 | 94.140  | 52.360 | 49.715 | 1.00       | 42.17 | 1SG2833 |
| ATOM | 2833 | O   | LEU | 352 | 94.174  | 51.739 | 48.655 | 1.00       | 42.17 | 1SG2834 |
| ATOM | 2834 | N   | ASP | 353 | 93.764  | 53.652 | 49.777 | 1.00       | 39.89 | 1SG2835 |
| ATOM | 2835 | CA  | ASP | 353 | 93.358  | 54.352 | 48.588 | 1.00       | 39.89 | 1SG2836 |
| ATOM | 2836 | CB  | ASP | 353 | 92.763  | 55.739 | 48.879 | 1.00       | 39.89 | 1SG2837 |
| ATOM | 2837 | CG  | ASP | 353 | 91.374  | 55.534 | 49.469 | 1.00       | 39.89 | 1SG2838 |
| ATOM | 2838 | OD1 | ASP | 353 | 90.566  | 54.797 | 48.840 | 1.00       | 39.89 | 1SG2839 |



## Supplementary material 1.txt

|      |      |     |     |     |         |        |        |      |        |         |
|------|------|-----|-----|-----|---------|--------|--------|------|--------|---------|
| ATOM | 2839 | OD2 | ASP | 353 | 91.097  | 56.118 | 50.550 | 1.00 | 39.89  | 1SG2840 |
| ATOM | 2840 | C   | ASP | 353 | 94.514  | 54.543 | 47.650 | 1.00 | 39.89  | 1SG2841 |
| ATOM | 2841 | O   | ASP | 353 | 94.385  | 54.316 | 46.448 | 1.00 | 39.89  | 1SG2842 |
| ATOM | 2842 | N   | GLN | 354 | 95.682  | 54.955 | 48.176 | 1.00 | 44.28  | 1SG2843 |
| ATOM | 2843 | CA  | GLN | 354 | 96.806  | 55.248 | 47.334 | 1.00 | 44.28  | 1SG2844 |
| ATOM | 2844 | CB  | GLN | 354 | 98.003  | 55.810 | 48.121 | 1.00 | 44.28  | 1SG2845 |
| ATOM | 2845 | CG  | GLN | 354 | 97.715  | 57.183 | 48.736 | 1.00 | 44.28  | 1SG2846 |
| ATOM | 2846 | CD  | GLN | 354 | 98.950  | 57.655 | 49.489 | 1.00 | 44.28  | 1SG2847 |
| ATOM | 2847 | OE1 | GLN | 354 | 99.323  | 57.105 | 50.526 | 1.00 | 44.28  | 1SG2848 |
| ATOM | 2848 | NE2 | GLN | 354 | 99.610  | 58.716 | 48.951 | 1.00 | 44.28  | 1SG2849 |
| ATOM | 2849 | C   | GLN | 354 | 97.241  | 53.997 | 46.648 | 1.00 | 44.28  | 1SG2850 |
| ATOM | 2850 | O   | GLN | 354 | 97.578  | 54.003 | 45.465 | 1.00 | 44.28  | 1SG2851 |
| ATOM | 2851 | N   | LEU | 355 | 97.231  | 52.879 | 47.390 | 1.00 | 133.55 | 1SG2852 |
| ATOM | 2852 | CA  | LEU | 355 | 97.673  | 51.623 | 46.871 | 1.00 | 133.55 | 1SG2853 |
| ATOM | 2853 | CB  | LEU | 355 | 97.683  | 50.533 | 47.953 | 1.00 | 133.55 | 1SG2854 |
| ATOM | 2854 | CG  | LEU | 355 | 98.459  | 49.287 | 47.519 | 1.00 | 133.55 | 1SG2855 |
| ATOM | 2855 | CD2 | LEU | 355 | 99.896  | 49.693 | 47.157 | 1.00 | 133.55 | 1SG2856 |
| ATOM | 2856 | CD1 | LEU | 355 | 97.750  | 48.507 | 46.399 | 1.00 | 133.55 | 1SG2857 |
| ATOM | 2857 | C   | LEU | 355 | 96.744  | 51.207 | 45.771 | 1.00 | 133.55 | 1SG2858 |
| ATOM | 2858 | O   | LEU | 355 | 97.174  | 50.655 | 44.759 | 1.00 | 133.55 | 1SG2859 |
| ATOM | 2859 | N   | LYS | 356 | 95.433  | 51.458 | 45.947 | 1.00 | 50.39  | 1SG2860 |
| ATOM | 2860 | CA  | LYS | 356 | 94.468  | 51.069 | 44.959 | 1.00 | 50.39  | 1SG2861 |
| ATOM | 2861 | CB  | LYS | 356 | 93.021  | 51.386 | 45.376 | 1.00 | 50.39  | 1SG2862 |
| ATOM | 2862 | CG  | LYS | 356 | 91.987  | 50.952 | 44.335 | 1.00 | 50.39  | 1SG2863 |
| ATOM | 2863 | CD  | LYS | 356 | 90.551  | 50.932 | 44.859 | 1.00 | 50.39  | 1SG2864 |
| ATOM | 2864 | CE  | LYS | 356 | 89.529  | 50.497 | 43.807 | 1.00 | 50.39  | 1SG2865 |
| ATOM | 2865 | NZ  | LYS | 356 | 89.667  | 49.048 | 43.534 | 1.00 | 50.39  | 1SG2866 |
| ATOM | 2866 | C   | LYS | 356 | 94.750  | 51.818 | 43.695 | 1.00 | 50.39  | 1SG2867 |
| ATOM | 2867 | O   | LYS | 356 | 94.673  | 51.258 | 42.603 | 1.00 | 50.39  | 1SG2868 |
| ATOM | 2868 | N   | ILE | 357 | 95.083  | 53.116 | 43.818 | 1.00 | 29.44  | 1SG2869 |
| ATOM | 2869 | CA  | ILE | 357 | 95.355  | 53.950 | 42.682 | 1.00 | 29.44  | 1SG2870 |
| ATOM | 2870 | CB  | ILE | 357 | 95.604  | 55.378 | 43.070 | 1.00 | 29.44  | 1SG2871 |
| ATOM | 2871 | CG2 | ILE | 357 | 96.052  | 56.143 | 41.813 | 1.00 | 29.44  | 1SG2872 |
| ATOM | 2872 | CG1 | ILE | 357 | 94.353  | 55.967 | 43.743 | 1.00 | 29.44  | 1SG2873 |
| ATOM | 2873 | CD1 | ILE | 357 | 94.606  | 57.297 | 44.451 | 1.00 | 29.44  | 1SG2874 |
| ATOM | 2874 | C   | ILE | 357 | 96.584  | 53.444 | 41.997 | 1.00 | 29.44  | 1SG2875 |
| ATOM | 2875 | O   | ILE | 357 | 96.654  | 53.417 | 40.769 | 1.00 | 29.44  | 1SG2876 |
| ATOM | 2876 | N   | PHE | 358 | 97.594  | 53.053 | 42.793 | 1.00 | 62.81  | 1SG2877 |
| ATOM | 2877 | CA  | PHE | 358 | 98.856  | 52.590 | 42.293 | 1.00 | 62.81  | 1SG2878 |
| ATOM | 2878 | CB  | PHE | 358 | 99.823  | 52.271 | 43.452 | 1.00 | 62.81  | 1SG2879 |
| ATOM | 2879 | CG  | PHE | 358 | 101.211 | 52.106 | 42.934 | 1.00 | 62.81  | 1SG2880 |
| ATOM | 2880 | CD1 | PHE | 358 | 101.995 | 53.213 | 42.699 | 1.00 | 62.81  | 1SG2881 |
| ATOM | 2881 | CD2 | PHE | 358 | 101.738 | 50.857 | 42.701 | 1.00 | 62.81  | 1SG2882 |
| ATOM | 2882 | CE1 | PHE | 358 | 103.279 | 53.081 | 42.226 | 1.00 | 62.81  | 1SG2883 |
| ATOM | 2883 | CE2 | PHE | 358 | 103.022 | 50.718 | 42.228 | 1.00 | 62.81  | 1SG2884 |
| ATOM | 2884 | CZ  | PHE | 358 | 103.795 | 51.829 | 41.989 | 1.00 | 62.81  | 1SG2885 |
| ATOM | 2885 | C   | PHE | 358 | 98.635  | 51.334 | 41.505 | 1.00 | 62.81  | 1SG2886 |
| ATOM | 2886 | O   | PHE | 358 | 99.121  | 51.203 | 40.382 | 1.00 | 62.81  | 1SG2887 |
| ATOM | 2887 | N   | THR | 359 | 97.859  | 50.388 | 42.071 | 1.00 | 47.66  | 1SG2888 |
| ATOM | 2888 | CA  | THR | 359 | 97.617  | 49.117 | 41.450 | 1.00 | 47.66  | 1SG2889 |
| ATOM | 2889 | CB  | THR | 359 | 96.739  | 48.231 | 42.286 | 1.00 | 47.66  | 1SG2890 |
| ATOM | 2890 | OG1 | THR | 359 | 97.324  | 48.028 | 43.566 | 1.00 | 47.66  | 1SG2891 |
| ATOM | 2891 | CG2 | THR | 359 | 96.577  | 46.883 | 41.564 | 1.00 | 47.66  | 1SG2892 |
| ATOM | 2892 | C   | THR | 359 | 96.929  | 49.341 | 40.136 | 1.00 | 47.66  | 1SG2893 |
| ATOM | 2893 | O   | THR | 359 | 97.277  | 48.729 | 39.128 | 1.00 | 47.66  | 1SG2894 |
| ATOM | 2894 | N   | GLU | 360 | 95.932  | 50.239 | 40.100 | 1.00 | 42.62  | 1SG2895 |
| ATOM | 2895 | CA  | GLU | 360 | 95.226  | 50.478 | 38.872 | 1.00 | 42.62  | 1SG2896 |
| ATOM | 2896 | CB  | GLU | 360 | 94.114  | 51.534 | 38.987 | 1.00 | 42.62  | 1SG2897 |
| ATOM | 2897 | CG  | GLU | 360 | 92.840  | 51.045 | 39.669 | 1.00 | 42.62  | 1SG2898 |
| ATOM | 2898 | CD  | GLU | 360 | 91.860  | 52.209 | 39.697 | 1.00 | 42.62  | 1SG2899 |
| ATOM | 2899 | OE1 | GLU | 360 | 92.330  | 53.378 | 39.702 | 1.00 | 42.62  | 1SG2900 |
| ATOM | 2900 | OE2 | GLU | 360 | 90.628  | 51.944 | 39.716 | 1.00 | 42.62  | 1SG2901 |
| ATOM | 2901 | C   | GLU | 360 | 96.183  | 51.022 | 37.867 | 1.00 | 42.62  | 1SG2902 |
| ATOM | 2902 | O   | GLU | 360 | 96.151  | 50.640 | 36.699 | 1.00 | 42.62  | 1SG2903 |
| ATOM | 2903 | N   | GLY | 361 | 97.074  | 51.928 | 38.304 | 1.00 | 25.56  | 1SG2904 |
| ATOM | 2904 | CA  | GLY | 361 | 97.964  | 52.557 | 37.378 | 1.00 | 25.56  | 1SG2905 |
| ATOM | 2905 | C   | GLY | 361 | 98.835  | 51.523 | 36.730 | 1.00 | 25.56  | 1SG2906 |
| ATOM | 2906 | O   | GLY | 361 | 99.059  | 51.574 | 35.522 | 1.00 | 25.56  | 1SG2907 |
| ATOM | 2907 | N   | VAL | 362 | 99.355  | 50.551 | 37.509 | 1.00 | 104.37 | 1SG2908 |
| ATOM | 2908 | CA  | VAL | 362 | 100.249 | 49.586 | 36.931 | 1.00 | 104.37 | 1SG2909 |
| ATOM | 2909 | CB  | VAL | 362 | 100.866 | 48.642 | 37.926 | 1.00 | 104.37 | 1SG2910 |

## Supplementary material 1.txt

|      |      |     |     |     |         |        |        |            |         |
|------|------|-----|-----|-----|---------|--------|--------|------------|---------|
| ATOM | 2910 | CG1 | VAL | 362 | 101.683 | 49.464 | 38.937 | 1.00104.37 | 1SG2911 |
| ATOM | 2911 | CG2 | VAL | 362 | 99.773  | 47.761 | 38.547 | 1.00104.37 | 1SG2912 |
| ATOM | 2912 | C   | VAL | 362 | 99.531  | 48.763 | 35.910 | 1.00104.37 | 1SG2913 |
| ATOM | 2913 | O   | VAL | 362 | 100.081 | 48.461 | 34.853 | 1.00104.37 | 1SG2914 |
| ATOM | 2914 | N   | ARG | 363 | 98.275  | 48.375 | 36.188 | 1.00 43.75 | 1SG2915 |
| ATOM | 2915 | CA  | ARG | 363 | 97.574  | 47.535 | 35.260 | 1.00 43.75 | 1SG2916 |
| ATOM | 2916 | CB  | ARG | 363 | 96.181  | 47.124 | 35.765 | 1.00 43.75 | 1SG2917 |
| ATOM | 2917 | CG  | ARG | 363 | 96.263  | 46.193 | 36.978 | 1.00 43.75 | 1SG2918 |
| ATOM | 2918 | CD  | ARG | 363 | 94.930  | 45.568 | 37.389 | 1.00 43.75 | 1SG2919 |
| ATOM | 2919 | NE  | ARG | 363 | 95.209  | 44.662 | 38.539 | 1.00 43.75 | 1SG2920 |
| ATOM | 2920 | CZ  | ARG | 363 | 95.611  | 43.377 | 38.313 | 1.00 43.75 | 1SG2921 |
| ATOM | 2921 | NH1 | ARG | 363 | 95.760  | 42.922 | 37.035 | 1.00 43.75 | 1SG2922 |
| ATOM | 2922 | NH2 | ARG | 363 | 95.865  | 42.545 | 39.366 | 1.00 43.75 | 1SG2923 |
| ATOM | 2923 | C   | ARG | 363 | 97.430  | 48.239 | 33.946 | 1.00 43.75 | 1SG2924 |
| ATOM | 2924 | O   | ARG | 363 | 97.612  | 47.631 | 32.892 | 1.00 43.75 | 1SG2925 |
| ATOM | 2925 | N   | ARG | 364 | 97.106  | 49.543 | 33.975 | 1.00124.02 | 1SG2926 |
| ATOM | 2926 | CA  | ARG | 364 | 96.892  | 50.307 | 32.779 | 1.00124.02 | 1SG2927 |
| ATOM | 2927 | CB  | ARG | 364 | 96.350  | 51.701 | 33.095 | 1.00124.02 | 1SG2928 |
| ATOM | 2928 | CG  | ARG | 364 | 95.081  | 51.631 | 33.953 | 1.00124.02 | 1SG2929 |
| ATOM | 2929 | CD  | ARG | 364 | 93.903  | 50.925 | 33.283 | 1.00124.02 | 1SG2930 |
| ATOM | 2930 | NE  | ARG | 364 | 92.771  | 50.925 | 34.253 | 1.00124.02 | 1SG2931 |
| ATOM | 2931 | CZ  | ARG | 364 | 91.940  | 52.005 | 34.338 | 1.00124.02 | 1SG2932 |
| ATOM | 2932 | NH1 | ARG | 364 | 92.152  | 53.095 | 33.545 | 1.00124.02 | 1SG2933 |
| ATOM | 2933 | NH2 | ARG | 364 | 90.896  | 51.993 | 35.217 | 1.00124.02 | 1SG2934 |
| ATOM | 2934 | C   | ARG | 364 | 98.178  | 50.429 | 32.017 | 1.00124.02 | 1SG2935 |
| ATOM | 2935 | O   | ARG | 364 | 98.186  | 50.341 | 30.790 | 1.00124.02 | 1SG2936 |
| ATOM | 2936 | N   | TRP | 365 | 99.309  | 50.600 | 32.731 | 1.00 96.65 | 1SG2937 |
| ATOM | 2937 | CA  | TRP | 365 | 100.599 | 50.689 | 32.098 | 1.00 96.65 | 1SG2938 |
| ATOM | 2938 | CB  | TRP | 365 | 100.908 | 49.423 | 31.272 | 1.00 96.65 | 1SG2939 |
| ATOM | 2939 | CG  | TRP | 365 | 102.291 | 49.325 | 30.670 | 1.00 96.65 | 1SG2940 |
| ATOM | 2940 | CD2 | TRP | 365 | 103.423 | 48.842 | 31.404 | 1.00 96.65 | 1SG2941 |
| ATOM | 2941 | CD1 | TRP | 365 | 102.738 | 49.618 | 29.414 | 1.00 96.65 | 1SG2942 |
| ATOM | 2942 | NE1 | TRP | 365 | 104.081 | 49.342 | 29.319 | 1.00 96.65 | 1SG2943 |
| ATOM | 2943 | CE2 | TRP | 365 | 104.517 | 48.865 | 30.538 | 1.00 96.65 | 1SG2944 |
| ATOM | 2944 | CE3 | TRP | 365 | 103.541 | 48.411 | 32.693 | 1.00 96.65 | 1SG2945 |
| ATOM | 2945 | CZ2 | TRP | 365 | 105.751 | 48.454 | 30.953 | 1.00 96.65 | 1SG2946 |
| ATOM | 2946 | CZ3 | TRP | 365 | 104.787 | 48.001 | 33.111 | 1.00 96.65 | 1SG2947 |
| ATOM | 2947 | CH2 | TRP | 365 | 105.870 | 48.024 | 32.257 | 1.00 96.65 | 1SG2948 |
| ATOM | 2948 | C   | TRP | 365 | 100.688 | 51.884 | 31.186 | 1.00 96.65 | 1SG2949 |
| ATOM | 2949 | O   | TRP | 365 | 101.197 | 51.781 | 30.072 | 1.00 96.65 | 1SG2950 |
| ATOM | 2950 | N   | ASP | 366 | 100.178 | 53.059 | 31.616 | 1.00 75.78 | 1SG2951 |
| ATOM | 2951 | CA  | ASP | 366 | 100.328 | 54.233 | 30.797 | 1.00 75.78 | 1SG2952 |
| ATOM | 2952 | CB  | ASP | 366 | 99.016  | 54.723 | 30.167 | 1.00 75.78 | 1SG2953 |
| ATOM | 2953 | CG  | ASP | 366 | 99.371  | 55.781 | 29.132 | 1.00 75.78 | 1SG2954 |
| ATOM | 2954 | OD1 | ASP | 366 | 100.201 | 55.480 | 28.233 | 1.00 75.78 | 1SG2955 |
| ATOM | 2955 | OD2 | ASP | 366 | 98.806  | 56.903 | 29.222 | 1.00 75.78 | 1SG2956 |
| ATOM | 2956 | C   | ASP | 366 | 100.845 | 55.346 | 31.666 | 1.00 75.78 | 1SG2957 |
| ATOM | 2957 | O   | ASP | 366 | 100.463 | 55.473 | 32.827 | 1.00 75.78 | 1SG2958 |
| ATOM | 2958 | N   | VAL | 367 | 101.739 | 56.188 | 31.112 | 1.00109.41 | 1SG2959 |
| ATOM | 2959 | CA  | VAL | 367 | 102.346 | 57.279 | 31.824 | 1.00109.41 | 1SG2960 |
| ATOM | 2960 | CB  | VAL | 367 | 103.479 | 57.917 | 31.077 | 1.00109.41 | 1SG2961 |
| ATOM | 2961 | CG1 | VAL | 367 | 104.622 | 56.890 | 31.011 | 1.00109.41 | 1SG2962 |
| ATOM | 2962 | CG2 | VAL | 367 | 102.977 | 58.385 | 29.699 | 1.00109.41 | 1SG2963 |
| ATOM | 2963 | C   | VAL | 367 | 101.332 | 58.328 | 32.176 | 1.00109.41 | 1SG2964 |
| ATOM | 2964 | O   | VAL | 367 | 101.499 | 59.045 | 33.160 | 1.00109.41 | 1SG2965 |
| ATOM | 2965 | N   | SER | 368 | 100.261 | 58.466 | 31.374 | 1.00 80.71 | 1SG2966 |
| ATOM | 2966 | CA  | SER | 368 | 99.280  | 59.492 | 31.605 | 1.00 80.71 | 1SG2967 |
| ATOM | 2967 | CB  | SER | 368 | 98.152  | 59.484 | 30.561 | 1.00 80.71 | 1SG2968 |
| ATOM | 2968 | OG  | SER | 368 | 97.222  | 60.520 | 30.845 | 1.00 80.71 | 1SG2969 |
| ATOM | 2969 | C   | SER | 368 | 98.640  | 59.310 | 32.950 | 1.00 80.71 | 1SG2970 |
| ATOM | 2970 | O   | SER | 368 | 98.194  | 60.275 | 33.566 | 1.00 80.71 | 1SG2971 |
| ATOM | 2971 | N   | LEU | 369 | 98.588  | 58.063 | 33.440 | 1.00113.73 | 1SG2972 |
| ATOM | 2972 | CA  | LEU | 369 | 97.958  | 57.704 | 34.680 | 1.00113.73 | 1SG2973 |
| ATOM | 2973 | CB  | LEU | 369 | 97.755  | 56.198 | 34.857 | 1.00113.73 | 1SG2974 |
| ATOM | 2974 | CG  | LEU | 369 | 96.736  | 55.670 | 33.838 | 1.00113.73 | 1SG2975 |
| ATOM | 2975 | CD2 | LEU | 369 | 96.106  | 54.364 | 34.320 | 1.00113.73 | 1SG2976 |
| ATOM | 2976 | CD1 | LEU | 369 | 97.323  | 55.618 | 32.417 | 1.00113.73 | 1SG2977 |
| ATOM | 2977 | C   | LEU | 369 | 98.698  | 58.252 | 35.863 | 1.00113.73 | 1SG2978 |
| ATOM | 2978 | O   | LEU | 369 | 98.187  | 58.217 | 36.982 | 1.00113.73 | 1SG2979 |
| ATOM | 2979 | N   | VAL | 370 | 99.939  | 58.724 | 35.658 | 1.00106.05 | 1SG2980 |
| ATOM | 2980 | CA  | VAL | 370 | 100.789 | 59.195 | 36.719 | 1.00106.05 | 1SG2981 |

## Supplementary material 1.txt

|      |      |     |     |     |         |        |        |            |         |
|------|------|-----|-----|-----|---------|--------|--------|------------|---------|
| ATOM | 2981 | CB  | VAL | 370 | 102.102 | 59.741 | 36.226 | 1.00106.05 | 1SG2982 |
| ATOM | 2982 | CG1 | VAL | 370 | 101.835 | 60.960 | 35.327 | 1.00106.05 | 1SG2983 |
| ATOM | 2983 | CG2 | VAL | 370 | 102.982 | 60.059 | 37.447 | 1.00106.05 | 1SG2984 |
| ATOM | 2984 | C   | VAL | 370 | 100.130 | 60.283 | 37.523 | 1.00106.05 | 1SG2985 |
| ATOM | 2985 | O   | VAL | 370 | 100.332 | 60.359 | 38.734 | 1.00106.05 | 1SG2986 |
| ATOM | 2986 | N   | GLU | 371 | 99.320  | 61.151 | 36.893 | 1.0073.80  | 1SG2987 |
| ATOM | 2987 | CA  | GLU | 371 | 98.735  | 62.268 | 37.590 | 1.0073.80  | 1SG2988 |
| ATOM | 2988 | CB  | GLU | 371 | 97.838  | 63.127 | 36.684 | 1.0073.80  | 1SG2989 |
| ATOM | 2989 | CG  | GLU | 371 | 98.615  | 63.966 | 35.666 | 1.0073.80  | 1SG2990 |
| ATOM | 2990 | CD  | GLU | 371 | 99.012  | 65.271 | 36.343 | 1.0073.80  | 1SG2991 |
| ATOM | 2991 | OE1 | GLU | 371 | 98.326  | 65.658 | 37.327 | 1.0073.80  | 1SG2992 |
| ATOM | 2992 | OE2 | GLU | 371 | 100.002 | 65.901 | 35.884 | 1.0073.80  | 1SG2993 |
| ATOM | 2993 | C   | GLU | 371 | 97.899  | 61.797 | 38.746 | 1.0073.80  | 1SG2994 |
| ATOM | 2994 | O   | GLU | 371 | 97.835  | 62.469 | 39.774 | 1.0073.80  | 1SG2995 |
| ATOM | 2995 | N   | GLY | 372 | 97.220  | 60.644 | 38.605 | 1.0035.50  | 1SG2996 |
| ATOM | 2996 | CA  | GLY | 372 | 96.361  | 60.118 | 39.632 | 1.0035.50  | 1SG2997 |
| ATOM | 2997 | C   | GLY | 372 | 97.161  | 59.802 | 40.864 | 1.0035.50  | 1SG2998 |
| ATOM | 2998 | O   | GLY | 372 | 96.647  | 59.870 | 41.981 | 1.0035.50  | 1SG2999 |
| ATOM | 2999 | N   | LEU | 373 | 98.428  | 59.390 | 40.682 | 1.0069.54  | 1SG3000 |
| ATOM | 3000 | CA  | LEU | 373 | 99.286  | 58.983 | 41.763 | 1.0069.54  | 1SG3001 |
| ATOM | 3001 | CB  | LEU | 373 | 100.492 | 58.167 | 41.262 | 1.0069.54  | 1SG3002 |
| ATOM | 3002 | CG  | LEU | 373 | 100.113 | 56.888 | 40.491 | 1.0069.54  | 1SG3003 |
| ATOM | 3003 | CD2 | LEU | 373 | 99.152  | 56.006 | 41.300 | 1.0069.54  | 1SG3004 |
| ATOM | 3004 | CD1 | LEU | 373 | 101.363 | 56.127 | 40.022 | 1.0069.54  | 1SG3005 |
| ATOM | 3005 | C   | LEU | 373 | 99.855  | 60.188 | 42.455 | 1.0069.54  | 1SG3006 |
| ATOM | 3006 | O   | LEU | 373 | 100.050 | 61.245 | 41.857 | 1.0069.54  | 1SG3007 |
| ATOM | 3007 | N   | PRO | 374 | 100.132 | 60.033 | 43.726 | 1.0083.12  | 1SG3008 |
| ATOM | 3008 | CA  | PRO | 374 | 100.738 | 61.073 | 44.514 | 1.0083.12  | 1SG3009 |
| ATOM | 3009 | CD  | PRO | 374 | 99.445  | 59.052 | 44.545 | 1.0083.12  | 1SG3010 |
| ATOM | 3010 | CB  | PRO | 374 | 100.543 | 60.666 | 45.976 | 1.0083.12  | 1SG3011 |
| ATOM | 3011 | CG  | PRO | 374 | 100.123 | 59.185 | 45.916 | 1.0083.12  | 1SG3012 |
| ATOM | 3012 | C   | PRO | 374 | 102.167 | 61.181 | 44.078 | 1.0083.12  | 1SG3013 |
| ATOM | 3013 | O   | PRO | 374 | 102.663 | 60.250 | 43.449 | 1.0083.12  | 1SG3014 |
| ATOM | 3014 | N   | ASP | 375 | 102.854 | 62.286 | 44.423 | 1.0048.05  | 1SG3015 |
| ATOM | 3015 | CA  | ASP | 375 | 104.168 | 62.561 | 43.911 | 1.0048.05  | 1SG3016 |
| ATOM | 3016 | CB  | ASP | 375 | 104.742 | 63.903 | 44.398 | 1.0048.05  | 1SG3017 |
| ATOM | 3017 | CG  | ASP | 375 | 104.040 | 65.023 | 43.635 | 1.0048.05  | 1SG3018 |
| ATOM | 3018 | OD1 | ASP | 375 | 103.351 | 64.713 | 42.627 | 1.0048.05  | 1SG3019 |
| ATOM | 3019 | OD2 | ASP | 375 | 104.195 | 66.206 | 44.041 | 1.0048.05  | 1SG3020 |
| ATOM | 3020 | C   | ASP | 375 | 105.156 | 61.483 | 44.250 | 1.0048.05  | 1SG3021 |
| ATOM | 3021 | O   | ASP | 375 | 105.998 | 61.149 | 43.419 | 1.0048.05  | 1SG3022 |
| ATOM | 3022 | N   | PHE | 376 | 105.117 | 60.896 | 45.459 | 1.0064.62  | 1SG3023 |
| ATOM | 3023 | CA  | PHE | 376 | 106.135 | 59.920 | 45.733 | 1.0064.62  | 1SG3024 |
| ATOM | 3024 | CB  | PHE | 376 | 106.167 | 59.418 | 47.193 | 1.0064.62  | 1SG3025 |
| ATOM | 3025 | CG  | PHE | 376 | 104.979 | 58.573 | 47.495 | 1.0064.62  | 1SG3026 |
| ATOM | 3026 | CD1 | PHE | 376 | 103.764 | 59.137 | 47.810 | 1.0064.62  | 1SG3027 |
| ATOM | 3027 | CD2 | PHE | 376 | 105.095 | 57.202 | 47.488 | 1.0064.62  | 1SG3028 |
| ATOM | 3028 | CE1 | PHE | 376 | 102.677 | 58.343 | 48.095 | 1.0064.62  | 1SG3029 |
| ATOM | 3029 | CE2 | PHE | 376 | 104.013 | 56.403 | 47.772 | 1.0064.62  | 1SG3030 |
| ATOM | 3030 | CZ  | PHE | 376 | 102.800 | 56.974 | 48.076 | 1.0064.62  | 1SG3031 |
| ATOM | 3031 | C   | PHE | 376 | 105.962 | 58.743 | 44.817 | 1.0064.62  | 1SG3032 |
| ATOM | 3032 | O   | PHE | 376 | 106.937 | 58.178 | 44.325 | 1.0064.62  | 1SG3033 |
| ATOM | 3033 | N   | MET | 377 | 104.704 | 58.336 | 44.577 | 1.0066.59  | 1SG3034 |
| ATOM | 3034 | CA  | MET | 377 | 104.391 | 57.208 | 43.745 | 1.0066.59  | 1SG3035 |
| ATOM | 3035 | CB  | MET | 377 | 102.909 | 56.797 | 43.796 | 1.0066.59  | 1SG3036 |
| ATOM | 3036 | CG  | MET | 377 | 102.517 | 56.091 | 45.096 | 1.0066.59  | 1SG3037 |
| ATOM | 3037 | SD  | MET | 377 | 100.776 | 55.574 | 45.177 | 1.0066.59  | 1SG3038 |
| ATOM | 3038 | CE  | MET | 377 | 101.028 | 54.341 | 46.487 | 1.0066.59  | 1SG3039 |
| ATOM | 3039 | C   | MET | 377 | 104.746 | 57.485 | 42.317 | 1.0066.59  | 1SG3040 |
| ATOM | 3040 | O   | MET | 377 | 105.041 | 56.559 | 41.564 | 1.0066.59  | 1SG3041 |
| ATOM | 3041 | N   | LYS | 378 | 104.677 | 58.756 | 41.881 | 1.00152.66 | 1SG3042 |
| ATOM | 3042 | CA  | LYS | 378 | 104.960 | 59.034 | 40.502 | 1.00152.66 | 1SG3043 |
| ATOM | 3043 | CB  | LYS | 378 | 104.730 | 60.495 | 40.077 | 1.00152.66 | 1SG3044 |
| ATOM | 3044 | CG  | LYS | 378 | 105.691 | 61.492 | 40.717 | 1.00152.66 | 1SG3045 |
| ATOM | 3045 | CD  | LYS | 378 | 105.747 | 62.844 | 40.001 | 1.00152.66 | 1SG3046 |
| ATOM | 3046 | CE  | LYS | 378 | 104.455 | 63.210 | 39.266 | 1.00152.66 | 1SG3047 |
| ATOM | 3047 | NZ  | LYS | 378 | 104.415 | 62.547 | 37.942 | 1.00152.66 | 1SG3048 |
| ATOM | 3048 | C   | LYS | 378 | 106.382 | 58.686 | 40.199 | 1.00152.66 | 1SG3049 |
| ATOM | 3049 | O   | LYS | 378 | 106.692 | 58.247 | 39.093 | 1.00152.66 | 1SG3050 |
| ATOM | 3050 | N   | ILE | 379 | 107.293 | 58.883 | 41.169 | 1.0039.93  | 1SG3051 |
| ATOM | 3051 | CA  | ILE | 379 | 108.678 | 58.615 | 40.920 | 1.0039.93  | 1SG3052 |

## Supplementary material 1.txt

|      |      |     |     |     |         |        |        |      |        |         |
|------|------|-----|-----|-----|---------|--------|--------|------|--------|---------|
| ATOM | 3052 | CB  | ILE | 379 | 109.541 | 58.936 | 42.108 | 1.00 | 39.93  | 1SG3053 |
| ATOM | 3053 | CG2 | ILE | 379 | 110.996 | 58.587 | 41.752 | 1.00 | 39.93  | 1SG3054 |
| ATOM | 3054 | CG1 | ILE | 379 | 109.355 | 60.406 | 42.518 | 1.00 | 39.93  | 1SG3055 |
| ATOM | 3055 | CD1 | ILE | 379 | 109.958 | 60.739 | 43.881 | 1.00 | 39.93  | 1SG3056 |
| ATOM | 3056 | C   | ILE | 379 | 108.840 | 57.152 | 40.626 | 1.00 | 39.93  | 1SG3057 |
| ATOM | 3057 | O   | ILE | 379 | 109.511 | 56.773 | 39.667 | 1.00 | 39.93  | 1SG3058 |
| ATOM | 3058 | N   | ALA | 380 | 108.213 | 56.288 | 41.448 | 1.00 | 38.16  | 1SG3059 |
| ATOM | 3059 | CA  | ALA | 380 | 108.330 | 54.863 | 41.296 | 1.00 | 38.16  | 1SG3060 |
| ATOM | 3060 | CB  | ALA | 380 | 107.597 | 54.089 | 42.405 | 1.00 | 38.16  | 1SG3061 |
| ATOM | 3061 | C   | ALA | 380 | 107.736 | 54.423 | 39.992 | 1.00 | 38.16  | 1SG3062 |
| ATOM | 3062 | O   | ALA | 380 | 108.325 | 53.622 | 39.267 | 1.00 | 38.16  | 1SG3063 |
| ATOM | 3063 | N   | PHE | 381 | 106.555 | 54.964 | 39.651 | 1.00 | 50.62  | 1SG3064 |
| ATOM | 3064 | CA  | PHE | 381 | 105.815 | 54.554 | 38.491 | 1.00 | 50.62  | 1SG3065 |
| ATOM | 3065 | CB  | PHE | 381 | 104.472 | 55.302 | 38.396 | 1.00 | 50.62  | 1SG3066 |
| ATOM | 3066 | CG  | PHE | 381 | 103.701 | 54.793 | 37.229 | 1.00 | 50.62  | 1SG3067 |
| ATOM | 3067 | CD1 | PHE | 381 | 102.890 | 53.688 | 37.351 | 1.00 | 50.62  | 1SG3068 |
| ATOM | 3068 | CD2 | PHE | 381 | 103.785 | 55.427 | 36.011 | 1.00 | 50.62  | 1SG3069 |
| ATOM | 3069 | CE1 | PHE | 381 | 102.176 | 53.223 | 36.271 | 1.00 | 50.62  | 1SG3070 |
| ATOM | 3070 | CE2 | PHE | 381 | 103.074 | 54.966 | 34.929 | 1.00 | 50.62  | 1SG3071 |
| ATOM | 3071 | CZ  | PHE | 381 | 102.268 | 53.861 | 35.058 | 1.00 | 50.62  | 1SG3072 |
| ATOM | 3072 | C   | PHE | 381 | 106.590 | 54.833 | 37.238 | 1.00 | 50.62  | 1SG3073 |
| ATOM | 3073 | O   | PHE | 381 | 106.664 | 53.985 | 36.349 | 1.00 | 50.62  | 1SG3074 |
| ATOM | 3074 | N   | GLU | 382 | 107.181 | 56.037 | 37.130 | 1.00 | 38.04  | 1SG3075 |
| ATOM | 3075 | CA  | GLU | 382 | 107.891 | 56.431 | 35.943 | 1.00 | 38.04  | 1SG3076 |
| ATOM | 3076 | CB  | GLU | 382 | 108.375 | 57.887 | 36.024 | 1.00 | 38.04  | 1SG3077 |
| ATOM | 3077 | CG  | GLU | 382 | 109.061 | 58.389 | 34.754 | 1.00 | 38.04  | 1SG3078 |
| ATOM | 3078 | CD  | GLU | 382 | 109.480 | 59.830 | 35.003 | 1.00 | 38.04  | 1SG3079 |
| ATOM | 3079 | OE1 | GLU | 382 | 110.121 | 60.082 | 36.057 | 1.00 | 38.04  | 1SG3080 |
| ATOM | 3080 | OE2 | GLU | 382 | 109.162 | 60.698 | 34.146 | 1.00 | 38.04  | 1SG3081 |
| ATOM | 3081 | C   | GLU | 382 | 109.102 | 55.574 | 35.768 | 1.00 | 38.04  | 1SG3082 |
| ATOM | 3082 | O   | GLU | 382 | 109.404 | 55.110 | 34.670 | 1.00 | 38.04  | 1SG3083 |
| ATOM | 3083 | N   | PHE | 383 | 109.814 | 55.310 | 36.873 | 1.00 | 83.08  | 1SG3084 |
| ATOM | 3084 | CA  | PHE | 383 | 111.058 | 54.604 | 36.828 | 1.00 | 83.08  | 1SG3085 |
| ATOM | 3085 | CB  | PHE | 383 | 111.598 | 54.400 | 38.254 | 1.00 | 83.08  | 1SG3086 |
| ATOM | 3086 | CG  | PHE | 383 | 113.010 | 53.934 | 38.221 | 1.00 | 83.08  | 1SG3087 |
| ATOM | 3087 | CD1 | PHE | 383 | 114.034 | 54.849 | 38.129 | 1.00 | 83.08  | 1SG3088 |
| ATOM | 3088 | CD2 | PHE | 383 | 113.313 | 52.595 | 38.301 | 1.00 | 83.08  | 1SG3089 |
| ATOM | 3089 | CE1 | PHE | 383 | 115.344 | 54.435 | 38.108 | 1.00 | 83.08  | 1SG3090 |
| ATOM | 3090 | CE2 | PHE | 383 | 114.622 | 52.175 | 38.280 | 1.00 | 83.08  | 1SG3091 |
| ATOM | 3091 | CZ  | PHE | 383 | 115.637 | 53.096 | 38.184 | 1.00 | 83.08  | 1SG3092 |
| ATOM | 3092 | C   | PHE | 383 | 110.810 | 53.258 | 36.225 | 1.00 | 83.08  | 1SG3093 |
| ATOM | 3093 | O   | PHE | 383 | 111.556 | 52.803 | 35.358 | 1.00 | 83.08  | 1SG3094 |
| ATOM | 3094 | N   | TRP | 384 | 109.744 | 52.578 | 36.680 | 1.00 | 158.48 | 1SG3095 |
| ATOM | 3095 | CA  | TRP | 384 | 109.461 | 51.256 | 36.207 | 1.00 | 158.48 | 1SG3096 |
| ATOM | 3096 | CB  | TRP | 384 | 108.301 | 50.574 | 36.960 | 1.00 | 158.48 | 1SG3097 |
| ATOM | 3097 | CG  | TRP | 384 | 107.820 | 49.276 | 36.341 | 1.00 | 158.48 | 1SG3098 |
| ATOM | 3098 | CD2 | TRP | 384 | 108.394 | 47.978 | 36.568 | 1.00 | 158.48 | 1SG3099 |
| ATOM | 3099 | CD1 | TRP | 384 | 106.784 | 49.088 | 35.473 | 1.00 | 158.48 | 1SG3100 |
| ATOM | 3100 | NE1 | TRP | 384 | 106.674 | 47.756 | 35.148 | 1.00 | 158.48 | 1SG3101 |
| ATOM | 3101 | CE2 | TRP | 384 | 107.659 | 47.062 | 35.815 | 1.00 | 158.48 | 1SG3102 |
| ATOM | 3102 | CE3 | TRP | 384 | 109.445 | 47.578 | 37.339 | 1.00 | 158.48 | 1SG3103 |
| ATOM | 3103 | CZ2 | TRP | 384 | 107.969 | 45.731 | 35.823 | 1.00 | 158.48 | 1SG3104 |
| ATOM | 3104 | CZ3 | TRP | 384 | 109.755 | 46.236 | 37.347 | 1.00 | 158.48 | 1SG3105 |
| ATOM | 3105 | CH2 | TRP | 384 | 109.031 | 45.330 | 36.603 | 1.00 | 158.48 | 1SG3106 |
| ATOM | 3106 | C   | TRP | 384 | 109.109 | 51.206 | 34.755 | 1.00 | 158.48 | 1SG3107 |
| ATOM | 3107 | O   | TRP | 384 | 109.705 | 50.452 | 33.989 | 1.00 | 158.48 | 1SG3108 |
| ATOM | 3108 | N   | LEU | 385 | 108.128 | 52.020 | 34.341 | 1.00 | 165.31 | 1SG3109 |
| ATOM | 3109 | CA  | LEU | 385 | 107.534 | 51.837 | 33.048 | 1.00 | 165.31 | 1SG3110 |
| ATOM | 3110 | CB  | LEU | 385 | 106.280 | 52.729 | 32.908 | 1.00 | 165.31 | 1SG3111 |
| ATOM | 3111 | CG  | LEU | 385 | 105.260 | 52.363 | 31.802 | 1.00 | 165.31 | 1SG3112 |
| ATOM | 3112 | CD2 | LEU | 385 | 105.896 | 51.927 | 30.474 | 1.00 | 165.31 | 1SG3113 |
| ATOM | 3113 | CD1 | LEU | 385 | 104.219 | 53.484 | 31.637 | 1.00 | 165.31 | 1SG3114 |
| ATOM | 3114 | C   | LEU | 385 | 108.447 | 52.137 | 31.915 | 1.00 | 165.31 | 1SG3115 |
| ATOM | 3115 | O   | LEU | 385 | 108.736 | 51.273 | 31.094 | 1.00 | 165.31 | 1SG3116 |
| ATOM | 3116 | N   | LYS | 386 | 109.002 | 53.348 | 31.873 | 1.00 | 283.15 | 1SG3117 |
| ATOM | 3117 | CA  | LYS | 386 | 109.679 | 53.710 | 30.670 | 1.00 | 283.15 | 1SG3118 |
| ATOM | 3118 | CB  | LYS | 386 | 111.017 | 53.008 | 30.366 | 1.00 | 283.15 | 1SG3119 |
| ATOM | 3119 | CG  | LYS | 386 | 111.671 | 53.604 | 29.107 | 1.00 | 283.15 | 1SG3120 |
| ATOM | 3120 | CD  | LYS | 386 | 113.126 | 53.223 | 28.832 | 1.00 | 283.15 | 1SG3121 |
| ATOM | 3121 | CE  | LYS | 386 | 114.059 | 54.400 | 28.540 | 1.00 | 283.15 | 1SG3122 |
| ATOM | 3122 | NZ  | LYS | 386 | 113.727 | 54.994 | 27.226 | 1.00 | 283.15 | 1SG3123 |

## Supplementary material 1.txt

|      |      |     |     |     |         |        |        |            |         |
|------|------|-----|-----|-----|---------|--------|--------|------------|---------|
| ATOM | 3123 | C   | LYS | 386 | 108.778 | 53.490 | 29.491 | 1.00283.15 | 1SG3124 |
| ATOM | 3124 | O   | LYS | 386 | 109.138 | 52.776 | 28.559 | 1.00283.15 | 1SG3125 |
| ATOM | 3125 | N   | THR | 387 | 107.536 | 54.013 | 29.501 | 1.00147.05 | 1SG3126 |
| ATOM | 3126 | CA  | THR | 387 | 106.907 | 53.922 | 28.217 | 1.00147.05 | 1SG3127 |
| ATOM | 3127 | CB  | THR | 387 | 105.453 | 54.336 | 28.168 | 1.00147.05 | 1SG3128 |
| ATOM | 3128 | OG1 | THR | 387 | 104.886 | 53.936 | 26.929 | 1.00147.05 | 1SG3129 |
| ATOM | 3129 | CG2 | THR | 387 | 105.292 | 55.854 | 28.340 | 1.00147.05 | 1SG3130 |
| ATOM | 3130 | C   | THR | 387 | 107.765 | 54.852 | 27.426 | 1.00147.05 | 1SG3131 |
| ATOM | 3131 | O   | THR | 387 | 108.165 | 54.581 | 26.295 | 1.00147.05 | 1SG3132 |
| ATOM | 3132 | N   | SER | 388 | 108.086 | 55.980 | 28.086 | 1.00113.77 | 1SG3133 |
| ATOM | 3133 | CA  | SER | 388 | 109.045 | 56.955 | 27.676 | 1.00113.77 | 1SG3134 |
| ATOM | 3134 | CB  | SER | 388 | 108.403 | 58.206 | 27.052 | 1.00113.77 | 1SG3135 |
| ATOM | 3135 | OG  | SER | 388 | 107.563 | 58.850 | 27.999 | 1.00113.77 | 1SG3136 |
| ATOM | 3136 | C   | SER | 388 | 109.646 | 57.353 | 28.984 | 1.00113.77 | 1SG3137 |
| ATOM | 3137 | O   | SER | 388 | 109.759 | 58.533 | 29.313 | 1.00113.77 | 1SG3138 |
| ATOM | 3138 | N   | ASN | 389 | 110.078 | 56.338 | 29.754 | 1.00163.78 | 1SG3139 |
| ATOM | 3139 | CA  | ASN | 389 | 110.544 | 56.549 | 31.092 | 1.00163.78 | 1SG3140 |
| ATOM | 3140 | CB  | ASN | 389 | 109.504 | 56.224 | 32.176 | 1.00163.78 | 1SG3141 |
| ATOM | 3141 | CG  | ASN | 389 | 108.362 | 57.224 | 32.079 | 1.00163.78 | 1SG3142 |
| ATOM | 3142 | OD1 | ASN | 389 | 108.501 | 58.305 | 31.509 | 1.00163.78 | 1SG3143 |
| ATOM | 3143 | ND2 | ASN | 389 | 107.192 | 56.854 | 32.664 | 1.00163.78 | 1SG3144 |
| ATOM | 3144 | C   | ASN | 389 | 111.749 | 55.696 | 31.323 | 1.00163.78 | 1SG3145 |
| ATOM | 3145 | O   | ASN | 389 | 112.665 | 55.697 | 30.507 | 1.00163.78 | 1SG3146 |
| ATOM | 3146 | N   | GLU | 390 | 111.875 | 55.082 | 32.520 | 1.00187.68 | 1SG3147 |
| ATOM | 3147 | CA  | GLU | 390 | 113.086 | 54.331 | 32.712 | 1.00187.68 | 1SG3148 |
| ATOM | 3148 | CB  | GLU | 390 | 113.600 | 54.408 | 34.162 | 1.00187.68 | 1SG3149 |
| ATOM | 3149 | CG  | GLU | 390 | 114.292 | 55.732 | 34.496 | 1.00187.68 | 1SG3150 |
| ATOM | 3150 | CD  | GLU | 390 | 113.236 | 56.810 | 34.693 | 1.00187.68 | 1SG3151 |
| ATOM | 3151 | OE1 | GLU | 390 | 112.030 | 56.453 | 34.761 | 1.00187.68 | 1SG3152 |
| ATOM | 3152 | OE2 | GLU | 390 | 113.622 | 58.006 | 34.776 | 1.00187.68 | 1SG3153 |
| ATOM | 3153 | C   | GLU | 390 | 113.233 | 52.876 | 32.297 | 1.00187.68 | 1SG3154 |
| ATOM | 3154 | O   | GLU | 390 | 113.950 | 52.555 | 31.351 | 1.00187.68 | 1SG3155 |
| ATOM | 3155 | N   | LEU | 391 | 112.542 | 51.959 | 33.014 | 1.00104.73 | 1SG3156 |
| ATOM | 3156 | CA  | LEU | 391 | 112.923 | 50.560 | 32.967 | 1.00104.73 | 1SG3157 |
| ATOM | 3157 | CB  | LEU | 391 | 112.519 | 49.812 | 34.251 | 1.00104.73 | 1SG3158 |
| ATOM | 3158 | CG  | LEU | 391 | 113.016 | 48.354 | 34.296 | 1.00104.73 | 1SG3159 |
| ATOM | 3159 | CD2 | LEU | 391 | 112.463 | 47.618 | 35.527 | 1.00104.73 | 1SG3160 |
| ATOM | 3160 | CD1 | LEU | 391 | 114.552 | 48.282 | 34.215 | 1.00104.73 | 1SG3161 |
| ATOM | 3161 | C   | LEU | 391 | 112.540 | 49.673 | 31.813 | 1.00104.73 | 1SG3162 |
| ATOM | 3162 | O   | LEU | 391 | 113.414 | 49.097 | 31.166 | 1.00104.73 | 1SG3163 |
| ATOM | 3163 | N   | ILE | 392 | 111.230 | 49.519 | 31.521 | 1.00151.15 | 1SG3164 |
| ATOM | 3164 | CA  | ILE | 392 | 110.862 | 48.480 | 30.591 | 1.00151.15 | 1SG3165 |
| ATOM | 3165 | CB  | ILE | 392 | 109.406 | 48.083 | 30.561 | 1.00151.15 | 1SG3166 |
| ATOM | 3166 | CG2 | ILE | 392 | 108.640 | 49.001 | 29.598 | 1.00151.15 | 1SG3167 |
| ATOM | 3167 | CG1 | ILE | 392 | 109.296 | 46.623 | 30.086 | 1.00151.15 | 1SG3168 |
| ATOM | 3168 | CD1 | ILE | 392 | 109.852 | 45.608 | 31.084 | 1.00151.15 | 1SG3169 |
| ATOM | 3169 | C   | ILE | 392 | 111.276 | 48.815 | 29.200 | 1.00151.15 | 1SG3170 |
| ATOM | 3170 | O   | ILE | 392 | 111.715 | 47.932 | 28.468 | 1.00151.15 | 1SG3171 |
| ATOM | 3171 | N   | ALA | 393 | 111.108 | 50.084 | 28.774 | 1.00 63.68 | 1SG3172 |
| ATOM | 3172 | CA  | ALA | 393 | 111.485 | 50.413 | 27.431 | 1.00 63.68 | 1SG3173 |
| ATOM | 3173 | CB  | ALA | 393 | 111.074 | 51.791 | 26.898 | 1.00 63.68 | 1SG3174 |
| ATOM | 3174 | C   | ALA | 393 | 112.960 | 50.278 | 27.307 | 1.00 63.68 | 1SG3175 |
| ATOM | 3175 | O   | ALA | 393 | 113.478 | 50.027 | 26.223 | 1.00 63.68 | 1SG3176 |
| ATOM | 3176 | N   | GLU | 394 | 113.700 | 50.504 | 28.402 | 1.00 69.06 | 1SG3177 |
| ATOM | 3177 | CA  | GLU | 394 | 115.114 | 50.355 | 28.276 | 1.00 69.06 | 1SG3178 |
| ATOM | 3178 | CB  | GLU | 394 | 115.874 | 50.656 | 29.577 | 1.00 69.06 | 1SG3179 |
| ATOM | 3179 | CG  | GLU | 394 | 117.391 | 50.668 | 29.387 | 1.00 69.06 | 1SG3180 |
| ATOM | 3180 | CD  | GLU | 394 | 118.015 | 51.312 | 30.616 | 1.00 69.06 | 1SG3181 |
| ATOM | 3181 | OE1 | GLU | 394 | 117.244 | 51.696 | 31.536 | 1.00 69.06 | 1SG3182 |
| ATOM | 3182 | OE2 | GLU | 394 | 119.269 | 51.433 | 30.652 | 1.00 69.06 | 1SG3183 |
| ATOM | 3183 | C   | GLU | 394 | 115.343 | 48.927 | 27.902 | 1.00 69.06 | 1SG3184 |
| ATOM | 3184 | O   | GLU | 394 | 116.173 | 48.619 | 27.047 | 1.00 69.06 | 1SG3185 |
| ATOM | 3185 | N   | ALA | 395 | 114.576 | 48.016 | 28.529 | 1.00 32.85 | 1SG3186 |
| ATOM | 3186 | CA  | ALA | 395 | 114.687 | 46.619 | 28.242 | 1.00 32.85 | 1SG3187 |
| ATOM | 3187 | CB  | ALA | 395 | 113.763 | 45.756 | 29.120 | 1.00 32.85 | 1SG3188 |
| ATOM | 3188 | C   | ALA | 395 | 114.302 | 46.387 | 26.812 | 1.00 32.85 | 1SG3189 |
| ATOM | 3189 | O   | ALA | 395 | 114.976 | 45.650 | 26.094 | 1.00 32.85 | 1SG3190 |
| ATOM | 3190 | N   | VAL | 396 | 113.213 | 47.027 | 26.343 | 1.00105.46 | 1SG3191 |
| ATOM | 3191 | CA  | VAL | 396 | 112.801 | 46.785 | 24.991 | 1.00105.46 | 1SG3192 |
| ATOM | 3192 | CB  | VAL | 396 | 111.498 | 47.429 | 24.584 | 1.00105.46 | 1SG3193 |
| ATOM | 3193 | CG1 | VAL | 396 | 110.392 | 46.927 | 25.527 | 1.00105.46 | 1SG3194 |

## Supplementary material 1.txt

|      |      |     |     |     |         |        |        |            |         |
|------|------|-----|-----|-----|---------|--------|--------|------------|---------|
| ATOM | 3194 | CG2 | VAL | 396 | 111.648 | 48.953 | 24.505 | 1.00105.46 | 1SG3195 |
| ATOM | 3195 | C   | VAL | 396 | 113.882 | 47.277 | 24.082 | 1.00105.46 | 1SG3196 |
| ATOM | 3196 | O   | VAL | 396 | 114.153 | 46.671 | 23.048 | 1.00105.46 | 1SG3197 |
| ATOM | 3197 | N   | LYS | 397 | 114.526 | 48.402 | 24.450 | 1.00133.59 | 1SG3198 |
| ATOM | 3198 | CA  | LYS | 397 | 115.559 | 48.996 | 23.646 | 1.00133.59 | 1SG3199 |
| ATOM | 3199 | CB  | LYS | 397 | 116.059 | 50.342 | 24.198 | 1.00133.59 | 1SG3200 |
| ATOM | 3200 | CG  | LYS | 397 | 115.098 | 51.500 | 23.929 | 1.00133.59 | 1SG3201 |
| ATOM | 3201 | CD  | LYS | 397 | 114.847 | 51.729 | 22.436 | 1.00133.59 | 1SG3202 |
| ATOM | 3202 | CE  | LYS | 397 | 114.007 | 52.969 | 22.131 | 1.00133.59 | 1SG3203 |
| ATOM | 3203 | NZ  | LYS | 397 | 114.839 | 54.186 | 22.268 | 1.00133.59 | 1SG3204 |
| ATOM | 3204 | C   | LYS | 397 | 116.750 | 48.090 | 23.533 | 1.00133.59 | 1SG3205 |
| ATOM | 3205 | O   | LYS | 397 | 117.327 | 47.958 | 22.455 | 1.00133.59 | 1SG3206 |
| ATOM | 3206 | N   | ALA | 398 | 117.158 | 47.443 | 24.641 | 1.00 37.53 | 1SG3207 |
| ATOM | 3207 | CA  | ALA | 398 | 118.324 | 46.600 | 24.623 | 1.00 37.53 | 1SG3208 |
| ATOM | 3208 | CB  | ALA | 398 | 118.648 | 46.010 | 26.005 | 1.00 37.53 | 1SG3209 |
| ATOM | 3209 | C   | ALA | 398 | 118.085 | 45.449 | 23.693 | 1.00 37.53 | 1SG3210 |
| ATOM | 3210 | O   | ALA | 398 | 118.978 | 45.019 | 22.963 | 1.00 37.53 | 1SG3211 |
| ATOM | 3211 | N   | GLN | 399 | 116.856 | 44.916 | 23.742 | 1.00 77.81 | 1SG3212 |
| ATOM | 3212 | CA  | GLN | 399 | 116.349 | 43.796 | 23.003 | 1.00 77.81 | 1SG3213 |
| ATOM | 3213 | CB  | GLN | 399 | 114.995 | 43.331 | 23.556 | 1.00 77.81 | 1SG3214 |
| ATOM | 3214 | CG  | GLN | 399 | 115.086 | 42.852 | 25.005 | 1.00 77.81 | 1SG3215 |
| ATOM | 3215 | CD  | GLN | 399 | 113.671 | 42.623 | 25.507 | 1.00 77.81 | 1SG3216 |
| ATOM | 3216 | OE1 | GLN | 399 | 113.318 | 41.523 | 25.929 | 1.00 77.81 | 1SG3217 |
| ATOM | 3217 | NE2 | GLN | 399 | 112.835 | 43.694 | 25.469 | 1.00 77.81 | 1SG3218 |
| ATOM | 3218 | C   | GLN | 399 | 116.145 | 44.118 | 21.552 | 1.00 77.81 | 1SG3219 |
| ATOM | 3219 | O   | GLN | 399 | 116.099 | 43.215 | 20.717 | 1.00 77.81 | 1SG3220 |
| ATOM | 3220 | N   | GLY | 400 | 115.986 | 45.410 | 21.218 | 1.00 42.56 | 1SG3221 |
| ATOM | 3221 | CA  | GLY | 400 | 115.573 | 45.839 | 19.910 | 1.00 42.56 | 1SG3222 |
| ATOM | 3222 | C   | GLY | 400 | 116.455 | 45.298 | 18.824 | 1.00 42.56 | 1SG3223 |
| ATOM | 3223 | O   | GLY | 400 | 115.965 | 44.983 | 17.742 | 1.00 42.56 | 1SG3224 |
| ATOM | 3224 | N   | GLN | 401 | 117.778 | 45.200 | 19.039 | 1.00 78.09 | 1SG3225 |
| ATOM | 3225 | CA  | GLN | 401 | 118.596 | 44.748 | 17.947 | 1.00 78.09 | 1SG3226 |
| ATOM | 3226 | CB  | GLN | 401 | 120.101 | 44.814 | 18.255 | 1.00 78.09 | 1SG3227 |
| ATOM | 3227 | CG  | GLN | 401 | 120.976 | 44.395 | 17.071 | 1.00 78.09 | 1SG3228 |
| ATOM | 3228 | CD  | GLN | 401 | 122.431 | 44.656 | 17.436 | 1.00 78.09 | 1SG3229 |
| ATOM | 3229 | OE1 | GLN | 401 | 122.732 | 45.170 | 18.512 | 1.00 78.09 | 1SG3230 |
| ATOM | 3230 | NE2 | GLN | 401 | 123.363 | 44.300 | 16.511 | 1.00 78.09 | 1SG3231 |
| ATOM | 3231 | C   | GLN | 401 | 118.256 | 43.330 | 17.577 | 1.00 78.09 | 1SG3232 |
| ATOM | 3232 | O   | GLN | 401 | 118.114 | 43.005 | 16.399 | 1.00 78.09 | 1SG3233 |
| ATOM | 3233 | N   | ASP | 402 | 118.104 | 42.458 | 18.589 | 1.00 74.61 | 1SG3234 |
| ATOM | 3234 | CA  | ASP | 402 | 117.831 | 41.050 | 18.459 | 1.00 74.61 | 1SG3235 |
| ATOM | 3235 | CB  | ASP | 402 | 118.031 | 40.280 | 19.774 | 1.00 74.61 | 1SG3236 |
| ATOM | 3236 | CG  | ASP | 402 | 119.519 | 40.270 | 20.095 | 1.00 74.61 | 1SG3237 |
| ATOM | 3237 | OD1 | ASP | 402 | 120.332 | 40.117 | 19.144 | 1.00 74.61 | 1SG3238 |
| ATOM | 3238 | OD2 | ASP | 402 | 119.862 | 40.406 | 21.300 | 1.00 74.61 | 1SG3239 |
| ATOM | 3239 | C   | ASP | 402 | 116.418 | 40.804 | 17.995 | 1.00 74.61 | 1SG3240 |
| ATOM | 3240 | O   | ASP | 402 | 116.124 | 39.722 | 17.489 | 1.00 74.61 | 1SG3241 |
| ATOM | 3241 | N   | MET | 403 | 115.533 | 41.825 | 18.075 | 1.00136.58 | 1SG3242 |
| ATOM | 3242 | CA  | MET | 403 | 114.107 | 41.694 | 17.870 | 1.00136.58 | 1SG3243 |
| ATOM | 3243 | CB  | MET | 403 | 113.738 | 41.151 | 16.478 | 1.00136.58 | 1SG3244 |
| ATOM | 3244 | CG  | MET | 403 | 113.992 | 42.143 | 15.341 | 1.00136.58 | 1SG3245 |
| ATOM | 3245 | SD  | MET | 403 | 112.834 | 43.545 | 15.288 | 1.00136.58 | 1SG3246 |
| ATOM | 3246 | CE  | MET | 403 | 113.462 | 44.360 | 16.784 | 1.00136.58 | 1SG3247 |
| ATOM | 3247 | C   | MET | 403 | 113.494 | 40.784 | 18.897 | 1.00136.58 | 1SG3248 |
| ATOM | 3248 | O   | MET | 403 | 112.508 | 40.089 | 18.645 | 1.00136.58 | 1SG3249 |
| ATOM | 3249 | N   | ALA | 404 | 114.135 | 40.767 | 20.078 | 1.00107.19 | 1SG3250 |
| ATOM | 3250 | CA  | ALA | 404 | 113.805 | 40.181 | 21.349 | 1.00107.19 | 1SG3251 |
| ATOM | 3251 | CB  | ALA | 404 | 115.009 | 40.087 | 22.302 | 1.00107.19 | 1SG3252 |
| ATOM | 3252 | C   | ALA | 404 | 112.735 | 40.970 | 22.064 | 1.00107.19 | 1SG3253 |
| ATOM | 3253 | O   | ALA | 404 | 112.241 | 40.522 | 23.091 | 1.00107.19 | 1SG3254 |
| ATOM | 3254 | N   | ALA | 405 | 112.435 | 42.209 | 21.630 | 1.00 68.16 | 1SG3255 |
| ATOM | 3255 | CA  | ALA | 405 | 111.585 | 43.158 | 22.319 | 1.00 68.16 | 1SG3256 |
| ATOM | 3256 | CB  | ALA | 405 | 111.398 | 44.459 | 21.518 | 1.00 68.16 | 1SG3257 |
| ATOM | 3257 | C   | ALA | 405 | 110.209 | 42.623 | 22.612 | 1.00 68.16 | 1SG3258 |
| ATOM | 3258 | O   | ALA | 405 | 109.617 | 42.968 | 23.634 | 1.00 68.16 | 1SG3259 |
| ATOM | 3259 | N   | TYR | 406 | 109.655 | 41.768 | 21.740 | 1.00131.84 | 1SG3260 |
| ATOM | 3260 | CA  | TYR | 406 | 108.309 | 41.282 | 21.879 | 1.00131.84 | 1SG3261 |
| ATOM | 3261 | CB  | TYR | 406 | 107.878 | 40.361 | 20.720 | 1.00131.84 | 1SG3262 |
| ATOM | 3262 | CG  | TYR | 406 | 108.813 | 39.204 | 20.644 | 1.00131.84 | 1SG3263 |
| ATOM | 3263 | CD1 | TYR | 406 | 108.622 | 38.099 | 21.440 | 1.00131.84 | 1SG3264 |
| ATOM | 3264 | CD2 | TYR | 406 | 109.875 | 39.224 | 19.767 | 1.00131.84 | 1SG3265 |

## Supplementary material 1.txt

|      |      |     |     |     |         |        |        |            |         |
|------|------|-----|-----|-----|---------|--------|--------|------------|---------|
| ATOM | 3265 | CE1 | TYR | 406 | 109.485 | 37.031 | 21.367 | 1.00131.84 | 1SG3266 |
| ATOM | 3266 | CE2 | TYR | 406 | 110.741 | 38.158 | 19.691 | 1.00131.84 | 1SG3267 |
| ATOM | 3267 | CZ  | TYR | 406 | 110.545 | 37.060 | 20.494 | 1.00131.84 | 1SG3268 |
| ATOM | 3268 | OH  | TYR | 406 | 111.431 | 35.964 | 20.420 | 1.00131.84 | 1SG3269 |
| ATOM | 3269 | C   | TYR | 406 | 108.113 | 40.566 | 23.192 | 1.00131.84 | 1SG3270 |
| ATOM | 3270 | O   | TYR | 406 | 106.995 | 40.526 | 23.701 | 1.00131.84 | 1SG3271 |
| ATOM | 3271 | N   | ILE | 407 | 109.173 | 39.934 | 23.733 | 1.00103.00 | 1SG3272 |
| ATOM | 3272 | CA  | ILE | 407 | 109.206 | 39.142 | 24.944 | 1.00103.00 | 1SG3273 |
| ATOM | 3273 | CB  | ILE | 407 | 110.501 | 38.412 | 25.185 | 1.00103.00 | 1SG3274 |
| ATOM | 3274 | CG2 | ILE | 407 | 110.782 | 37.516 | 23.970 | 1.00103.00 | 1SG3275 |
| ATOM | 3275 | CG1 | ILE | 407 | 111.637 | 39.395 | 25.504 | 1.00103.00 | 1SG3276 |
| ATOM | 3276 | CD1 | ILE | 407 | 112.901 | 38.724 | 26.040 | 1.00103.00 | 1SG3277 |
| ATOM | 3277 | C   | ILE | 407 | 108.968 | 39.920 | 26.216 | 1.00103.00 | 1SG3278 |
| ATOM | 3278 | O   | ILE | 407 | 108.573 | 39.326 | 27.216 | 1.00103.00 | 1SG3279 |
| ATOM | 3279 | N   | ARG | 408 | 109.271 | 41.233 | 26.265 | 1.00149.10 | 1SG3280 |
| ATOM | 3280 | CA  | ARG | 408 | 109.236 | 41.991 | 27.495 | 1.00149.10 | 1SG3281 |
| ATOM | 3281 | CB  | ARG | 408 | 109.651 | 43.470 | 27.332 | 1.00149.10 | 1SG3282 |
| ATOM | 3282 | CG  | ARG | 408 | 108.778 | 44.321 | 26.402 | 1.00149.10 | 1SG3283 |
| ATOM | 3283 | CD  | ARG | 408 | 107.368 | 44.569 | 26.942 | 1.00149.10 | 1SG3284 |
| ATOM | 3284 | NE  | ARG | 408 | 106.739 | 45.656 | 26.143 | 1.00149.10 | 1SG3285 |
| ATOM | 3285 | CZ  | ARG | 408 | 106.652 | 46.910 | 26.672 | 1.00149.10 | 1SG3286 |
| ATOM | 3286 | NH1 | ARG | 408 | 107.141 | 47.155 | 27.923 | 1.00149.10 | 1SG3287 |
| ATOM | 3287 | NH2 | ARG | 408 | 106.060 | 47.916 | 25.962 | 1.00149.10 | 1SG3288 |
| ATOM | 3288 | C   | ARG | 408 | 107.884 | 41.944 | 28.147 | 1.00149.10 | 1SG3289 |
| ATOM | 3289 | O   | ARG | 408 | 107.781 | 42.053 | 29.368 | 1.00149.10 | 1SG3290 |
| ATOM | 3290 | N   | LYS | 409 | 106.808 | 41.795 | 27.359 | 1.00118.20 | 1SG3291 |
| ATOM | 3291 | CA  | LYS | 409 | 105.461 | 41.828 | 27.860 | 1.00118.20 | 1SG3292 |
| ATOM | 3292 | CB  | LYS | 409 | 104.435 | 41.486 | 26.769 | 1.00118.20 | 1SG3293 |
| ATOM | 3293 | CG  | LYS | 409 | 103.000 | 41.382 | 27.283 | 1.00118.20 | 1SG3294 |
| ATOM | 3294 | CD  | LYS | 409 | 101.956 | 41.317 | 26.169 | 1.00118.20 | 1SG3295 |
| ATOM | 3295 | CE  | LYS | 409 | 100.549 | 40.997 | 26.676 | 1.00118.20 | 1SG3296 |
| ATOM | 3296 | NZ  | LYS | 409 | 100.512 | 39.619 | 27.215 | 1.00118.20 | 1SG3297 |
| ATOM | 3297 | C   | LYS | 409 | 105.261 | 40.821 | 28.956 | 1.00118.20 | 1SG3298 |
| ATOM | 3298 | O   | LYS | 409 | 104.577 | 41.103 | 29.940 | 1.00118.20 | 1SG3299 |
| ATOM | 3299 | N   | ASN | 410 | 105.856 | 39.624 | 28.825 | 1.00 47.12 | 1SG3300 |
| ATOM | 3300 | CA  | ASN | 410 | 105.641 | 38.572 | 29.779 | 1.00 47.12 | 1SG3301 |
| ATOM | 3301 | CB  | ASN | 410 | 106.413 | 37.291 | 29.424 | 1.00 47.12 | 1SG3302 |
| ATOM | 3302 | CG  | ASN | 410 | 105.735 | 36.681 | 28.205 | 1.00 47.12 | 1SG3303 |
| ATOM | 3303 | OD1 | ASN | 410 | 104.706 | 36.018 | 28.324 | 1.00 47.12 | 1SG3304 |
| ATOM | 3304 | ND2 | ASN | 410 | 106.313 | 36.920 | 26.997 | 1.00 47.12 | 1SG3305 |
| ATOM | 3305 | C   | ASN | 410 | 106.077 | 39.011 | 31.142 | 1.00 47.12 | 1SG3306 |
| ATOM | 3306 | O   | ASN | 410 | 105.396 | 38.746 | 32.132 | 1.00 47.12 | 1SG3307 |
| ATOM | 3307 | N   | ALA | 411 | 107.230 | 39.693 | 31.234 | 1.00 37.79 | 1SG3308 |
| ATOM | 3308 | CA  | ALA | 411 | 107.719 | 40.136 | 32.504 | 1.00 37.79 | 1SG3309 |
| ATOM | 3309 | CB  | ALA | 411 | 109.080 | 40.845 | 32.405 | 1.00 37.79 | 1SG3310 |
| ATOM | 3310 | C   | ALA | 411 | 106.749 | 41.111 | 33.097 | 1.00 37.79 | 1SG3311 |
| ATOM | 3311 | O   | ALA | 411 | 106.508 | 41.084 | 34.304 | 1.00 37.79 | 1SG3312 |
| ATOM | 3312 | N   | TRP | 412 | 106.172 | 42.015 | 32.276 | 1.00179.14 | 1SG3313 |
| ATOM | 3313 | CA  | TRP | 412 | 105.304 | 43.006 | 32.853 | 1.00179.14 | 1SG3314 |
| ATOM | 3314 | CB  | TRP | 412 | 104.907 | 44.205 | 31.963 | 1.00179.14 | 1SG3315 |
| ATOM | 3315 | CG  | TRP | 412 | 103.968 | 43.972 | 30.807 | 1.00179.14 | 1SG3316 |
| ATOM | 3316 | CD2 | TRP | 412 | 102.556 | 43.753 | 30.948 | 1.00179.14 | 1SG3317 |
| ATOM | 3317 | CD1 | TRP | 412 | 104.229 | 43.948 | 29.472 | 1.00179.14 | 1SG3318 |
| ATOM | 3318 | NE1 | TRP | 412 | 103.067 | 43.736 | 28.768 | 1.00179.14 | 1SG3319 |
| ATOM | 3319 | CE2 | TRP | 412 | 102.029 | 43.611 | 29.666 | 1.00179.14 | 1SG3320 |
| ATOM | 3320 | CE3 | TRP | 412 | 101.762 | 43.677 | 32.055 | 1.00179.14 | 1SG3321 |
| ATOM | 3321 | CZ2 | TRP | 412 | 100.696 | 43.392 | 29.469 | 1.00179.14 | 1SG3322 |
| ATOM | 3322 | CZ3 | TRP | 412 | 100.418 | 43.454 | 31.855 | 1.00179.14 | 1SG3323 |
| ATOM | 3323 | CH2 | TRP | 412 | 99.894  | 43.315 | 30.587 | 1.00179.14 | 1SG3324 |
| ATOM | 3324 | C   | TRP | 412 | 104.051 | 42.392 | 33.394 | 1.00179.14 | 1SG3325 |
| ATOM | 3325 | O   | TRP | 412 | 103.603 | 42.751 | 34.481 | 1.00179.14 | 1SG3326 |
| ATOM | 3326 | N   | GLU | 413 | 103.461 | 41.427 | 32.669 | 1.00120.66 | 1SG3327 |
| ATOM | 3327 | CA  | GLU | 413 | 102.217 | 40.860 | 33.103 | 1.00120.66 | 1SG3328 |
| ATOM | 3328 | CB  | GLU | 413 | 101.721 | 39.743 | 32.175 | 1.00120.66 | 1SG3329 |
| ATOM | 3329 | CG  | GLU | 413 | 100.323 | 39.249 | 32.535 | 1.00120.66 | 1SG3330 |
| ATOM | 3330 | CD  | GLU | 413 | 99.370  | 40.415 | 32.323 | 1.00120.66 | 1SG3331 |
| ATOM | 3331 | OE1 | GLU | 413 | 99.300  | 41.295 | 33.222 | 1.00120.66 | 1SG3332 |
| ATOM | 3332 | OE2 | GLU | 413 | 98.705  | 40.446 | 31.254 | 1.00120.66 | 1SG3333 |
| ATOM | 3333 | C   | GLU | 413 | 102.424 | 40.269 | 34.460 | 1.00120.66 | 1SG3334 |
| ATOM | 3334 | O   | GLU | 413 | 101.556 | 40.353 | 35.328 | 1.00120.66 | 1SG3335 |
| ATOM | 3335 | N   | ARG | 414 | 103.592 | 39.644 | 34.672 | 1.00 77.09 | 1SG3336 |

## Supplementary material 1.txt

|      |      |     |     |     |         |        |        |      |        |         |
|------|------|-----|-----|-----|---------|--------|--------|------|--------|---------|
| ATOM | 3336 | CA  | ARG | 414 | 103.923 | 39.045 | 35.929 | 1.00 | 77.09  | 1SG3337 |
| ATOM | 3337 | CB  | ARG | 414 | 105.257 | 38.284 | 35.877 | 1.00 | 77.09  | 1SG3338 |
| ATOM | 3338 | CG  | ARG | 414 | 105.176 | 37.039 | 34.994 | 1.00 | 77.09  | 1SG3339 |
| ATOM | 3339 | CD  | ARG | 414 | 105.047 | 35.742 | 35.792 | 1.00 | 77.09  | 1SG3340 |
| ATOM | 3340 | NE  | ARG | 414 | 104.684 | 34.665 | 34.829 | 1.00 | 77.09  | 1SG3341 |
| ATOM | 3341 | CZ  | ARG | 414 | 103.405 | 34.192 | 34.798 | 1.00 | 77.09  | 1SG3342 |
| ATOM | 3342 | NH1 | ARG | 414 | 102.488 | 34.645 | 35.703 | 1.00 | 77.09  | 1SG3343 |
| ATOM | 3343 | NH2 | ARG | 414 | 103.044 | 33.255 | 33.874 | 1.00 | 77.09  | 1SG3344 |
| ATOM | 3344 | C   | ARG | 414 | 104.033 | 40.125 | 36.961 | 1.00 | 77.09  | 1SG3345 |
| ATOM | 3345 | O   | ARG | 414 | 103.688 | 39.922 | 38.123 | 1.00 | 77.09  | 1SG3346 |
| ATOM | 3346 | N   | TYR | 415 | 104.540 | 41.307 | 36.567 | 1.00 | 97.74  | 1SG3347 |
| ATOM | 3347 | CA  | TYR | 415 | 104.695 | 42.398 | 37.487 | 1.00 | 97.74  | 1SG3348 |
| ATOM | 3348 | CB  | TYR | 415 | 105.341 | 43.645 | 36.851 | 1.00 | 97.74  | 1SG3349 |
| ATOM | 3349 | CG  | TYR | 415 | 105.223 | 44.758 | 37.839 | 1.00 | 97.74  | 1SG3350 |
| ATOM | 3350 | CD1 | TYR | 415 | 106.129 | 44.896 | 38.866 | 1.00 | 97.74  | 1SG3351 |
| ATOM | 3351 | CD2 | TYR | 415 | 104.198 | 45.671 | 37.735 | 1.00 | 97.74  | 1SG3352 |
| ATOM | 3352 | CE1 | TYR | 415 | 106.012 | 45.925 | 39.772 | 1.00 | 97.74  | 1SG3353 |
| ATOM | 3353 | CE2 | TYR | 415 | 104.075 | 46.702 | 38.638 | 1.00 | 97.74  | 1SG3354 |
| ATOM | 3354 | CZ  | TYR | 415 | 104.982 | 46.829 | 39.662 | 1.00 | 97.74  | 1SG3355 |
| ATOM | 3355 | OH  | TYR | 415 | 104.860 | 47.885 | 40.590 | 1.00 | 97.74  | 1SG3356 |
| ATOM | 3356 | C   | TYR | 415 | 103.356 | 42.832 | 38.001 | 1.00 | 97.74  | 1SG3357 |
| ATOM | 3357 | O   | TYR | 415 | 103.189 | 43.070 | 39.196 | 1.00 | 97.74  | 1SG3358 |
| ATOM | 3358 | N   | LEU | 416 | 102.350 | 42.924 | 37.115 | 1.00 | 102.08 | 1SG3359 |
| ATOM | 3359 | CA  | LEU | 416 | 101.062 | 43.417 | 37.511 | 1.00 | 102.08 | 1SG3360 |
| ATOM | 3360 | CB  | LEU | 416 | 100.060 | 43.529 | 36.348 | 1.00 | 102.08 | 1SG3361 |
| ATOM | 3361 | CG  | LEU | 416 | 100.313 | 44.741 | 35.430 | 1.00 | 102.08 | 1SG3362 |
| ATOM | 3362 | CD2 | LEU | 416 | 99.208  | 44.874 | 34.370 | 1.00 | 102.08 | 1SG3363 |
| ATOM | 3363 | CD1 | LEU | 416 | 101.718 | 44.710 | 34.818 | 1.00 | 102.08 | 1SG3364 |
| ATOM | 3364 | C   | LEU | 416 | 100.460 | 42.539 | 38.569 | 1.00 | 102.08 | 1SG3365 |
| ATOM | 3365 | O   | LEU | 416 | 99.795  | 43.028 | 39.478 | 1.00 | 102.08 | 1SG3366 |
| ATOM | 3366 | N   | GLU | 417 | 100.699 | 41.220 | 38.501 | 1.00 | 117.75 | 1SG3367 |
| ATOM | 3367 | CA  | GLU | 417 | 100.061 | 40.263 | 39.372 | 1.00 | 117.75 | 1SG3368 |
| ATOM | 3368 | CB  | GLU | 417 | 100.323 | 38.798 | 38.977 | 1.00 | 117.75 | 1SG3369 |
| ATOM | 3369 | CG  | GLU | 417 | 101.754 | 38.319 | 39.204 | 1.00 | 117.75 | 1SG3370 |
| ATOM | 3370 | CD  | GLU | 417 | 101.889 | 36.957 | 38.542 | 1.00 | 117.75 | 1SG3371 |
| ATOM | 3371 | OE1 | GLU | 417 | 100.912 | 36.530 | 37.871 | 1.00 | 117.75 | 1SG3372 |
| ATOM | 3372 | OE2 | GLU | 417 | 102.969 | 36.326 | 38.694 | 1.00 | 117.75 | 1SG3373 |
| ATOM | 3373 | C   | GLU | 417 | 100.412 | 40.419 | 40.844 | 1.00 | 117.75 | 1SG3374 |
| ATOM | 3374 | O   | GLU | 417 | 99.626  | 40.022 | 41.699 | 1.00 | 117.75 | 1SG3375 |
| ATOM | 3375 | N   | ALA | 418 | 101.568 | 41.019 | 41.188 | 1.00 | 197.09 | 1SG3376 |
| ATOM | 3376 | CA  | ALA | 418 | 102.193 | 41.021 | 42.504 | 1.00 | 197.09 | 1SG3377 |
| ATOM | 3377 | CB  | ALA | 418 | 103.567 | 41.715 | 42.460 | 1.00 | 197.09 | 1SG3378 |
| ATOM | 3378 | C   | ALA | 418 | 101.508 | 41.552 | 43.851 | 1.00 | 197.09 | 1SG3379 |
| ATOM | 3379 | O   | ALA | 418 | 101.821 | 40.946 | 44.855 | 1.00 | 197.09 | 1SG3380 |
| ATOM | 3380 | N   | TYR | 419 | 100.661 | 42.613 | 44.122 | 1.00 | 273.32 | 1SG3381 |
| ATOM | 3381 | CA  | TYR | 419 | 100.530 | 42.882 | 45.597 | 1.00 | 273.32 | 1SG3382 |
| ATOM | 3382 | CB  | TYR | 419 | 101.653 | 43.799 | 46.116 | 1.00 | 273.32 | 1SG3383 |
| ATOM | 3383 | CG  | TYR | 419 | 102.987 | 43.137 | 46.060 | 1.00 | 273.32 | 1SG3384 |
| ATOM | 3384 | CD1 | TYR | 419 | 103.363 | 42.231 | 47.026 | 1.00 | 273.32 | 1SG3385 |
| ATOM | 3385 | CD2 | TYR | 419 | 103.878 | 43.449 | 45.057 | 1.00 | 273.32 | 1SG3386 |
| ATOM | 3386 | CE1 | TYR | 419 | 104.600 | 41.632 | 46.983 | 1.00 | 273.32 | 1SG3387 |
| ATOM | 3387 | CE2 | TYR | 419 | 105.117 | 42.853 | 45.008 | 1.00 | 273.32 | 1SG3388 |
| ATOM | 3388 | CZ  | TYR | 419 | 105.479 | 41.944 | 45.973 | 1.00 | 273.32 | 1SG3389 |
| ATOM | 3389 | OH  | TYR | 419 | 106.750 | 41.332 | 45.928 | 1.00 | 273.32 | 1SG3390 |
| ATOM | 3390 | C   | TYR | 419 | 99.282  | 43.518 | 46.249 | 1.00 | 273.32 | 1SG3391 |
| ATOM | 3391 | O   | TYR | 419 | 99.271  | 43.661 | 47.475 | 1.00 | 273.32 | 1SG3392 |
| ATOM | 3392 | N   | LEU | 420 | 98.221  | 43.955 | 45.548 | 1.00 | 185.54 | 1SG3393 |
| ATOM | 3393 | CA  | LEU | 420 | 97.144  | 44.681 | 46.213 | 1.00 | 185.54 | 1SG3394 |
| ATOM | 3394 | CB  | LEU | 420 | 96.161  | 45.290 | 45.182 | 1.00 | 185.54 | 1SG3395 |
| ATOM | 3395 | CG  | LEU | 420 | 95.077  | 46.277 | 45.692 | 1.00 | 185.54 | 1SG3396 |
| ATOM | 3396 | CD2 | LEU | 420 | 94.150  | 45.693 | 46.772 | 1.00 | 185.54 | 1SG3397 |
| ATOM | 3397 | CD1 | LEU | 420 | 94.256  | 46.811 | 44.507 | 1.00 | 185.54 | 1SG3398 |
| ATOM | 3398 | C   | LEU | 420 | 96.364  | 43.821 | 47.176 | 1.00 | 185.54 | 1SG3399 |
| ATOM | 3399 | O   | LEU | 420 | 96.003  | 44.270 | 48.265 | 1.00 | 185.54 | 1SG3400 |
| ATOM | 3400 | N   | GLN | 421 | 96.085  | 42.559 | 46.811 | 1.00 | 130.11 | 1SG3401 |
| ATOM | 3401 | CA  | GLN | 421 | 95.198  | 41.720 | 47.577 | 1.00 | 130.11 | 1SG3402 |
| ATOM | 3402 | CB  | GLN | 421 | 95.013  | 40.328 | 46.947 | 1.00 | 130.11 | 1SG3403 |
| ATOM | 3403 | CG  | GLN | 421 | 94.076  | 39.410 | 47.734 | 1.00 | 130.11 | 1SG3404 |
| ATOM | 3404 | CD  | GLN | 421 | 92.669  | 39.985 | 47.666 | 1.00 | 130.11 | 1SG3405 |
| ATOM | 3405 | OE1 | GLN | 421 | 92.369  | 40.993 | 48.304 | 1.00 | 130.11 | 1SG3406 |
| ATOM | 3406 | NE2 | GLN | 421 | 91.778  | 39.326 | 46.878 | 1.00 | 130.11 | 1SG3407 |



## Supplementary material 1.txt

|      |      |     |     |     |         |        |        |            |         |
|------|------|-----|-----|-----|---------|--------|--------|------------|---------|
| ATOM | 3407 | C   | GLN | 421 | 95.717  | 41.518 | 48.967 | 1.00130.11 | 1SG3408 |
| ATOM | 3408 | O   | GLN | 421 | 94.941  | 41.466 | 49.921 | 1.00130.11 | 1SG3409 |
| ATOM | 3409 | N   | ASP | 422 | 97.043  | 41.401 | 49.123 | 1.00 46.20 | 1SG3410 |
| ATOM | 3410 | CA  | ASP | 422 | 97.606  | 41.123 | 50.412 | 1.00 46.20 | 1SG3411 |
| ATOM | 3411 | CB  | ASP | 422 | 99.145  | 41.088 | 50.389 | 1.00 46.20 | 1SG3412 |
| ATOM | 3412 | CG  | ASP | 422 | 99.605  | 39.894 | 49.565 | 1.00 46.20 | 1SG3413 |
| ATOM | 3413 | OD1 | ASP | 422 | 99.094  | 38.768 | 49.808 | 1.00 46.20 | 1SG3414 |
| ATOM | 3414 | OD2 | ASP | 422 | 100.488 | 40.091 | 48.688 | 1.00 46.20 | 1SG3415 |
| ATOM | 3415 | C   | ASP | 422 | 97.221  | 42.218 | 51.350 | 1.00 46.20 | 1SG3416 |
| ATOM | 3416 | O   | ASP | 422 | 96.868  | 41.961 | 52.499 | 1.00 46.20 | 1SG3417 |
| ATOM | 3417 | N   | ALA | 423 | 97.289  | 43.474 | 50.880 | 1.00 36.58 | 1SG3418 |
| ATOM | 3418 | CA  | ALA | 423 | 96.990  | 44.597 | 51.718 | 1.00 36.58 | 1SG3419 |
| ATOM | 3419 | CB  | ALA | 423 | 97.226  | 45.941 | 51.008 | 1.00 36.58 | 1SG3420 |
| ATOM | 3420 | C   | ALA | 423 | 95.556  | 44.564 | 52.136 | 1.00 36.58 | 1SG3421 |
| ATOM | 3421 | O   | ALA | 423 | 95.240  | 44.813 | 53.298 | 1.00 36.58 | 1SG3422 |
| ATOM | 3422 | N   | GLU | 424 | 94.644  | 44.237 | 51.203 | 1.00 69.61 | 1SG3423 |
| ATOM | 3423 | CA  | GLU | 424 | 93.251  | 44.289 | 51.541 | 1.00 69.61 | 1SG3424 |
| ATOM | 3424 | CB  | GLU | 424 | 92.310  | 43.974 | 50.365 | 1.00 69.61 | 1SG3425 |
| ATOM | 3425 | CG  | GLU | 424 | 90.830  | 44.119 | 50.738 | 1.00 69.61 | 1SG3426 |
| ATOM | 3426 | CD  | GLU | 424 | 89.985  | 43.861 | 49.499 | 1.00 69.61 | 1SG3427 |
| ATOM | 3427 | OE1 | GLU | 424 | 90.549  | 43.921 | 48.374 | 1.00 69.61 | 1SG3428 |
| ATOM | 3428 | OE2 | GLU | 424 | 88.762  | 43.603 | 49.661 | 1.00 69.61 | 1SG3429 |
| ATOM | 3429 | C   | GLU | 424 | 92.974  | 43.301 | 52.625 | 1.00 69.61 | 1SG3430 |
| ATOM | 3430 | O   | GLU | 424 | 92.216  | 43.585 | 53.550 | 1.00 69.61 | 1SG3431 |
| ATOM | 3431 | N   | TRP | 425 | 93.593  | 42.111 | 52.547 | 1.00 53.91 | 1SG3432 |
| ATOM | 3432 | CA  | TRP | 425 | 93.344  | 41.096 | 53.529 | 1.00 53.91 | 1SG3433 |
| ATOM | 3433 | CB  | TRP | 425 | 94.042  | 39.768 | 53.206 | 1.00 53.91 | 1SG3434 |
| ATOM | 3434 | CG  | TRP | 425 | 93.411  | 39.044 | 52.042 | 1.00 53.91 | 1SG3435 |
| ATOM | 3435 | CD2 | TRP | 425 | 93.948  | 37.854 | 51.449 | 1.00 53.91 | 1SG3436 |
| ATOM | 3436 | CD1 | TRP | 425 | 92.269  | 39.337 | 51.356 | 1.00 53.91 | 1SG3437 |
| ATOM | 3437 | NE1 | TRP | 425 | 92.056  | 38.397 | 50.376 | 1.00 53.91 | 1SG3438 |
| ATOM | 3438 | CE2 | TRP | 425 | 93.083  | 37.478 | 50.420 | 1.00 53.91 | 1SG3439 |
| ATOM | 3439 | CE3 | TRP | 425 | 95.069  | 37.131 | 51.740 | 1.00 53.91 | 1SG3440 |
| ATOM | 3440 | CZ2 | TRP | 425 | 93.327  | 36.367 | 49.665 | 1.00 53.91 | 1SG3441 |
| ATOM | 3441 | CZ3 | TRP | 425 | 95.315  | 36.014 | 50.973 | 1.00 53.91 | 1SG3442 |
| ATOM | 3442 | CH2 | TRP | 425 | 94.460  | 35.641 | 49.957 | 1.00 53.91 | 1SG3443 |
| ATOM | 3443 | C   | TRP | 425 | 93.812  | 41.576 | 54.863 | 1.00 53.91 | 1SG3444 |
| ATOM | 3444 | O   | TRP | 425 | 93.175  | 41.312 | 55.882 | 1.00 53.91 | 1SG3445 |
| ATOM | 3445 | N   | ILE | 426 | 94.952  | 42.289 | 54.890 | 1.00 81.95 | 1SG3446 |
| ATOM | 3446 | CA  | ILE | 426 | 95.484  | 42.767 | 56.131 | 1.00 81.95 | 1SG3447 |
| ATOM | 3447 | CB  | ILE | 426 | 96.786  | 43.493 | 55.962 | 1.00 81.95 | 1SG3448 |
| ATOM | 3448 | CG2 | ILE | 426 | 97.171  | 44.093 | 57.325 | 1.00 81.95 | 1SG3449 |
| ATOM | 3449 | CG1 | ILE | 426 | 97.854  | 42.551 | 55.382 | 1.00 81.95 | 1SG3450 |
| ATOM | 3450 | CD1 | ILE | 426 | 98.147  | 41.344 | 56.271 | 1.00 81.95 | 1SG3451 |
| ATOM | 3451 | C   | ILE | 426 | 94.513  | 43.729 | 56.747 | 1.00 81.95 | 1SG3452 |
| ATOM | 3452 | O   | ILE | 426 | 94.250  | 43.668 | 57.947 | 1.00 81.95 | 1SG3453 |
| ATOM | 3453 | N   | ALA | 427 | 93.953  | 44.651 | 55.940 | 1.00 33.18 | 1SG3454 |
| ATOM | 3454 | CA  | ALA | 427 | 93.056  | 45.646 | 56.463 | 1.00 33.18 | 1SG3455 |
| ATOM | 3455 | CB  | ALA | 427 | 92.605  | 46.659 | 55.398 | 1.00 33.18 | 1SG3456 |
| ATOM | 3456 | C   | ALA | 427 | 91.822  | 45.000 | 57.012 | 1.00 33.18 | 1SG3457 |
| ATOM | 3457 | O   | ALA | 427 | 91.375  | 45.330 | 58.109 | 1.00 33.18 | 1SG3458 |
| ATOM | 3458 | N   | THR | 428 | 91.248  | 44.044 | 56.260 | 1.00 99.33 | 1SG3459 |
| ATOM | 3459 | CA  | THR | 428 | 90.043  | 43.380 | 56.664 | 1.00 99.33 | 1SG3460 |
| ATOM | 3460 | CB  | THR | 428 | 89.523  | 42.420 | 55.633 | 1.00 99.33 | 1SG3461 |
| ATOM | 3461 | OG1 | THR | 428 | 90.465  | 41.381 | 55.415 | 1.00 99.33 | 1SG3462 |
| ATOM | 3462 | CG2 | THR | 428 | 89.260  | 43.186 | 54.325 | 1.00 99.33 | 1SG3463 |
| ATOM | 3463 | C   | THR | 428 | 90.342  | 42.590 | 57.893 | 1.00 99.33 | 1SG3464 |
| ATOM | 3464 | O   | THR | 428 | 89.504  | 42.468 | 58.785 | 1.00 99.33 | 1SG3465 |
| ATOM | 3465 | N   | GLY | 429 | 91.565  | 42.036 | 57.976 | 1.00 23.50 | 1SG3466 |
| ATOM | 3466 | CA  | GLY | 429 | 91.899  | 41.212 | 59.096 | 1.00 23.50 | 1SG3467 |
| ATOM | 3467 | C   | GLY | 429 | 91.477  | 39.830 | 58.734 | 1.00 23.50 | 1SG3468 |
| ATOM | 3468 | O   | GLY | 429 | 91.233  | 38.990 | 59.599 | 1.00 23.50 | 1SG3469 |
| ATOM | 3469 | N   | HIS | 430 | 91.363  | 39.572 | 57.418 | 1.00 81.55 | 1SG3470 |
| ATOM | 3470 | CA  | HIS | 430 | 90.913  | 38.295 | 56.958 | 1.00 81.55 | 1SG3471 |
| ATOM | 3471 | ND1 | HIS | 430 | 88.656  | 36.482 | 55.394 | 1.00 81.55 | 1SG3472 |
| ATOM | 3472 | CG  | HIS | 430 | 89.875  | 37.004 | 55.021 | 1.00 81.55 | 1SG3473 |
| ATOM | 3473 | CB  | HIS | 430 | 90.415  | 38.321 | 55.500 | 1.00 81.55 | 1SG3474 |
| ATOM | 3474 | NE2 | HIS | 430 | 89.576  | 35.015 | 53.999 | 1.00 81.55 | 1SG3475 |
| ATOM | 3475 | CD2 | HIS | 430 | 90.423  | 36.096 | 54.168 | 1.00 81.55 | 1SG3476 |
| ATOM | 3476 | CE1 | HIS | 430 | 88.529  | 35.290 | 54.754 | 1.00 81.55 | 1SG3477 |
| ATOM | 3477 | C   | HIS | 430 | 92.014  | 37.289 | 57.061 | 1.00 81.55 | 1SG3478 |

## Supplementary material 1.txt

|      |      |     |     |     |         |        |        |      |        |         |
|------|------|-----|-----|-----|---------|--------|--------|------|--------|---------|
| ATOM | 3478 | O   | HIS | 430 | 93.174  | 37.575 | 56.763 | 1.00 | 81.55  | 1SG3479 |
| ATOM | 3479 | N   | VAL | 431 | 91.659  | 36.076 | 57.533 | 1.00 | 126.81 | 1SG3480 |
| ATOM | 3480 | CA  | VAL | 431 | 92.569  | 34.972 | 57.555 | 1.00 | 126.81 | 1SG3481 |
| ATOM | 3481 | CB  | VAL | 431 | 92.851  | 34.448 | 58.938 | 1.00 | 126.81 | 1SG3482 |
| ATOM | 3482 | CG1 | VAL | 431 | 91.530  | 34.114 | 59.654 | 1.00 | 126.81 | 1SG3483 |
| ATOM | 3483 | CG2 | VAL | 431 | 93.808  | 33.252 | 58.807 | 1.00 | 126.81 | 1SG3484 |
| ATOM | 3484 | C   | VAL | 431 | 91.938  | 33.897 | 56.719 | 1.00 | 126.81 | 1SG3485 |
| ATOM | 3485 | O   | VAL | 431 | 91.018  | 33.189 | 57.131 | 1.00 | 126.81 | 1SG3486 |
| ATOM | 3486 | N   | PRO | 432 | 92.441  | 33.765 | 55.528 | 1.00 | 81.51  | 1SG3487 |
| ATOM | 3487 | CA  | PRO | 432 | 91.907  | 32.818 | 54.586 | 1.00 | 81.51  | 1SG3488 |
| ATOM | 3488 | CD  | PRO | 432 | 93.143  | 34.856 | 54.874 | 1.00 | 81.51  | 1SG3489 |
| ATOM | 3489 | CB  | PRO | 432 | 92.307  | 33.329 | 53.201 | 1.00 | 81.51  | 1SG3490 |
| ATOM | 3490 | CG  | PRO | 432 | 93.454  | 34.317 | 53.470 | 1.00 | 81.51  | 1SG3491 |
| ATOM | 3491 | C   | PRO | 432 | 92.390  | 31.432 | 54.849 | 1.00 | 81.51  | 1SG3492 |
| ATOM | 3492 | O   | PRO | 432 | 93.346  | 31.251 | 55.600 | 1.00 | 81.51  | 1SG3493 |
| ATOM | 3493 | N   | THR | 433 | 91.726  | 30.437 | 54.236 | 1.00 | 110.80 | 1SG3494 |
| ATOM | 3494 | CA  | THR | 433 | 92.153  | 29.082 | 54.369 | 1.00 | 110.80 | 1SG3495 |
| ATOM | 3495 | CB  | THR | 433 | 91.154  | 28.117 | 53.811 | 1.00 | 110.80 | 1SG3496 |
| ATOM | 3496 | OG1 | THR | 433 | 91.609  | 26.782 | 53.959 | 1.00 | 110.80 | 1SG3497 |
| ATOM | 3497 | CG2 | THR | 433 | 90.903  | 28.463 | 52.338 | 1.00 | 110.80 | 1SG3498 |
| ATOM | 3498 | C   | THR | 433 | 93.441  | 28.959 | 53.622 | 1.00 | 110.80 | 1SG3499 |
| ATOM | 3499 | O   | THR | 433 | 93.773  | 29.801 | 52.789 | 1.00 | 110.80 | 1SG3500 |
| ATOM | 3500 | N   | PHE | 434 | 94.194  | 27.882 | 53.905 | 1.00 | 89.99  | 1SG3501 |
| ATOM | 3501 | CA  | PHE | 434 | 95.519  | 27.707 | 53.382 | 1.00 | 89.99  | 1SG3502 |
| ATOM | 3502 | CB  | PHE | 434 | 96.156  | 26.390 | 53.865 | 1.00 | 89.99  | 1SG3503 |
| ATOM | 3503 | CG  | PHE | 434 | 97.620  | 26.441 | 53.599 | 1.00 | 89.99  | 1SG3504 |
| ATOM | 3504 | CD1 | PHE | 434 | 98.443  | 27.153 | 54.440 | 1.00 | 89.99  | 1SG3505 |
| ATOM | 3505 | CD2 | PHE | 434 | 98.174  | 25.767 | 52.536 | 1.00 | 89.99  | 1SG3506 |
| ATOM | 3506 | CE1 | PHE | 434 | 99.797  | 27.211 | 54.216 | 1.00 | 89.99  | 1SG3507 |
| ATOM | 3507 | CE2 | PHE | 434 | 99.530  | 25.823 | 52.311 | 1.00 | 89.99  | 1SG3508 |
| ATOM | 3508 | CZ  | PHE | 434 | 100.346 | 26.545 | 53.148 | 1.00 | 89.99  | 1SG3509 |
| ATOM | 3509 | C   | PHE | 434 | 95.466  | 27.689 | 51.886 | 1.00 | 89.99  | 1SG3510 |
| ATOM | 3510 | O   | PHE | 434 | 96.287  | 28.326 | 51.225 | 1.00 | 89.99  | 1SG3511 |
| ATOM | 3511 | N   | ASP | 435 | 94.490  | 26.971 | 51.300 | 1.00 | 79.63  | 1SG3512 |
| ATOM | 3512 | CA  | ASP | 435 | 94.455  | 26.893 | 49.870 | 1.00 | 79.63  | 1SG3513 |
| ATOM | 3513 | CB  | ASP | 435 | 93.388  | 25.922 | 49.328 | 1.00 | 79.63  | 1SG3514 |
| ATOM | 3514 | CG  | ASP | 435 | 92.037  | 26.298 | 49.906 | 1.00 | 79.63  | 1SG3515 |
| ATOM | 3515 | OD1 | ASP | 435 | 91.906  | 26.209 | 51.156 | 1.00 | 79.63  | 1SG3516 |
| ATOM | 3516 | OD2 | ASP | 435 | 91.123  | 26.672 | 49.123 | 1.00 | 79.63  | 1SG3517 |
| ATOM | 3517 | C   | ASP | 435 | 94.259  | 28.254 | 49.268 | 1.00 | 79.63  | 1SG3518 |
| ATOM | 3518 | O   | ASP | 435 | 94.913  | 28.584 | 48.280 | 1.00 | 79.63  | 1SG3519 |
| ATOM | 3519 | N   | GLU | 436 | 93.371  | 29.090 | 49.841 | 1.00 | 32.34  | 1SG3520 |
| ATOM | 3520 | CA  | GLU | 436 | 93.125  | 30.393 | 49.280 | 1.00 | 32.34  | 1SG3521 |
| ATOM | 3521 | CB  | GLU | 436 | 91.974  | 31.146 | 49.971 | 1.00 | 32.34  | 1SG3522 |
| ATOM | 3522 | CG  | GLU | 436 | 91.643  | 32.481 | 49.298 | 1.00 | 32.34  | 1SG3523 |
| ATOM | 3523 | CD  | GLU | 436 | 90.498  | 33.135 | 50.059 | 1.00 | 32.34  | 1SG3524 |
| ATOM | 3524 | OE1 | GLU | 436 | 89.945  | 32.475 | 50.979 | 1.00 | 32.34  | 1SG3525 |
| ATOM | 3525 | OE2 | GLU | 436 | 90.164  | 34.305 | 49.732 | 1.00 | 32.34  | 1SG3526 |
| ATOM | 3526 | C   | GLU | 436 | 94.353  | 31.247 | 49.411 | 1.00 | 32.34  | 1SG3527 |
| ATOM | 3527 | O   | GLU | 436 | 94.701  | 31.996 | 48.499 | 1.00 | 32.34  | 1SG3528 |
| ATOM | 3528 | N   | TYR | 437 | 95.051  | 31.137 | 50.555 | 1.00 | 70.56  | 1SG3529 |
| ATOM | 3529 | CA  | TYR | 437 | 96.199  | 31.951 | 50.851 | 1.00 | 70.56  | 1SG3530 |
| ATOM | 3530 | CB  | TYR | 437 | 96.785  | 31.603 | 52.236 | 1.00 | 70.56  | 1SG3531 |
| ATOM | 3531 | CG  | TYR | 437 | 98.138  | 32.210 | 52.409 | 1.00 | 70.56  | 1SG3532 |
| ATOM | 3532 | CD1 | TYR | 437 | 98.301  | 33.540 | 52.725 | 1.00 | 70.56  | 1SG3533 |
| ATOM | 3533 | CD2 | TYR | 437 | 99.258  | 31.422 | 52.275 | 1.00 | 70.56  | 1SG3534 |
| ATOM | 3534 | CE1 | TYR | 437 | 99.562  | 34.070 | 52.888 | 1.00 | 70.56  | 1SG3535 |
| ATOM | 3535 | CE2 | TYR | 437 | 100.519 | 31.946 | 52.437 | 1.00 | 70.56  | 1SG3536 |
| ATOM | 3536 | CZ  | TYR | 437 | 100.676 | 33.275 | 52.743 | 1.00 | 70.56  | 1SG3537 |
| ATOM | 3537 | OH  | TYR | 437 | 101.972 | 33.812 | 52.910 | 1.00 | 70.56  | 1SG3538 |
| ATOM | 3538 | C   | TYR | 437 | 97.264  | 31.728 | 49.823 | 1.00 | 70.56  | 1SG3539 |
| ATOM | 3539 | O   | TYR | 437 | 97.836  | 32.684 | 49.296 | 1.00 | 70.56  | 1SG3540 |
| ATOM | 3540 | N   | LEU | 438 | 97.525  | 30.451 | 49.489 | 1.00 | 49.49  | 1SG3541 |
| ATOM | 3541 | CA  | LEU | 438 | 98.577  | 30.082 | 48.585 | 1.00 | 49.49  | 1SG3542 |
| ATOM | 3542 | CB  | LEU | 438 | 98.721  | 28.561 | 48.409 | 1.00 | 49.49  | 1SG3543 |
| ATOM | 3543 | CG  | LEU | 438 | 99.163  | 27.823 | 49.684 | 1.00 | 49.49  | 1SG3544 |
| ATOM | 3544 | CD2 | LEU | 438 | 100.411 | 28.472 | 50.306 | 1.00 | 49.49  | 1SG3545 |
| ATOM | 3545 | CD1 | LEU | 438 | 99.339  | 26.320 | 49.414 | 1.00 | 49.49  | 1SG3546 |
| ATOM | 3546 | C   | LEU | 438 | 98.311  | 30.643 | 47.230 | 1.00 | 49.49  | 1SG3547 |
| ATOM | 3547 | O   | LEU | 438 | 99.243  | 31.058 | 46.541 | 1.00 | 49.49  | 1SG3548 |
| ATOM | 3548 | N   | ASN | 439 | 97.031  | 30.676 | 46.813 | 1.00 | 88.76  | 1SG3549 |

## Supplementary material 1.txt

|      |      |     |     |     |         |        |        |      |        |         |
|------|------|-----|-----|-----|---------|--------|--------|------|--------|---------|
| ATOM | 3549 | CA  | ASN | 439 | 96.713  | 31.119 | 45.488 | 1.00 | 88.76  | 1SG3550 |
| ATOM | 3550 | CB  | ASN | 439 | 95.194  | 31.202 | 45.247 | 1.00 | 88.76  | 1SG3551 |
| ATOM | 3551 | CG  | ASN | 439 | 94.934  | 31.413 | 43.761 | 1.00 | 88.76  | 1SG3552 |
| ATOM | 3552 | OD1 | ASN | 439 | 93.788  | 31.535 | 43.330 | 1.00 | 88.76  | 1SG3553 |
| ATOM | 3553 | ND2 | ASN | 439 | 96.023  | 31.452 | 42.949 | 1.00 | 88.76  | 1SG3554 |
| ATOM | 3554 | C   | ASN | 439 | 97.273  | 32.496 | 45.320 | 1.00 | 88.76  | 1SG3555 |
| ATOM | 3555 | O   | ASN | 439 | 97.880  | 32.801 | 44.296 | 1.00 | 88.76  | 1SG3556 |
| ATOM | 3556 | N   | ASN | 440 | 97.046  | 33.372 | 46.315 | 1.00 | 75.96  | 1SG3557 |
| ATOM | 3557 | CA  | ASN | 440 | 97.554  | 34.719 | 46.287 | 1.00 | 75.96  | 1SG3558 |
| ATOM | 3558 | CB  | ASN | 440 | 96.773  | 35.649 | 47.230 | 1.00 | 75.96  | 1SG3559 |
| ATOM | 3559 | CG  | ASN | 440 | 97.255  | 37.074 | 47.002 | 1.00 | 75.96  | 1SG3560 |
| ATOM | 3560 | OD1 | ASN | 440 | 97.829  | 37.394 | 45.962 | 1.00 | 75.96  | 1SG3561 |
| ATOM | 3561 | ND2 | ASN | 440 | 97.030  | 37.955 | 48.013 | 1.00 | 75.96  | 1SG3562 |
| ATOM | 3562 | C   | ASN | 440 | 99.008  | 34.831 | 46.677 | 1.00 | 75.96  | 1SG3563 |
| ATOM | 3563 | O   | ASN | 440 | 99.781  | 35.548 | 46.041 | 1.00 | 75.96  | 1SG3564 |
| ATOM | 3564 | N   | GLY | 441 | 99.403  | 34.116 | 47.751 | 1.00 | 65.35  | 1SG3565 |
| ATOM | 3565 | CA  | GLY | 441 | 100.689 | 34.221 | 48.392 | 1.00 | 65.35  | 1SG3566 |
| ATOM | 3566 | C   | GLY | 441 | 101.823 | 33.769 | 47.532 | 1.00 | 65.35  | 1SG3567 |
| ATOM | 3567 | O   | GLY | 441 | 102.949 | 34.229 | 47.706 | 1.00 | 65.35  | 1SG3568 |
| ATOM | 3568 | N   | THR | 442 | 101.601 | 32.797 | 46.636 | 1.00 | 138.02 | 1SG3569 |
| ATOM | 3569 | CA  | THR | 442 | 102.722 | 32.331 | 45.883 | 1.00 | 138.02 | 1SG3570 |
| ATOM | 3570 | CB  | THR | 442 | 102.486 | 31.045 | 45.116 | 1.00 | 138.02 | 1SG3571 |
| ATOM | 3571 | OG1 | THR | 442 | 101.415 | 31.144 | 44.192 | 1.00 | 138.02 | 1SG3572 |
| ATOM | 3572 | CG2 | THR | 442 | 102.186 | 29.935 | 46.136 | 1.00 | 138.02 | 1SG3573 |
| ATOM | 3573 | C   | THR | 442 | 103.287 | 33.411 | 45.000 | 1.00 | 138.02 | 1SG3574 |
| ATOM | 3574 | O   | THR | 442 | 104.505 | 33.457 | 44.864 | 1.00 | 138.02 | 1SG3575 |
| ATOM | 3575 | N   | PRO | 443 | 102.533 | 34.276 | 44.369 | 1.00 | 155.15 | 1SG3576 |
| ATOM | 3576 | CA  | PRO | 443 | 103.131 | 35.297 | 43.541 | 1.00 | 155.15 | 1SG3577 |
| ATOM | 3577 | CD  | PRO | 443 | 101.177 | 33.966 | 43.944 | 1.00 | 155.15 | 1SG3578 |
| ATOM | 3578 | CB  | PRO | 443 | 102.003 | 35.856 | 42.675 | 1.00 | 155.15 | 1SG3579 |
| ATOM | 3579 | CG  | PRO | 443 | 100.978 | 34.712 | 42.616 | 1.00 | 155.15 | 1SG3580 |
| ATOM | 3580 | C   | PRO | 443 | 103.847 | 36.378 | 44.297 | 1.00 | 155.15 | 1SG3581 |
| ATOM | 3581 | O   | PRO | 443 | 104.740 | 37.004 | 43.728 | 1.00 | 155.15 | 1SG3582 |
| ATOM | 3582 | N   | ASN | 444 | 103.482 | 36.615 | 45.571 | 1.00 | 131.61 | 1SG3583 |
| ATOM | 3583 | CA  | ASN | 444 | 104.030 | 37.703 | 46.337 | 1.00 | 131.61 | 1SG3584 |
| ATOM | 3584 | CB  | ASN | 444 | 103.348 | 37.949 | 47.704 | 1.00 | 131.61 | 1SG3585 |
| ATOM | 3585 | CG  | ASN | 444 | 103.491 | 36.746 | 48.622 | 1.00 | 131.61 | 1SG3586 |
| ATOM | 3586 | OD1 | ASN | 444 | 104.542 | 36.117 | 48.724 | 1.00 | 131.61 | 1SG3587 |
| ATOM | 3587 | ND2 | ASN | 444 | 102.374 | 36.402 | 49.319 | 1.00 | 131.61 | 1SG3588 |
| ATOM | 3588 | C   | ASN | 444 | 105.487 | 37.471 | 46.539 | 1.00 | 131.61 | 1SG3589 |
| ATOM | 3589 | O   | ASN | 444 | 106.233 | 38.400 | 46.844 | 1.00 | 131.61 | 1SG3590 |
| ATOM | 3590 | N   | THR | 445 | 105.918 | 36.203 | 46.433 | 1.00 | 145.09 | 1SG3591 |
| ATOM | 3591 | CA  | THR | 445 | 107.305 | 35.895 | 46.557 | 1.00 | 145.09 | 1SG3592 |
| ATOM | 3592 | CB  | THR | 445 | 107.628 | 34.434 | 46.540 | 1.00 | 145.09 | 1SG3593 |
| ATOM | 3593 | OG1 | THR | 445 | 109.026 | 34.275 | 46.669 | 1.00 | 145.09 | 1SG3594 |
| ATOM | 3594 | CG2 | THR | 445 | 107.183 | 33.802 | 45.224 | 1.00 | 145.09 | 1SG3595 |
| ATOM | 3595 | C   | THR | 445 | 108.025 | 36.555 | 45.423 | 1.00 | 145.09 | 1SG3596 |
| ATOM | 3596 | O   | THR | 445 | 109.209 | 36.860 | 45.542 | 1.00 | 145.09 | 1SG3597 |
| ATOM | 3597 | N   | GLY | 446 | 107.345 | 36.730 | 44.270 | 1.00 | 37.55  | 1SG3598 |
| ATOM | 3598 | CA  | GLY | 446 | 107.909 | 37.427 | 43.147 | 1.00 | 37.55  | 1SG3599 |
| ATOM | 3599 | C   | GLY | 446 | 108.693 | 36.468 | 42.314 | 1.00 | 37.55  | 1SG3600 |
| ATOM | 3600 | O   | GLY | 446 | 109.318 | 36.855 | 41.329 | 1.00 | 37.55  | 1SG3601 |
| ATOM | 3601 | N   | MET | 447 | 108.656 | 35.180 | 42.691 | 1.00 | 130.88 | 1SG3602 |
| ATOM | 3602 | CA  | MET | 447 | 109.422 | 34.147 | 42.059 | 1.00 | 130.88 | 1SG3603 |
| ATOM | 3603 | CB  | MET | 447 | 109.302 | 32.825 | 42.839 | 1.00 | 130.88 | 1SG3604 |
| ATOM | 3604 | CG  | MET | 447 | 110.420 | 31.828 | 42.551 | 1.00 | 130.88 | 1SG3605 |
| ATOM | 3605 | SD  | MET | 447 | 112.049 | 32.325 | 43.195 | 1.00 | 130.88 | 1SG3606 |
| ATOM | 3606 | CE  | MET | 447 | 111.615 | 32.139 | 44.944 | 1.00 | 130.88 | 1SG3607 |
| ATOM | 3607 | C   | MET | 447 | 108.981 | 33.925 | 40.644 | 1.00 | 130.88 | 1SG3608 |
| ATOM | 3608 | O   | MET | 447 | 109.804 | 33.639 | 39.774 | 1.00 | 130.88 | 1SG3609 |
| ATOM | 3609 | N   | CYS | 448 | 107.664 | 34.000 | 40.378 | 1.00 | 94.57  | 1SG3610 |
| ATOM | 3610 | CA  | CYS | 448 | 107.217 | 33.793 | 39.034 | 1.00 | 94.57  | 1SG3611 |
| ATOM | 3611 | CB  | CYS | 448 | 105.686 | 33.775 | 38.909 | 1.00 | 94.57  | 1SG3612 |
| ATOM | 3612 | SG  | CYS | 448 | 105.158 | 33.080 | 37.321 | 1.00 | 94.57  | 1SG3613 |
| ATOM | 3613 | C   | CYS | 448 | 107.749 | 34.926 | 38.217 | 1.00 | 94.57  | 1SG3614 |
| ATOM | 3614 | O   | CYS | 448 | 108.228 | 34.737 | 37.103 | 1.00 | 94.57  | 1SG3615 |
| ATOM | 3615 | N   | VAL | 449 | 107.686 | 36.148 | 38.776 | 1.00 | 51.77  | 1SG3616 |
| ATOM | 3616 | CA  | VAL | 449 | 108.123 | 37.331 | 38.093 | 1.00 | 51.77  | 1SG3617 |
| ATOM | 3617 | CB  | VAL | 449 | 107.881 | 38.573 | 38.899 | 1.00 | 51.77  | 1SG3618 |
| ATOM | 3618 | CG1 | VAL | 449 | 108.423 | 39.780 | 38.113 | 1.00 | 51.77  | 1SG3619 |
| ATOM | 3619 | CG2 | VAL | 449 | 106.381 | 38.654 | 39.228 | 1.00 | 51.77  | 1SG3620 |

## Supplementary material 1.txt

|      |      |     |     |     |         |        |        |            |       |         |
|------|------|-----|-----|-----|---------|--------|--------|------------|-------|---------|
| ATOM | 3620 | C   | VAL | 449 | 109.596 | 37.266 | 37.817 | 1.00       | 51.77 | 1SG3621 |
| ATOM | 3621 | O   | VAL | 449 | 110.041 | 37.480 | 36.690 | 1.00       | 51.77 | 1SG3622 |
| ATOM | 3622 | N   | LEU | 450 | 110.391 | 36.937 | 38.848 | 1.00       | 77.30 | 1SG3623 |
| ATOM | 3623 | CA  | LEU | 450 | 111.823 | 36.914 | 38.774 | 1.00       | 77.30 | 1SG3624 |
| ATOM | 3624 | CB  | LEU | 450 | 112.471 | 36.603 | 40.131 | 1.00       | 77.30 | 1SG3625 |
| ATOM | 3625 | CG  | LEU | 450 | 112.142 | 37.655 | 41.209 | 1.00       | 77.30 | 1SG3626 |
| ATOM | 3626 | CD2 | LEU | 450 | 112.470 | 39.077 | 40.727 | 1.00       | 77.30 | 1SG3627 |
| ATOM | 3627 | CD1 | LEU | 450 | 112.810 | 37.310 | 42.549 | 1.00       | 77.30 | 1SG3628 |
| ATOM | 3628 | C   | LEU | 450 | 112.261 | 35.864 | 37.810 | 1.00       | 77.30 | 1SG3629 |
| ATOM | 3629 | O   | LEU | 450 | 113.299 | 36.038 | 37.187 | 1.00       | 77.30 | 1SG3630 |
| ATOM | 3630 | N   | ASN | 451 | 111.537 | 34.727 | 37.727 | 1.00156.20 |       | 1SG3631 |
| ATOM | 3631 | CA  | ASN | 451 | 111.784 | 33.605 | 36.849 | 1.00156.20 |       | 1SG3632 |
| ATOM | 3632 | CB  | ASN | 451 | 110.844 | 32.422 | 37.137 | 1.00156.20 |       | 1SG3633 |
| ATOM | 3633 | CG  | ASN | 451 | 111.026 | 31.388 | 36.032 | 1.00156.20 |       | 1SG3634 |
| ATOM | 3634 | OD1 | ASN | 451 | 112.047 | 30.715 | 35.912 | 1.00156.20 |       | 1SG3635 |
| ATOM | 3635 | ND2 | ASN | 451 | 109.979 | 31.262 | 35.174 | 1.00156.20 |       | 1SG3636 |
| ATOM | 3636 | C   | ASN | 451 | 111.509 | 33.952 | 35.423 | 1.00156.20 |       | 1SG3637 |
| ATOM | 3637 | O   | ASN | 451 | 112.141 | 33.397 | 34.523 | 1.00156.20 |       | 1SG3638 |
| ATOM | 3638 | N   | LEU | 452 | 110.493 | 34.790 | 35.158 | 1.00       | 79.14 | 1SG3639 |
| ATOM | 3639 | CA  | LEU | 452 | 110.271 | 35.249 | 33.818 | 1.00       | 79.14 | 1SG3640 |
| ATOM | 3640 | CB  | LEU | 452 | 108.896 | 35.897 | 33.571 | 1.00       | 79.14 | 1SG3641 |
| ATOM | 3641 | CG  | LEU | 452 | 107.760 | 34.879 | 33.338 | 1.00       | 79.14 | 1SG3642 |
| ATOM | 3642 | CD2 | LEU | 452 | 106.498 | 35.570 | 32.801 | 1.00       | 79.14 | 1SG3643 |
| ATOM | 3643 | CD1 | LEU | 452 | 107.494 | 34.006 | 34.570 | 1.00       | 79.14 | 1SG3644 |
| ATOM | 3644 | C   | LEU | 452 | 111.330 | 36.231 | 33.425 | 1.00       | 79.14 | 1SG3645 |
| ATOM | 3645 | O   | LEU | 452 | 111.792 | 36.236 | 32.287 | 1.00       | 79.14 | 1SG3646 |
| ATOM | 3646 | N   | ILE | 453 | 111.736 | 37.110 | 34.357 | 1.00178.86 |       | 1SG3647 |
| ATOM | 3647 | CA  | ILE | 453 | 112.713 | 38.122 | 34.047 | 1.00178.86 |       | 1SG3648 |
| ATOM | 3648 | CB  | ILE | 453 | 112.744 | 39.241 | 35.069 | 1.00178.86 |       | 1SG3649 |
| ATOM | 3649 | CG2 | ILE | 453 | 113.019 | 38.654 | 36.452 | 1.00178.86 |       | 1SG3650 |
| ATOM | 3650 | CG1 | ILE | 453 | 113.664 | 40.412 | 34.654 | 1.00178.86 |       | 1SG3651 |
| ATOM | 3651 | CD1 | ILE | 453 | 115.167 | 40.124 | 34.687 | 1.00178.86 |       | 1SG3652 |
| ATOM | 3652 | C   | ILE | 453 | 114.095 | 37.570 | 33.714 | 1.00178.86 |       | 1SG3653 |
| ATOM | 3653 | O   | ILE | 453 | 114.699 | 38.098 | 32.782 | 1.00178.86 |       | 1SG3654 |
| ATOM | 3654 | N   | PRO | 454 | 114.683 | 36.582 | 34.357 | 1.00170.06 |       | 1SG3655 |
| ATOM | 3655 | CA  | PRO | 454 | 116.007 | 36.190 | 33.998 | 1.00170.06 |       | 1SG3656 |
| ATOM | 3656 | CD  | PRO | 454 | 114.004 | 35.374 | 34.630 | 1.00170.06 |       | 1SG3657 |
| ATOM | 3657 | CB  | PRO | 454 | 116.367 | 35.044 | 34.922 | 1.00170.06 |       | 1SG3658 |
| ATOM | 3658 | CG  | PRO | 454 | 115.035 | 34.309 | 35.040 | 1.00170.06 |       | 1SG3659 |
| ATOM | 3659 | C   | PRO | 454 | 116.082 | 35.729 | 32.567 | 1.00170.06 |       | 1SG3660 |
| ATOM | 3660 | O   | PRO | 454 | 117.195 | 35.650 | 32.056 | 1.00170.06 |       | 1SG3661 |
| ATOM | 3661 | N   | LEU | 455 | 114.952 | 35.342 | 31.934 | 1.00151.61 |       | 1SG3662 |
| ATOM | 3662 | CA  | LEU | 455 | 114.899 | 34.881 | 30.580 | 1.00151.61 |       | 1SG3663 |
| ATOM | 3663 | CB  | LEU | 455 | 113.517 | 34.356 | 30.162 | 1.00151.61 |       | 1SG3664 |
| ATOM | 3664 | CG  | LEU | 455 | 113.509 | 33.813 | 28.721 | 1.00151.61 |       | 1SG3665 |
| ATOM | 3665 | CD2 | LEU | 455 | 112.092 | 33.754 | 28.128 | 1.00151.61 |       | 1SG3666 |
| ATOM | 3666 | CD1 | LEU | 455 | 114.273 | 32.481 | 28.644 | 1.00151.61 |       | 1SG3667 |
| ATOM | 3667 | C   | LEU | 455 | 115.187 | 36.027 | 29.661 | 1.00151.61 |       | 1SG3668 |
| ATOM | 3668 | O   | LEU | 455 | 115.684 | 35.829 | 28.555 | 1.00151.61 |       | 1SG3669 |
| ATOM | 3669 | N   | LEU | 456 | 114.867 | 37.260 | 30.095 | 1.00       | 80.16 | 1SG3670 |
| ATOM | 3670 | CA  | LEU | 456 | 114.932 | 38.399 | 29.220 | 1.00       | 80.16 | 1SG3671 |
| ATOM | 3671 | CB  | LEU | 456 | 114.626 | 39.722 | 29.949 | 1.00       | 80.16 | 1SG3672 |
| ATOM | 3672 | CG  | LEU | 456 | 113.206 | 39.804 | 30.548 | 1.00       | 80.16 | 1SG3673 |
| ATOM | 3673 | CD2 | LEU | 456 | 112.123 | 39.497 | 29.502 | 1.00       | 80.16 | 1SG3674 |
| ATOM | 3674 | CD1 | LEU | 456 | 112.977 | 41.151 | 31.254 | 1.00       | 80.16 | 1SG3675 |
| ATOM | 3675 | C   | LEU | 456 | 116.279 | 38.558 | 28.572 | 1.00       | 80.16 | 1SG3676 |
| ATOM | 3676 | O   | LEU | 456 | 116.360 | 38.680 | 27.350 | 1.00       | 80.16 | 1SG3677 |
| ATOM | 3677 | N   | LEU | 457 | 117.386 | 38.597 | 29.330 | 1.00159.21 |       | 1SG3678 |
| ATOM | 3678 | CA  | LEU | 457 | 118.627 | 38.756 | 28.617 | 1.00159.21 |       | 1SG3679 |
| ATOM | 3679 | CB  | LEU | 457 | 119.720 | 39.623 | 29.220 | 1.00159.21 |       | 1SG3680 |
| ATOM | 3680 | CG  | LEU | 457 | 119.362 | 41.118 | 29.238 | 1.00159.21 |       | 1SG3681 |
| ATOM | 3681 | CD2 | LEU | 457 | 117.998 | 41.337 | 29.907 | 1.00159.21 |       | 1SG3682 |
| ATOM | 3682 | CD1 | LEU | 457 | 119.413 | 41.727 | 27.828 | 1.00159.21 |       | 1SG3683 |
| ATOM | 3683 | C   | LEU | 457 | 119.150 | 37.503 | 27.992 | 1.00159.21 |       | 1SG3684 |
| ATOM | 3684 | O   | LEU | 457 | 120.080 | 37.571 | 27.191 | 1.00159.21 |       | 1SG3685 |
| ATOM | 3685 | N   | MET | 458 | 118.638 | 36.320 | 28.390 | 1.00       | 70.12 | 1SG3686 |
| ATOM | 3686 | CA  | MET | 458 | 119.128 | 35.096 | 27.813 | 1.00       | 70.12 | 1SG3687 |
| ATOM | 3687 | CB  | MET | 458 | 118.461 | 33.849 | 28.419 | 1.00       | 70.12 | 1SG3688 |
| ATOM | 3688 | CG  | MET | 458 | 118.746 | 33.654 | 29.909 | 1.00       | 70.12 | 1SG3689 |
| ATOM | 3689 | SD  | MET | 458 | 117.870 | 32.249 | 30.663 | 1.00       | 70.12 | 1SG3690 |
| ATOM | 3690 | CE  | MET | 458 | 118.787 | 30.967 | 29.760 | 1.00       | 70.12 | 1SG3691 |

## Supplementary material 1.txt

|      |      |     |     |     |         |        |        |      |        |         |
|------|------|-----|-----|-----|---------|--------|--------|------|--------|---------|
| ATOM | 3691 | C   | MET | 458 | 118.810 | 35.101 | 26.344 | 1.00 | 70.12  | 1SG3692 |
| ATOM | 3692 | O   | MET | 458 | 117.657 | 34.979 | 25.940 | 1.00 | 70.12  | 1SG3693 |
| ATOM | 3693 | N   | GLY | 459 | 119.856 | 35.169 | 25.500 | 1.00 | 38.14  | 1SG3694 |
| ATOM | 3694 | CA  | GLY | 459 | 119.721 | 35.287 | 24.073 | 1.00 | 38.14  | 1SG3695 |
| ATOM | 3695 | C   | GLY | 459 | 118.995 | 34.105 | 23.508 | 1.00 | 38.14  | 1SG3696 |
| ATOM | 3696 | O   | GLY | 459 | 118.277 | 34.230 | 22.517 | 1.00 | 38.14  | 1SG3697 |
| ATOM | 3697 | N   | GLU | 460 | 119.202 | 32.920 | 24.107 | 1.00 | 118.79 | 1SG3698 |
| ATOM | 3698 | CA  | GLU | 460 | 118.624 | 31.690 | 23.643 | 1.00 | 118.79 | 1SG3699 |
| ATOM | 3699 | CB  | GLU | 460 | 119.175 | 30.455 | 24.377 | 1.00 | 118.79 | 1SG3700 |
| ATOM | 3700 | CG  | GLU | 460 | 119.100 | 30.564 | 25.899 | 1.00 | 118.79 | 1SG3701 |
| ATOM | 3701 | CD  | GLU | 460 | 120.364 | 31.270 | 26.372 | 1.00 | 118.79 | 1SG3702 |
| ATOM | 3702 | OE1 | GLU | 460 | 121.355 | 31.291 | 25.593 | 1.00 | 118.79 | 1SG3703 |
| ATOM | 3703 | OE2 | GLU | 460 | 120.359 | 31.793 | 27.518 | 1.00 | 118.79 | 1SG3704 |
| ATOM | 3704 | C   | GLU | 460 | 117.128 | 31.694 | 23.775 | 1.00 | 118.79 | 1SG3705 |
| ATOM | 3705 | O   | GLU | 460 | 116.446 | 31.038 | 22.991 | 1.00 | 118.79 | 1SG3706 |
| ATOM | 3706 | N   | HIS | 461 | 116.579 | 32.429 | 24.762 | 1.00 | 113.36 | 1SG3707 |
| ATOM | 3707 | CA  | HIS | 461 | 115.170 | 32.439 | 25.071 | 1.00 | 113.36 | 1SG3708 |
| ATOM | 3708 | ND1 | HIS | 461 | 115.459 | 35.671 | 24.622 | 1.00 | 113.36 | 1SG3709 |
| ATOM | 3709 | CG  | HIS | 461 | 114.495 | 34.907 | 25.243 | 1.00 | 113.36 | 1SG3710 |
| ATOM | 3710 | CB  | HIS | 461 | 114.765 | 33.622 | 25.983 | 1.00 | 113.36 | 1SG3711 |
| ATOM | 3711 | NE2 | HIS | 461 | 113.512 | 36.660 | 24.215 | 1.00 | 113.36 | 1SG3712 |
| ATOM | 3712 | CD2 | HIS | 461 | 113.312 | 35.528 | 24.986 | 1.00 | 113.36 | 1SG3713 |
| ATOM | 3713 | CE1 | HIS | 461 | 114.817 | 36.705 | 24.024 | 1.00 | 113.36 | 1SG3714 |
| ATOM | 3714 | C   | HIS | 461 | 114.335 | 32.573 | 23.828 | 1.00 | 113.36 | 1SG3715 |
| ATOM | 3715 | O   | HIS | 461 | 114.612 | 33.387 | 22.946 | 1.00 | 113.36 | 1SG3716 |
| ATOM | 3716 | N   | LEU | 462 | 113.274 | 31.739 | 23.746 | 1.00 | 112.56 | 1SG3717 |
| ATOM | 3717 | CA  | LEU | 462 | 112.346 | 31.757 | 22.650 | 1.00 | 112.56 | 1SG3718 |
| ATOM | 3718 | CB  | LEU | 462 | 112.154 | 30.397 | 21.953 | 1.00 | 112.56 | 1SG3719 |
| ATOM | 3719 | CG  | LEU | 462 | 113.437 | 29.775 | 21.373 | 1.00 | 112.56 | 1SG3720 |
| ATOM | 3720 | CD2 | LEU | 462 | 114.385 | 29.307 | 22.487 | 1.00 | 112.56 | 1SG3721 |
| ATOM | 3721 | CD1 | LEU | 462 | 114.098 | 30.694 | 20.332 | 1.00 | 112.56 | 1SG3722 |
| ATOM | 3722 | C   | LEU | 462 | 111.009 | 32.082 | 23.239 | 1.00 | 112.56 | 1SG3723 |
| ATOM | 3723 | O   | LEU | 462 | 110.843 | 32.123 | 24.456 | 1.00 | 112.56 | 1SG3724 |
| ATOM | 3724 | N   | PRO | 463 | 110.058 | 32.371 | 22.396 | 1.00 | 102.60 | 1SG3725 |
| ATOM | 3725 | CA  | PRO | 463 | 108.732 | 32.633 | 22.878 | 1.00 | 102.60 | 1SG3726 |
| ATOM | 3726 | CD  | PRO | 463 | 110.342 | 33.077 | 21.158 | 1.00 | 102.60 | 1SG3727 |
| ATOM | 3727 | CB  | PRO | 463 | 107.969 | 33.211 | 21.689 | 1.00 | 102.60 | 1SG3728 |
| ATOM | 3728 | CG  | PRO | 463 | 109.072 | 33.889 | 20.852 | 1.00 | 102.60 | 1SG3729 |
| ATOM | 3729 | C   | PRO | 463 | 108.114 | 31.410 | 23.478 | 1.00 | 102.60 | 1SG3730 |
| ATOM | 3730 | O   | PRO | 463 | 107.329 | 31.532 | 24.417 | 1.00 | 102.60 | 1SG3731 |
| ATOM | 3731 | N   | ILE | 464 | 108.448 | 30.228 | 22.934 | 1.00 | 97.46  | 1SG3732 |
| ATOM | 3732 | CA  | ILE | 464 | 107.910 | 28.980 | 23.388 | 1.00 | 97.46  | 1SG3733 |
| ATOM | 3733 | CB  | ILE | 464 | 108.293 | 27.827 | 22.501 | 1.00 | 97.46  | 1SG3734 |
| ATOM | 3734 | CG2 | ILE | 464 | 107.708 | 28.087 | 21.103 | 1.00 | 97.46  | 1SG3735 |
| ATOM | 3735 | CG1 | ILE | 464 | 109.818 | 27.620 | 22.504 | 1.00 | 97.46  | 1SG3736 |
| ATOM | 3736 | CD1 | ILE | 464 | 110.254 | 26.287 | 21.893 | 1.00 | 97.46  | 1SG3737 |
| ATOM | 3737 | C   | ILE | 464 | 108.422 | 28.681 | 24.761 | 1.00 | 97.46  | 1SG3738 |
| ATOM | 3738 | O   | ILE | 464 | 107.682 | 28.215 | 25.626 | 1.00 | 97.46  | 1SG3739 |
| ATOM | 3739 | N   | ASP | 465 | 109.716 | 28.973 | 24.984 | 1.00 | 161.68 | 1SG3740 |
| ATOM | 3740 | CA  | ASP | 465 | 110.434 | 28.581 | 26.160 | 1.00 | 161.68 | 1SG3741 |
| ATOM | 3741 | CB  | ASP | 465 | 111.920 | 28.960 | 26.093 | 1.00 | 161.68 | 1SG3742 |
| ATOM | 3742 | CG  | ASP | 465 | 112.653 | 28.085 | 27.095 | 1.00 | 161.68 | 1SG3743 |
| ATOM | 3743 | OD1 | ASP | 465 | 112.177 | 27.978 | 28.256 | 1.00 | 161.68 | 1SG3744 |
| ATOM | 3744 | OD2 | ASP | 465 | 113.691 | 27.490 | 26.700 | 1.00 | 161.68 | 1SG3745 |
| ATOM | 3745 | C   | ASP | 465 | 109.855 | 29.164 | 27.396 | 1.00 | 161.68 | 1SG3746 |
| ATOM | 3746 | O   | ASP | 465 | 108.764 | 28.812 | 27.841 | 1.00 | 161.68 | 1SG3747 |
| ATOM | 3747 | N   | ILE | 466 | 110.611 | 30.071 | 28.017 | 1.00 | 135.68 | 1SG3748 |
| ATOM | 3748 | CA  | ILE | 466 | 110.140 | 30.615 | 29.242 | 1.00 | 135.68 | 1SG3749 |
| ATOM | 3749 | CB  | ILE | 466 | 111.065 | 31.611 | 29.868 | 1.00 | 135.68 | 1SG3750 |
| ATOM | 3750 | CG2 | ILE | 466 | 110.324 | 32.254 | 31.052 | 1.00 | 135.68 | 1SG3751 |
| ATOM | 3751 | CG1 | ILE | 466 | 112.379 | 30.927 | 30.274 | 1.00 | 135.68 | 1SG3752 |
| ATOM | 3752 | CD1 | ILE | 466 | 112.193 | 29.809 | 31.297 | 1.00 | 135.68 | 1SG3753 |
| ATOM | 3753 | C   | ILE | 466 | 108.851 | 31.292 | 28.963 | 1.00 | 135.68 | 1SG3754 |
| ATOM | 3754 | O   | ILE | 466 | 107.972 | 31.305 | 29.814 | 1.00 | 135.68 | 1SG3755 |
| ATOM | 3755 | N   | LEU | 467 | 108.686 | 31.894 | 27.775 | 1.00 | 105.51 | 1SG3756 |
| ATOM | 3756 | CA  | LEU | 467 | 107.474 | 32.637 | 27.685 | 1.00 | 105.51 | 1SG3757 |
| ATOM | 3757 | CB  | LEU | 467 | 107.381 | 33.467 | 26.392 | 1.00 | 105.51 | 1SG3758 |
| ATOM | 3758 | CG  | LEU | 467 | 108.476 | 34.546 | 26.277 | 1.00 | 105.51 | 1SG3759 |
| ATOM | 3759 | CD2 | LEU | 467 | 108.634 | 35.340 | 27.586 | 1.00 | 105.51 | 1SG3760 |
| ATOM | 3760 | CD1 | LEU | 467 | 108.251 | 35.439 | 25.046 | 1.00 | 105.51 | 1SG3761 |
| ATOM | 3761 | C   | LEU | 467 | 106.259 | 31.765 | 27.751 | 1.00 | 105.51 | 1SG3762 |

## Supplementary material 1.txt

|      |      |     |     |     |         |        |        |            |         |
|------|------|-----|-----|-----|---------|--------|--------|------------|---------|
| ATOM | 3762 | O   | LEU | 467 | 105.485 | 31.851 | 28.705 | 1.00105.51 | 1SG3763 |
| ATOM | 3763 | N   | GLU | 468 | 106.103 | 30.849 | 26.778 | 1.00 73.64 | 1SG3764 |
| ATOM | 3764 | CA  | GLU | 468 | 104.894 | 30.080 | 26.734 | 1.00 73.64 | 1SG3765 |
| ATOM | 3765 | CB  | GLU | 468 | 104.718 | 29.299 | 25.421 | 1.00 73.64 | 1SG3766 |
| ATOM | 3766 | CG  | GLU | 468 | 104.461 | 30.195 | 24.209 | 1.00 73.64 | 1SG3767 |
| ATOM | 3767 | CD  | GLU | 468 | 104.152 | 29.299 | 23.020 | 1.00 73.64 | 1SG3768 |
| ATOM | 3768 | OE1 | GLU | 468 | 103.983 | 28.069 | 23.238 | 1.00 73.64 | 1SG3769 |
| ATOM | 3769 | OE2 | GLU | 468 | 104.075 | 29.831 | 21.881 | 1.00 73.64 | 1SG3770 |
| ATOM | 3770 | C   | GLU | 468 | 104.827 | 29.088 | 27.848 | 1.00 73.64 | 1SG3771 |
| ATOM | 3771 | O   | GLU | 468 | 103.832 | 29.011 | 28.565 | 1.00 73.64 | 1SG3772 |
| ATOM | 3772 | N   | GLN | 469 | 105.905 | 28.312 | 28.041 | 1.00143.43 | 1SG3773 |
| ATOM | 3773 | CA  | GLN | 469 | 105.847 | 27.254 | 29.006 | 1.00143.43 | 1SG3774 |
| ATOM | 3774 | CB  | GLN | 469 | 107.073 | 26.329 | 28.961 | 1.00143.43 | 1SG3775 |
| ATOM | 3775 | CG  | GLN | 469 | 106.928 | 25.113 | 29.876 | 1.00143.43 | 1SG3776 |
| ATOM | 3776 | CD  | GLN | 469 | 105.843 | 24.216 | 29.290 | 1.00143.43 | 1SG3777 |
| ATOM | 3777 | OE1 | GLN | 469 | 106.898 | 24.704 | 28.885 | 1.00143.43 | 1SG3778 |
| ATOM | 3778 | NE2 | GLN | 469 | 105.102 | 24.222 | 30.429 | 1.00143.43 | 1SG3779 |
| ATOM | 3779 | C   | GLN | 469 | 105.730 | 27.796 | 30.400 | 1.00143.43 | 1SG3780 |
| ATOM | 3780 | O   | GLN | 469 | 104.958 | 27.277 | 31.205 | 1.00143.43 | 1SG3781 |
| ATOM | 3781 | N   | ILE | 470 | 106.490 | 28.861 | 30.721 | 1.00117.99 | 1SG3782 |
| ATOM | 3782 | CA  | ILE | 470 | 106.520 | 29.389 | 32.063 | 1.00117.99 | 1SG3783 |
| ATOM | 3783 | CB  | ILE | 470 | 107.584 | 30.414 | 32.342 | 1.00117.99 | 1SG3784 |
| ATOM | 3784 | CG2 | ILE | 470 | 107.371 | 30.961 | 33.764 | 1.00117.99 | 1SG3785 |
| ATOM | 3785 | CG1 | ILE | 470 | 108.983 | 29.818 | 32.120 | 1.00117.99 | 1SG3786 |
| ATOM | 3786 | CD1 | ILE | 470 | 109.302 | 28.646 | 33.047 | 1.00117.99 | 1SG3787 |
| ATOM | 3787 | C   | ILE | 470 | 105.204 | 29.996 | 32.460 | 1.00117.99 | 1SG3788 |
| ATOM | 3788 | O   | ILE | 470 | 104.826 | 29.946 | 33.630 | 1.00117.99 | 1SG3789 |
| ATOM | 3789 | N   | PHE | 471 | 104.485 | 30.594 | 31.491 | 1.00121.36 | 1SG3790 |
| ATOM | 3790 | CA  | PHE | 471 | 103.254 | 31.319 | 31.683 | 1.00121.36 | 1SG3791 |
| ATOM | 3791 | CB  | PHE | 471 | 102.664 | 31.813 | 30.349 | 1.00121.36 | 1SG3792 |
| ATOM | 3792 | CG  | PHE | 471 | 101.392 | 32.539 | 30.627 | 1.00121.36 | 1SG3793 |
| ATOM | 3793 | CD1 | PHE | 471 | 101.398 | 33.874 | 30.960 | 1.00121.36 | 1SG3794 |
| ATOM | 3794 | CD2 | PHE | 471 | 100.189 | 31.877 | 30.549 | 1.00121.36 | 1SG3795 |
| ATOM | 3795 | CE1 | PHE | 471 | 100.218 | 34.535 | 31.210 | 1.00121.36 | 1SG3796 |
| ATOM | 3796 | CE2 | PHE | 471 | 99.007  | 32.533 | 30.799 | 1.00121.36 | 1SG3797 |
| ATOM | 3797 | CZ  | PHE | 471 | 99.021  | 33.866 | 31.132 | 1.00121.36 | 1SG3798 |
| ATOM | 3798 | C   | PHE | 471 | 102.227 | 30.430 | 32.319 | 1.00121.36 | 1SG3799 |
| ATOM | 3799 | O   | PHE | 471 | 101.330 | 30.914 | 33.007 | 1.00121.36 | 1SG3800 |
| ATOM | 3800 | N   | LEU | 472 | 102.293 | 29.132 | 31.978 | 1.00162.97 | 1SG3801 |
| ATOM | 3801 | CA  | LEU | 472 | 101.558 | 27.969 | 32.412 | 1.00162.97 | 1SG3802 |
| ATOM | 3802 | CB  | LEU | 472 | 101.615 | 26.799 | 31.414 | 1.00162.97 | 1SG3803 |
| ATOM | 3803 | CG  | LEU | 472 | 100.795 | 27.051 | 30.135 | 1.00162.97 | 1SG3804 |
| ATOM | 3804 | CD2 | LEU | 472 | 100.717 | 25.786 | 29.265 | 1.00162.97 | 1SG3805 |
| ATOM | 3805 | CD1 | LEU | 472 | 101.311 | 28.273 | 29.363 | 1.00162.97 | 1SG3806 |
| ATOM | 3806 | C   | LEU | 472 | 102.036 | 27.462 | 33.752 | 1.00162.97 | 1SG3807 |
| ATOM | 3807 | O   | LEU | 472 | 101.606 | 26.376 | 34.137 | 1.00162.97 | 1SG3808 |
| ATOM | 3808 | N   | PRO | 473 | 102.831 | 28.211 | 34.492 | 1.00147.48 | 1SG3809 |
| ATOM | 3809 | CA  | PRO | 473 | 103.763 | 27.667 | 35.459 | 1.00147.48 | 1SG3810 |
| ATOM | 3810 | CD  | PRO | 473 | 102.116 | 29.308 | 35.133 | 1.00147.48 | 1SG3811 |
| ATOM | 3811 | CB  | PRO | 473 | 103.733 | 28.548 | 36.708 | 1.00147.48 | 1SG3812 |
| ATOM | 3812 | CG  | PRO | 473 | 102.364 | 29.214 | 36.640 | 1.00147.48 | 1SG3813 |
| ATOM | 3813 | C   | PRO | 473 | 103.748 | 26.227 | 35.800 | 1.00147.48 | 1SG3814 |
| ATOM | 3814 | O   | PRO | 473 | 102.819 | 25.715 | 36.422 | 1.00147.48 | 1SG3815 |
| ATOM | 3815 | N   | SER | 474 | 104.860 | 25.592 | 35.392 | 1.00 85.40 | 1SG3816 |
| ATOM | 3816 | CA  | SER | 474 | 105.102 | 24.196 | 35.532 | 1.00 85.40 | 1SG3817 |
| ATOM | 3817 | CB  | SER | 474 | 106.281 | 23.700 | 34.679 | 1.00 85.40 | 1SG3818 |
| ATOM | 3818 | OG  | SER | 474 | 106.468 | 22.304 | 34.856 | 1.00 85.40 | 1SG3819 |
| ATOM | 3819 | C   | SER | 474 | 105.409 | 23.898 | 36.958 | 1.00 85.40 | 1SG3820 |
| ATOM | 3820 | O   | SER | 474 | 105.634 | 24.792 | 37.770 | 1.00 85.40 | 1SG3821 |
| ATOM | 3821 | N   | ARG | 475 | 105.423 | 22.594 | 37.290 | 1.00113.63 | 1SG3822 |
| ATOM | 3822 | CA  | ARG | 475 | 105.673 | 22.182 | 38.636 | 1.00113.63 | 1SG3823 |
| ATOM | 3823 | CB  | ARG | 475 | 105.511 | 20.674 | 38.899 | 1.00113.63 | 1SG3824 |
| ATOM | 3824 | CG  | ARG | 475 | 104.094 | 20.316 | 39.353 | 1.00113.63 | 1SG3825 |
| ATOM | 3825 | CD  | ARG | 475 | 103.871 | 18.830 | 39.639 | 1.00113.63 | 1SG3826 |
| ATOM | 3826 | NE  | ARG | 475 | 103.443 | 18.182 | 38.368 | 1.00113.63 | 1SG3827 |
| ATOM | 3827 | CZ  | ARG | 475 | 102.109 | 18.017 | 38.126 | 1.00113.63 | 1SG3828 |
| ATOM | 3828 | NH1 | ARG | 475 | 101.197 | 18.411 | 39.062 | 1.00113.63 | 1SG3829 |
| ATOM | 3829 | NH2 | ARG | 475 | 101.686 | 17.457 | 36.955 | 1.00113.63 | 1SG3830 |
| ATOM | 3830 | C   | ARG | 475 | 107.037 | 22.603 | 39.075 | 1.00113.63 | 1SG3831 |
| ATOM | 3831 | O   | ARG | 475 | 107.215 | 22.986 | 40.223 | 1.00113.63 | 1SG3832 |
| ATOM | 3832 | N   | PHE | 476 | 108.049 | 22.569 | 38.197 | 1.00 49.28 | 1SG3833 |

## Supplementary material 1.txt

|      |      |     |     |     |         |        |        |      |        |         |
|------|------|-----|-----|-----|---------|--------|--------|------|--------|---------|
| ATOM | 3833 | CA  | PHE | 476 | 109.369 | 22.927 | 38.646 | 1.00 | 49.28  | 1SG3834 |
| ATOM | 3834 | CB  | PHE | 476 | 110.393 | 22.848 | 37.500 | 1.00 | 49.28  | 1SG3835 |
| ATOM | 3835 | CG  | PHE | 476 | 111.730 | 23.227 | 38.031 | 1.00 | 49.28  | 1SG3836 |
| ATOM | 3836 | CD1 | PHE | 476 | 112.505 | 22.303 | 38.692 | 1.00 | 49.28  | 1SG3837 |
| ATOM | 3837 | CD2 | PHE | 476 | 112.213 | 24.504 | 37.856 | 1.00 | 49.28  | 1SG3838 |
| ATOM | 3838 | CE1 | PHE | 476 | 113.742 | 22.650 | 39.181 | 1.00 | 49.28  | 1SG3839 |
| ATOM | 3839 | CE2 | PHE | 476 | 113.448 | 24.857 | 38.341 | 1.00 | 49.28  | 1SG3840 |
| ATOM | 3840 | CZ  | PHE | 476 | 114.213 | 23.929 | 39.007 | 1.00 | 49.28  | 1SG3841 |
| ATOM | 3841 | C   | PHE | 476 | 109.337 | 24.342 | 39.149 | 1.00 | 49.28  | 1SG3842 |
| ATOM | 3842 | O   | PHE | 476 | 109.892 | 24.651 | 40.204 | 1.00 | 49.28  | 1SG3843 |
| ATOM | 3843 | N   | HIS | 477 | 108.688 | 25.243 | 38.389 | 1.00 | 82.78  | 1SG3844 |
| ATOM | 3844 | CA  | HIS | 477 | 108.550 | 26.622 | 38.766 | 1.00 | 82.78  | 1SG3845 |
| ATOM | 3845 | ND1 | HIS | 477 | 106.667 | 29.397 | 38.721 | 1.00 | 82.78  | 1SG3846 |
| ATOM | 3846 | CG  | HIS | 477 | 107.695 | 28.892 | 37.966 | 1.00 | 82.78  | 1SG3847 |
| ATOM | 3847 | CB  | HIS | 477 | 107.872 | 27.437 | 37.651 | 1.00 | 82.78  | 1SG3848 |
| ATOM | 3848 | NE2 | HIS | 477 | 107.906 | 31.132 | 38.095 | 1.00 | 82.78  | 1SG3849 |
| ATOM | 3849 | CD2 | HIS | 477 | 108.447 | 29.967 | 37.589 | 1.00 | 82.78  | 1SG3850 |
| ATOM | 3850 | CE1 | HIS | 477 | 106.838 | 30.746 | 38.768 | 1.00 | 82.78  | 1SG3851 |
| ATOM | 3851 | C   | HIS | 477 | 107.673 | 26.692 | 39.981 | 1.00 | 82.78  | 1SG3852 |
| ATOM | 3852 | O   | HIS | 477 | 107.928 | 27.446 | 40.916 | 1.00 | 82.78  | 1SG3853 |
| ATOM | 3853 | N   | HIS | 478 | 106.600 | 25.888 | 40.005 | 1.00 | 67.41  | 1SG3854 |
| ATOM | 3854 | CA  | HIS | 478 | 105.690 | 25.956 | 41.107 | 1.00 | 67.41  | 1SG3855 |
| ATOM | 3855 | ND1 | HIS | 478 | 102.497 | 26.093 | 42.075 | 1.00 | 67.41  | 1SG3856 |
| ATOM | 3856 | CG  | HIS | 478 | 103.476 | 25.124 | 42.039 | 1.00 | 67.41  | 1SG3857 |
| ATOM | 3857 | CB  | HIS | 478 | 104.495 | 24.998 | 40.944 | 1.00 | 67.41  | 1SG3858 |
| ATOM | 3858 | NE2 | HIS | 478 | 102.227 | 24.849 | 43.899 | 1.00 | 67.41  | 1SG3859 |
| ATOM | 3859 | CD2 | HIS | 478 | 103.296 | 24.373 | 43.160 | 1.00 | 67.41  | 1SG3860 |
| ATOM | 3860 | CE1 | HIS | 478 | 101.779 | 25.882 | 43.208 | 1.00 | 67.41  | 1SG3861 |
| ATOM | 3861 | C   | HIS | 478 | 106.410 | 25.590 | 42.369 | 1.00 | 67.41  | 1SG3862 |
| ATOM | 3862 | O   | HIS | 478 | 106.249 | 26.248 | 43.395 | 1.00 | 67.41  | 1SG3863 |
| ATOM | 3863 | N   | LEU | 479 | 107.230 | 24.525 | 42.328 | 1.00 | 106.92 | 1SG3864 |
| ATOM | 3864 | CA  | LEU | 479 | 107.920 | 24.075 | 43.500 | 1.00 | 106.92 | 1SG3865 |
| ATOM | 3865 | CB  | LEU | 479 | 108.548 | 22.674 | 43.383 | 1.00 | 106.92 | 1SG3866 |
| ATOM | 3866 | CG  | LEU | 479 | 107.518 | 21.521 | 43.516 | 1.00 | 106.92 | 1SG3867 |
| ATOM | 3867 | CD2 | LEU | 479 | 106.558 | 21.398 | 42.331 | 1.00 | 106.92 | 1SG3868 |
| ATOM | 3868 | CD1 | LEU | 479 | 106.757 | 21.587 | 44.845 | 1.00 | 106.92 | 1SG3869 |
| ATOM | 3869 | C   | LEU | 479 | 108.934 | 25.079 | 43.964 | 1.00 | 106.92 | 1SG3870 |
| ATOM | 3870 | O   | LEU | 479 | 109.114 | 25.254 | 45.168 | 1.00 | 106.92 | 1SG3871 |
| ATOM | 3871 | N   | ILE | 480 | 109.625 | 25.775 | 43.040 | 1.00 | 139.56 | 1SG3872 |
| ATOM | 3872 | CA  | ILE | 480 | 110.619 | 26.730 | 43.451 | 1.00 | 139.56 | 1SG3873 |
| ATOM | 3873 | CB  | ILE | 480 | 111.390 | 27.310 | 42.296 | 1.00 | 139.56 | 1SG3874 |
| ATOM | 3874 | CG2 | ILE | 480 | 110.453 | 28.240 | 41.527 | 1.00 | 139.56 | 1SG3875 |
| ATOM | 3875 | CG1 | ILE | 480 | 112.684 | 27.999 | 42.763 | 1.00 | 139.56 | 1SG3876 |
| ATOM | 3876 | CD1 | ILE | 480 | 112.464 | 29.236 | 43.632 | 1.00 | 139.56 | 1SG3877 |
| ATOM | 3877 | C   | ILE | 480 | 109.938 | 27.828 | 44.223 | 1.00 | 139.56 | 1SG3878 |
| ATOM | 3878 | O   | ILE | 480 | 110.450 | 28.298 | 45.237 | 1.00 | 139.56 | 1SG3879 |
| ATOM | 3879 | N   | GLU | 481 | 108.749 | 28.257 | 43.758 | 1.00 | 81.41  | 1SG3880 |
| ATOM | 3880 | CA  | GLU | 481 | 107.987 | 29.319 | 44.348 | 1.00 | 81.41  | 1SG3881 |
| ATOM | 3881 | CB  | GLU | 481 | 106.721 | 29.592 | 43.517 | 1.00 | 81.41  | 1SG3882 |
| ATOM | 3882 | CG  | GLU | 481 | 105.877 | 30.786 | 43.958 | 1.00 | 81.41  | 1SG3883 |
| ATOM | 3883 | CD  | GLU | 481 | 104.695 | 30.854 | 42.997 | 1.00 | 81.41  | 1SG3884 |
| ATOM | 3884 | OE1 | GLU | 481 | 104.351 | 29.790 | 42.414 | 1.00 | 81.41  | 1SG3885 |
| ATOM | 3885 | OE2 | GLU | 481 | 104.126 | 31.964 | 42.824 | 1.00 | 81.41  | 1SG3886 |
| ATOM | 3886 | C   | GLU | 481 | 107.564 | 28.920 | 45.734 | 1.00 | 81.41  | 1SG3887 |
| ATOM | 3887 | O   | GLU | 481 | 107.585 | 29.733 | 46.657 | 1.00 | 81.41  | 1SG3888 |
| ATOM | 3888 | N   | LEU | 482 | 107.170 | 27.647 | 45.916 | 1.00 | 122.45 | 1SG3889 |
| ATOM | 3889 | CA  | LEU | 482 | 106.682 | 27.177 | 47.184 | 1.00 | 122.45 | 1SG3890 |
| ATOM | 3890 | CB  | LEU | 482 | 106.190 | 25.718 | 47.108 | 1.00 | 122.45 | 1SG3891 |
| ATOM | 3891 | CG  | LEU | 482 | 105.525 | 25.145 | 48.382 | 1.00 | 122.45 | 1SG3892 |
| ATOM | 3892 | CD2 | LEU | 482 | 104.274 | 25.951 | 48.761 | 1.00 | 122.45 | 1SG3893 |
| ATOM | 3893 | CD1 | LEU | 482 | 106.509 | 24.973 | 49.552 | 1.00 | 122.45 | 1SG3894 |
| ATOM | 3894 | C   | LEU | 482 | 107.780 | 27.255 | 48.201 | 1.00 | 122.45 | 1SG3895 |
| ATOM | 3895 | O   | LEU | 482 | 107.554 | 27.666 | 49.338 | 1.00 | 122.45 | 1SG3896 |
| ATOM | 3896 | N   | ALA | 483 | 109.008 | 26.866 | 47.817 | 1.00 | 29.74  | 1SG3897 |
| ATOM | 3897 | CA  | ALA | 483 | 110.095 | 26.841 | 48.755 | 1.00 | 29.74  | 1SG3898 |
| ATOM | 3898 | CB  | ALA | 483 | 111.406 | 26.343 | 48.123 | 1.00 | 29.74  | 1SG3899 |
| ATOM | 3899 | C   | ALA | 483 | 110.329 | 28.228 | 49.263 | 1.00 | 29.74  | 1SG3900 |
| ATOM | 3900 | O   | ALA | 483 | 110.536 | 28.436 | 50.458 | 1.00 | 29.74  | 1SG3901 |
| ATOM | 3901 | N   | SER | 484 | 110.287 | 29.225 | 48.364 | 1.00 | 75.54  | 1SG3902 |
| ATOM | 3902 | CA  | SER | 484 | 110.547 | 30.571 | 48.776 | 1.00 | 75.54  | 1SG3903 |
| ATOM | 3903 | CB  | SER | 484 | 110.505 | 31.569 | 47.611 | 1.00 | 75.54  | 1SG3904 |

## Supplementary material 1.txt

|      |      |     |     |     |         |        |        |            |       |         |
|------|------|-----|-----|-----|---------|--------|--------|------------|-------|---------|
| ATOM | 3904 | OG  | SER | 484 | 110.768 | 32.884 | 48.081 | 1.00       | 75.54 | 1SG3905 |
| ATOM | 3905 | C   | SER | 484 | 109.497 | 31.003 | 49.751 | 1.00       | 75.54 | 1SG3906 |
| ATOM | 3906 | O   | SER | 484 | 109.806 | 31.639 | 50.756 | 1.00       | 75.54 | 1SG3907 |
| ATOM | 3907 | N   | ARG | 485 | 108.222 | 30.685 | 49.467 | 1.00154.52 |       | 1SG3908 |
| ATOM | 3908 | CA  | ARG | 485 | 107.141 | 31.120 | 50.306 | 1.00154.52 |       | 1SG3909 |
| ATOM | 3909 | CB  | ARG | 485 | 105.769 | 30.805 | 49.683 | 1.00154.52 |       | 1SG3910 |
| ATOM | 3910 | CG  | ARG | 485 | 104.575 | 31.176 | 50.564 | 1.00154.52 |       | 1SG3911 |
| ATOM | 3911 | CD  | ARG | 485 | 104.590 | 32.627 | 51.046 | 1.00154.52 |       | 1SG3912 |
| ATOM | 3912 | NE  | ARG | 485 | 105.420 | 33.421 | 50.103 | 1.00154.52 |       | 1SG3913 |
| ATOM | 3913 | CZ  | ARG | 485 | 106.093 | 34.519 | 50.556 | 1.00154.52 |       | 1SG3914 |
| ATOM | 3914 | NH1 | ARG | 485 | 106.003 | 34.882 | 51.867 | 1.00154.52 |       | 1SG3915 |
| ATOM | 3915 | NH2 | ARG | 485 | 106.862 | 35.254 | 49.700 | 1.00154.52 |       | 1SG3916 |
| ATOM | 3916 | C   | ARG | 485 | 107.206 | 30.500 | 51.669 | 1.00154.52 |       | 1SG3917 |
| ATOM | 3917 | O   | ARG | 485 | 107.128 | 31.188 | 52.687 | 1.00154.52 |       | 1SG3918 |
| ATOM | 3918 | N   | LEU | 486 | 107.386 | 29.171 | 51.728 | 1.00113.01 |       | 1SG3919 |
| ATOM | 3919 | CA  | LEU | 486 | 107.377 | 28.499 | 52.992 | 1.00113.01 |       | 1SG3920 |
| ATOM | 3920 | CB  | LEU | 486 | 107.347 | 26.983 | 52.848 | 1.00113.01 |       | 1SG3921 |
| ATOM | 3921 | CG  | LEU | 486 | 105.917 | 26.544 | 52.515 | 1.00113.01 |       | 1SG3922 |
| ATOM | 3922 | CD2 | LEU | 486 | 105.776 | 25.025 | 52.586 | 1.00113.01 |       | 1SG3923 |
| ATOM | 3923 | CD1 | LEU | 486 | 105.432 | 27.162 | 51.195 | 1.00113.01 |       | 1SG3924 |
| ATOM | 3924 | C   | LEU | 486 | 108.519 | 28.922 | 53.847 | 1.00113.01 |       | 1SG3925 |
| ATOM | 3925 | O   | LEU | 486 | 108.340 | 29.125 | 55.047 | 1.00113.01 |       | 1SG3926 |
| ATOM | 3926 | N   | VAL | 487 | 109.717 | 29.071 | 53.251 | 1.00       | 98.15 | 1SG3927 |
| ATOM | 3927 | CA  | VAL | 487 | 110.875 | 29.441 | 54.008 | 1.00       | 98.15 | 1SG3928 |
| ATOM | 3928 | CB  | VAL | 487 | 112.131 | 29.437 | 53.181 | 1.00       | 98.15 | 1SG3929 |
| ATOM | 3929 | CG1 | VAL | 487 | 112.387 | 27.995 | 52.713 | 1.00       | 98.15 | 1SG3930 |
| ATOM | 3930 | CG2 | VAL | 487 | 111.979 | 30.438 | 52.023 | 1.00       | 98.15 | 1SG3931 |
| ATOM | 3931 | C   | VAL | 487 | 110.681 | 30.815 | 54.577 | 1.00       | 98.15 | 1SG3932 |
| ATOM | 3932 | O   | VAL | 487 | 110.944 | 31.049 | 55.754 | 1.00       | 98.15 | 1SG3933 |
| ATOM | 3933 | N   | ASP | 488 | 110.189 | 31.763 | 53.759 | 1.00       | 54.53 | 1SG3934 |
| ATOM | 3934 | CA  | ASP | 488 | 110.034 | 33.120 | 54.198 | 1.00       | 54.53 | 1SG3935 |
| ATOM | 3935 | CB  | ASP | 488 | 109.567 | 34.035 | 53.048 | 1.00       | 54.53 | 1SG3936 |
| ATOM | 3936 | CG  | ASP | 488 | 109.473 | 35.473 | 53.539 | 1.00       | 54.53 | 1SG3937 |
| ATOM | 3937 | OD1 | ASP | 488 | 108.618 | 35.741 | 54.424 | 1.00       | 54.53 | 1SG3938 |
| ATOM | 3938 | OD2 | ASP | 488 | 110.255 | 36.324 | 53.035 | 1.00       | 54.53 | 1SG3939 |
| ATOM | 3939 | C   | ASP | 488 | 109.029 | 33.176 | 55.310 | 1.00       | 54.53 | 1SG3940 |
| ATOM | 3940 | O   | ASP | 488 | 109.230 | 33.859 | 56.314 | 1.00       | 54.53 | 1SG3941 |
| ATOM | 3941 | N   | ASP | 489 | 107.923 | 32.431 | 55.162 | 1.00       | 68.93 | 1SG3942 |
| ATOM | 3942 | CA  | ASP | 489 | 106.843 | 32.443 | 56.108 | 1.00       | 68.93 | 1SG3943 |
| ATOM | 3943 | CB  | ASP | 489 | 105.636 | 31.618 | 55.619 | 1.00       | 68.93 | 1SG3944 |
| ATOM | 3944 | CG  | ASP | 489 | 105.030 | 32.333 | 54.414 | 1.00       | 68.93 | 1SG3945 |
| ATOM | 3945 | OD1 | ASP | 489 | 105.456 | 33.484 | 54.129 | 1.00       | 68.93 | 1SG3946 |
| ATOM | 3946 | OD2 | ASP | 489 | 104.131 | 31.737 | 53.762 | 1.00       | 68.93 | 1SG3947 |
| ATOM | 3947 | C   | ASP | 489 | 107.296 | 31.900 | 57.429 | 1.00       | 68.93 | 1SG3948 |
| ATOM | 3948 | O   | ASP | 489 | 106.843 | 32.363 | 58.475 | 1.00       | 68.93 | 1SG3949 |
| ATOM | 3949 | N   | ALA | 490 | 108.167 | 30.872 | 57.420 | 1.00       | 45.48 | 1SG3950 |
| ATOM | 3950 | CA  | ALA | 490 | 108.629 | 30.298 | 58.651 | 1.00       | 45.48 | 1SG3951 |
| ATOM | 3951 | CB  | ALA | 490 | 109.511 | 29.057 | 58.429 | 1.00       | 45.48 | 1SG3952 |
| ATOM | 3952 | C   | ALA | 490 | 109.455 | 31.302 | 59.397 | 1.00       | 45.48 | 1SG3953 |
| ATOM | 3953 | O   | ALA | 490 | 109.283 | 31.476 | 60.602 | 1.00       | 45.48 | 1SG3954 |
| ATOM | 3954 | N   | ARG | 491 | 110.388 | 31.978 | 58.692 | 1.00163.78 |       | 1SG3955 |
| ATOM | 3955 | CA  | ARG | 491 | 111.288 | 32.923 | 59.300 | 1.00163.78 |       | 1SG3956 |
| ATOM | 3956 | CB  | ARG | 491 | 112.376 | 33.390 | 58.313 | 1.00163.78 |       | 1SG3957 |
| ATOM | 3957 | CG  | ARG | 491 | 113.395 | 34.382 | 58.888 | 1.00163.78 |       | 1SG3958 |
| ATOM | 3958 | CD  | ARG | 491 | 113.024 | 35.861 | 58.719 | 1.00163.78 |       | 1SG3959 |
| ATOM | 3959 | NE  | ARG | 491 | 112.525 | 36.354 | 60.035 | 1.00163.78 |       | 1SG3960 |
| ATOM | 3960 | CZ  | ARG | 491 | 112.351 | 37.690 | 60.251 | 1.00163.78 |       | 1SG3961 |
| ATOM | 3961 | NH1 | ARG | 491 | 112.581 | 38.583 | 59.244 | 1.00163.78 |       | 1SG3962 |
| ATOM | 3962 | NH2 | ARG | 491 | 111.955 | 38.137 | 61.480 | 1.00163.78 |       | 1SG3963 |
| ATOM | 3963 | C   | ARG | 491 | 110.575 | 34.156 | 59.783 | 1.00163.78 |       | 1SG3964 |
| ATOM | 3964 | O   | ARG | 491 | 110.752 | 34.580 | 60.924 | 1.00163.78 |       | 1SG3965 |
| ATOM | 3965 | N   | ASP | 492 | 109.751 | 34.748 | 58.897 | 1.00149.56 |       | 1SG3966 |
| ATOM | 3966 | CA  | ASP | 492 | 109.044 | 35.999 | 59.046 | 1.00149.56 |       | 1SG3967 |
| ATOM | 3967 | CB  | ASP | 492 | 108.586 | 36.595 | 57.702 | 1.00149.56 |       | 1SG3968 |
| ATOM | 3968 | CG  | ASP | 492 | 109.813 | 37.172 | 57.010 | 1.00149.56 |       | 1SG3969 |
| ATOM | 3969 | OD1 | ASP | 492 | 110.886 | 37.230 | 57.666 | 1.00149.56 |       | 1SG3970 |
| ATOM | 3970 | OD2 | ASP | 492 | 109.692 | 37.572 | 55.821 | 1.00149.56 |       | 1SG3971 |
| ATOM | 3971 | C   | ASP | 492 | 107.844 | 35.953 | 59.951 | 1.00149.56 |       | 1SG3972 |
| ATOM | 3972 | O   | ASP | 492 | 107.328 | 37.006 | 60.316 | 1.00149.56 |       | 1SG3973 |
| ATOM | 3973 | N   | PHE | 493 | 107.333 | 34.768 | 60.325 | 1.00       | 90.85 | 1SG3974 |
| ATOM | 3974 | CA  | PHE | 493 | 106.052 | 34.707 | 60.983 | 1.00       | 90.85 | 1SG3975 |



## Supplementary material 1.txt

|      |      |     |     |     |         |        |        |      |        |         |
|------|------|-----|-----|-----|---------|--------|--------|------|--------|---------|
| ATOM | 3975 | CB  | PHE | 493 | 105.663 | 33.280 | 61.401 | 1.00 | 90.85  | 1SG3976 |
| ATOM | 3976 | CG  | PHE | 493 | 104.337 | 33.373 | 62.071 | 1.00 | 90.85  | 1SG3977 |
| ATOM | 3977 | CD1 | PHE | 493 | 103.221 | 33.711 | 61.343 | 1.00 | 90.85  | 1SG3978 |
| ATOM | 3978 | CD2 | PHE | 493 | 104.202 | 33.102 | 63.413 | 1.00 | 90.85  | 1SG3979 |
| ATOM | 3979 | CE1 | PHE | 493 | 101.990 | 33.799 | 61.946 | 1.00 | 90.85  | 1SG3980 |
| ATOM | 3980 | CE2 | PHE | 493 | 102.972 | 33.187 | 64.022 | 1.00 | 90.85  | 1SG3981 |
| ATOM | 3981 | CZ  | PHE | 493 | 101.864 | 33.539 | 63.289 | 1.00 | 90.85  | 1SG3982 |
| ATOM | 3982 | C   | PHE | 493 | 105.941 | 35.576 | 62.208 | 1.00 | 90.85  | 1SG3983 |
| ATOM | 3983 | O   | PHE | 493 | 105.013 | 36.377 | 62.303 | 1.00 | 90.85  | 1SG3984 |
| ATOM | 3984 | N   | GLN | 494 | 106.872 | 35.485 | 63.173 | 1.00 | 78.16  | 1SG3985 |
| ATOM | 3985 | CA  | GLN | 494 | 106.688 | 36.223 | 64.395 | 1.00 | 78.16  | 1SG3986 |
| ATOM | 3986 | CB  | GLN | 494 | 107.790 | 35.961 | 65.437 | 1.00 | 78.16  | 1SG3987 |
| ATOM | 3987 | CG  | GLN | 494 | 107.765 | 34.555 | 66.046 | 1.00 | 78.16  | 1SG3988 |
| ATOM | 3988 | CD  | GLN | 494 | 108.608 | 33.618 | 65.190 | 1.00 | 78.16  | 1SG3989 |
| ATOM | 3989 | OE1 | GLN | 494 | 108.528 | 33.612 | 63.962 | 1.00 | 78.16  | 1SG3990 |
| ATOM | 3990 | NE2 | GLN | 494 | 109.457 | 32.797 | 65.863 | 1.00 | 78.16  | 1SG3991 |
| ATOM | 3991 | C   | GLN | 494 | 106.664 | 37.704 | 64.150 | 1.00 | 78.16  | 1SG3992 |
| ATOM | 3992 | O   | GLN | 494 | 105.829 | 38.415 | 64.708 | 1.00 | 78.16  | 1SG3993 |
| ATOM | 3993 | N   | ALA | 495 | 107.577 | 38.216 | 63.307 | 1.00 | 27.89  | 1SG3994 |
| ATOM | 3994 | CA  | ALA | 495 | 107.660 | 39.633 | 63.085 | 1.00 | 27.89  | 1SG3995 |
| ATOM | 3995 | CB  | ALA | 495 | 108.819 | 40.026 | 62.155 | 1.00 | 27.89  | 1SG3996 |
| ATOM | 3996 | C   | ALA | 495 | 106.397 | 40.131 | 62.455 | 1.00 | 27.89  | 1SG3997 |
| ATOM | 3997 | O   | ALA | 495 | 105.878 | 41.183 | 62.822 | 1.00 | 27.89  | 1SG3998 |
| ATOM | 3998 | N   | GLU | 496 | 105.865 | 39.375 | 61.485 | 1.00 | 51.31  | 1SG3999 |
| ATOM | 3999 | CA  | GLU | 496 | 104.694 | 39.762 | 60.756 | 1.00 | 51.31  | 1SG4000 |
| ATOM | 4000 | CB  | GLU | 496 | 104.383 | 38.753 | 59.640 | 1.00 | 51.31  | 1SG4001 |
| ATOM | 4001 | CG  | GLU | 496 | 105.476 | 38.703 | 58.569 | 1.00 | 51.31  | 1SG4002 |
| ATOM | 4002 | CD  | GLU | 496 | 105.267 | 37.460 | 57.714 | 1.00 | 51.31  | 1SG4003 |
| ATOM | 4003 | OE1 | GLU | 496 | 105.031 | 36.370 | 58.301 | 1.00 | 51.31  | 1SG4004 |
| ATOM | 4004 | OE2 | GLU | 496 | 105.349 | 37.582 | 56.462 | 1.00 | 51.31  | 1SG4005 |
| ATOM | 4005 | C   | GLU | 496 | 103.525 | 39.807 | 61.694 | 1.00 | 51.31  | 1SG4006 |
| ATOM | 4006 | O   | GLU | 496 | 102.654 | 40.667 | 61.578 | 1.00 | 51.31  | 1SG4007 |
| ATOM | 4007 | N   | LYS | 497 | 103.478 | 38.870 | 62.656 | 1.00 | 58.77  | 1SG4008 |
| ATOM | 4008 | CA  | LYS | 497 | 102.378 | 38.783 | 63.570 | 1.00 | 58.77  | 1SG4009 |
| ATOM | 4009 | CB  | LYS | 497 | 102.521 | 37.597 | 64.542 | 1.00 | 58.77  | 1SG4010 |
| ATOM | 4010 | CG  | LYS | 497 | 101.327 | 37.405 | 65.479 | 1.00 | 58.77  | 1SG4011 |
| ATOM | 4011 | CD  | LYS | 497 | 101.328 | 36.049 | 66.192 | 1.00 | 58.77  | 1SG4012 |
| ATOM | 4012 | CE  | LYS | 497 | 100.157 | 35.848 | 67.158 | 1.00 | 58.77  | 1SG4013 |
| ATOM | 4013 | NZ  | LYS | 497 | 98.930  | 35.490 | 66.411 | 1.00 | 58.77  | 1SG4014 |
| ATOM | 4014 | C   | LYS | 497 | 102.295 | 40.039 | 64.383 | 1.00 | 58.77  | 1SG4015 |
| ATOM | 4015 | O   | LYS | 497 | 101.201 | 40.543 | 64.631 | 1.00 | 58.77  | 1SG4016 |
| ATOM | 4016 | N   | ASP | 498 | 103.447 | 40.590 | 64.815 | 1.00 | 97.40  | 1SG4017 |
| ATOM | 4017 | CA  | ASP | 498 | 103.409 | 41.760 | 65.650 | 1.00 | 97.40  | 1SG4018 |
| ATOM | 4018 | CB  | ASP | 498 | 104.775 | 42.164 | 66.250 | 1.00 | 97.40  | 1SG4019 |
| ATOM | 4019 | CG  | ASP | 498 | 105.764 | 42.585 | 65.174 | 1.00 | 97.40  | 1SG4020 |
| ATOM | 4020 | OD1 | ASP | 498 | 105.472 | 43.560 | 64.432 | 1.00 | 97.40  | 1SG4021 |
| ATOM | 4021 | OD2 | ASP | 498 | 106.850 | 41.949 | 65.103 | 1.00 | 97.40  | 1SG4022 |
| ATOM | 4022 | C   | ASP | 498 | 102.822 | 42.907 | 64.883 | 1.00 | 97.40  | 1SG4023 |
| ATOM | 4023 | O   | ASP | 498 | 102.130 | 43.750 | 65.453 | 1.00 | 97.40  | 1SG4024 |
| ATOM | 4024 | N   | HIS | 499 | 103.079 | 42.968 | 63.564 | 1.00 | 52.87  | 1SG4025 |
| ATOM | 4025 | CA  | HIS | 499 | 102.538 | 44.010 | 62.739 | 1.00 | 52.87  | 1SG4026 |
| ATOM | 4026 | ND1 | HIS | 499 | 104.290 | 46.126 | 60.806 | 1.00 | 52.87  | 1SG4027 |
| ATOM | 4027 | CG  | HIS | 499 | 104.283 | 44.773 | 61.060 | 1.00 | 52.87  | 1SG4028 |
| ATOM | 4028 | CB  | HIS | 499 | 103.023 | 43.991 | 61.278 | 1.00 | 52.87  | 1SG4029 |
| ATOM | 4029 | NE2 | HIS | 499 | 106.413 | 45.470 | 60.806 | 1.00 | 52.87  | 1SG4030 |
| ATOM | 4030 | CD2 | HIS | 499 | 105.587 | 44.386 | 61.057 | 1.00 | 52.87  | 1SG4031 |
| ATOM | 4031 | CE1 | HIS | 499 | 105.588 | 46.491 | 60.662 | 1.00 | 52.87  | 1SG4032 |
| ATOM | 4032 | C   | HIS | 499 | 101.054 | 43.881 | 62.718 | 1.00 | 52.87  | 1SG4033 |
| ATOM | 4033 | O   | HIS | 499 | 100.342 | 44.873 | 62.574 | 1.00 | 52.87  | 1SG4034 |
| ATOM | 4034 | N   | GLY | 500 | 100.536 | 42.650 | 62.862 | 1.00 | 32.46  | 1SG4035 |
| ATOM | 4035 | CA  | GLY | 500 | 99.116  | 42.502 | 62.822 | 1.00 | 32.46  | 1SG4036 |
| ATOM | 4036 | C   | GLY | 500 | 98.742  | 41.845 | 61.539 | 1.00 | 32.46  | 1SG4037 |
| ATOM | 4037 | O   | GLY | 500 | 97.557  | 41.711 | 61.237 | 1.00 | 32.46  | 1SG4038 |
| ATOM | 4038 | N   | ASP | 501 | 99.729  | 41.425 | 60.725 | 1.00 | 121.30 | 1SG4039 |
| ATOM | 4039 | CA  | ASP | 501 | 99.308  | 40.738 | 59.544 | 1.00 | 121.30 | 1SG4040 |
| ATOM | 4040 | CB  | ASP | 501 | 100.260 | 40.858 | 58.335 | 1.00 | 121.30 | 1SG4041 |
| ATOM | 4041 | CG  | ASP | 501 | 101.649 | 40.364 | 58.689 | 1.00 | 121.30 | 1SG4042 |
| ATOM | 4042 | OD1 | ASP | 501 | 101.902 | 39.141 | 58.537 | 1.00 | 121.30 | 1SG4043 |
| ATOM | 4043 | OD2 | ASP | 501 | 102.481 | 41.211 | 59.110 | 1.00 | 121.30 | 1SG4044 |
| ATOM | 4044 | C   | ASP | 501 | 99.042  | 39.301 | 59.892 | 1.00 | 121.30 | 1SG4045 |
| ATOM | 4045 | O   | ASP | 501 | 99.948  | 38.478 | 60.015 | 1.00 | 121.30 | 1SG4046 |

## Supplementary material 1.txt

|      |      |     |     |     |         |        |        |            |         |
|------|------|-----|-----|-----|---------|--------|--------|------------|---------|
| ATOM | 4046 | N   | LEU | 502 | 97.743  | 39.002 | 60.093 | 1.00121.95 | 1SG4047 |
| ATOM | 4047 | CA  | LEU | 502 | 97.159  | 37.727 | 60.424 | 1.00121.95 | 1SG4048 |
| ATOM | 4048 | CB  | LEU | 502 | 95.665  | 37.785 | 60.806 | 1.00121.95 | 1SG4049 |
| ATOM | 4049 | CG  | LEU | 502 | 95.335  | 38.486 | 62.135 | 1.00121.95 | 1SG4050 |
| ATOM | 4050 | CD2 | LEU | 502 | 93.911  | 38.137 | 62.600 | 1.00121.95 | 1SG4051 |
| ATOM | 4051 | CD1 | LEU | 502 | 95.583  | 39.998 | 62.059 | 1.00121.95 | 1SG4052 |
| ATOM | 4052 | C   | LEU | 502 | 97.219  | 36.798 | 59.249 | 1.00121.95 | 1SG4053 |
| ATOM | 4053 | O   | LEU | 502 | 97.055  | 35.589 | 59.391 | 1.00121.95 | 1SG4054 |
| ATOM | 4054 | N   | SER | 503 | 97.366  | 37.348 | 58.037 | 1.00129.59 | 1SG4055 |
| ATOM | 4055 | CA  | SER | 503 | 97.264  | 36.580 | 56.828 | 1.00129.59 | 1SG4056 |
| ATOM | 4056 | CB  | SER | 503 | 97.143  | 37.469 | 55.578 | 1.00129.59 | 1SG4057 |
| ATOM | 4057 | OG  | SER | 503 | 95.940  | 38.222 | 55.632 | 1.00129.59 | 1SG4058 |
| ATOM | 4058 | C   | SER | 503 | 98.420  | 35.621 | 56.593 | 1.00129.59 | 1SG4059 |
| ATOM | 4059 | O   | SER | 503 | 98.504  | 35.079 | 55.492 | 1.00129.59 | 1SG4060 |
| ATOM | 4060 | N   | CYS | 504 | 99.335  | 35.371 | 57.569 | 1.00105.33 | 1SG4061 |
| ATOM | 4061 | CA  | CYS | 504 | 100.501 | 34.529 | 57.319 | 1.00105.33 | 1SG4062 |
| ATOM | 4062 | CB  | CYS | 504 | 101.774 | 35.029 | 58.010 | 1.00105.33 | 1SG4063 |
| ATOM | 4063 | SG  | CYS | 504 | 102.346 | 36.596 | 57.308 | 1.00105.33 | 1SG4064 |
| ATOM | 4064 | C   | CYS | 504 | 100.329 | 33.081 | 57.769 | 1.00105.33 | 1SG4065 |
| ATOM | 4065 | O   | CYS | 504 | 99.280  | 32.492 | 57.547 | 1.00105.33 | 1SG4066 |
| ATOM | 4066 | N   | ILE | 505 | 101.361 | 32.478 | 58.439 | 1.00132.30 | 1SG4067 |
| ATOM | 4067 | CA  | ILE | 505 | 101.440 | 31.099 | 58.900 | 1.00132.30 | 1SG4068 |
| ATOM | 4068 | CB  | ILE | 505 | 102.609 | 30.835 | 59.805 | 1.00132.30 | 1SG4069 |
| ATOM | 4069 | CG2 | ILE | 505 | 102.404 | 29.469 | 60.472 | 1.00132.30 | 1SG4070 |
| ATOM | 4070 | CG1 | ILE | 505 | 103.933 | 30.952 | 59.038 | 1.00132.30 | 1SG4071 |
| ATOM | 4071 | CD1 | ILE | 505 | 105.154 | 30.772 | 59.937 | 1.00132.30 | 1SG4072 |
| ATOM | 4072 | C   | ILE | 505 | 100.211 | 30.821 | 59.685 | 1.00132.30 | 1SG4073 |
| ATOM | 4073 | O   | ILE | 505 | 99.754  | 29.682 | 59.782 | 1.00132.30 | 1SG4074 |
| ATOM | 4074 | N   | GLU | 506 | 99.655  | 31.877 | 60.281 | 1.00113.02 | 1SG4075 |
| ATOM | 4075 | CA  | GLU | 506 | 98.472  | 31.737 | 61.064 | 1.00113.02 | 1SG4076 |
| ATOM | 4076 | CB  | GLU | 506 | 97.871  | 33.082 | 61.489 | 1.00113.02 | 1SG4077 |
| ATOM | 4077 | CG  | GLU | 506 | 98.723  | 33.881 | 62.468 | 1.00113.02 | 1SG4078 |
| ATOM | 4078 | CD  | GLU | 506 | 97.954  | 35.158 | 62.754 | 1.00113.02 | 1SG4079 |
| ATOM | 4079 | OE1 | GLU | 506 | 96.695  | 35.090 | 62.765 | 1.00113.02 | 1SG4080 |
| ATOM | 4080 | OE2 | GLU | 506 | 98.606  | 36.215 | 62.963 | 1.00113.02 | 1SG4081 |
| ATOM | 4081 | C   | GLU | 506 | 97.413  | 31.062 | 60.237 | 1.00113.02 | 1SG4082 |
| ATOM | 4082 | O   | GLU | 506 | 96.603  | 30.307 | 60.772 | 1.00113.02 | 1SG4083 |
| ATOM | 4083 | N   | CYS | 507 | 97.385  | 31.301 | 58.911 | 1.00 41.77 | 1SG4084 |
| ATOM | 4084 | CA  | CYS | 507 | 96.355  | 30.726 | 58.087 | 1.00 41.77 | 1SG4085 |
| ATOM | 4085 | CB  | CYS | 507 | 96.550  | 31.016 | 56.587 | 1.00 41.77 | 1SG4086 |
| ATOM | 4086 | SG  | CYS | 507 | 96.432  | 32.785 | 56.187 | 1.00 41.77 | 1SG4087 |
| ATOM | 4087 | C   | CYS | 507 | 96.399  | 29.240 | 58.252 | 1.00 41.77 | 1SG4088 |
| ATOM | 4088 | O   | CYS | 507 | 95.363  | 28.585 | 58.363 | 1.00 41.77 | 1SG4089 |
| ATOM | 4089 | N   | TYR | 508 | 97.614  | 28.671 | 58.280 | 1.00 48.49 | 1SG4090 |
| ATOM | 4090 | CA  | TYR | 508 | 97.770  | 27.250 | 58.399 | 1.00 48.49 | 1SG4091 |
| ATOM | 4091 | CB  | TYR | 508 | 99.242  | 26.817 | 58.296 | 1.00 48.49 | 1SG4092 |
| ATOM | 4092 | CG  | TYR | 508 | 99.269  | 25.330 | 58.314 | 1.00 48.49 | 1SG4093 |
| ATOM | 4093 | CD1 | TYR | 508 | 99.018  | 24.625 | 57.160 | 1.00 48.49 | 1SG4094 |
| ATOM | 4094 | CD2 | TYR | 508 | 99.546  | 24.643 | 59.472 | 1.00 48.49 | 1SG4095 |
| ATOM | 4095 | CE1 | TYR | 508 | 99.042  | 23.251 | 57.160 | 1.00 48.49 | 1SG4096 |
| ATOM | 4096 | CE2 | TYR | 508 | 99.571  | 23.269 | 59.478 | 1.00 48.49 | 1SG4097 |
| ATOM | 4097 | CZ  | TYR | 508 | 99.318  | 22.571 | 58.321 | 1.00 48.49 | 1SG4098 |
| ATOM | 4098 | OH  | TYR | 508 | 99.345  | 21.160 | 58.329 | 1.00 48.49 | 1SG4099 |
| ATOM | 4099 | C   | TYR | 508 | 97.249  | 26.788 | 59.729 | 1.00 48.49 | 1SG4100 |
| ATOM | 4100 | O   | TYR | 508 | 96.558  | 25.772 | 59.812 | 1.00 48.49 | 1SG4101 |
| ATOM | 4101 | N   | LEU | 509 | 97.558  | 27.523 | 60.816 | 1.00 93.27 | 1SG4102 |
| ATOM | 4102 | CA  | LEU | 509 | 97.156  | 27.052 | 62.113 | 1.00 93.27 | 1SG4103 |
| ATOM | 4103 | CB  | LEU | 509 | 97.578  | 27.987 | 63.263 | 1.00 93.27 | 1SG4104 |
| ATOM | 4104 | CG  | LEU | 509 | 99.094  | 28.057 | 63.518 | 1.00 93.27 | 1SG4105 |
| ATOM | 4105 | CD2 | LEU | 509 | 99.393  | 28.799 | 64.831 | 1.00 93.27 | 1SG4106 |
| ATOM | 4106 | CD1 | LEU | 509 | 99.847  | 28.649 | 62.319 | 1.00 93.27 | 1SG4107 |
| ATOM | 4107 | C   | LEU | 509 | 95.665  | 26.960 | 62.198 | 1.00 93.27 | 1SG4108 |
| ATOM | 4108 | O   | LEU | 509 | 95.119  | 25.930 | 62.594 | 1.00 93.27 | 1SG4109 |
| ATOM | 4109 | N   | LYS | 510 | 94.969  | 28.041 | 61.809 | 1.00 52.69 | 1SG4110 |
| ATOM | 4110 | CA  | LYS | 510 | 93.543  | 28.097 | 61.937 | 1.00 52.69 | 1SG4111 |
| ATOM | 4111 | CB  | LYS | 510 | 92.993  | 29.497 | 61.616 | 1.00 52.69 | 1SG4112 |
| ATOM | 4112 | CG  | LYS | 510 | 93.501  | 30.558 | 62.597 | 1.00 52.69 | 1SG4113 |
| ATOM | 4113 | CD  | LYS | 510 | 93.292  | 32.000 | 62.132 | 1.00 52.69 | 1SG4114 |
| ATOM | 4114 | CE  | LYS | 510 | 93.811  | 33.036 | 63.131 | 1.00 52.69 | 1SG4115 |
| ATOM | 4115 | NZ  | LYS | 510 | 93.579  | 34.402 | 62.614 | 1.00 52.69 | 1SG4116 |
| ATOM | 4116 | C   | LYS | 510 | 92.893  | 27.104 | 61.023 | 1.00 52.69 | 1SG4117 |

## Supplementary material 1.txt

|      |      |     |     |     |         |        |        |            |       |         |
|------|------|-----|-----|-----|---------|--------|--------|------------|-------|---------|
| ATOM | 4117 | O   | LYS | 510 | 91.918  | 26.454 | 61.398 | 1.00       | 52.69 | 1SG4118 |
| ATOM | 4118 | N   | ASP | 511 | 93.420  | 26.955 | 59.794 | 1.00       | 59.29 | 1SG4119 |
| ATOM | 4119 | CA  | ASP | 511 | 92.793  | 26.102 | 58.824 | 1.00       | 59.29 | 1SG4120 |
| ATOM | 4120 | CB  | ASP | 511 | 93.532  | 26.112 | 57.474 | 1.00       | 59.29 | 1SG4121 |
| ATOM | 4121 | CG  | ASP | 511 | 92.676  | 25.393 | 56.442 | 1.00       | 59.29 | 1SG4122 |
| ATOM | 4122 | OD1 | ASP | 511 | 91.530  | 24.993 | 56.780 | 1.00       | 59.29 | 1SG4123 |
| ATOM | 4123 | OD2 | ASP | 511 | 93.172  | 25.225 | 55.296 | 1.00       | 59.29 | 1SG4124 |
| ATOM | 4124 | C   | ASP | 511 | 92.761  | 24.688 | 59.309 | 1.00       | 59.29 | 1SG4125 |
| ATOM | 4125 | O   | ASP | 511 | 91.702  | 24.063 | 59.322 | 1.00       | 59.29 | 1SG4126 |
| ATOM | 4126 | N   | HIS | 512 | 93.919  | 24.141 | 59.732 | 1.00164.34 |       | 1SG4127 |
| ATOM | 4127 | CA  | HIS | 512 | 93.931  | 22.788 | 60.210 | 1.00164.34 |       | 1SG4128 |
| ATOM | 4128 | ND1 | HIS | 512 | 93.862  | 20.853 | 57.420 | 1.00164.34 |       | 1SG4129 |
| ATOM | 4129 | CG  | HIS | 512 | 94.694  | 21.785 | 57.999 | 1.00164.34 |       | 1SG4130 |
| ATOM | 4130 | CB  | HIS | 512 | 94.944  | 21.895 | 59.474 | 1.00164.34 |       | 1SG4131 |
| ATOM | 4131 | NE2 | HIS | 512 | 94.698  | 22.075 | 55.761 | 1.00164.34 |       | 1SG4132 |
| ATOM | 4132 | CD2 | HIS | 512 | 95.196  | 22.523 | 56.971 | 1.00164.34 |       | 1SG4133 |
| ATOM | 4133 | CE1 | HIS | 512 | 93.901  | 21.071 | 56.082 | 1.00164.34 |       | 1SG4134 |
| ATOM | 4134 | C   | HIS | 512 | 94.417  | 22.875 | 61.607 | 1.00164.34 |       | 1SG4135 |
| ATOM | 4135 | O   | HIS | 512 | 95.566  | 22.531 | 61.871 | 1.00164.34 |       | 1SG4136 |
| ATOM | 4136 | N   | PRO | 513 | 93.509  | 23.212 | 62.488 | 1.00190.29 |       | 1SG4137 |
| ATOM | 4137 | CA  | PRO | 513 | 93.796  | 23.599 | 63.847 | 1.00190.29 |       | 1SG4138 |
| ATOM | 4138 | CD  | PRO | 513 | 92.129  | 22.788 | 62.322 | 1.00190.29 |       | 1SG4139 |
| ATOM | 4139 | CB  | PRO | 513 | 92.493  | 23.431 | 64.629 | 1.00190.29 |       | 1SG4140 |
| ATOM | 4140 | CG  | PRO | 513 | 91.400  | 23.362 | 63.547 | 1.00190.29 |       | 1SG4141 |
| ATOM | 4141 | C   | PRO | 513 | 94.925  | 22.867 | 64.483 | 1.00190.29 |       | 1SG4142 |
| ATOM | 4142 | O   | PRO | 513 | 94.793  | 21.686 | 64.800 | 1.00190.29 |       | 1SG4143 |
| ATOM | 4143 | N   | GLU | 514 | 96.048  | 23.585 | 64.676 | 1.00126.61 |       | 1SG4144 |
| ATOM | 4144 | CA  | GLU | 514 | 97.200  | 23.014 | 65.294 | 1.00126.61 |       | 1SG4145 |
| ATOM | 4145 | CB  | GLU | 514 | 98.063  | 22.130 | 64.384 | 1.00126.61 |       | 1SG4146 |
| ATOM | 4146 | CG  | GLU | 514 | 99.092  | 21.305 | 65.166 | 1.00126.61 |       | 1SG4147 |
| ATOM | 4147 | CD  | GLU | 514 | 98.356  | 20.139 | 65.816 | 1.00126.61 |       | 1SG4148 |
| ATOM | 4148 | OE1 | GLU | 514 | 97.597  | 19.446 | 65.087 | 1.00126.61 |       | 1SG4149 |
| ATOM | 4149 | OE2 | GLU | 514 | 98.534  | 19.930 | 67.046 | 1.00126.61 |       | 1SG4150 |
| ATOM | 4150 | C   | GLU | 514 | 98.053  | 24.145 | 65.752 | 1.00126.61 |       | 1SG4151 |
| ATOM | 4151 | O   | GLU | 514 | 97.779  | 25.307 | 65.453 | 1.00126.61 |       | 1SG4152 |
| ATOM | 4152 | N   | SER | 515 | 99.114  | 23.816 | 66.511 | 1.00       | 75.12 | 1SG4153 |
| ATOM | 4153 | CA  | SER | 515 | 99.991  | 24.813 | 67.039 | 1.00       | 75.12 | 1SG4154 |
| ATOM | 4154 | CB  | SER | 515 | 100.960 | 24.274 | 68.104 | 1.00       | 75.12 | 1SG4155 |
| ATOM | 4155 | OG  | SER | 515 | 100.231 | 23.780 | 69.216 | 1.00       | 75.12 | 1SG4156 |
| ATOM | 4156 | C   | SER | 515 | 100.820 | 25.348 | 65.924 | 1.00       | 75.12 | 1SG4157 |
| ATOM | 4157 | O   | SER | 515 | 100.884 | 24.775 | 64.837 | 1.00       | 75.12 | 1SG4158 |
| ATOM | 4158 | N   | THR | 516 | 101.459 | 26.504 | 66.174 | 1.00       | 37.75 | 1SG4159 |
| ATOM | 4159 | CA  | THR | 516 | 102.286 | 27.097 | 65.175 | 1.00       | 37.75 | 1SG4160 |
| ATOM | 4160 | CB  | THR | 516 | 102.893 | 28.394 | 65.627 | 1.00       | 37.75 | 1SG4161 |
| ATOM | 4161 | OG1 | THR | 516 | 101.875 | 29.315 | 65.989 | 1.00       | 37.75 | 1SG4162 |
| ATOM | 4162 | CG2 | THR | 516 | 103.739 | 28.969 | 64.480 | 1.00       | 37.75 | 1SG4163 |
| ATOM | 4163 | C   | THR | 516 | 103.406 | 26.148 | 64.926 | 1.00       | 37.75 | 1SG4164 |
| ATOM | 4164 | O   | THR | 516 | 103.760 | 25.862 | 63.784 | 1.00       | 37.75 | 1SG4165 |
| ATOM | 4165 | N   | VAL | 517 | 103.979 | 25.607 | 66.013 | 1.00       | 50.35 | 1SG4166 |
| ATOM | 4166 | CA  | VAL | 517 | 105.135 | 24.781 | 65.871 | 1.00       | 50.35 | 1SG4167 |
| ATOM | 4167 | CB  | VAL | 517 | 105.650 | 24.310 | 67.198 | 1.00       | 50.35 | 1SG4168 |
| ATOM | 4168 | CG1 | VAL | 517 | 106.835 | 23.360 | 66.961 | 1.00       | 50.35 | 1SG4169 |
| ATOM | 4169 | CG2 | VAL | 517 | 105.985 | 25.543 | 68.054 | 1.00       | 50.35 | 1SG4170 |
| ATOM | 4170 | C   | VAL | 517 | 104.862 | 23.555 | 65.059 | 1.00       | 50.35 | 1SG4171 |
| ATOM | 4171 | O   | VAL | 517 | 105.442 | 23.379 | 63.989 | 1.00       | 50.35 | 1SG4172 |
| ATOM | 4172 | N   | GLU | 518 | 103.956 | 22.674 | 65.528 | 1.00       | 96.78 | 1SG4173 |
| ATOM | 4173 | CA  | GLU | 518 | 103.867 | 21.422 | 64.832 | 1.00       | 96.78 | 1SG4174 |
| ATOM | 4174 | CB  | GLU | 518 | 102.981 | 20.387 | 65.549 | 1.00       | 96.78 | 1SG4175 |
| ATOM | 4175 | CG  | GLU | 518 | 103.510 | 19.887 | 66.894 | 1.00       | 96.78 | 1SG4176 |
| ATOM | 4176 | CD  | GLU | 518 | 102.495 | 18.881 | 67.424 | 1.00       | 96.78 | 1SG4177 |
| ATOM | 4177 | OE1 | GLU | 518 | 102.268 | 17.853 | 66.731 | 1.00       | 96.78 | 1SG4178 |
| ATOM | 4178 | OE2 | GLU | 518 | 101.928 | 19.127 | 68.523 | 1.00       | 96.78 | 1SG4179 |
| ATOM | 4179 | C   | GLU | 518 | 103.288 | 21.535 | 63.469 | 1.00       | 96.78 | 1SG4180 |
| ATOM | 4180 | O   | GLU | 518 | 103.978 | 21.398 | 62.462 | 1.00       | 96.78 | 1SG4181 |
| ATOM | 4181 | N   | ASP | 519 | 101.986 | 21.840 | 63.395 | 1.00       | 48.57 | 1SG4182 |
| ATOM | 4182 | CA  | ASP | 519 | 101.412 | 21.808 | 62.093 | 1.00       | 48.57 | 1SG4183 |
| ATOM | 4183 | CB  | ASP | 519 | 99.875  | 21.832 | 62.076 | 1.00       | 48.57 | 1SG4184 |
| ATOM | 4184 | CG  | ASP | 519 | 99.389  | 20.418 | 62.374 | 1.00       | 48.57 | 1SG4185 |
| ATOM | 4185 | OD1 | ASP | 519 | 100.259 | 19.522 | 62.545 | 1.00       | 48.57 | 1SG4186 |
| ATOM | 4186 | OD2 | ASP | 519 | 98.147  | 20.211 | 62.424 | 1.00       | 48.57 | 1SG4187 |
| ATOM | 4187 | C   | ASP | 519 | 101.904 | 22.949 | 61.295 | 1.00       | 48.57 | 1SG4188 |

## Supplementary material 1.txt

|      |      |     |     |     |         |        |        |      |       |         |
|------|------|-----|-----|-----|---------|--------|--------|------|-------|---------|
| ATOM | 4188 | O   | ASP | 519 | 102.267 | 22.784 | 60.133 | 1.00 | 48.57 | 1SG4189 |
| ATOM | 4189 | N   | ALA | 520 | 101.947 | 24.146 | 61.899 | 1.00 | 77.58 | 1SG4190 |
| ATOM | 4190 | CA  | ALA | 520 | 102.227 | 25.234 | 61.027 | 1.00 | 77.58 | 1SG4191 |
| ATOM | 4191 | CB  | ALA | 520 | 102.105 | 26.600 | 61.725 | 1.00 | 77.58 | 1SG4192 |
| ATOM | 4192 | C   | ALA | 520 | 103.603 | 25.152 | 60.441 | 1.00 | 77.58 | 1SG4193 |
| ATOM | 4193 | O   | ALA | 520 | 103.741 | 24.979 | 59.233 | 1.00 | 77.58 | 1SG4194 |
| ATOM | 4194 | N   | LEU | 521 | 104.656 | 25.192 | 61.281 | 1.00 | 95.08 | 1SG4195 |
| ATOM | 4195 | CA  | LEU | 521 | 105.991 | 25.215 | 60.744 | 1.00 | 95.08 | 1SG4196 |
| ATOM | 4196 | CB  | LEU | 521 | 107.060 | 25.652 | 61.764 | 1.00 | 95.08 | 1SG4197 |
| ATOM | 4197 | CG  | LEU | 521 | 107.006 | 27.152 | 62.114 | 1.00 | 95.08 | 1SG4198 |
| ATOM | 4198 | CD2 | LEU | 521 | 105.688 | 27.535 | 62.800 | 1.00 | 95.08 | 1SG4199 |
| ATOM | 4199 | CD1 | LEU | 521 | 107.321 | 28.017 | 60.883 | 1.00 | 95.08 | 1SG4200 |
| ATOM | 4200 | C   | LEU | 521 | 106.400 | 23.890 | 60.190 | 1.00 | 95.08 | 1SG4201 |
| ATOM | 4201 | O   | LEU | 521 | 106.942 | 23.814 | 59.088 | 1.00 | 95.08 | 1SG4202 |
| ATOM | 4202 | N   | ASN | 522 | 106.134 | 22.802 | 60.937 | 1.00 | 33.02 | 1SG4203 |
| ATOM | 4203 | CA  | ASN | 522 | 106.622 | 21.515 | 60.535 | 1.00 | 33.02 | 1SG4204 |
| ATOM | 4204 | CB  | ASN | 522 | 106.364 | 20.403 | 61.566 | 1.00 | 33.02 | 1SG4205 |
| ATOM | 4205 | CG  | ASN | 522 | 107.239 | 20.690 | 62.778 | 1.00 | 33.02 | 1SG4206 |
| ATOM | 4206 | OD1 | ASN | 522 | 108.103 | 21.565 | 62.735 | 1.00 | 33.02 | 1SG4207 |
| ATOM | 4207 | ND2 | ASN | 522 | 107.024 | 19.929 | 63.884 | 1.00 | 33.02 | 1SG4208 |
| ATOM | 4208 | C   | ASN | 522 | 105.985 | 21.113 | 59.251 | 1.00 | 33.02 | 1SG4209 |
| ATOM | 4209 | O   | ASN | 522 | 106.647 | 20.555 | 58.377 | 1.00 | 33.02 | 1SG4210 |
| ATOM | 4210 | N   | HIS | 523 | 104.678 | 21.383 | 59.096 | 1.00 | 61.89 | 1SG4211 |
| ATOM | 4211 | CA  | HIS | 523 | 104.026 | 20.977 | 57.888 | 1.00 | 61.89 | 1SG4212 |
| ATOM | 4212 | ND1 | HIS | 523 | 101.322 | 19.200 | 56.974 | 1.00 | 61.89 | 1SG4213 |
| ATOM | 4213 | CG  | HIS | 523 | 101.783 | 20.487 | 56.813 | 1.00 | 61.89 | 1SG4214 |
| ATOM | 4214 | CB  | HIS | 523 | 102.512 | 21.246 | 57.881 | 1.00 | 61.89 | 1SG4215 |
| ATOM | 4215 | NE2 | HIS | 523 | 100.761 | 19.820 | 54.915 | 1.00 | 61.89 | 1SG4216 |
| ATOM | 4216 | CD2 | HIS | 523 | 101.433 | 20.851 | 55.549 | 1.00 | 61.89 | 1SG4217 |
| ATOM | 4217 | CE1 | HIS | 523 | 100.719 | 18.850 | 55.811 | 1.00 | 61.89 | 1SG4218 |
| ATOM | 4218 | C   | HIS | 523 | 104.643 | 21.742 | 56.763 | 1.00 | 61.89 | 1SG4219 |
| ATOM | 4219 | O   | HIS | 523 | 104.906 | 21.191 | 55.698 | 1.00 | 61.89 | 1SG4220 |
| ATOM | 4220 | N   | VAL | 524 | 104.925 | 23.038 | 56.994 | 1.00 | 38.04 | 1SG4221 |
| ATOM | 4221 | CA  | VAL | 524 | 105.483 | 23.904 | 55.995 | 1.00 | 38.04 | 1SG4222 |
| ATOM | 4222 | CB  | VAL | 524 | 105.725 | 25.285 | 56.527 | 1.00 | 38.04 | 1SG4223 |
| ATOM | 4223 | CG1 | VAL | 524 | 106.600 | 26.049 | 55.529 | 1.00 | 38.04 | 1SG4224 |
| ATOM | 4224 | CG2 | VAL | 524 | 104.363 | 25.960 | 56.756 | 1.00 | 38.04 | 1SG4225 |
| ATOM | 4225 | C   | VAL | 524 | 106.796 | 23.353 | 55.538 | 1.00 | 38.04 | 1SG4226 |
| ATOM | 4226 | O   | VAL | 524 | 107.104 | 23.374 | 54.346 | 1.00 | 38.04 | 1SG4227 |
| ATOM | 4227 | N   | ASN | 525 | 107.605 | 22.839 | 56.479 | 1.00 | 37.24 | 1SG4228 |
| ATOM | 4228 | CA  | ASN | 525 | 108.887 | 22.310 | 56.119 | 1.00 | 37.24 | 1SG4229 |
| ATOM | 4229 | CB  | ASN | 525 | 109.683 | 21.784 | 57.326 | 1.00 | 37.24 | 1SG4230 |
| ATOM | 4230 | CG  | ASN | 525 | 110.119 | 22.980 | 58.159 | 1.00 | 37.24 | 1SG4231 |
| ATOM | 4231 | OD1 | ASN | 525 | 110.736 | 22.823 | 59.211 | 1.00 | 37.24 | 1SG4232 |
| ATOM | 4232 | ND2 | ASN | 525 | 109.789 | 24.210 | 57.680 | 1.00 | 37.24 | 1SG4233 |
| ATOM | 4233 | C   | ASN | 525 | 108.674 | 21.160 | 55.189 | 1.00 | 37.24 | 1SG4234 |
| ATOM | 4234 | O   | ASN | 525 | 109.413 | 20.986 | 54.221 | 1.00 | 37.24 | 1SG4235 |
| ATOM | 4235 | N   | GLY | 526 | 107.636 | 20.349 | 55.457 | 1.00 | 19.06 | 1SG4236 |
| ATOM | 4236 | CA  | GLY | 526 | 107.378 | 19.186 | 54.662 | 1.00 | 19.06 | 1SG4237 |
| ATOM | 4237 | C   | GLY | 526 | 107.110 | 19.608 | 53.255 | 1.00 | 19.06 | 1SG4238 |
| ATOM | 4238 | O   | GLY | 526 | 107.533 | 18.938 | 52.315 | 1.00 | 19.06 | 1SG4239 |
| ATOM | 4239 | N   | LEU | 527 | 106.381 | 20.725 | 53.066 | 1.00 | 89.15 | 1SG4240 |
| ATOM | 4240 | CA  | LEU | 527 | 106.071 | 21.163 | 51.735 | 1.00 | 89.15 | 1SG4241 |
| ATOM | 4241 | CB  | LEU | 527 | 105.079 | 22.334 | 51.653 | 1.00 | 89.15 | 1SG4242 |
| ATOM | 4242 | CG  | LEU | 527 | 103.615 | 21.965 | 51.963 | 1.00 | 89.15 | 1SG4243 |
| ATOM | 4243 | CD2 | LEU | 527 | 102.673 | 23.138 | 51.644 | 1.00 | 89.15 | 1SG4244 |
| ATOM | 4244 | CD1 | LEU | 527 | 103.446 | 21.446 | 53.396 | 1.00 | 89.15 | 1SG4245 |
| ATOM | 4245 | C   | LEU | 527 | 107.330 | 21.545 | 51.021 | 1.00 | 89.15 | 1SG4246 |
| ATOM | 4246 | O   | LEU | 527 | 107.442 | 21.348 | 49.814 | 1.00 | 89.15 | 1SG4247 |
| ATOM | 4247 | N   | LEU | 528 | 108.309 | 22.126 | 51.738 | 1.00 | 37.01 | 1SG4248 |
| ATOM | 4248 | CA  | LEU | 528 | 109.548 | 22.514 | 51.125 | 1.00 | 37.01 | 1SG4249 |
| ATOM | 4249 | CB  | LEU | 528 | 110.509 | 23.182 | 52.122 | 1.00 | 37.01 | 1SG4250 |
| ATOM | 4250 | CG  | LEU | 528 | 109.975 | 24.498 | 52.714 | 1.00 | 37.01 | 1SG4251 |
| ATOM | 4251 | CD2 | LEU | 528 | 109.559 | 25.475 | 51.605 | 1.00 | 37.01 | 1SG4252 |
| ATOM | 4252 | CD1 | LEU | 528 | 110.982 | 25.113 | 53.699 | 1.00 | 37.01 | 1SG4253 |
| ATOM | 4253 | C   | LEU | 528 | 110.245 | 21.285 | 50.629 | 1.00 | 37.01 | 1SG4254 |
| ATOM | 4254 | O   | LEU | 528 | 110.800 | 21.276 | 49.531 | 1.00 | 37.01 | 1SG4255 |
| ATOM | 4255 | N   | GLY | 529 | 110.238 | 20.209 | 51.440 | 1.00 | 18.48 | 1SG4256 |
| ATOM | 4256 | CA  | GLY | 529 | 110.920 | 18.998 | 51.082 | 1.00 | 18.48 | 1SG4257 |
| ATOM | 4257 | C   | GLY | 529 | 110.298 | 18.428 | 49.848 | 1.00 | 18.48 | 1SG4258 |
| ATOM | 4258 | O   | GLY | 529 | 110.997 | 17.962 | 48.950 | 1.00 | 18.48 | 1SG4259 |

## Supplementary material 1.txt

|      |      |     |     |     |         |        |        |      |        |         |
|------|------|-----|-----|-----|---------|--------|--------|------|--------|---------|
| ATOM | 4259 | N   | ASN | 530 | 108.956 | 18.452 | 49.776 | 1.00 | 26.26  | 1SG4260 |
| ATOM | 4260 | CA  | ASN | 530 | 108.247 | 17.905 | 48.657 | 1.00 | 26.26  | 1SG4261 |
| ATOM | 4261 | CB  | ASN | 530 | 106.722 | 18.054 | 48.802 | 1.00 | 26.26  | 1SG4262 |
| ATOM | 4262 | CG  | ASN | 530 | 106.280 | 17.228 | 50.000 | 1.00 | 26.26  | 1SG4263 |
| ATOM | 4263 | OD1 | ASN | 530 | 106.700 | 16.084 | 50.168 | 1.00 | 26.26  | 1SG4264 |
| ATOM | 4264 | ND2 | ASN | 530 | 105.416 | 17.822 | 50.866 | 1.00 | 26.26  | 1SG4265 |
| ATOM | 4265 | C   | ASN | 530 | 108.642 | 18.679 | 47.443 | 1.00 | 26.26  | 1SG4266 |
| ATOM | 4266 | O   | ASN | 530 | 108.861 | 18.114 | 46.373 | 1.00 | 26.26  | 1SG4267 |
| ATOM | 4267 | N   | CYS | 531 | 108.759 | 20.009 | 47.598 | 1.00 | 32.10  | 1SG4268 |
| ATOM | 4268 | CA  | CYS | 531 | 109.079 | 20.884 | 46.509 | 1.00 | 32.10  | 1SG4269 |
| ATOM | 4269 | CB  | CYS | 531 | 109.147 | 22.359 | 46.925 | 1.00 | 32.10  | 1SG4270 |
| ATOM | 4270 | SG  | CYS | 531 | 107.533 | 22.982 | 47.462 | 1.00 | 32.10  | 1SG4271 |
| ATOM | 4271 | C   | CYS | 531 | 110.426 | 20.531 | 45.977 | 1.00 | 32.10  | 1SG4272 |
| ATOM | 4272 | O   | CYS | 531 | 110.650 | 20.563 | 44.768 | 1.00 | 32.10  | 1SG4273 |
| ATOM | 4273 | N   | LEU | 532 | 111.366 | 20.200 | 46.876 | 1.00 | 39.46  | 1SG4274 |
| ATOM | 4274 | CA  | LEU | 532 | 112.701 | 19.877 | 46.463 | 1.00 | 39.46  | 1SG4275 |
| ATOM | 4275 | CB  | LEU | 532 | 113.643 | 19.595 | 47.646 | 1.00 | 39.46  | 1SG4276 |
| ATOM | 4276 | CG  | LEU | 532 | 113.877 | 20.815 | 48.555 | 1.00 | 39.46  | 1SG4277 |
| ATOM | 4277 | CD2 | LEU | 532 | 114.272 | 22.058 | 47.740 | 1.00 | 39.46  | 1SG4278 |
| ATOM | 4278 | CD1 | LEU | 532 | 114.883 | 20.493 | 49.672 | 1.00 | 39.46  | 1SG4279 |
| ATOM | 4279 | C   | LEU | 532 | 112.678 | 18.640 | 45.617 | 1.00 | 39.46  | 1SG4280 |
| ATOM | 4280 | O   | LEU | 532 | 113.374 | 18.560 | 44.606 | 1.00 | 39.46  | 1SG4281 |
| ATOM | 4281 | N   | LEU | 533 | 111.882 | 17.627 | 46.011 | 1.00 | 86.47  | 1SG4282 |
| ATOM | 4282 | CA  | LEU | 533 | 111.833 | 16.418 | 45.242 | 1.00 | 86.47  | 1SG4283 |
| ATOM | 4283 | CB  | LEU | 533 | 110.987 | 15.300 | 45.880 | 1.00 | 86.47  | 1SG4284 |
| ATOM | 4284 | CG  | LEU | 533 | 111.680 | 14.577 | 47.051 | 1.00 | 86.47  | 1SG4285 |
| ATOM | 4285 | CD2 | LEU | 533 | 110.850 | 13.375 | 47.528 | 1.00 | 86.47  | 1SG4286 |
| ATOM | 4286 | CD1 | LEU | 533 | 112.032 | 15.540 | 48.192 | 1.00 | 86.47  | 1SG4287 |
| ATOM | 4287 | C   | LEU | 533 | 111.256 | 16.719 | 43.897 | 1.00 | 86.47  | 1SG4288 |
| ATOM | 4288 | O   | LEU | 533 | 111.678 | 16.137 | 42.899 | 1.00 | 86.47  | 1SG4289 |
| ATOM | 4289 | N   | GLU | 534 | 110.255 | 17.619 | 43.842 | 1.00 | 80.47  | 1SG4290 |
| ATOM | 4290 | CA  | GLU | 534 | 109.618 | 17.946 | 42.600 | 1.00 | 80.47  | 1SG4291 |
| ATOM | 4291 | CB  | GLU | 534 | 108.367 | 18.815 | 42.761 | 1.00 | 80.47  | 1SG4292 |
| ATOM | 4292 | CG  | GLU | 534 | 107.235 | 18.109 | 43.510 | 1.00 | 80.47  | 1SG4293 |
| ATOM | 4293 | CD  | GLU | 534 | 106.875 | 16.842 | 42.745 | 1.00 | 80.47  | 1SG4294 |
| ATOM | 4294 | OE1 | GLU | 534 | 106.533 | 16.952 | 41.538 | 1.00 | 80.47  | 1SG4295 |
| ATOM | 4295 | OE2 | GLU | 534 | 106.936 | 15.745 | 43.362 | 1.00 | 80.47  | 1SG4296 |
| ATOM | 4296 | C   | GLU | 534 | 110.576 | 18.656 | 41.693 | 1.00 | 80.47  | 1SG4297 |
| ATOM | 4297 | O   | GLU | 534 | 110.540 | 18.463 | 40.479 | 1.00 | 80.47  | 1SG4298 |
| ATOM | 4298 | N   | MET | 535 | 111.441 | 19.525 | 42.248 | 1.00 | 77.13  | 1SG4299 |
| ATOM | 4299 | CA  | MET | 535 | 112.392 | 20.221 | 41.429 | 1.00 | 77.13  | 1SG4300 |
| ATOM | 4300 | CB  | MET | 535 | 113.205 | 21.271 | 42.205 | 1.00 | 77.13  | 1SG4301 |
| ATOM | 4301 | CG  | MET | 535 | 112.366 | 22.483 | 42.617 | 1.00 | 77.13  | 1SG4302 |
| ATOM | 4302 | SD  | MET | 535 | 113.269 | 23.760 | 43.542 | 1.00 | 77.13  | 1SG4303 |
| ATOM | 4303 | CE  | MET | 535 | 113.182 | 22.870 | 45.122 | 1.00 | 77.13  | 1SG4304 |
| ATOM | 4304 | C   | MET | 535 | 113.337 | 19.219 | 40.844 | 1.00 | 77.13  | 1SG4305 |
| ATOM | 4305 | O   | MET | 535 | 113.709 | 19.303 | 39.674 | 1.00 | 77.13  | 1SG4306 |
| ATOM | 4306 | N   | ASN | 536 | 113.734 | 18.219 | 41.648 | 1.00 | 45.07  | 1SG4307 |
| ATOM | 4307 | CA  | ASN | 536 | 114.665 | 17.222 | 41.204 | 1.00 | 45.07  | 1SG4308 |
| ATOM | 4308 | CB  | ASN | 536 | 115.038 | 16.213 | 42.303 | 1.00 | 45.07  | 1SG4309 |
| ATOM | 4309 | CG  | ASN | 536 | 115.989 | 16.905 | 43.273 | 1.00 | 45.07  | 1SG4310 |
| ATOM | 4310 | OD1 | ASN | 536 | 116.823 | 17.712 | 42.869 | 1.00 | 45.07  | 1SG4311 |
| ATOM | 4311 | ND2 | ASN | 536 | 115.869 | 16.576 | 44.588 | 1.00 | 45.07  | 1SG4312 |
| ATOM | 4312 | C   | ASN | 536 | 114.068 | 16.460 | 40.055 | 1.00 | 45.07  | 1SG4313 |
| ATOM | 4313 | O   | ASN | 536 | 114.775 | 16.098 | 39.118 | 1.00 | 45.07  | 1SG4314 |
| ATOM | 4314 | N   | TRP | 537 | 112.751 | 16.180 | 40.110 | 1.00 | 106.73 | 1SG4315 |
| ATOM | 4315 | CA  | TRP | 537 | 112.067 | 15.441 | 39.084 | 1.00 | 106.73 | 1SG4316 |
| ATOM | 4316 | CB  | TRP | 537 | 110.602 | 15.127 | 39.429 | 1.00 | 106.73 | 1SG4317 |
| ATOM | 4317 | CG  | TRP | 537 | 109.899 | 14.374 | 38.326 | 1.00 | 106.73 | 1SG4318 |
| ATOM | 4318 | CD2 | TRP | 537 | 109.272 | 15.012 | 37.204 | 1.00 | 106.73 | 1SG4319 |
| ATOM | 4319 | CD1 | TRP | 537 | 109.741 | 13.031 | 38.146 | 1.00 | 106.73 | 1SG4320 |
| ATOM | 4320 | NE1 | TRP | 537 | 109.060 | 12.792 | 36.976 | 1.00 | 106.73 | 1SG4321 |
| ATOM | 4321 | CE2 | TRP | 537 | 108.765 | 14.003 | 36.385 | 1.00 | 106.73 | 1SG4322 |
| ATOM | 4322 | CE3 | TRP | 537 | 109.136 | 16.331 | 36.878 | 1.00 | 106.73 | 1SG4323 |
| ATOM | 4323 | CZ2 | TRP | 537 | 108.110 | 14.299 | 35.224 | 1.00 | 106.73 | 1SG4324 |
| ATOM | 4324 | CZ3 | TRP | 537 | 108.471 | 16.628 | 35.709 | 1.00 | 106.73 | 1SG4325 |
| ATOM | 4325 | CH2 | TRP | 537 | 107.969 | 15.631 | 34.899 | 1.00 | 106.73 | 1SG4326 |
| ATOM | 4326 | C   | TRP | 537 | 112.036 | 16.211 | 37.801 | 1.00 | 106.73 | 1SG4327 |
| ATOM | 4327 | O   | TRP | 537 | 112.169 | 15.639 | 36.720 | 1.00 | 106.73 | 1SG4328 |
| ATOM | 4328 | N   | LYS | 538 | 111.838 | 17.537 | 37.882 | 1.00 | 120.34 | 1SG4329 |
| ATOM | 4329 | CA  | LYS | 538 | 111.680 | 18.320 | 36.692 | 1.00 | 120.34 | 1SG4330 |

## Supplementary material 1.txt

|      |      |     |     |     |         |        |        |            |         |
|------|------|-----|-----|-----|---------|--------|--------|------------|---------|
| ATOM | 4330 | CB  | LYS | 538 | 111.277 | 19.776 | 36.956 | 1.00120.34 | 1SG4331 |
| ATOM | 4331 | CG  | LYS | 538 | 110.724 | 20.425 | 35.690 | 1.00120.34 | 1SG4332 |
| ATOM | 4332 | CD  | LYS | 538 | 109.455 | 19.743 | 35.173 | 1.00120.34 | 1SG4333 |
| ATOM | 4333 | CE  | LYS | 538 | 108.996 | 20.247 | 33.804 | 1.00120.34 | 1SG4334 |
| ATOM | 4334 | NZ  | LYS | 538 | 107.961 | 19.341 | 33.261 | 1.00120.34 | 1SG4335 |
| ATOM | 4335 | C   | LYS | 538 | 112.935 | 18.298 | 35.876 | 1.00120.34 | 1SG4336 |
| ATOM | 4336 | O   | LYS | 538 | 112.888 | 18.392 | 34.652 | 1.00120.34 | 1SG4337 |
| ATOM | 4337 | N   | PHE | 539 | 114.100 | 18.208 | 36.534 | 1.00109.41 | 1SG4338 |
| ATOM | 4338 | CA  | PHE | 539 | 115.361 | 18.169 | 35.849 | 1.00109.41 | 1SG4339 |
| ATOM | 4339 | CB  | PHE | 539 | 116.577 | 18.205 | 36.789 | 1.00109.41 | 1SG4340 |
| ATOM | 4340 | CG  | PHE | 539 | 116.753 | 19.590 | 37.308 | 1.00109.41 | 1SG4341 |
| ATOM | 4341 | CD1 | PHE | 539 | 117.421 | 20.528 | 36.555 | 1.00109.41 | 1SG4342 |
| ATOM | 4342 | CD2 | PHE | 539 | 116.269 | 19.952 | 38.544 | 1.00109.41 | 1SG4343 |
| ATOM | 4343 | CE1 | PHE | 539 | 117.597 | 21.808 | 37.020 | 1.00109.41 | 1SG4344 |
| ATOM | 4344 | CE2 | PHE | 539 | 116.443 | 21.232 | 39.015 | 1.00109.41 | 1SG4345 |
| ATOM | 4345 | CZ  | PHE | 539 | 117.108 | 22.163 | 38.253 | 1.00109.41 | 1SG4346 |
| ATOM | 4346 | C   | PHE | 539 | 115.473 | 16.905 | 35.050 | 1.00109.41 | 1SG4347 |
| ATOM | 4347 | O   | PHE | 539 | 116.078 | 16.888 | 33.981 | 1.00109.41 | 1SG4348 |
| ATOM | 4348 | N   | LEU | 540 | 114.909 | 15.796 | 35.552 | 1.0076.41  | 1SG4349 |
| ATOM | 4349 | CA  | LEU | 540 | 115.131 | 14.535 | 34.915 | 1.0076.41  | 1SG4350 |
| ATOM | 4350 | CB  | LEU | 540 | 114.492 | 13.355 | 35.669 | 1.0076.41  | 1SG4351 |
| ATOM | 4351 | CG  | LEU | 540 | 115.105 | 13.106 | 37.060 | 1.0076.41  | 1SG4352 |
| ATOM | 4352 | CD2 | LEU | 540 | 116.630 | 12.948 | 36.972 | 1.0076.41  | 1SG4353 |
| ATOM | 4353 | CD1 | LEU | 540 | 114.431 | 11.919 | 37.767 | 1.0076.41  | 1SG4354 |
| ATOM | 4354 | C   | LEU | 540 | 114.622 | 14.510 | 33.517 | 1.0076.41  | 1SG4355 |
| ATOM | 4355 | O   | LEU | 540 | 113.456 | 14.798 | 33.245 | 1.0076.41  | 1SG4356 |
| ATOM | 4356 | N   | LYS | 541 | 115.542 | 14.202 | 32.581 | 1.00131.13 | 1SG4357 |
| ATOM | 4357 | CA  | LYS | 541 | 115.174 | 13.972 | 31.225 | 1.00131.13 | 1SG4358 |
| ATOM | 4358 | CB  | LYS | 541 | 116.384 | 13.679 | 30.320 | 1.00131.13 | 1SG4359 |
| ATOM | 4359 | CG  | LYS | 541 | 117.450 | 14.775 | 30.265 | 1.00131.13 | 1SG4360 |
| ATOM | 4360 | CD  | LYS | 541 | 118.750 | 14.295 | 29.615 | 1.00131.13 | 1SG4361 |
| ATOM | 4361 | CE  | LYS | 541 | 119.819 | 15.380 | 29.479 | 1.00131.13 | 1SG4362 |
| ATOM | 4362 | NZ  | LYS | 541 | 121.015 | 14.822 | 28.808 | 1.00131.13 | 1SG4363 |
| ATOM | 4363 | C   | LYS | 541 | 114.419 | 12.693 | 31.268 | 1.00131.13 | 1SG4364 |
| ATOM | 4364 | O   | LYS | 541 | 113.276 | 12.621 | 30.830 | 1.00131.13 | 1SG4365 |
| ATOM | 4365 | N   | LYS | 542 | 115.038 | 11.654 | 31.875 | 1.00257.18 | 1SG4366 |
| ATOM | 4366 | CA  | LYS | 542 | 114.454 | 10.342 | 31.896 | 1.00257.18 | 1SG4367 |
| ATOM | 4367 | CB  | LYS | 542 | 113.241 | 10.227 | 32.843 | 1.00257.18 | 1SG4368 |
| ATOM | 4368 | CG  | LYS | 542 | 112.707 | 8.803  | 33.038 | 1.00257.18 | 1SG4369 |
| ATOM | 4369 | CD  | LYS | 542 | 113.718 | 7.837  | 33.660 | 1.00257.18 | 1SG4370 |
| ATOM | 4370 | CE  | LYS | 542 | 114.538 | 7.062  | 32.623 | 1.00257.18 | 1SG4371 |
| ATOM | 4371 | NZ  | LYS | 542 | 115.497 | 6.165  | 33.305 | 1.00257.18 | 1SG4372 |
| ATOM | 4372 | C   | LYS | 542 | 114.065 | 10.026 | 30.486 | 1.00257.18 | 1SG4373 |
| ATOM | 4373 | O   | LYS | 542 | 114.609 | 10.595 | 29.539 | 1.00257.18 | 1SG4374 |
| ATOM | 4374 | N   | GLN | 543 | 113.157 | 9.065  | 30.272 | 1.00264.08 | 1SG4375 |
| ATOM | 4375 | CA  | GLN | 543 | 112.751 | 8.917  | 28.914 | 1.00264.08 | 1SG4376 |
| ATOM | 4376 | CB  | GLN | 543 | 111.777 | 7.749  | 28.676 | 1.00264.08 | 1SG4377 |
| ATOM | 4377 | CG  | GLN | 543 | 111.349 | 7.585  | 27.216 | 1.00264.08 | 1SG4378 |
| ATOM | 4378 | CD  | GLN | 543 | 110.422 | 6.379  | 27.134 | 1.00264.08 | 1SG4379 |
| ATOM | 4379 | OE1 | GLN | 543 | 110.169 | 5.710  | 28.134 | 1.00264.08 | 1SG4380 |
| ATOM | 4380 | NE2 | GLN | 543 | 109.908 | 6.089  | 25.909 | 1.00264.08 | 1SG4381 |
| ATOM | 4381 | C   | GLN | 543 | 112.036 | 10.193 | 28.632 | 1.00264.08 | 1SG4382 |
| ATOM | 4382 | O   | GLN | 543 | 111.423 | 10.755 | 29.539 | 1.00264.08 | 1SG4383 |
| ATOM | 4383 | N   | ASP | 544 | 112.089 | 10.676 | 27.374 | 1.00259.35 | 1SG4384 |
| ATOM | 4384 | CA  | ASP | 544 | 111.468 | 11.927 | 27.047 | 1.00259.35 | 1SG4385 |
| ATOM | 4385 | CB  | ASP | 544 | 109.930 | 11.854 | 27.042 | 1.00259.35 | 1SG4386 |
| ATOM | 4386 | CG  | ASP | 544 | 109.380 | 13.174 | 26.517 | 1.00259.35 | 1SG4387 |
| ATOM | 4387 | OD1 | ASP | 544 | 110.197 | 14.065 | 26.161 | 1.00259.35 | 1SG4388 |
| ATOM | 4388 | OD2 | ASP | 544 | 108.128 | 13.308 | 26.468 | 1.00259.35 | 1SG4389 |
| ATOM | 4389 | C   | ASP | 544 | 111.888 | 12.981 | 28.030 | 1.00259.35 | 1SG4390 |
| ATOM | 4390 | O   | ASP | 544 | 111.126 | 13.343 | 28.925 | 1.00259.35 | 1SG4391 |
| ATOM | 4391 | N   | SER | 545 | 113.137 | 13.478 | 27.886 | 1.00115.06 | 1SG4392 |
| ATOM | 4392 | CA  | SER | 545 | 113.687 | 14.501 | 28.727 | 1.00115.06 | 1SG4393 |
| ATOM | 4393 | CB  | SER | 545 | 114.969 | 15.132 | 28.158 | 1.00115.06 | 1SG4394 |
| ATOM | 4394 | OG  | SER | 545 | 115.410 | 16.185 | 29.002 | 1.00115.06 | 1SG4395 |
| ATOM | 4395 | C   | SER | 545 | 112.685 | 15.595 | 28.883 | 1.00115.06 | 1SG4396 |
| ATOM | 4396 | O   | SER | 545 | 111.738 | 15.717 | 28.110 | 1.00115.06 | 1SG4397 |
| ATOM | 4397 | N   | VAL | 546 | 112.872 | 16.418 | 29.929 | 1.00143.98 | 1SG4398 |
| ATOM | 4398 | CA  | VAL | 546 | 111.917 | 17.428 | 30.262 | 1.00143.98 | 1SG4399 |
| ATOM | 4399 | CB  | VAL | 546 | 112.111 | 18.020 | 31.619 | 1.00143.98 | 1SG4400 |
| ATOM | 4400 | CG1 | VAL | 546 | 111.808 | 16.905 | 32.632 | 1.00143.98 | 1SG4401 |

## Supplementary material 1.txt

|      |      |     |     |     |         |        |        |            |         |
|------|------|-----|-----|-----|---------|--------|--------|------------|---------|
| ATOM | 4401 | CG2 | VAL | 546 | 113.532 | 18.599 | 31.720 | 1.00143.98 | 1SG4402 |
| ATOM | 4402 | C   | VAL | 546 | 111.896 | 18.516 | 29.248 | 1.00143.98 | 1SG4403 |
| ATOM | 4403 | O   | VAL | 546 | 112.875 | 18.825 | 28.570 | 1.00143.98 | 1SG4404 |
| ATOM | 4404 | N   | PRO | 547 | 110.715 | 19.059 | 29.133 | 1.00171.70 | 1SG4405 |
| ATOM | 4405 | CA  | PRO | 547 | 110.407 | 20.122 | 28.227 | 1.00171.70 | 1SG4406 |
| ATOM | 4406 | CD  | PRO | 547 | 109.550 | 18.576 | 29.851 | 1.00171.70 | 1SG4407 |
| ATOM | 4407 | CB  | PRO | 547 | 108.889 | 20.307 | 28.293 | 1.00171.70 | 1SG4408 |
| ATOM | 4408 | CG  | PRO | 547 | 108.495 | 19.674 | 29.641 | 1.00171.70 | 1SG4409 |
| ATOM | 4409 | C   | PRO | 547 | 111.170 | 21.336 | 28.611 | 1.00171.70 | 1SG4410 |
| ATOM | 4410 | O   | PRO | 547 | 111.243 | 21.639 | 29.800 | 1.00171.70 | 1SG4411 |
| ATOM | 4411 | N   | LEU | 548 | 111.720 | 22.047 | 27.611 | 1.00160.40 | 1SG4412 |
| ATOM | 4412 | CA  | LEU | 548 | 112.490 | 23.232 | 27.827 | 1.00160.40 | 1SG4413 |
| ATOM | 4413 | CB  | LEU | 548 | 111.986 | 24.138 | 28.967 | 1.00160.40 | 1SG4414 |
| ATOM | 4414 | CG  | LEU | 548 | 110.635 | 24.812 | 28.654 | 1.00160.40 | 1SG4415 |
| ATOM | 4415 | CD2 | LEU | 548 | 110.287 | 25.879 | 29.703 | 1.00160.40 | 1SG4416 |
| ATOM | 4416 | CD1 | LEU | 548 | 109.517 | 23.776 | 28.459 | 1.00160.40 | 1SG4417 |
| ATOM | 4417 | C   | LEU | 548 | 113.901 | 22.834 | 28.090 | 1.00160.40 | 1SG4418 |
| ATOM | 4418 | O   | LEU | 548 | 114.171 | 21.814 | 28.723 | 1.00160.40 | 1SG4419 |
| ATOM | 4419 | N   | SER | 549 | 114.844 | 23.649 | 27.581 | 1.00 38.99 | 1SG4420 |
| ATOM | 4420 | CA  | SER | 549 | 116.232 | 23.343 | 27.735 | 1.00 38.99 | 1SG4421 |
| ATOM | 4421 | CB  | SER | 549 | 117.165 | 24.278 | 26.946 | 1.00 38.99 | 1SG4422 |
| ATOM | 4422 | OG  | SER | 549 | 116.955 | 24.111 | 25.551 | 1.00 38.99 | 1SG4423 |
| ATOM | 4423 | C   | SER | 549 | 116.563 | 23.474 | 29.181 | 1.00 38.99 | 1SG4424 |
| ATOM | 4424 | O   | SER | 549 | 115.869 | 24.151 | 29.938 | 1.00 38.99 | 1SG4425 |
| ATOM | 4425 | N   | CYS | 550 | 117.652 | 22.803 | 29.590 | 1.00 42.14 | 1SG4426 |
| ATOM | 4426 | CA  | CYS | 550 | 118.077 | 22.784 | 30.955 | 1.00 42.14 | 1SG4427 |
| ATOM | 4427 | CB  | CYS | 550 | 119.287 | 21.868 | 31.193 | 1.00 42.14 | 1SG4428 |
| ATOM | 4428 | SG  | CYS | 550 | 119.786 | 21.824 | 32.938 | 1.00 42.14 | 1SG4429 |
| ATOM | 4429 | C   | CYS | 550 | 118.467 | 24.174 | 31.329 | 1.00 42.14 | 1SG4430 |
| ATOM | 4430 | O   | CYS | 550 | 118.318 | 24.583 | 32.478 | 1.00 42.14 | 1SG4431 |
| ATOM | 4431 | N   | LYS | 551 | 118.956 | 24.945 | 30.344 | 1.00 86.04 | 1SG4432 |
| ATOM | 4432 | CA  | LYS | 551 | 119.442 | 26.270 | 30.584 | 1.00 86.04 | 1SG4433 |
| ATOM | 4433 | CB  | LYS | 551 | 119.846 | 26.954 | 29.270 | 1.00 86.04 | 1SG4434 |
| ATOM | 4434 | CG  | LYS | 551 | 120.724 | 28.193 | 29.430 | 1.00 86.04 | 1SG4435 |
| ATOM | 4435 | CD  | LYS | 551 | 121.406 | 28.582 | 28.117 | 1.00 86.04 | 1SG4436 |
| ATOM | 4436 | CE  | LYS | 551 | 122.295 | 27.468 | 27.557 | 1.00 86.04 | 1SG4437 |
| ATOM | 4437 | NZ  | LYS | 551 | 122.701 | 27.784 | 26.170 | 1.00 86.04 | 1SG4438 |
| ATOM | 4438 | C   | LYS | 551 | 118.338 | 27.064 | 31.215 | 1.00 86.04 | 1SG4439 |
| ATOM | 4439 | O   | LYS | 551 | 118.576 | 27.866 | 32.117 | 1.00 86.04 | 1SG4440 |
| ATOM | 4440 | N   | LYS | 552 | 117.100 | 26.873 | 30.730 | 1.00128.18 | 1SG4441 |
| ATOM | 4441 | CA  | LYS | 552 | 115.928 | 27.534 | 31.237 | 1.00128.18 | 1SG4442 |
| ATOM | 4442 | CB  | LYS | 552 | 114.714 | 27.395 | 30.306 | 1.00128.18 | 1SG4443 |
| ATOM | 4443 | CG  | LYS | 552 | 114.818 | 28.305 | 29.083 | 1.00128.18 | 1SG4444 |
| ATOM | 4444 | CD  | LYS | 552 | 115.977 | 27.953 | 28.149 | 1.00128.18 | 1SG4445 |
| ATOM | 4445 | CE  | LYS | 552 | 116.139 | 28.944 | 26.996 | 1.00128.18 | 1SG4446 |
| ATOM | 4446 | NZ  | LYS | 552 | 116.497 | 30.277 | 27.531 | 1.00128.18 | 1SG4447 |
| ATOM | 4447 | C   | LYS | 552 | 115.558 | 27.016 | 32.601 | 1.00128.18 | 1SG4448 |
| ATOM | 4448 | O   | LYS | 552 | 114.924 | 27.713 | 33.389 | 1.00128.18 | 1SG4449 |
| ATOM | 4449 | N   | TYR | 553 | 115.924 | 25.757 | 32.894 | 1.00104.75 | 1SG4450 |
| ATOM | 4450 | CA  | TYR | 553 | 115.626 | 25.040 | 34.108 | 1.00104.75 | 1SG4451 |
| ATOM | 4451 | CB  | TYR | 553 | 115.957 | 23.538 | 34.054 | 1.00104.75 | 1SG4452 |
| ATOM | 4452 | CG  | TYR | 553 | 114.745 | 22.848 | 33.530 | 1.00104.75 | 1SG4453 |
| ATOM | 4453 | CD1 | TYR | 553 | 113.721 | 22.587 | 34.407 | 1.00104.75 | 1SG4454 |
| ATOM | 4454 | CD2 | TYR | 553 | 114.609 | 22.461 | 32.215 | 1.00104.75 | 1SG4455 |
| ATOM | 4455 | CE1 | TYR | 553 | 112.579 | 21.954 | 33.991 | 1.00104.75 | 1SG4456 |
| ATOM | 4456 | CE2 | TYR | 553 | 113.462 | 21.823 | 31.792 | 1.00104.75 | 1SG4457 |
| ATOM | 4457 | CZ  | TYR | 553 | 112.444 | 21.569 | 32.683 | 1.00104.75 | 1SG4458 |
| ATOM | 4458 | OH  | TYR | 553 | 111.262 | 20.917 | 32.274 | 1.00104.75 | 1SG4459 |
| ATOM | 4459 | C   | TYR | 553 | 116.260 | 25.608 | 35.333 | 1.00104.75 | 1SG4460 |
| ATOM | 4460 | O   | TYR | 553 | 115.803 | 25.328 | 36.437 | 1.00104.75 | 1SG4461 |
| ATOM | 4461 | N   | SER | 554 | 117.350 | 26.372 | 35.185 | 1.00114.08 | 1SG4462 |
| ATOM | 4462 | CA  | SER | 554 | 118.150 | 26.852 | 36.279 | 1.00114.08 | 1SG4463 |
| ATOM | 4463 | CB  | SER | 554 | 119.351 | 27.685 | 35.798 | 1.00114.08 | 1SG4464 |
| ATOM | 4464 | OG  | SER | 554 | 120.233 | 26.869 | 35.043 | 1.00114.08 | 1SG4465 |
| ATOM | 4465 | C   | SER | 554 | 117.380 | 27.707 | 37.297 | 1.00114.08 | 1SG4466 |
| ATOM | 4466 | O   | SER | 554 | 118.022 | 28.303 | 38.159 | 1.00114.08 | 1SG4467 |
| ATOM | 4467 | N   | PHE | 555 | 116.012 | 27.766 | 37.279 | 1.00192.56 | 1SG4468 |
| ATOM | 4468 | CA  | PHE | 555 | 115.147 | 28.405 | 38.251 | 1.00192.56 | 1SG4469 |
| ATOM | 4469 | CB  | PHE | 555 | 113.659 | 28.371 | 37.923 | 1.00192.56 | 1SG4470 |
| ATOM | 4470 | CG  | PHE | 555 | 113.216 | 29.534 | 38.723 | 1.00192.56 | 1SG4471 |
| ATOM | 4471 | CD1 | PHE | 555 | 113.439 | 30.811 | 38.270 | 1.00192.56 | 1SG4472 |

## Supplementary material 1.txt

|      |      |     |     |     |         |        |        |            |         |
|------|------|-----|-----|-----|---------|--------|--------|------------|---------|
| ATOM | 4472 | CD2 | PHE | 555 | 112.631 | 29.361 | 39.942 | 1.00192.56 | 1SG4473 |
| ATOM | 4473 | CE1 | PHE | 555 | 113.037 | 31.897 | 39.007 | 1.00192.56 | 1SG4474 |
| ATOM | 4474 | CE2 | PHE | 555 | 112.224 | 30.438 | 40.686 | 1.00192.56 | 1SG4475 |
| ATOM | 4475 | CZ  | PHE | 555 | 112.429 | 31.711 | 40.220 | 1.00192.56 | 1SG4476 |
| ATOM | 4476 | C   | PHE | 555 | 115.423 | 27.725 | 39.565 | 1.00192.56 | 1SG4477 |
| ATOM | 4477 | O   | PHE | 555 | 115.009 | 28.174 | 40.634 | 1.00192.56 | 1SG4478 |
| ATOM | 4478 | N   | HIS | 556 | 116.085 | 26.556 | 39.488 | 1.00 62.87 | 1SG4479 |
| ATOM | 4479 | CA  | HIS | 556 | 116.555 | 25.836 | 40.629 | 1.00 62.87 | 1SG4480 |
| ATOM | 4480 | ND1 | HIS | 556 | 116.719 | 22.649 | 41.703 | 1.00 62.87 | 1SG4481 |
| ATOM | 4481 | CG  | HIS | 556 | 117.598 | 23.658 | 41.382 | 1.00 62.87 | 1SG4482 |
| ATOM | 4482 | CB  | HIS | 556 | 117.389 | 24.606 | 40.241 | 1.00 62.87 | 1SG4483 |
| ATOM | 4483 | NE2 | HIS | 556 | 118.384 | 22.530 | 43.171 | 1.00 62.87 | 1SG4484 |
| ATOM | 4484 | CD2 | HIS | 556 | 118.608 | 23.573 | 42.288 | 1.00 62.87 | 1SG4485 |
| ATOM | 4485 | CE1 | HIS | 556 | 117.237 | 22.006 | 42.779 | 1.00 62.87 | 1SG4486 |
| ATOM | 4486 | C   | HIS | 556 | 117.443 | 26.769 | 41.400 | 1.00 62.87 | 1SG4487 |
| ATOM | 4487 | O   | HIS | 556 | 117.467 | 26.740 | 42.629 | 1.00 62.87 | 1SG4488 |
| ATOM | 4488 | N   | VAL | 557 | 118.195 | 27.633 | 40.691 | 1.00 63.77 | 1SG4489 |
| ATOM | 4489 | CA  | VAL | 557 | 119.066 | 28.591 | 41.308 | 1.00 63.77 | 1SG4490 |
| ATOM | 4490 | CB  | VAL | 557 | 119.619 | 29.556 | 40.330 | 1.00 63.77 | 1SG4491 |
| ATOM | 4491 | CG1 | VAL | 557 | 120.130 | 30.722 | 41.173 | 1.00 63.77 | 1SG4492 |
| ATOM | 4492 | CG2 | VAL | 557 | 120.681 | 28.868 | 39.456 | 1.00 63.77 | 1SG4493 |
| ATOM | 4493 | C   | VAL | 557 | 118.296 | 29.458 | 42.249 | 1.00 63.77 | 1SG4494 |
| ATOM | 4494 | O   | VAL | 557 | 118.756 | 29.738 | 43.354 | 1.00 63.77 | 1SG4495 |
| ATOM | 4495 | N   | LEU | 558 | 117.106 | 29.926 | 41.833 | 1.00100.28 | 1SG4496 |
| ATOM | 4496 | CA  | LEU | 558 | 116.376 | 30.811 | 42.692 | 1.00100.28 | 1SG4497 |
| ATOM | 4497 | CB  | LEU | 558 | 115.146 | 31.488 | 42.059 | 1.00100.28 | 1SG4498 |
| ATOM | 4498 | CG  | LEU | 558 | 115.554 | 32.507 | 40.972 | 1.00100.28 | 1SG4499 |
| ATOM | 4499 | CD2 | LEU | 558 | 114.546 | 33.656 | 40.833 | 1.00100.28 | 1SG4500 |
| ATOM | 4500 | CD1 | LEU | 558 | 115.916 | 31.813 | 39.650 | 1.00100.28 | 1SG4501 |
| ATOM | 4501 | C   | LEU | 558 | 116.005 | 30.087 | 43.947 | 1.00100.28 | 1SG4502 |
| ATOM | 4502 | O   | LEU | 558 | 115.953 | 30.689 | 45.017 | 1.00100.28 | 1SG4503 |
| ATOM | 4503 | N   | ALA | 559 | 115.716 | 28.777 | 43.849 | 1.00 33.48 | 1SG4504 |
| ATOM | 4504 | CA  | ALA | 559 | 115.397 | 27.999 | 45.013 | 1.00 33.48 | 1SG4505 |
| ATOM | 4505 | CB  | ALA | 559 | 115.021 | 26.546 | 44.678 | 1.00 33.48 | 1SG4506 |
| ATOM | 4506 | C   | ALA | 559 | 116.600 | 27.956 | 45.910 | 1.00 33.48 | 1SG4507 |
| ATOM | 4507 | O   | ALA | 559 | 116.478 | 28.009 | 47.132 | 1.00 33.48 | 1SG4508 |
| ATOM | 4508 | N   | ARG | 560 | 117.805 | 27.838 | 45.321 | 1.00 53.84 | 1SG4509 |
| ATOM | 4509 | CA  | ARG | 560 | 119.023 | 27.733 | 46.078 | 1.00 53.84 | 1SG4510 |
| ATOM | 4510 | CB  | ARG | 560 | 120.253 | 27.498 | 45.185 | 1.00 53.84 | 1SG4511 |
| ATOM | 4511 | CG  | ARG | 560 | 120.195 | 26.170 | 44.429 | 1.00 53.84 | 1SG4512 |
| ATOM | 4512 | CD  | ARG | 560 | 121.466 | 25.851 | 43.641 | 1.00 53.84 | 1SG4513 |
| ATOM | 4513 | NE  | ARG | 560 | 121.261 | 24.529 | 42.986 | 1.00 53.84 | 1SG4514 |
| ATOM | 4514 | CZ  | ARG | 560 | 122.330 | 23.798 | 42.558 | 1.00 53.84 | 1SG4515 |
| ATOM | 4515 | NH1 | ARG | 560 | 123.597 | 24.266 | 42.749 | 1.00 53.84 | 1SG4516 |
| ATOM | 4516 | NH2 | ARG | 560 | 122.131 | 22.598 | 41.938 | 1.00 53.84 | 1SG4517 |
| ATOM | 4517 | C   | ARG | 560 | 119.272 | 28.992 | 46.853 | 1.00 53.84 | 1SG4518 |
| ATOM | 4518 | O   | ARG | 560 | 119.708 | 28.945 | 48.002 | 1.00 53.84 | 1SG4519 |
| ATOM | 4519 | N   | SER | 561 | 119.002 | 30.155 | 46.235 | 1.00 75.82 | 1SG4520 |
| ATOM | 4520 | CA  | SER | 561 | 119.279 | 31.430 | 46.837 | 1.00 75.82 | 1SG4521 |
| ATOM | 4521 | CB  | SER | 561 | 118.935 | 32.596 | 45.896 | 1.00 75.82 | 1SG4522 |
| ATOM | 4522 | OG  | SER | 561 | 119.226 | 33.837 | 46.522 | 1.00 75.82 | 1SG4523 |
| ATOM | 4523 | C   | SER | 561 | 118.487 | 31.611 | 48.100 | 1.00 75.82 | 1SG4524 |
| ATOM | 4524 | O   | SER | 561 | 119.001 | 32.139 | 49.085 | 1.00 75.82 | 1SG4525 |
| ATOM | 4525 | N   | ILE | 562 | 117.209 | 31.189 | 48.108 | 1.00120.19 | 1SG4526 |
| ATOM | 4526 | CA  | ILE | 562 | 116.374 | 31.369 | 49.265 | 1.00120.19 | 1SG4527 |
| ATOM | 4527 | CB  | ILE | 562 | 114.933 | 30.980 | 49.026 | 1.00120.19 | 1SG4528 |
| ATOM | 4528 | CG2 | ILE | 562 | 114.847 | 29.467 | 48.782 | 1.00120.19 | 1SG4529 |
| ATOM | 4529 | CG1 | ILE | 562 | 114.040 | 31.468 | 50.176 | 1.00120.19 | 1SG4530 |
| ATOM | 4530 | CD1 | ILE | 562 | 113.826 | 32.978 | 50.183 | 1.00120.19 | 1SG4531 |
| ATOM | 4531 | C   | ILE | 562 | 116.908 | 30.557 | 50.406 | 1.00120.19 | 1SG4532 |
| ATOM | 4532 | O   | ILE | 562 | 116.989 | 31.040 | 51.535 | 1.00120.19 | 1SG4533 |
| ATOM | 4533 | N   | GLN | 563 | 117.317 | 29.303 | 50.133 | 1.00 72.51 | 1SG4534 |
| ATOM | 4534 | CA  | GLN | 563 | 117.774 | 28.418 | 51.165 | 1.00 72.51 | 1SG4535 |
| ATOM | 4535 | CB  | GLN | 563 | 118.210 | 27.053 | 50.604 | 1.00 72.51 | 1SG4536 |
| ATOM | 4536 | CG  | GLN | 563 | 117.067 | 26.227 | 50.011 | 1.00 72.51 | 1SG4537 |
| ATOM | 4537 | CD  | GLN | 563 | 116.368 | 25.509 | 51.156 | 1.00 72.51 | 1SG4538 |
| ATOM | 4538 | OE1 | GLN | 563 | 116.948 | 24.638 | 51.802 | 1.00 72.51 | 1SG4539 |
| ATOM | 4539 | NE2 | GLN | 563 | 115.086 | 25.880 | 51.417 | 1.00 72.51 | 1SG4540 |
| ATOM | 4540 | C   | GLN | 563 | 118.980 | 29.010 | 51.824 | 1.00 72.51 | 1SG4541 |
| ATOM | 4541 | O   | GLN | 563 | 119.087 | 29.012 | 53.050 | 1.00 72.51 | 1SG4542 |
| ATOM | 4542 | N   | PHE | 564 | 119.922 | 29.535 | 51.021 | 1.00 53.81 | 1SG4543 |



## Supplementary material 1.txt

|      |      |     |     |     |         |        |        |            |       |         |
|------|------|-----|-----|-----|---------|--------|--------|------------|-------|---------|
| ATOM | 4543 | CA  | PHE | 564 | 121.143 | 30.067 | 51.555 | 1.00       | 53.81 | 1SG4544 |
| ATOM | 4544 | CB  | PHE | 564 | 122.165 | 30.452 | 50.472 | 1.00       | 53.81 | 1SG4545 |
| ATOM | 4545 | CG  | PHE | 564 | 123.455 | 30.671 | 51.185 | 1.00       | 53.81 | 1SG4546 |
| ATOM | 4546 | CD1 | PHE | 564 | 124.323 | 29.619 | 51.368 | 1.00       | 53.81 | 1SG4547 |
| ATOM | 4547 | CD2 | PHE | 564 | 123.788 | 31.909 | 51.685 | 1.00       | 53.81 | 1SG4548 |
| ATOM | 4548 | CE1 | PHE | 564 | 125.515 | 29.798 | 52.027 | 1.00       | 53.81 | 1SG4549 |
| ATOM | 4549 | CE2 | PHE | 564 | 124.980 | 32.092 | 52.347 | 1.00       | 53.81 | 1SG4550 |
| ATOM | 4550 | CZ  | PHE | 564 | 125.847 | 31.039 | 52.516 | 1.00       | 53.81 | 1SG4551 |
| ATOM | 4551 | C   | PHE | 564 | 120.853 | 31.305 | 52.348 | 1.00       | 53.81 | 1SG4552 |
| ATOM | 4552 | O   | PHE | 564 | 121.457 | 31.553 | 53.390 | 1.00       | 53.81 | 1SG4553 |
| ATOM | 4553 | N   | MET | 565 | 119.920 | 32.125 | 51.837 | 1.00163.64 |       | 1SG4554 |
| ATOM | 4554 | CA  | MET | 565 | 119.585 | 33.408 | 52.381 | 1.00163.64 |       | 1SG4555 |
| ATOM | 4555 | CB  | MET | 565 | 118.544 | 34.139 | 51.510 | 1.00163.64 |       | 1SG4556 |
| ATOM | 4556 | CG  | MET | 565 | 118.567 | 35.663 | 51.645 | 1.00163.64 |       | 1SG4557 |
| ATOM | 4557 | SD  | MET | 565 | 119.823 | 36.498 | 50.620 | 1.00163.64 |       | 1SG4558 |
| ATOM | 4558 | CE  | MET | 565 | 121.238 | 35.449 | 51.063 | 1.00163.64 |       | 1SG4559 |
| ATOM | 4559 | C   | MET | 565 | 118.986 | 33.294 | 53.756 | 1.00163.64 |       | 1SG4560 |
| ATOM | 4560 | O   | MET | 565 | 119.285 | 34.112 | 54.625 | 1.00163.64 |       | 1SG4561 |
| ATOM | 4561 | N   | TYR | 566 | 118.127 | 32.285 | 54.021 | 1.00209.40 |       | 1SG4562 |
| ATOM | 4562 | CA  | TYR | 566 | 117.446 | 32.351 | 55.287 | 1.00209.40 |       | 1SG4563 |
| ATOM | 4563 | CB  | TYR | 566 | 115.931 | 32.113 | 55.173 | 1.00209.40 |       | 1SG4564 |
| ATOM | 4564 | CG  | TYR | 566 | 115.311 | 33.277 | 54.480 | 1.00209.40 |       | 1SG4565 |
| ATOM | 4565 | CD1 | TYR | 566 | 115.420 | 33.433 | 53.117 | 1.00209.40 |       | 1SG4566 |
| ATOM | 4566 | CD2 | TYR | 566 | 114.601 | 34.210 | 55.201 | 1.00209.40 |       | 1SG4567 |
| ATOM | 4567 | CE1 | TYR | 566 | 114.837 | 34.509 | 52.488 | 1.00209.40 |       | 1SG4568 |
| ATOM | 4568 | CE2 | TYR | 566 | 114.016 | 35.286 | 54.577 | 1.00209.40 |       | 1SG4569 |
| ATOM | 4569 | CZ  | TYR | 566 | 114.134 | 35.438 | 53.217 | 1.00209.40 |       | 1SG4570 |
| ATOM | 4570 | OH  | TYR | 566 | 113.533 | 36.542 | 52.575 | 1.00209.40 |       | 1SG4571 |
| ATOM | 4571 | C   | TYR | 566 | 117.945 | 31.362 | 56.296 | 1.00209.40 |       | 1SG4572 |
| ATOM | 4572 | O   | TYR | 566 | 117.487 | 30.219 | 56.328 | 1.00209.40 |       | 1SG4573 |
| ATOM | 4573 | N   | ASN | 567 | 118.870 | 31.802 | 57.183 | 1.00237.75 |       | 1SG4574 |
| ATOM | 4574 | CA  | ASN | 567 | 119.239 | 30.985 | 58.303 | 1.00237.75 |       | 1SG4575 |
| ATOM | 4575 | CB  | ASN | 567 | 120.669 | 31.248 | 58.831 | 1.00237.75 |       | 1SG4576 |
| ATOM | 4576 | CG  | ASN | 567 | 120.857 | 32.688 | 59.310 | 1.00237.75 |       | 1SG4577 |
| ATOM | 4577 | OD1 | ASN | 567 | 121.828 | 32.971 | 60.010 | 1.00237.75 |       | 1SG4578 |
| ATOM | 4578 | ND2 | ASN | 567 | 119.929 | 33.613 | 58.946 | 1.00237.75 |       | 1SG4579 |
| ATOM | 4579 | C   | ASN | 567 | 118.220 | 31.348 | 59.337 | 1.00237.75 |       | 1SG4580 |
| ATOM | 4580 | O   | ASN | 567 | 118.516 | 31.825 | 60.432 | 1.00237.75 |       | 1SG4581 |
| ATOM | 4581 | N   | GLN | 568 | 116.954 | 31.086 | 58.973 | 1.00131.74 |       | 1SG4582 |
| ATOM | 4582 | CA  | GLN | 568 | 115.794 | 31.398 | 59.749 | 1.00131.74 |       | 1SG4583 |
| ATOM | 4583 | CB  | GLN | 568 | 115.759 | 30.724 | 61.131 | 1.00131.74 |       | 1SG4584 |
| ATOM | 4584 | CG  | GLN | 568 | 115.581 | 29.206 | 61.063 | 1.00131.74 |       | 1SG4585 |
| ATOM | 4585 | CD  | GLN | 568 | 115.341 | 28.696 | 62.477 | 1.00131.74 |       | 1SG4586 |
| ATOM | 4586 | OE1 | GLN | 568 | 116.120 | 28.953 | 63.393 | 1.00131.74 |       | 1SG4587 |
| ATOM | 4587 | NE2 | GLN | 568 | 114.215 | 27.956 | 62.665 | 1.00131.74 |       | 1SG4588 |
| ATOM | 4588 | C   | GLN | 568 | 115.696 | 32.877 | 59.947 | 1.00131.74 |       | 1SG4589 |
| ATOM | 4589 | O   | GLN | 568 | 115.002 | 33.333 | 60.855 | 1.00131.74 |       | 1SG4590 |
| ATOM | 4590 | N   | GLY | 569 | 116.336 | 33.675 | 59.068 | 1.00       | 32.43 | 1SG4591 |
| ATOM | 4591 | CA  | GLY | 569 | 116.250 | 35.100 | 59.222 | 1.00       | 32.43 | 1SG4592 |
| ATOM | 4592 | C   | GLY | 569 | 116.254 | 35.714 | 57.859 | 1.00       | 32.43 | 1SG4593 |
| ATOM | 4593 | O   | GLY | 569 | 116.890 | 35.204 | 56.938 | 1.00       | 32.43 | 1SG4594 |
| ATOM | 4594 | N   | ASP | 570 | 115.543 | 36.850 | 57.704 | 1.00       | 58.07 | 1SG4595 |
| ATOM | 4595 | CA  | ASP | 570 | 115.471 | 37.496 | 56.424 | 1.00       | 58.07 | 1SG4596 |
| ATOM | 4596 | CB  | ASP | 570 | 114.503 | 38.692 | 56.400 | 1.00       | 58.07 | 1SG4597 |
| ATOM | 4597 | CG  | ASP | 570 | 114.402 | 39.196 | 54.967 | 1.00       | 58.07 | 1SG4598 |
| ATOM | 4598 | OD1 | ASP | 570 | 114.853 | 38.465 | 54.046 | 1.00       | 58.07 | 1SG4599 |
| ATOM | 4599 | OD2 | ASP | 570 | 113.873 | 40.319 | 54.769 | 1.00       | 58.07 | 1SG4600 |
| ATOM | 4600 | C   | ASP | 570 | 116.833 | 38.019 | 56.084 | 1.00       | 58.07 | 1SG4601 |
| ATOM | 4601 | O   | ASP | 570 | 117.262 | 39.045 | 56.605 | 1.00       | 58.07 | 1SG4602 |
| ATOM | 4602 | N   | GLY | 571 | 117.541 | 37.324 | 55.175 | 1.00       | 41.99 | 1SG4603 |
| ATOM | 4603 | CA  | GLY | 571 | 118.877 | 37.688 | 54.781 | 1.00       | 41.99 | 1SG4604 |
| ATOM | 4604 | C   | GLY | 571 | 118.900 | 38.979 | 54.017 | 1.00       | 41.99 | 1SG4605 |
| ATOM | 4605 | O   | GLY | 571 | 119.857 | 39.748 | 54.103 | 1.00       | 41.99 | 1SG4606 |
| ATOM | 4606 | N   | PHE | 572 | 117.873 | 39.202 | 53.181 | 1.00129.00 |       | 1SG4607 |
| ATOM | 4607 | CA  | PHE | 572 | 117.780 | 40.354 | 52.331 | 1.00129.00 |       | 1SG4608 |
| ATOM | 4608 | CB  | PHE | 572 | 116.562 | 40.197 | 51.407 | 1.00129.00 |       | 1SG4609 |
| ATOM | 4609 | CG  | PHE | 572 | 116.606 | 41.235 | 50.352 | 1.00129.00 |       | 1SG4610 |
| ATOM | 4610 | CD1 | PHE | 572 | 116.022 | 42.461 | 50.558 | 1.00129.00 |       | 1SG4611 |
| ATOM | 4611 | CD2 | PHE | 572 | 117.233 | 40.967 | 49.158 | 1.00129.00 |       | 1SG4612 |
| ATOM | 4612 | CE1 | PHE | 572 | 116.064 | 43.415 | 49.574 | 1.00129.00 |       | 1SG4613 |
| ATOM | 4613 | CE2 | PHE | 572 | 117.280 | 41.916 | 48.169 | 1.00129.00 |       | 1SG4614 |

## Supplementary material 1.txt

|      |      |     |     |     |         |        |        |            |         |
|------|------|-----|-----|-----|---------|--------|--------|------------|---------|
| ATOM | 4614 | CZ  | PHE | 572 | 116.692 | 43.137 | 48.384 | 1.00129.00 | 1SG4615 |
| ATOM | 4615 | C   | PHE | 572 | 117.619 | 41.593 | 53.164 | 1.00129.00 | 1SG4616 |
| ATOM | 4616 | O   | PHE | 572 | 118.315 | 42.588 | 52.962 | 1.00129.00 | 1SG4617 |
| ATOM | 4617 | N   | SER | 573 | 116.676 | 41.559 | 54.123 | 1.00 97.24 | 1SG4618 |
| ATOM | 4618 | CA  | SER | 573 | 116.426 | 42.680 | 54.984 | 1.00 97.24 | 1SG4619 |
| ATOM | 4619 | CB  | SER | 573 | 115.188 | 42.465 | 55.865 | 1.00 97.24 | 1SG4620 |
| ATOM | 4620 | OG  | SER | 573 | 114.974 | 43.597 | 56.691 | 1.00 97.24 | 1SG4621 |
| ATOM | 4621 | C   | SER | 573 | 117.611 | 42.859 | 55.889 | 1.00 97.24 | 1SG4622 |
| ATOM | 4622 | O   | SER | 573 | 118.064 | 43.984 | 56.097 | 1.00 97.24 | 1SG4623 |
| ATOM | 4623 | N   | ILE | 574 | 118.125 | 41.753 | 56.477 | 1.00111.12 | 1SG4624 |
| ATOM | 4624 | CA  | ILE | 574 | 119.297 | 41.865 | 57.303 | 1.00111.12 | 1SG4625 |
| ATOM | 4625 | CB  | ILE | 574 | 119.101 | 41.397 | 58.728 | 1.00111.12 | 1SG4626 |
| ATOM | 4626 | CG2 | ILE | 574 | 118.690 | 39.918 | 58.768 | 1.00111.12 | 1SG4627 |
| ATOM | 4627 | CG1 | ILE | 574 | 120.346 | 41.723 | 59.564 | 1.00111.12 | 1SG4628 |
| ATOM | 4628 | CD1 | ILE | 574 | 120.132 | 41.529 | 61.063 | 1.00111.12 | 1SG4629 |
| ATOM | 4629 | C   | ILE | 574 | 120.408 | 41.103 | 56.637 | 1.00111.12 | 1SG4630 |
| ATOM | 4630 | O   | ILE | 574 | 120.525 | 39.884 | 56.741 | 1.00111.12 | 1SG4631 |
| ATOM | 4631 | N   | SER | 575 | 121.247 | 41.854 | 55.903 | 1.00 70.47 | 1SG4632 |
| ATOM | 4632 | CA  | SER | 575 | 122.335 | 41.379 | 55.097 | 1.00 70.47 | 1SG4633 |
| ATOM | 4633 | CB  | SER | 575 | 122.814 | 42.501 | 54.161 | 1.00 70.47 | 1SG4634 |
| ATOM | 4634 | OG  | SER | 575 | 123.460 | 43.515 | 54.912 | 1.00 70.47 | 1SG4635 |
| ATOM | 4635 | C   | SER | 575 | 123.535 | 40.957 | 55.893 | 1.00 70.47 | 1SG4636 |
| ATOM | 4636 | O   | SER | 575 | 124.119 | 39.906 | 55.635 | 1.00 70.47 | 1SG4637 |
| ATOM | 4637 | N   | ASN | 576 | 123.901 | 41.737 | 56.926 | 1.00107.67 | 1SG4638 |
| ATOM | 4638 | CA  | ASN | 576 | 125.191 | 41.592 | 57.547 | 1.00107.67 | 1SG4639 |
| ATOM | 4639 | CB  | ASN | 576 | 125.407 | 42.553 | 58.732 | 1.00107.67 | 1SG4640 |
| ATOM | 4640 | CG  | ASN | 576 | 124.399 | 42.229 | 59.824 | 1.00107.67 | 1SG4641 |
| ATOM | 4641 | OD1 | ASN | 576 | 124.762 | 41.730 | 60.888 | 1.00107.67 | 1SG4642 |
| ATOM | 4642 | ND2 | ASN | 576 | 123.098 | 42.524 | 59.562 | 1.00107.67 | 1SG4643 |
| ATOM | 4643 | C   | ASN | 576 | 125.452 | 40.198 | 58.029 | 1.00107.67 | 1SG4644 |
| ATOM | 4644 | O   | ASN | 576 | 126.561 | 39.691 | 57.864 | 1.00107.67 | 1SG4645 |
| ATOM | 4645 | N   | LYS | 577 | 124.460 | 39.542 | 58.647 | 1.00 77.87 | 1SG4646 |
| ATOM | 4646 | CA  | LYS | 577 | 124.677 | 38.235 | 59.199 | 1.00 77.87 | 1SG4647 |
| ATOM | 4647 | CB  | LYS | 577 | 123.477 | 37.726 | 60.016 | 1.00 77.87 | 1SG4648 |
| ATOM | 4648 | CG  | LYS | 577 | 123.292 | 38.465 | 61.341 | 1.00 77.87 | 1SG4649 |
| ATOM | 4649 | CD  | LYS | 577 | 121.960 | 38.170 | 62.034 | 1.00 77.87 | 1SG4650 |
| ATOM | 4650 | CE  | LYS | 577 | 121.839 | 38.827 | 63.410 | 1.00 77.87 | 1SG4651 |
| ATOM | 4651 | NZ  | LYS | 577 | 122.823 | 38.231 | 64.341 | 1.00 77.87 | 1SG4652 |
| ATOM | 4652 | C   | LYS | 577 | 124.960 | 37.206 | 58.143 | 1.00 77.87 | 1SG4653 |
| ATOM | 4653 | O   | LYS | 577 | 125.827 | 36.355 | 58.334 | 1.00 77.87 | 1SG4654 |
| ATOM | 4654 | N   | VAL | 578 | 124.260 | 37.255 | 56.991 | 1.00100.62 | 1SG4655 |
| ATOM | 4655 | CA  | VAL | 578 | 124.384 | 36.174 | 56.053 | 1.00100.62 | 1SG4656 |
| ATOM | 4656 | CB  | VAL | 578 | 123.056 | 35.582 | 55.683 | 1.00100.62 | 1SG4657 |
| ATOM | 4657 | CG1 | VAL | 578 | 123.284 | 34.473 | 54.641 | 1.00100.62 | 1SG4658 |
| ATOM | 4658 | CG2 | VAL | 578 | 122.360 | 35.102 | 56.968 | 1.00100.62 | 1SG4659 |
| ATOM | 4659 | C   | VAL | 578 | 125.013 | 36.637 | 54.776 | 1.00100.62 | 1SG4660 |
| ATOM | 4660 | O   | VAL | 578 | 126.086 | 36.165 | 54.408 | 1.00100.62 | 1SG4661 |
| ATOM | 4661 | N   | ILE | 579 | 124.347 | 37.561 | 54.056 | 1.00171.99 | 1SG4662 |
| ATOM | 4662 | CA  | ILE | 579 | 124.790 | 37.968 | 52.751 | 1.00171.99 | 1SG4663 |
| ATOM | 4663 | CB  | ILE | 579 | 123.809 | 38.794 | 51.962 | 1.00171.99 | 1SG4664 |
| ATOM | 4664 | CG2 | ILE | 579 | 122.518 | 37.976 | 51.847 | 1.00171.99 | 1SG4665 |
| ATOM | 4665 | CG1 | ILE | 579 | 123.576 | 40.171 | 52.572 | 1.00171.99 | 1SG4666 |
| ATOM | 4666 | CD1 | ILE | 579 | 124.687 | 41.187 | 52.303 | 1.00171.99 | 1SG4667 |
| ATOM | 4667 | C   | ILE | 579 | 126.118 | 38.663 | 52.772 | 1.00171.99 | 1SG4668 |
| ATOM | 4668 | O   | ILE | 579 | 126.871 | 38.560 | 51.807 | 1.00171.99 | 1SG4669 |
| ATOM | 4669 | N   | LYS | 580 | 126.443 | 39.406 | 53.846 | 1.00 86.75 | 1SG4670 |
| ATOM | 4670 | CA  | LYS | 580 | 127.645 | 40.201 | 53.881 | 1.00 86.75 | 1SG4671 |
| ATOM | 4671 | CB  | LYS | 580 | 127.898 | 40.801 | 55.274 | 1.00 86.75 | 1SG4672 |
| ATOM | 4672 | CG  | LYS | 580 | 129.163 | 41.654 | 55.364 | 1.00 86.75 | 1SG4673 |
| ATOM | 4673 | CD  | LYS | 580 | 129.301 | 42.385 | 56.700 | 1.00 86.75 | 1SG4674 |
| ATOM | 4674 | CE  | LYS | 580 | 129.312 | 41.438 | 57.903 | 1.00 86.75 | 1SG4675 |
| ATOM | 4675 | NZ  | LYS | 580 | 129.591 | 42.192 | 59.145 | 1.00 86.75 | 1SG4676 |
| ATOM | 4676 | C   | LYS | 580 | 128.856 | 39.368 | 53.567 | 1.00 86.75 | 1SG4677 |
| ATOM | 4677 | O   | LYS | 580 | 129.667 | 39.746 | 52.723 | 1.00 86.75 | 1SG4678 |
| ATOM | 4678 | N   | ASP | 581 | 129.013 | 38.199 | 54.211 | 1.00 33.47 | 1SG4679 |
| ATOM | 4679 | CA  | ASP | 581 | 130.197 | 37.414 | 53.994 | 1.00 33.47 | 1SG4680 |
| ATOM | 4680 | CB  | ASP | 581 | 130.222 | 36.136 | 54.849 | 1.00 33.47 | 1SG4681 |
| ATOM | 4681 | CG  | ASP | 581 | 130.425 | 36.546 | 56.301 | 1.00 33.47 | 1SG4682 |
| ATOM | 4682 | OD1 | ASP | 581 | 131.324 | 37.392 | 56.557 | 1.00 33.47 | 1SG4683 |
| ATOM | 4683 | OD2 | ASP | 581 | 129.690 | 36.013 | 57.174 | 1.00 33.47 | 1SG4684 |
| ATOM | 4684 | C   | ASP | 581 | 130.265 | 36.988 | 52.560 | 1.00 33.47 | 1SG4685 |

## Supplementary material 1.txt

|      |      |     |     |     |         |        |        |      |        |         |
|------|------|-----|-----|-----|---------|--------|--------|------|--------|---------|
| ATOM | 4685 | O   | ASP | 581 | 131.326 | 37.035 | 51.939 | 1.00 | 33.47  | 1SG4686 |
| ATOM | 4686 | N   | GLN | 582 | 129.124 | 36.568 | 51.986 | 1.00 | 37.94  | 1SG4687 |
| ATOM | 4687 | CA  | GLN | 582 | 129.139 | 36.078 | 50.639 | 1.00 | 37.94  | 1SG4688 |
| ATOM | 4688 | CB  | GLN | 582 | 127.775 | 35.561 | 50.153 | 1.00 | 37.94  | 1SG4689 |
| ATOM | 4689 | CG  | GLN | 582 | 127.303 | 34.292 | 50.861 | 1.00 | 37.94  | 1SG4690 |
| ATOM | 4690 | CD  | GLN | 582 | 125.978 | 33.892 | 50.231 | 1.00 | 37.94  | 1SG4691 |
| ATOM | 4691 | OE1 | GLN | 582 | 125.024 | 34.667 | 50.200 | 1.00 | 37.94  | 1SG4692 |
| ATOM | 4692 | NE2 | GLN | 582 | 125.921 | 32.643 | 49.695 | 1.00 | 37.94  | 1SG4693 |
| ATOM | 4693 | C   | GLN | 582 | 129.539 | 37.168 | 49.697 | 1.00 | 37.94  | 1SG4694 |
| ATOM | 4694 | O   | GLN | 582 | 130.323 | 36.939 | 48.778 | 1.00 | 37.94  | 1SG4695 |
| ATOM | 4695 | N   | VAL | 583 | 129.016 | 38.391 | 49.902 | 1.00 | 100.74 | 1SG4696 |
| ATOM | 4696 | CA  | VAL | 583 | 129.314 | 39.447 | 48.981 | 1.00 | 100.74 | 1SG4697 |
| ATOM | 4697 | CB  | VAL | 583 | 128.585 | 40.734 | 49.248 | 1.00 | 100.74 | 1SG4698 |
| ATOM | 4698 | CG1 | VAL | 583 | 127.071 | 40.461 | 49.199 | 1.00 | 100.74 | 1SG4699 |
| ATOM | 4699 | CG2 | VAL | 583 | 129.085 | 41.331 | 50.566 | 1.00 | 100.74 | 1SG4700 |
| ATOM | 4700 | C   | VAL | 583 | 130.781 | 39.731 | 49.024 | 1.00 | 100.74 | 1SG4701 |
| ATOM | 4701 | O   | VAL | 583 | 131.395 | 39.967 | 47.987 | 1.00 | 100.74 | 1SG4702 |
| ATOM | 4702 | N   | GLN | 584 | 131.389 | 39.737 | 50.225 | 1.00 | 126.07 | 1SG4703 |
| ATOM | 4703 | CA  | GLN | 584 | 132.792 | 40.011 | 50.326 | 1.00 | 126.07 | 1SG4704 |
| ATOM | 4704 | CB  | GLN | 584 | 133.230 | 40.259 | 51.784 | 1.00 | 126.07 | 1SG4705 |
| ATOM | 4705 | CG  | GLN | 584 | 132.848 | 39.158 | 52.776 | 1.00 | 126.07 | 1SG4706 |
| ATOM | 4706 | CD  | GLN | 584 | 134.020 | 38.220 | 52.994 | 1.00 | 126.07 | 1SG4707 |
| ATOM | 4707 | OE1 | GLN | 584 | 134.951 | 38.149 | 52.194 | 1.00 | 126.07 | 1SG4708 |
| ATOM | 4708 | NE2 | GLN | 584 | 133.976 | 37.481 | 54.135 | 1.00 | 126.07 | 1SG4709 |
| ATOM | 4709 | C   | GLN | 584 | 133.586 | 38.921 | 49.668 | 1.00 | 126.07 | 1SG4710 |
| ATOM | 4710 | O   | GLN | 584 | 134.542 | 39.186 | 48.942 | 1.00 | 126.07 | 1SG4711 |
| ATOM | 4711 | N   | LYS | 585 | 133.197 | 37.654 | 49.872 | 1.00 | 133.18 | 1SG4712 |
| ATOM | 4712 | CA  | LYS | 585 | 133.941 | 36.589 | 49.268 | 1.00 | 133.18 | 1SG4713 |
| ATOM | 4713 | CB  | LYS | 585 | 133.404 | 35.201 | 49.660 | 1.00 | 133.18 | 1SG4714 |
| ATOM | 4714 | CG  | LYS | 585 | 133.644 | 34.809 | 51.122 | 1.00 | 133.18 | 1SG4715 |
| ATOM | 4715 | CD  | LYS | 585 | 135.127 | 34.716 | 51.494 | 1.00 | 133.18 | 1SG4716 |
| ATOM | 4716 | CE  | LYS | 585 | 135.392 | 34.027 | 52.836 | 1.00 | 133.18 | 1SG4717 |
| ATOM | 4717 | NZ  | LYS | 585 | 134.729 | 34.766 | 53.932 | 1.00 | 133.18 | 1SG4718 |
| ATOM | 4718 | C   | LYS | 585 | 133.842 | 36.684 | 47.770 | 1.00 | 133.18 | 1SG4719 |
| ATOM | 4719 | O   | LYS | 585 | 134.823 | 36.439 | 47.071 | 1.00 | 133.18 | 1SG4720 |
| ATOM | 4720 | N   | VAL | 586 | 132.628 | 36.935 | 47.234 | 1.00 | 83.39  | 1SG4721 |
| ATOM | 4721 | CA  | VAL | 586 | 132.427 | 37.003 | 45.809 | 1.00 | 83.39  | 1SG4722 |
| ATOM | 4722 | CB  | VAL | 586 | 130.989 | 36.797 | 45.438 | 1.00 | 83.39  | 1SG4723 |
| ATOM | 4723 | CG1 | VAL | 586 | 130.846 | 36.960 | 43.916 | 1.00 | 83.39  | 1SG4724 |
| ATOM | 4724 | CG2 | VAL | 586 | 130.541 | 35.424 | 45.969 | 1.00 | 83.39  | 1SG4725 |
| ATOM | 4725 | C   | VAL | 586 | 132.862 | 38.288 | 45.143 | 1.00 | 83.39  | 1SG4726 |
| ATOM | 4726 | O   | VAL | 586 | 133.593 | 38.275 | 44.154 | 1.00 | 83.39  | 1SG4727 |
| ATOM | 4727 | N   | LEU | 587 | 132.303 | 39.428 | 45.598 | 1.00 | 155.96 | 1SG4728 |
| ATOM | 4728 | CA  | LEU | 587 | 132.535 | 40.734 | 45.036 | 1.00 | 155.96 | 1SG4729 |
| ATOM | 4729 | CB  | LEU | 587 | 131.359 | 41.685 | 45.310 | 1.00 | 155.96 | 1SG4730 |
| ATOM | 4730 | CG  | LEU | 587 | 130.113 | 41.386 | 44.455 | 1.00 | 155.96 | 1SG4731 |
| ATOM | 4731 | CD2 | LEU | 587 | 129.716 | 39.903 | 44.519 | 1.00 | 155.96 | 1SG4732 |
| ATOM | 4732 | CD1 | LEU | 587 | 130.312 | 41.861 | 43.010 | 1.00 | 155.96 | 1SG4733 |
| ATOM | 4733 | C   | LEU | 587 | 133.789 | 41.454 | 45.454 | 1.00 | 155.96 | 1SG4734 |
| ATOM | 4734 | O   | LEU | 587 | 134.432 | 42.087 | 44.619 | 1.00 | 155.96 | 1SG4735 |
| ATOM | 4735 | N   | ILE | 588 | 134.095 | 41.513 | 46.770 | 1.00 | 165.01 | 1SG4736 |
| ATOM | 4736 | CA  | ILE | 588 | 135.243 | 42.285 | 47.172 | 1.00 | 165.01 | 1SG4737 |
| ATOM | 4737 | CB  | ILE | 588 | 135.140 | 42.870 | 48.559 | 1.00 | 165.01 | 1SG4738 |
| ATOM | 4738 | CG2 | ILE | 588 | 135.201 | 41.754 | 49.610 | 1.00 | 165.01 | 1SG4739 |
| ATOM | 4739 | CG1 | ILE | 588 | 136.231 | 43.936 | 48.745 | 1.00 | 165.01 | 1SG4740 |
| ATOM | 4740 | CD1 | ILE | 588 | 136.039 | 45.160 | 47.851 | 1.00 | 165.01 | 1SG4741 |
| ATOM | 4741 | C   | ILE | 588 | 136.574 | 41.602 | 47.042 | 1.00 | 165.01 | 1SG4742 |
| ATOM | 4742 | O   | ILE | 588 | 137.464 | 42.097 | 46.353 | 1.00 | 165.01 | 1SG4743 |
| ATOM | 4743 | N   | VAL | 589 | 136.734 | 40.411 | 47.656 | 1.00 | 116.04 | 1SG4744 |
| ATOM | 4744 | CA  | VAL | 589 | 138.051 | 39.842 | 47.731 | 1.00 | 116.04 | 1SG4745 |
| ATOM | 4745 | CB  | VAL | 589 | 138.347 | 39.204 | 49.053 | 1.00 | 116.04 | 1SG4746 |
| ATOM | 4746 | CG1 | VAL | 589 | 137.385 | 38.020 | 49.245 | 1.00 | 116.04 | 1SG4747 |
| ATOM | 4747 | CG2 | VAL | 589 | 139.832 | 38.805 | 49.078 | 1.00 | 116.04 | 1SG4748 |
| ATOM | 4748 | C   | VAL | 589 | 138.234 | 38.792 | 46.691 | 1.00 | 116.04 | 1SG4749 |
| ATOM | 4749 | O   | VAL | 589 | 137.397 | 37.916 | 46.482 | 1.00 | 116.04 | 1SG4750 |
| ATOM | 4750 | N   | PRO | 590 | 139.348 | 38.924 | 46.023 | 1.00 | 151.86 | 1SG4751 |
| ATOM | 4751 | CA  | PRO | 590 | 139.711 | 37.956 | 45.023 | 1.00 | 151.86 | 1SG4752 |
| ATOM | 4752 | CD  | PRO | 590 | 139.758 | 40.267 | 45.642 | 1.00 | 151.86 | 1SG4753 |
| ATOM | 4753 | CB  | PRO | 590 | 140.630 | 38.678 | 44.039 | 1.00 | 151.86 | 1SG4754 |
| ATOM | 4754 | CG  | PRO | 590 | 140.242 | 40.157 | 44.190 | 1.00 | 151.86 | 1SG4755 |
| ATOM | 4755 | C   | PRO | 590 | 140.372 | 36.774 | 45.659 | 1.00 | 151.86 | 1SG4756 |

|      |      |     |     |     | Supplementary material 1.txt |        |        |            |         |
|------|------|-----|-----|-----|------------------------------|--------|--------|------------|---------|
| ATOM | 4756 | O   | PRO | 590 | 140.815                      | 36.879 | 46.801 | 1.00151.86 | 1SG4757 |
| ATOM | 4757 | N   | VAL | 591 | 140.448                      | 35.640 | 44.934 | 1.00123.05 | 1SG4758 |
| ATOM | 4758 | CA  | VAL | 591 | 141.117                      | 34.483 | 45.443 | 1.00123.05 | 1SG4759 |
| ATOM | 4759 | CB  | VAL | 591 | 140.907                      | 33.264 | 44.587 | 1.00123.05 | 1SG4760 |
| ATOM | 4760 | CG1 | VAL | 591 | 139.405                      | 32.937 | 44.566 | 1.00123.05 | 1SG4761 |
| ATOM | 4761 | CG2 | VAL | 591 | 141.507                      | 33.503 | 43.192 | 1.00123.05 | 1SG4762 |
| ATOM | 4762 | C   | VAL | 591 | 142.568                      | 34.826 | 45.420 | 1.00123.05 | 1SG4763 |
| ATOM | 4763 | O   | VAL | 591 | 143.086                      | 35.362 | 44.441 | 1.00123.05 | 1SG4764 |
| ATOM | 4764 | N   | PRO | 592 | 143.220                      | 34.499 | 46.499 | 1.00211.18 | 1SG4765 |
| ATOM | 4765 | CA  | PRO | 592 | 144.594                      | 34.865 | 46.697 | 1.00211.18 | 1SG4766 |
| ATOM | 4766 | CD  | PRO | 592 | 142.518                      | 34.305 | 47.758 | 1.00211.18 | 1SG4767 |
| ATOM | 4767 | CB  | PRO | 592 | 144.914                      | 34.496 | 48.144 | 1.00211.18 | 1SG4768 |
| ATOM | 4768 | CG  | PRO | 592 | 143.551                      | 34.616 | 48.854 | 1.00211.18 | 1SG4769 |
| ATOM | 4769 | C   | PRO | 592 | 145.552                      | 34.317 | 45.698 | 1.00211.18 | 1SG4770 |
| ATOM | 4770 | O   | PRO | 592 | 146.583                      | 34.951 | 45.492 | 1.00211.18 | 1SG4771 |
| ATOM | 4771 | N   | ILE | 593 | 145.249                      | 33.156 | 45.087 | 1.00110.67 | 1SG4772 |
| ATOM | 4772 | CA  | ILE | 593 | 146.093                      | 32.566 | 44.087 | 1.00110.67 | 1SG4773 |
| ATOM | 4773 | CB  | ILE | 593 | 145.885                      | 33.183 | 42.726 | 1.00110.67 | 1SG4774 |
| ATOM | 4774 | CG2 | ILE | 593 | 146.198                      | 34.686 | 42.795 | 1.00110.67 | 1SG4775 |
| ATOM | 4775 | CG1 | ILE | 593 | 146.673                      | 32.422 | 41.650 | 1.00110.67 | 1SG4776 |
| ATOM | 4776 | CD1 | ILE | 593 | 146.319                      | 32.853 | 40.227 | 1.00110.67 | 1SG4777 |
| ATOM | 4777 | C   | ILE | 593 | 147.570                      | 32.631 | 44.462 | 1.00110.67 | 1SG4778 |
| ATOM | 4778 | O   | ILE | 593 | 147.935                      | 32.068 | 45.529 | 1.00110.67 | 1SG4779 |
| ATOM | 4779 | OXT | ILE | 593 | 148.353                      | 33.240 | 43.685 | 1.00110.67 | 1SG4780 |
| END  |      |     |     |     |                              |        |        |            |         |
